# Supplementary material for: Aligning the Aligners: Comparison of RNA Sequencing Data Alignment and Gene Expression Quantification Tools for Clinical Breast Cancer Research
Source: Preprints.org preprint supplement (doi:10.20944/preprints201903.0036.v1), 2019-03-04
Supplement: Supplementary file 1 [file Supplemental Table 1.xlsx]

## Sheet: Supplemental_Table_1
SRX ID	Run ID	Cancer stage	Sequence 1	Count	% total	Notes	Sequence 2	Count	% total	Notes
SRX286934	SRR868806	Atypia/EN	AAAAAAAAAAAAAAAAAAAAAAAAAAAAAAAAAAAA	1452237	18	poly(A)	GATCGGAAGAGCTCGTATGCCGTCTTCTGCTTGAAA	1134655	14	Illumina Adapter 1
SRX286934	SRR868807	Atypia/EN	AAAAAAAAAAAAAAAAAAAAAAAAAAAAAAAAAAAA	3946486	27	poly(A)	GATCGGAAGAGCTCGTATGCCGTCTTCTGCTTGAAA	1704730	11	Illumina Adapter 1
SRX286935	SRR868808	Normal	GATCGGAAGAGCTCGTATGCCGTCTTCTGCTTGAAA	1374348	15.1927	Illumina Adapter 1	AAAAAAAAAAAAAAAAAAAAAAAAAAAAAAAAAAAA	1169548	12.9288	poly(A)
SRX286935	SRR868809	Normal	AAAAAAAAAAAAAAAAAAAAAAAAAAAAAAAAAAAA	2748691	19.2359	poly(A)	GATCGGAAGAGCTCGTATGCCGTCTTCTGCTTGAAA	1657651	11.6006	Illumina Adapter 1
SRX286936	SRR868810	Atypia/EN	AAAAAAAAAAAAAAAAAAAAAAAAAAAAAAAAAAAA	6168811	23	poly(A)	CGGCATACGAGCTCTTCCGATCTTTTTTTTTTTTTT	1776853	6	Illumina Adapter 2
SRX286937	SRR868811	Normal	AAAAAAAAAAAAAAAAAAAAAAAAAAAAAAAAAAAA	3733680	30.2883	poly(A)	CGGCATACGAGCTCTTCCGATCTTTTTTTTTTTTTT	675335	5.47845	Illumina Adapter 2
SRX286938	SRR868812	Normal	AAAAAAAAAAAAAAAAAAAAAAAAAAAAAAAAAAAA	1729704	13.0085	poly(A)	GATCGGAAGAGCTCGTATGCCGTCTTCTGCTTGAAA	1502050	11.2964	Illumina Adapter 1
SRX286939	SRR868813	Atypia/EN	AAAAAAAAAAAAAAAAAAAAAAAAAAAAAAAAAAAA	1314315	11	poly(A)	GATCGGAAGAGCTCGTATGCCGTCTTCTGCTTGAAA	1253360	11	Illumina Adapter 1
SRX286940	SRR868814	DCIS	AAAAAAAAAAAAAAAAAAAAAAAAAAAAAAAAAAAA	1525278	27.668	poly(A)	GATCGGAAGAGCTCGTATGCCGTCTTCTGCTTGAAA	1196274	21.7	Illumina Adapter 1
SRX286940	SRR868815	DCIS	AAAAAAAAAAAAAAAAAAAAAAAAAAAAAAAAAAAA	4410597	32.5646	poly(A)	GATCGGAAGAGCTCGTATGCCGTCTTCTGCTTGAAA	3499327	25.8365	Illumina Adapter 1
SRX286941	SRR868816	Normal	AAAAAAAAAAAAAAAAAAAAAAAAAAAAAAAAAAAA	2163667	42.6324	poly(A)	GATCGGAAGAGCTCGTATGCCGTCTTCTGCTTGAAA	957309	18.8626	Illumina Adapter 1
SRX286941	SRR868817	Normal	AAAAAAAAAAAAAAAAAAAAAAAAAAAAAAAAAAAA	3408816	48.6618	poly(A)	GATCGGAAGAGCTCGTATGCCGTCTTCTGCTTGAAA	1630879	23.2812	Illumina Adapter 1
SRX286941	SRR868818	Normal	AAAAAAAAAAAAAAAAAAAAAAAAAAAAAAAAAAAA	5405058	47.0186	poly(A)	GATCGGAAGAGCTCGTATGCCGTCTTCTGCTTGAAA	2958979	25.7402	Illumina Adapter 1
SRX286942	SRR868819	Atypia/EN	AAAAAAAAAAAAAAAAAAAAAAAAAAAAAAAAAAAA	2516831	36	poly(A)	GATCGGAAGAGCTCGTATGCCGTCTTCTGCTTGAAA	1260859	18	Illumina Adapter 1
SRX286942	SRR868820	Atypia/EN	AAAAAAAAAAAAAAAAAAAAAAAAAAAAAAAAAAAA	4046377	46	poly(A)	GATCGGAAGAGCTCGTATGCCGTCTTCTGCTTGAAA	1944243	22	Illumina Adapter 1
SRX286942	SRR868821	Atypia/EN	AAAAAAAAAAAAAAAAAAAAAAAAAAAAAAAAAAAA	9522455	43	poly(A)	GATCGGAAGAGCTCGTATGCCGTCTTCTGCTTGAAA	5382736	24	Illumina Adapter 1
SRX286943	SRR868822	Normal	AAAAAAAAAAAAAAAAAAAAAAAAAAAAAAAAAAAA	4880808	35.0384	poly(A)	GATCGGAAGAGCTCGTATGCCGTCTTCTGCTTGAAA	1193957	8.57119	Illumina Adapter 1
SRX286944	SRR868823	Atypia/EN	AAAAAAAAAAAAAAAAAAAAAAAAAAAAAAAAAAAA	3404855	27	poly(A)	GATCGGAAGAGCTCGTATGCCGTCTTCTGCTTGAAA	2187961	17	Illumina Adapter 1
SRX286945	SRR868824	Atypia/EN	AAAAAAAAAAAAAAAAAAAAAAAAAAAAAAAAAAAA	2071510	19	poly(A)	GATCGGAAGAGCTCGTATGCCGTCTTCTGCTTGAAA	1361185	12	Illumina Adapter 1
SRX286946	SRR868825	Normal	AAAAAAAAAAAAAAAAAAAAAAAAAAAAAAAAAAAA	5464040	39.5332	poly(A)	GATCGGAAGAGCTCGTATGCCGTCTTCTGCTTGAAA	1572116	11.3745	Illumina Adapter 1
SRX286947	SRR868826	Atypia/EN	AAAAAAAAAAAAAAAAAAAAAAAAAAAAAAAAAAAA	5570357	35	poly(A)	GATCGGAAGAGCTCGTATGCCGTCTTCTGCTTGAAA	2767984	17	Illumina Adapter 1
SRX286948	SRR868827	DCIS	AAAAAAAAAAAAAAAAAAAAAAAAAAAAAAAAAAAA	5058106	34.5407	poly(A)	GATCGGAAGAGCTCGTATGCCGTCTTCTGCTTGAAA	2443434	16.6857	Illumina Adapter 1
SRX286949	SRR868828	Normal	AAAAAAAAAAAAAAAAAAAAAAAAAAAAAAAAAAAA	6954237	45.1844	poly(A)	GATCGGAAGAGCTCGTATGCCGTCTTCTGCTTGAAA	1231898	8.00413	Illumina Adapter 1
SRX286950	SRR868829	DCIS	AAAAAAAAAAAAAAAAAAAAAAAAAAAAAAAAAAAA	4342162	30.305	poly(A)	GATCGGAAGAGCTCGTATGCCGTCTTCTGCTTGAAA	1717184	11.9847	Illumina Adapter 1
SRX286951	SRR868830	IDC	AAAAAAAAAAAAAAAAAAAAAAAAAAAAAAAAAAAA	3859553	28.2594	poly(A)	GATCGGAAGAGCTCGTATGCCGTCTTCTGCTTGAAA	1048353	7.67598	Illumina Adapter 1
SRX286952	SRR868831	Atypia/EN	AAAAAAAAAAAAAAAAAAAAAAAAAAAAAAAAAAAA	4324350	32	poly(A)	GATCGGAAGAGCTCGTATGCCGTCTTCTGCTTGAAA	1321769	9	Illumina Adapter 1
SRX286953	SRR868832	Normal	AAAAAAAAAAAAAAAAAAAAAAAAAAAAAAAAAAAA	1189400	36.2752	poly(A)	GATCGGAAGAGCTCGTATGCCGTCTTCTGCTTGAAA	430611	13.1331	Illumina Adapter 1
SRX286953	SRR868833	Normal	AAAAAAAAAAAAAAAAAAAAAAAAAAAAAAAAAAAA	3654710	29.5269	poly(A)	GATCGGAAGAGCTCGTATGCCGTCTTCTGCTTGAAA	1230429	9.94079	Illumina Adapter 1
SRX286954	SRR868834	Normal	AAAAAAAAAAAAAAAAAAAAAAAAAAAAAAAAAAAA	3924340	22.7587	poly(A)	CGGCATACGAGCTCTTCCGATCTTTTTTTTTTTTTT	533897	3.09626	Illumina Adapter 2
SRX286955	SRR868835	IDC	AAAAAAAAAAAAAAAAAAAAAAAAAAAAAAAAAAAA	3331604	17.7106	poly(A)	CGAGCTCTTCCGATCTTTTTTTTTTTTTTTTTTTTT	143411	0.762366	Illumina Adapter 2
SRX286956	SRR868836	Normal	AAAAAAAAAAAAAAAAAAAAAAAAAAAAAAAAAAAA	3930091	27.4241	poly(A)	CGGCATACGAGCTCTTCCGATCTTTTTTTTTTTTTT	448393	3.12888	Illumina Adapter 2
SRX286957	SRR868837	Atypia/EN	AAAAAAAAAAAAAAAAAAAAAAAAAAAAAAAAAAAA	2944306	17	poly(A)	GATCGGAAGAGCTCGTATGCCGTCTTCTGCTTGAAA	418648	2	Illumina Adapter 1
SRX286958	SRR868838	IDC	AAAAAAAAAAAAAAAAAAAAAAAAAAAAAAAAAAAA	3672868	25.6783	poly(A)	CGGCATACGAGCTCTTCCGATCTTTTTTTTTTTTTT	419183	2.93066	Illumina Adapter 2
SRX286959	SRR868839	Normal	AAAAAAAAAAAAAAAAAAAAAAAAAAAAAAAAAAAA	1552017	13.4061	poly(A)	CGGCATACGAGCTCTTCCGATCTTTTTTTTTTTTTT	416449	3.59724	Illumina Adapter 2
SRX286960	SRR868840	Atypia/EN	AAAAAAAAAAAAAAAAAAAAAAAAAAAAAAAAAAAA	3373533	19	poly(A)	GATCGGAAGAGCTCGTATGCCGTCTTCTGCTTGAAA	387753	2	Illumina Adapter 1
SRX286961	SRR868841	DCIS	AAAAAAAAAAAAAAAAAAAAAAAAAAAAAAAAAAAA	3270483	18.6286	poly(A)	CGAGCTCTTCCGATCTTTTTTTTTTTTTTTTTTTTT	149326	0.850556	Illumina Adapter 2
SRX286962	SRR868842	Normal	AAAAAAAAAAAAAAAAAAAAAAAAAAAAAAAAAAAA	3254190	18.3449	poly(A)	GATCGGAAGAGCTCGTATGCCGTCTTCTGCTTGAAA	177797	1.0023	Illumina Adapter 1
SRX286963	SRR868843	Atypia/EN	AAAAAAAAAAAAAAAAAAAAAAAAAAAAAAAAAAAA	1140395	6	poly(A)	GATCGGAAGAGCTCGTATGCCGTCTTCTGCTTGAAA	294997	1	Illumina Adapter 1
SRX286964	SRR868844	Atypia/EN	AAAAAAAAAAAAAAAAAAAAAAAAAAAAAAAAAAAA	4211564	27	poly(A)	CGGCATACGAGCTCTTCCGATCTTTTTTTTTTTTTT	1402758	8	Illumina Adapter 2
SRX286965	SRR868845	DCIS	AAAAAAAAAAAAAAAAAAAAAAAAAAAAAAAAAAAA	2483553	14.3589	poly(A)	CGGCATACGAGCTCTTCCGATCTTTTTTTTTTTTTT	1213536	7.01619	Illumina Adapter 2
SRX286966	SRR868846	Normal	AAAAAAAAAAAAAAAAAAAAAAAAAAAAAAAAAAAA	2461319	13.2874	poly(A)	CGGCATACGAGCTCTTCCGATCTTTTTTTTTTTTTT	1322944	7.14189	Illumina Adapter 2
SRX286967	SRR868847	Atypia/EN	AAAAAAAAAAAAAAAAAAAAAAAAAAAAAAAAAAAA	3305263	17	poly(A)	CGGCATACGAGCTCTTCCGATCTTTTTTTTTTTTTT	1452824	7	Illumina Adapter 2
SRX286968	SRR868848	IDC	AAAAAAAAAAAAAAAAAAAAAAAAAAAAAAAAAAAA	2456744	13.1763	poly(A)	CGGCATACGAGCTCTTCCGATCTTTTTTTTTTTTTT	1218547	6.53546	Illumina Adapter 2
SRX286969	SRR868849	Normal	AAAAAAAAAAAAAAAAAAAAAAAAAAAAAAAAAAAA	3357157	24.1184	poly(A)	CTTTTTTTTTTTTTTTTTTTTTTTTTTTTTTTTTTT	153188	1.10053	Illumina Adapter 2
SRX286970	SRR868850	Atypia/EN	AAAAAAAAAAAAAAAAAAAAAAAAAAAAAAAAAAAA	2495399	13	poly(A)	CGGCATACGAGCTCTTCCGATCTTTTTTTTTTTTTT	1274906	7	Illumina Adapter 2
SRX286971	SRR868851	IDC	AAAAAAAAAAAAAAAAAAAAAAAAAAAAAAAAAAAA	2326306	13.7059	poly(A)	CGGCATACGAGCTCTTCCGATCTTTTTTTTTTTTTT	1230529	7.24991	Illumina Adapter 2
SRX286972	SRR868852	Normal	AAAAAAAAAAAAAAAAAAAAAAAAAAAAAAAAAAAA	2751412	10.1883	poly(A)	CGAGCTCTTCCGATCTTTTTTTTTTTTTTTTTTTTT	1108252	4.10379	Illumina Adapter 2
SRX286973	SRR868853	Atypia/EN	AAAAAAAAAAAAAAAAAAAAAAAAAAAAAAAAAAAA	2950444	9	poly(A)	CGGCATACGAGCTCTTCCGATCTTTTTTTTTTTTTT	1592370	5	Illumina Adapter 2
SRX286974	SRR868854	IDC	AAAAAAAAAAAAAAAAAAAAAAAAAAAAAAAAAAAA	3170989	11.1408	poly(A)	CGAGCTCTTCCGATCTTTTTTTTTTTTTTTTTTTTT	1072331	3.76748	Illumina Adapter 2
SRX286975	SRR868855	Atypia/EN	AAAAAAAAAAAAAAAAAAAAAAAAAAAAAAAAAAAA	3253086	10	poly(A)	CGGCATACGAGCTCTTCCGATCTTTTTTTTTTTTTT	1178418	3	Illumina Adapter 2
SRX286976	SRR868856	IDC	AAAAAAAAAAAAAAAAAAAAAAAAAAAAAAAAAAAA	4573402	14.9301	poly(A)	CGAGCTCTTCCGATCTTTTTTTTTTTTTTTTTTTTT	1187702	3.87732	Illumina Adapter 2
SRX286977	SRR868857	Normal	AAAAAAAAAAAAAAAAAAAAAAAAAAAAAAAAAAAA	2141606	10.2785	poly(A)	CGGCATACGAGCTCTTCCGATCTTTTTTTTTTTTTT	301839	1.44865	Illumina Adapter 2
SRX286978	SRR868858	Atypia/EN	AAAAAAAAAAAAAAAAAAAAAAAAAAAAAAAAAAAA	1706906	8	poly(A)	CTTTTTTTTTTTTTTTTTTTTTTTTTTTTTTTTTTT	379225	1	Illumina Adapter 2
SRX286979	SRR868859	DCIS	AAAAAAAAAAAAAAAAAAAAAAAAAAAAAAAAAAAA	1476230	7.97907	poly(A)	CTTTTTTTTTTTTTTTTTTTTTTTTTTTTTTTTTTT	183877	0.993861	Illumina Adapter 2
SRX286980	SRR868860	IDC	AAAAAAAAAAAAAAAAAAAAAAAAAAAAAAAAAAAA	3023859	14.001	poly(A)	CGAGCTCTTCCGATCTTTTTTTTTTTTTTTTTTTTT	875507	4.05374	Illumina Adapter 2
SRX286981	SRR868861	Atypia/EN	AAAAAAAAAAAAAAAAAAAAAAAAAAAAAAAAAAAA	6617581	27	poly(A)	CGAGCTCTTCCGATCTTTTTTTTTTTTTTTTTTTTT	1556225	6	Illumina Adapter 2
SRX286982	SRR868862	Normal	AAAAAAAAAAAAAAAAAAAAAAAAAAAAAAAAAAAA	4475053	14.1079	poly(A)	CGAGCTCTTCCGATCTTTTTTTTTTTTTTTTTTTTT	2081904	6.56333	Illumina Adapter 2
SRX286983	SRR868863	DCIS	AAAAAAAAAAAAAAAAAAAAAAAAAAAAAAAAAAAA	2096184	10.0831	poly(A)	CTTTTTTTTTTTTTTTTTTTTTTTTTTTTTTTTTTT	253606	1.2199	Illumina Adapter 2
SRX286984	SRR868864	Atypia/EN	AAAAAAAAAAAAAAAAAAAAAAAAAAAAAAAAAAAA	1618156	8	poly(A)	CTTTTTTTTTTTTTTTTTTTTTTTTTTTTTTTTTTT	242954	1	Illumina Adapter 2
SRX286985	SRR868865	Normal	AAAAAAAAAAAAAAAAAAAAAAAAAAAAAAAAAAAA	1918960	10.3763	poly(A)	CGGCATACGAGCTCTTCCGATCTTTTTTTTTTTTTT	314238	1.69917	Illumina Adapter 2
SRX286986	SRR868866	Atypia/EN	AAAAAAAAAAAAAAAAAAAAAAAAAAAAAAAAAAAA	6660172	38	poly(A)	CGGCATACGAGCTCTTCCGATCTTTTTTTTTTTTTT	650371	3	Illumina Adapter 2
SRX286987	SRR868867	Normal	AAAAAAAAAAAAAAAAAAAAAAAAAAAAAAAAAAAA	6053717	26.8063	poly(A)	GATCGGAAGAGCTCGTATGCCGTCTTCTGCTTGAAA	675969	2.99324	Illumina Adapter 1
SRX286988	SRR868868	DCIS	AAAAAAAAAAAAAAAAAAAAAAAAAAAAAAAAAAAA	5841353	40.1607	poly(A)	GATCGGAAGAGCTCGTATGCCGTCTTCTGCTTGAAA	299116	2.0565	Illumina Adapter 1
SRX286989	SRR868869	IDC	AAAAAAAAAAAAAAAAAAAAAAAAAAAAAAAAAAAA	10813709	48.4777	poly(A)	GATCGGAAGAGCTCGTATGCCGTCTTCTGCTTGAAA	312624	1.40149	Illumina Adapter 1
SRX286990	SRR868870	IDC	AAAAAAAAAAAAAAAAAAAAAAAAAAAAAAAAAAAA	1299866	10.3061	poly(A)	CGAGCTCTTCCGATCTTTTTTTTTTTTTTTTTTTTT	1038908	8.23703	Illumina Adapter 2
SRX286991	SRR868871	Atypia/EN	AAAAAAAAAAAAAAAAAAAAAAAAAAAAAAAAAAAA	2746209	17	poly(A)	CGAGCTCTTCCGATCTTTTTTTTTTTTTTTTTTTTT	1313736	8	Illumina Adapter 2
SRX286992	SRR868872	Normal	CGAGCTCTTCCGATCTTTTTTTTTTTTTTTTTTTTT	1552261	7.35178	Illumina Adapter 2	CTCTTCCGATCTTTTTTTTTTTTTTTTTTTTTTTTT	504350	2.38869	Illumina Adapter 2
SRX286993	SRR868873	DCIS	AAAAAAAAAAAAAAAAAAAAAAAAAAAAAAAAAAAA	7766230	29.9365	poly(A)	CGAGCTCTTCCGATCTTTTTTTTTTTTTTTTTTTTT	2423014	9.33998	Illumina Adapter 2
SRX286994	SRR868874	IDC	CGAGCTCTTCCGATCTTTTTTTTTTTTTTTTTTTTT	1386485	8.01513	Illumina Adapter 2	AAAAAAAAAAAAAAAAAAAAAAAAAAAAAAAAAAAA	1319481	7.62779	poly(A)
SRX286995	SRR868875	Atypia/EN	AAAAAAAAAAAAAAAAAAAAAAAAAAAAAAAAAAAA	1941044	17	poly(A)	CGAGCTCTTCCGATCTTTTTTTTTTTTTTTTTTTTT	1100485	10	Illumina Adapter 2
SRX286996	SRR868876	Normal	CGAGCTCTTCCGATCTTTTTTTTTTTTTTTTTTTTT	2522585	8	Illumina Adapter 2	AAAAAAAAAAAAAAAAAAAAAAAAAAAAAAAAAAAA	2016995	6	poly(A)
SRX286997	SRR868877	IDC	CGAGCTCTTCCGATCTTTTTTTTTTTTTTTTTTTTT	1837659	7.40857	Illumina Adapter 2	AAAAAAAAAAAAAAAAAAAAAAAAAAAAAAAAAAAA	1611814	6.49807	poly(A)
SRX286998	SRR868878	Normal	CGAGCTCTTCCGATCTTTTTTTTTTTTTTTTTTTTT	1743704	7	Illumina Adapter 2	AAAAAAAAAAAAAAAAAAAAAAAAAAAAAAAAAAAA	1538796	6	poly(A)
SRX286999	SRR868879	IDC	AAAAAAAAAAAAAAAAAAAAAAAAAAAAAAAAAAAA	1582431	9.35264	poly(A)	CGAGCTCTTCCGATCTTTTTTTTTTTTTTTTTTTTT	1216180	7.18799	Illumina Adapter 2
SRX287000	SRR868880	IDC	AAAAAAAAAAAAAAAAAAAAAAAAAAAAAAAAAAAA	7377323	21.0441	poly(A)	CTTTTTTTTTTTTTTTTTTTTTTTTTTTTTTTTTTT	1520851	4.33828	Illumina Adapter 2
SRX287001	SRR868881	Normal	AAAAAAAAAAAAAAAAAAAAAAAAAAAAAAAAAAAA	11751861	38	poly(A)	CGGCATACGAGCTCTTCCGATCTTTTTTTTTTTTTT	1250076	4	Illumina Adapter 2
SRX287002	SRR868882	Atypia/EN	AAAAAAAAAAAAAAAAAAAAAAAAAAAAAAAAAAAA	5285979	19	poly(A)	CGGCATACGAGCTCTTCCGATCTTTTTTTTTTTTTT	1267379	4	Illumina Adapter 2
SRX287003	SRR868883	Atypia/EN	AAAAAAAAAAAAAAAAAAAAAAAAAAAAAAAAAAAA	7274483	24	poly(A)	CGGCATACGAGCTCTTCCGATCTTTTTTTTTTTTTT	1637453	5	Illumina Adapter 2
SRX287004	SRR868884	Normal	AAAAAAAAAAAAAAAAAAAAAAAAAAAAAAAAAAAA	5512524	17	poly(A)	CTTTTTTTTTTTTTTTTTTTTTTTTTTTTTTTTTTT	2257144	7	Illumina Adapter 2
SRX287005	SRR868885	Atypia/EN	AAAAAAAAAAAAAAAAAAAAAAAAAAAAAAAAAAAA	9373896	34	poly(A)	CGGCATACGAGCTCTTCCGATCTTTTTTTTTTTTTT	2826701	10	Illumina Adapter 2
