# Supplementary material for: Aligning the Aligners: Comparison of RNA Sequencing Data Alignment and Gene Expression Quantification Tools for Clinical Breast Cancer Research
Source: Preprints.org preprint supplement (doi:10.20944/preprints201903.0036.v1), 2019-03-04
Supplement: Supplementary file 2 [file Supplemental Table 2.xlsx]

## Sheet: STAR_DESeq2_up_Normal_vs_Atypia
Gene ID	log2FC (NvA)	p-value
EEPD1	1.11629	0.000189047
CCL28	1.55853	0.00116165
RP11-93B14.5	2.35241	0.00125878
NEURL3	1.77116	0.00125878
RSPO1	1.69933	0.00125878
RASL10A	1.56544	0.00125878
HAPLN3	1.36081	0.00125878
KIT	1.33758	0.00125878
RPL10	1.29149	0.00125878
ETV6	0.761849	0.00132458
FAM57A	0.899389	0.00137913
RP11-292F22.7	2.22303	0.00144467
MYL3	1.72774	0.00180537
CHRM1	1.85352	0.00191029
EEF1B2	0.846998	0.0021216
PIGR	2.15081	0.00255018
IGLC6	1.94126	0.00255018
ELF5	1.66391	0.00255018
RASGEF1C	1.57892	0.00255018
HSD11B2	1.25856	0.00255018
TCF7L1	0.908051	0.00255018
CSF1	0.711232	0.00271903
C10orf90	1.86392	0.00283212
NACA	0.657077	0.00371114
OLFML2A	0.930172	0.00380345
SIRPA	0.954858	0.00382082
RPS20	0.705645	0.0039074
NMB	1.2133	0.00466473
FOXC1	1.29621	0.00470851
PPP1R1A	1.4561	0.00524083
CHI3L2	1.32421	0.00524083
GGTA1P	1.01997	0.00528553
CX3CL1	1.12689	0.00537968
SOX8	1.20984	0.00539814
PADI2	1.34446	0.00542137
ASIC1	1.08639	0.00542137
CCDC42B	1.99611	0.00571335
KCNQ4	1.2661	0.00628408
C2orf82	1.62627	0.00631793
AIF1L	1.16347	0.00631793
IGLL3P	1.94893	0.0065688
CTC-484M2.1	1.39648	0.00729354
CENPV	0.891545	0.00729354
MMRN1	1.34662	0.00769489
SLC34A2	1.47411	0.00837331
MYEOV	1.90873	0.00929952
NDRG2	0.835299	0.010071
PHLDA1	0.927147	0.0106926
AC016995.3	1.87275	0.0111745
USP2	0.875947	0.0112677
TRIM2	0.786711	0.0112677
LYAR	0.674464	0.0112677
AMN	1.46113	0.0122807
AC097724.3	1.39028	0.0122807
SOX7	1.00542	0.0122807
RPL30	0.741919	0.0122807
RP11-566J3.4	2.25561	0.0128992
LINC00338	1.16277	0.0136507
ASPA	1.05659	0.0136507
ANKS6	0.777806	0.0136507
HSPB6	1.43988	0.0136979
PIM1	1.12945	0.0138082
IGLC3	1.5288	0.0139304
ADAMTS12	0.868766	0.0139304
RPL3P4	1.1667	0.0141608
SLC13A2	1.48193	0.0142631
TTYH1	1.45162	0.0142631
CASC8	2.15991	0.0142828
CNTFR	1.19151	0.0143263
FOSL1	1.36166	0.0152651
FOLR1	1.78601	0.0162589
C11orf16	2.26745	0.0163662
FAM3D	1.63569	0.0163662
RPSA	0.849086	0.0166116
GLIPR2	0.768227	0.016965
IGKC	1.4305	0.0174708
ADM	1.17577	0.0174708
LOXL4	1.164	0.0174708
RPLP0	0.744463	0.0184613
NTF3	1.45456	0.0185386
RPS21	1.12448	0.0186588
RP3-399J4.2	0.77822	0.0186588
FAM211A-AS1	0.823883	0.0194262
RPL27	0.66907	0.0195242
GALNT1	0.596049	0.0196211
ACSS2	0.770269	0.0196795
TMEM213	1.7333	0.0198286
IGLC2	1.65461	0.0204812
RP11-875O11.1	1.3477	0.0205083
FABP3	1.98587	0.0206117
NIPAL1	1.1306	0.0206117
EIF3F	0.640093	0.0206117
RPS6	0.711121	0.0211369
ZNF343	0.671657	0.0213308
DESI1	0.560537	0.0213308
ZNF683	1.14648	0.0217157
KCNN4	1.05433	0.0228426
MMP7	1.2622	0.0236456
SDK1	0.863672	0.0237774
ETV3L	1.70159	0.0240237
RP11-469H8.6	1.78232	0.0242207
MT-ATP8	1.10371	0.0242207
BDKRB2	0.911255	0.0242207
CD14	0.943146	0.0243169
EMILIN2	0.871956	0.0243169
PI3	1.60463	0.0244049
CDC14B	0.96854	0.0248272
TGIF2	0.807482	0.0252417
AC093822.1	2.88824	0.025833
CTD-3094K11.1	1.58036	0.025833
LYVE1	1.16118	0.025833
TPD52L1	0.796944	0.025833
OPTN	0.563503	0.0265442
PLA2R1	0.773268	0.0266065
ADORA1	1.17417	0.0266421
CRYAB	0.901592	0.0268402
TNFAIP2	0.822784	0.0268402
IGLV2-14	2.7728	0.0270664
SCARA3	1.04473	0.0271178
HS3ST4	1.80179	0.0272957
POLR1E	0.814065	0.02747
B3GNT3	1.46088	0.0285568
APCDD1L	1.43542	0.0285568
IGLL5	1.34359	0.0285568
CD209	1.16567	0.0285568
AL035610.1	1.10381	0.0285568
TNFRSF1B	0.739316	0.0285568
CCL21	1.20415	0.0286974
RP11-211G23.2	1.67814	0.0288905
PODXL	0.625896	0.0300971
DPT	1.12557	0.0303013
LINC00842	1.50446	0.0303725
BARX2	1.1062	0.0303725
AC018470.4	0.959414	0.0310534
EPHA2	0.757477	0.0315329
PPP1R12B	0.678301	0.0315868
KRT15	1.5434	0.0317189
MUC5B	1.50391	0.031903
MAFF	0.858509	0.0319353
SNHG6	0.60714	0.0319353
CIDEC	1.74579	0.0321099
IGLV6-57	1.56695	0.0329085
GPR55	0.971443	0.0329085
CEBPB	0.708584	0.0329085
PDZK1IP1	1.448	0.0337782
KLF2	0.919153	0.0337782
RASAL1	1.28655	0.0341028
RPL39	1.09987	0.0341825
CORO2B	0.88838	0.0341825
LINC01111	1.45365	0.0344076
GLTSCR2	0.662347	0.0344733
GSN	0.542113	0.0344733
CXCL12	0.826325	0.0346007
FZD9	1.17964	0.0348382
IGLJ3	2.01266	0.0353004
FAM13A	0.689509	0.0358068
ATL2	0.57708	0.035831
CBLN4	1.70406	0.036518
MAF	0.60822	0.036518
MFAP3L	0.934943	0.0368109
ANP32B	0.689282	0.0370033
HDLBP	0.609123	0.0370033
RBP7	1.00856	0.0370888
MRAS	0.689218	0.0370888
ROPN1B	1.44422	0.0372275
RGCC	0.840449	0.0375796
CARD16	0.7443	0.0375796
CELF5	1.10555	0.0377111
MYC	0.819388	0.0377111
FZD7	0.739716	0.0379802
G0S2	1.41608	0.038161
GPC3	0.809663	0.0381682
MAP2K3	0.796984	0.0381682
IGLV1-40	1.77339	0.0383575
GABRP	1.20075	0.0395518
PDE9A	0.879548	0.0401162
INSR	0.523526	0.0402965
MPZ	0.778322	0.0406673
COL27A1	0.740431	0.0408741
RPL35A	0.802042	0.0422662
PALD1	0.842688	0.0423787
APOC3	3.00289	0.043031
MYL4	1.54695	0.043054
CCL22	0.989434	0.0437083
CPM	0.781996	0.0446822
EPB41L4A-AS1	0.633858	0.0446822
RPS29	1.0257	0.0447587
RPS18	1.41866	0.0453167
AC096579.7	1.40261	0.0453167
RPL12	0.929419	0.0453167
IL15RA	0.808903	0.0454724
RP11-365F18.1	1.32038	0.0461178
HADH	0.565783	0.0464894
IRX6	1.30177	0.046747
CAMKK1	0.622743	0.046747
RPL13AP25	1.11017	0.0473885
TRBC2	0.983083	0.0473885
CHKA	0.641162	0.0473885
IGHA2	1.84695	0.0474652
POLR1C	0.551357	0.0474652
IGLV2-8	1.84115	0.0476082
PLXNA4	0.850062	0.0476082
GFRA2	0.756691	0.0476082
IGJ	1.25125	0.0478253
ALDOC	1.41233	0.0485301
TLR2	0.887674	0.0485301
HOXA4	1.15064	0.0486191
SH3YL1	0.662684	0.0499315

## Sheet: STAR_edgeR_up_Normal_vs_Atypia
Gene ID	log2FC (NvA)	p-value
APOA1	2.80889	0.000618809
HLA-DRB5	2.68308	0.00433584
RP11-93B14.5	2.34235	5.39308e-06
CSN3	2.32554	0.00159947
CASC8	2.20043	8.92791e-05
RP11-292F22.7	2.19948	6.66906e-06
IGLC6	2.13939	3.77021e-05
PIGR	2.13849	4.04024e-05
SERPINA6	2.12831	0.0171344
MYEOV	1.91729	0.000154673
AC016995.3	1.89276	5.9203e-05
CHRM1	1.87707	2.73245e-05
IGHA2	1.82057	0.0280602
MYL3	1.80382	2.57308e-05
FOLR1	1.80242	0.000257925
RP11-469H8.6	1.7952	0.000363617
NEURL3	1.79281	1.10925e-05
CIDEC	1.77817	0.000987174
CA2	1.77611	0.0057187
TMEM213	1.77563	0.000280585
DMBT1	1.7716	0.00452955
ETV3L	1.75661	0.000190599
RSPO1	1.72672	1.24235e-05
RP11-211G23.2	1.71934	0.000720211
IGLC2	1.68131	0.000669145
ELF5	1.67962	5.19253e-05
FAM3D	1.67317	0.000251222
PI3	1.67287	0.000397836
C2orf82	1.63689	0.00027738
RASGEF1C	1.6161	2.603e-05
RASL10A	1.61121	1.13516e-05
IGLV6-57	1.57413	0.00109961
KRT15	1.55627	0.00159176
CCL28	1.55434	9.07926e-06
IGLC3	1.54618	0.000455889
LINC00842	1.54275	0.0007103
AMN	1.53413	0.000250759
MUC5B	1.52222	0.00143949
SLC13A2	1.50511	0.000448151
LINC01111	1.49274	0.00182664
B3GNT3	1.48968	0.00113465
AQP5	1.48856	0.00473629
SLC34A2	1.48786	0.000215017
APCDD1L-AS1	1.47916	0.0040592
TTYH1	1.47899	0.000405094
IGHD	1.4752	0.0299146
AC096579.7	1.47067	0.00180895
PPP1R1A	1.46864	0.000151354
COL6A6	1.4564	0.00195638
PDZK1IP1	1.4533	0.00138138
APCDD1L	1.45145	0.00125643
AC097724.3	1.44736	0.000198103
HSPB6	1.44461	0.000574545
IL1R2	1.44098	0.00292082
RBP4	1.43938	0.00906263
DES	1.43633	0.00247604
G0S2	1.42949	0.00219098
RPS18	1.42915	0.0025644
IGKC	1.42667	0.000957617
MMRN1	1.42635	0.000185607
FAM150B	1.42542	0.00141345
SNORA65	1.41867	0.015888
AOC1	1.39328	0.00981313
PENK	1.39086	0.0295294
ROPN1B	1.38928	0.00106308
IGLL5	1.37542	0.00100562
HAPLN3	1.36671	1.59132e-05
FOSL1	1.36441	0.000477041
RP11-365F18.1	1.3604	0.00211316
RPS25	1.35888	0.00305273
CTC-484M2.1	1.35077	0.000143286
PADI2	1.34083	0.000147091
IL6	1.337	0.0139223
NCCRP1	1.33648	0.0302971
IRX6	1.33332	0.0022014
KIT	1.33219	1.48467e-05
SCARNA11	1.33024	0.031897
RASAL1	1.31824	0.00118415
KCNQ4	1.31652	0.000134254
CHI3L2	1.31586	0.000137608
FOXC1	1.29618	0.000108837
RPL10	1.28995	1.11496e-05
HSD11B2	1.28749	3.67578e-05
SLPI	1.27935	0.0035979
ATP13A5	1.27931	0.0112733
IGJ	1.25892	0.00347778
PLIN1	1.23414	0.00968614
CCL21	1.22991	0.00117932
SOX8	1.22945	7.82325e-05
MMP7	1.22455	0.00108051
NMB	1.22448	9.073e-05
CRABP1	1.22365	0.0114576
LOXL4	1.21714	0.000414591
CXCL2	1.21452	0.0139957
CNTFR	1.21222	0.000353576
SCGB1D2	1.21172	0.0454015
SLC5A1	1.20117	0.00261016
TUSC5	1.19856	0.0153849
GABRP	1.19844	0.00227623
CD209	1.19422	0.0011557
ADORA1	1.18563	0.000909195
CALB2	1.18555	0.00388168
FDCSP	1.18527	0.0454456
LYVE1	1.18407	0.00106419
AIF1L	1.18243	9.48622e-05
ASPA	1.18015	0.000429918
RPL3P4	1.17237	0.000334139
ADM	1.16518	0.000669386
CES3	1.1575	0.0158611
ZNF683	1.15414	0.0033242
FOXI1	1.15359	0.00970907
PIM1	1.1467	0.000373795
LCN2	1.14367	0.0113853
IRF4	1.13824	0.00493289
AC074289.1	1.13775	0.00260777
CX3CL1	1.13698	9.57668e-05
DPT	1.13177	0.00147858
LINC00338	1.12902	0.000506401
CELF5	1.12801	0.00121709
RPS21	1.12564	0.000625744
EEPD1	1.12234	1.33922e-06
XPNPEP2	1.11642	0.00237425
RPS7	1.11484	0.00573558
PHGDH	1.114	0.00296873
ASIC1	1.10685	7.03081e-05
TNNC1	1.09936	0.00307374
TGFA	1.09883	0.00780743
MT-ATP8	1.09566	0.00100978
LTF	1.0943	0.00801173
SCGB3A1	1.09343	0.0122155
BARX2	1.09295	0.00126032
RPL39	1.09101	0.00189516
FOLR2	1.08889	0.00523361
MT1M	1.08419	0.00503193
ADIPOQ	1.08185	0.0397071
FTH1	1.08165	0.0133368
SEZ6	1.08063	0.0127672
KCNN4	1.07915	0.000524614
SAA2	1.07422	0.00845328
IL1B	1.07282	0.0398679
MATN4	1.0699	0.00399548
SLC6A14	1.06978	0.0219192
GPD1	1.06726	0.0236498
RP5-857K21.11	1.06022	0.0143629
HLA-B	1.05389	0.0108337
SCARA3	1.04777	0.00104331
EGR1	1.04456	0.00512685
TRBC2	1.04034	0.00192129
RNASE1	1.03847	0.00736193
MT1A	1.03369	0.0258819
PLEKHB1	1.03164	0.00483954
MESP1	1.0264	0.0124279
RPS29	1.0252	0.00244549
LINC00640	1.02371	0.00583431
SOX7	1.02331	0.000395074
SCARNA17	1.0183	0.00439306
GGTA1P	1.01793	9.057e-05
C11orf96	1.01396	0.00997224
IRX1	1.01183	0.00351555
EGF	1.01133	0.0248378
GPR55	1.00756	0.00200273
KLK10	1.00688	0.0062893
EIF3A	1.0066	0.00454417
RP6-99M1.2	1.0063	0.032483
KIAA0125	1.00585	0.0160792
CCL22	1.00527	0.00174778
ADH1B	1.00502	0.0205631
RBP7	1.00374	0.00186305
GFRA3	1.00298	0.0381494
AQP7	1.00039	0.0122839
GYG2	1.0003	0.0113112
RPL37	0.999637	0.00313223
TRAC	0.992621	0.00607955
LILRB5	0.989056	0.00261186
C19orf80	0.980215	0.0100061
ARRDC3	0.978877	0.00407475
RP1-159A19.3	0.978313	0.0471434
SOX10	0.978096	0.01233
TREM1	0.975614	0.0271962
MT-ND1	0.974156	0.00694334
CCL2	0.967102	0.041839
CDKN1A	0.961868	0.0109075
GPR124	0.960759	0.00472644
SIRPA	0.959525	5.10714e-05
YBX1	0.956665	0.0103473
PROX1	0.954151	0.00920785
CD14	0.947027	0.000698928
PLIN4	0.940507	0.0379234
PLLP	0.939423	0.00835155
TMEM71	0.938408	0.00752466
RPL12	0.937831	0.00187693
CFD	0.937508	0.00327383
RASL10B	0.935599	0.00885445
HIST2H2AC	0.93298	0.0304627
MEI1	0.931037	0.00854511
CD3D	0.929659	0.00846475
MFAP3L	0.925967	0.00151555
AL928768.3	0.925545	0.0265479
PHLDA1	0.923762	0.000273694
OLFML2A	0.923172	5.45221e-05
ZFP36	0.923109	0.00933918
TIMP4	0.922268	0.00376352
KLF2	0.920433	0.0013603
RERGL	0.919092	0.0318275
RP11-492E3.2	0.918887	0.00866909
CD180	0.918816	0.00219471
LCK	0.916917	0.02414
CENPV	0.914761	0.000130345
EGR2	0.914659	0.0271434
CORO2B	0.914638	0.00112679
TCF7L1	0.912435	3.13736e-05
CRYAB	0.912385	0.000821842
AGT	0.911474	0.0241258
USP2	0.911229	0.000274019
RPL6	0.908813	0.013952
BDKRB2	0.905748	0.000846474
APBB1IP	0.903807	0.00332372
CPAMD8	0.902346	0.00470556
FAM107A	0.902061	0.0111733
PROM1	0.899745	0.0193361
CDC14B	0.899662	0.00116554
ANKRD36BP2	0.899266	0.0428448
CCL19	0.898883	0.0232783
NECAB2	0.89777	0.00793361
RPL10A	0.896956	0.00743309
DAPP1	0.895662	0.0042281
PDE9A	0.894428	0.00118514
DERL3	0.893678	0.00544357
RP11-126L15.4	0.892604	0.0109942
B3GALT5	0.892377	0.00806561
LGR6	0.891652	0.00451123
RPS28	0.888152	0.0375483
BCL11A	0.887521	0.00432306
EMILIN2	0.885855	0.000600738
PLXNA4	0.884997	0.00201385
CXCR3	0.883567	0.0152005
IGLL1	0.883283	0.031466
CDCA7L	0.882938	0.00456685
RPL13A	0.880855	0.00469103
FAM89A	0.880633	0.0191138
CD79A	0.880188	0.0286699
Z83851.1	0.877315	0.00556587
GPR114	0.872775	0.00365416
CD2	0.869092	0.00817039
MAFF	0.86885	0.000978386
FAM57A	0.865901	1.71694e-05
FLNC	0.865724	0.00274108
RPL15P3	0.864604	0.0163385
SLAMF7	0.864267	0.0163599
SDK1	0.862959	0.000739234
TLR2	0.86118	0.00379536
ID4	0.859681	0.00420852
FPR1	0.858585	0.0221836
ADAMTS12	0.858183	0.000326808
SLC17A7	0.857212	0.0239574
NDRG2	0.856211	0.000116058
WNT10A	0.856036	0.0154856
KANK4	0.854948	0.004585
SLC2A4	0.854871	0.0160803
APLN	0.854859	0.0119994
SOCS3	0.854072	0.0338415
GPR97	0.853781	0.031643
KCNIP2	0.853657	0.0263265
CITED4	0.853399	0.0116491
CPE	0.853108	0.0160598
ANPEP	0.852519	0.00696095
RPSA	0.850722	0.000394192
MMP19	0.843099	0.00571662
NR4A1	0.84261	0.0314229
RPL18A	0.841537	0.00658398
ACTR3B	0.839528	0.00301249
CD4	0.838229	0.00905306
IGHA1	0.83758	0.0388923
SOCS1	0.837236	0.00777594
SLC7A7	0.836771	0.0116288
TMEM158	0.836638	0.00482973
RAB36	0.834322	0.00463328
IL15RA	0.833776	0.00192681
TMEM52	0.833149	0.00358312
EMX2OS	0.832797	0.0130433
RPL13	0.832375	0.00535184
GPC3	0.830932	0.0019329
PALD1	0.830893	0.00163374
POLR1E	0.829924	0.000499828
CD1C	0.829607	0.0288101
AC092580.4	0.829242	0.0205062
IER2	0.829138	0.00853644
EEF1B2	0.828444	2.34441e-05
SERPINF1	0.823235	0.0101199
PKP1	0.822767	0.0221493
TNNT2	0.822075	0.03972
MZB1	0.820369	0.0136975
TAGLN	0.819649	0.00664818
RBPMS2	0.818963	0.00918267
CXCL12	0.818201	0.00181727
LGALS2	0.817801	0.0262602
TNFAIP2	0.817427	0.00112311
ETV7	0.81564	0.0370283
RGCC	0.813696	0.00241498
SEL1L3	0.813301	0.00464062
RPL37A	0.812113	0.0235792
FAM211A-AS1	0.810772	0.000475026
IL6R	0.809268	0.010254
PID1	0.80816	0.0152478
TMPRSS2	0.806403	0.0103766
LY75	0.805307	0.00934719
KIAA1045	0.805144	0.00717306
GMPR	0.804965	0.0121471
MYC	0.804847	0.00212767
PMEL	0.804516	0.0270036
CGREF1	0.803655	0.0124922
MAP2K3	0.803059	0.00110103
RPL35A	0.801923	0.0018034
TFCP2L1	0.801864	0.0194393
ANKS6	0.799816	0.000396851
CNTN1	0.799735	0.00814713
CPM	0.799515	0.00174289
TGIF2	0.797651	0.00058198
KRTCAP3	0.795977	0.00576718
PSMB9	0.795958	0.0401005
MEIS1	0.795834	0.0477371
LINC00341	0.793996	0.0153131
TMEM37	0.791492	0.00964497
NGEF	0.79108	0.0171982
EYA2	0.790806	0.00644793
PRIMA1	0.788606	0.0325067
RPL41	0.787863	0.00583752
APBA2	0.785677	0.0137656
TRIM2	0.785154	0.000251988
TENM2	0.783448	0.0279948
SRPX	0.78319	0.00534639
RNF112	0.781659	0.00839894
SLC25A27	0.780532	0.0267119
CYR61	0.78016	0.00564113
HCLS1	0.779503	0.00288467
MPZ	0.7768	0.0014714
ACSS2	0.776278	0.000525714
RPL4	0.775708	0.0196941
GLIPR2	0.774557	0.000371073
EPHA2	0.773161	0.00085038
TPD52L1	0.771665	0.000941743
GPBAR1	0.771359	0.0227324
MEIS2	0.769547	0.00541973
GFRA2	0.769414	0.00206099
CD74	0.76874	0.00370096
C3orf58	0.765972	0.00495434
PLA2R1	0.764047	0.00109202
RP11-51O6.1	0.763857	0.0158882
CYP11A1	0.763762	0.00460414
CHRDL1	0.763643	0.0141622
ZBP1	0.762957	0.0262088
RP11-154D6.1	0.761989	0.0164415
TNFRSF11A	0.761558	0.00677428
PAK3	0.760378	0.0100061
ADCYAP1R1	0.760208	0.00710903
RPLP1	0.759736	0.00502897
CARD16	0.757845	0.00121943
TMEM132C	0.757543	0.0122356
AOC3	0.757238	0.00978571
NID1	0.757171	0.00485958
C3	0.756377	0.00275014
JUNB	0.756258	0.0176472
RP11-467I17.1	0.755902	0.0285651
MAP7D3	0.755533	0.0266121
SCN3B	0.754839	0.0236539
RPL13P12	0.754817	0.0103301
AKR1C3	0.754261	0.0171364
LYN	0.753594	0.00467977
ETV6	0.751327	1.4342e-05
RPLP2	0.750559	0.00572355
COL27A1	0.747478	0.00150015
TNFRSF1B	0.745752	0.000704038
PRR4	0.745242	0.00387996
TUBA4A	0.744254	0.00473363
RPS24	0.742843	0.0103899
FBLN1	0.742036	0.0106661
RP3-399J4.2	0.741552	0.000430778
EBF1	0.74069	0.0124763
TOMM7	0.736889	0.00709911
NRN1	0.736848	0.0253985
KRT80	0.735843	0.0492411
IL1RL2	0.734824	0.00782615
ZNF133	0.734718	0.00503912
PLEKHF1	0.734279	0.00907389
SP140L	0.734215	0.022459
SOX9	0.733406	0.0079809
EDN1	0.732481	0.00235147
RPLP0	0.731556	0.000516427
RP13-93L13.2	0.731525	0.0441091
TSPAN33	0.731273	0.0074499
PIM2	0.73026	0.00483828
LEPR	0.729194	0.0455224
RP11-22B23.1	0.728426	0.0480163
APCDD1	0.727984	0.00707952
TSPAN18	0.72719	0.00409116
CCNB1IP1	0.726673	0.00516318
CSRNP3	0.725882	0.0308441
SNHG7	0.725296	0.0304069
RP11-254F7.2	0.724134	0.00865149
RPL30	0.723714	0.000269014
LHFPL2	0.721158	0.00550494
ADAMTS1	0.720256	0.0126854
CSF1	0.720243	4.6996e-05
CD8B	0.720182	0.0206646
BCL6B	0.719857	0.025428
CD3E	0.719586	0.0295164
FZD7	0.719522	0.00204119
PDE4B	0.719458	0.0227992
TRIB1	0.718619	0.0187666
CTF1	0.717751	0.0180073
EIF3D	0.716991	0.00575032
SNTB1	0.714207	0.0188298
NOG	0.713436	0.0155143
PLTP	0.712892	0.0213769
PHB2	0.712461	0.00673835
FSCN1	0.712281	0.0101703
FMO1	0.711465	0.0114561
CEBPB	0.710187	0.00110552
CD27	0.709944	0.0197405
RP11-385F5.5	0.709572	0.0287354
GIMAP4	0.706031	0.00776264
SELENBP1	0.705921	0.00980892
IMPDH2	0.705354	0.0178641
SNAI1	0.704255	0.028989
LIF	0.703139	0.0452907
C1QBP	0.703126	0.00486974
FAM13A	0.701496	0.000981757
THBD	0.699703	0.0291204
MYL9	0.696385	0.0472006
SOX17	0.695297	0.0192161
RASD1	0.69334	0.0326065
RPS20	0.693111	5.90516e-05
RPS6	0.692863	0.000673329
MRAS	0.692647	0.00209161
GALNT16	0.692517	0.00771207
METTL17	0.692145	0.0198163
C1orf210	0.691523	0.0372285
RPS8	0.690611	0.0235215
VSIG4	0.690506	0.0234727
TRIM52-AS1	0.690157	0.0404962
SFRP1	0.689801	0.042527
MARK1	0.689557	0.0455671
KLF15	0.688838	0.0362074
RPL3	0.688836	0.0110617
ICAM1	0.688442	0.0427972
PLEKHG4	0.686661	0.00232509
MPEG1	0.685577	0.00930089
PTRHD1	0.685124	0.00722247
TNFAIP8L3	0.684388	0.0150459
RSAD2	0.683776	0.0372357
PPP1R12B	0.683428	0.0011153
FNDC5	0.682991	0.010369
GNLY	0.682353	0.02298
SLC25A28	0.682139	0.0192237
TSPAN32	0.681337	0.0457876
MX2	0.68089	0.00483328
RP11-489E7.4	0.680231	0.0281378
SLC2A3	0.680187	0.0267512
EHF	0.678776	0.0386386
RPS4X	0.678377	0.00995223
LYAR	0.675534	0.000170169
C2orf88	0.674417	0.0441278
GLTSCR2	0.673965	0.000759078
FHIT	0.673683	0.022651
S100A6	0.671765	0.0299487
TNFAIP3	0.670771	0.00321068
PPARG	0.670485	0.0453819
SUPT3H	0.668686	0.0134589
RBL1	0.66784	0.00224596
NPIPP1	0.667119	0.0273306
CCL5	0.667015	0.0201185
CHKA	0.666674	0.00139199
ANP32B	0.665935	0.00156499
HOTAIRM1	0.665738	0.0245241
HIRIP3	0.665298	0.00677808
RASL12	0.664074	0.0074405
ARHGAP26	0.663471	0.00702085
ZNF333	0.663402	0.0104196
TXNIP	0.663312	0.00574872
CD36	0.663076	0.0475465
CWF19L2	0.661998	0.00592245
FBL	0.661899	0.00898187
DKC1	0.660393	0.0158086
TSGA10	0.659703	0.0182675
RPS19	0.659401	0.0078823
RPL27	0.659081	0.000568205
SH3YL1	0.658397	0.0021272
TTC22	0.65806	0.0272658
CEACAM19	0.656498	0.0289076
RPS15A	0.654916	0.0433364
TNS1	0.653849	0.0442156
EIF3K	0.653431	0.00845734
FAM171A1	0.652439	0.0372941
RSL1D1	0.652264	0.00495403
DBI	0.651609	0.0176754
GAPDH	0.650811	0.0405004
TCF15	0.650625	0.0294986
C17orf67	0.649123	0.0273472
HARS	0.648499	0.00444498
ZNF343	0.648373	0.000609614
NACA	0.646324	7.99105e-05
BTN3A1	0.645073	0.00441826
PGM5	0.64421	0.0109598
RILPL2	0.643923	0.00292916
RP11-707M3.3	0.642378	0.00747458
RP11-229P13.20	0.642158	0.0446141
DCLK2	0.641275	0.014427
SOD2	0.640917	0.0400384
CAMKK1	0.640009	0.00173532
HMGA1	0.639838	0.010745
UBQLN4	0.639815	0.0379335
RGMA	0.639657	0.0186828
EVA1C	0.638851	0.00778118
HSP90AB1	0.63793	0.00576456
AC007969.5	0.637694	0.0405394
RPL38	0.63767	0.00905124
IL2RG	0.637643	0.0444252
EPHB3	0.6375	0.0219918
RUNX2	0.637168	0.0139431
MT-TP	0.637083	0.0370476
RPS13	0.637063	0.00439372
RCCD1	0.636579	0.00730678
KDR	0.635705	0.0137986
TMEM173	0.635613	0.009451
RPLP0P2	0.635242	0.0119868
IFI27L2	0.635056	0.0355329
CCDC71L	0.632706	0.0340694
EGFR	0.632585	0.0185324
TRIM21	0.632177	0.0140989
SLIT3	0.632041	0.00345733
PALMD	0.632	0.0132007
RPS5	0.631367	0.0182582
IMPA2	0.6304	0.0147487
EPB41L4A-AS1	0.629766	0.00251317
MFN2	0.628452	0.0147097
PLAC9	0.626489	0.0241888
GLI2	0.626382	0.0337575
CUBN	0.625576	0.0319046
ANGPTL4	0.623973	0.0192762
PXN	0.622785	0.00814653
PYROXD2	0.621826	0.0290718
ALPL	0.620488	0.0262951
RPL9	0.618875	0.0311296
GOLGA7B	0.618837	0.0352517
RPL7A	0.618564	0.00390854
KLF5	0.618552	0.0273977
WAS	0.618101	0.0122493
MTURN	0.617734	0.00335657
CTSS	0.617566	0.0250605
PODXL	0.615566	0.00132636
SET	0.614521	0.0199869
EIF3F	0.613879	0.000525223
PLEKHS1	0.613068	0.0204683
C1R	0.612989	0.00532554
ADA	0.612896	0.0141231
POLR3D	0.611656	0.0146026
CTD-2020K17.1	0.611579	0.0331703
CTSF	0.611266	0.0131759
ACSL5	0.610966	0.00803357
RPL37AP1	0.61007	0.0443021
RPS7P1	0.60867	0.0482696
STEAP3	0.608659	0.0128924
SP2	0.608358	0.0156036
NDUFAF2	0.60789	0.0241687
RPS16	0.606998	0.0267243
HDLBP	0.606913	0.00131124
ECSCR	0.606894	0.0154614
EDNRB	0.606878	0.0432477
SELPLG	0.606728	0.0372694
FLT4	0.606284	0.00701875
PLB1	0.60511	0.0444912
VCAM1	0.604672	0.0442197
FAM217B	0.603026	0.00548163
KCNN3	0.602917	0.0389391
SLC43A3	0.601532	0.00537848
MFNG	0.601026	0.0159915
AMOTL2	0.600841	0.00554494
PNRC1	0.600539	0.00476415
MAF	0.599981	0.00146293
MT-ND4L	0.599828	0.00893455
ST3GAL6	0.599321	0.0302808
CMTM7	0.598318	0.00600903
PLK3	0.59793	0.0125284
ARHGEF40	0.597789	0.00503916
VENTX	0.59749	0.0266116
MAP1A	0.59652	0.0202929
MSX1	0.595153	0.0367918
CDKN1C	0.595134	0.0155489
DMD	0.594135	0.0163785
EEF2K	0.592472	0.00798846
FTL	0.591127	0.0462963
SNHG6	0.589892	0.00149073
GPHN	0.589244	0.0087323
RPUSD4	0.5892	0.00578338
CNTNAP1	0.588628	0.0137388
XPNPEP1	0.588525	0.0140888
ZNF32	0.588468	0.0257279
ODC1	0.588169	0.0176482
NUP214	0.587705	0.00203815
RPL31	0.587609	0.00925011
TAX1BP3	0.587285	0.0238054
TRAP1	0.58625	0.0170817
GULP1	0.586223	0.0479129
TCF7L2	0.58545	0.00539661
RUNX3	0.584734	0.0286047
ST8SIA1	0.583545	0.022674
CYB5R3	0.583098	0.0309435
FOXO1	0.582902	0.00680686
ATL2	0.582381	0.00130925
FERMT3	0.57962	0.0257132
SAPCD2	0.578565	0.0381494
LINC00667	0.578406	0.00364129
GALNT1	0.577981	0.000459894
SEMA6A	0.576816	0.00563549
PEAR1	0.576416	0.0377897
HADH	0.575767	0.00179533
TLN2	0.575083	0.00857885
ELL2	0.57471	0.0268942
ZNF275	0.573766	0.0393639
UCK2	0.573716	0.00593217
FOXN3	0.573683	0.004372
MRPL52	0.573149	0.0412584
H3F3B	0.573108	0.00618177
RP11-137H2.6	0.573022	0.0354502
APOL3	0.572275	0.0268001
OLFML1	0.570005	0.0198094
EIF2S3	0.569802	0.00855574
NPM3	0.569482	0.0331724
RPL32	0.569337	0.00476002
MT-ND2	0.568951	0.0106803
C19orf57	0.568841	0.0305524
PIM3	0.568515	0.012821
RPL23	0.56833	0.0072574
SH3PXD2B	0.567943	0.0207642
SYTL3	0.567721	0.0245151
ECHDC3	0.56703	0.0111617
PET117	0.566411	0.044422
CERK	0.566166	0.00232693
RP11-832N8.1	0.565719	0.0248816
RFXANK	0.565651	0.045922
SLC5A6	0.565444	0.0199055
RPL29	0.565026	0.0447263
VGLL3	0.563168	0.0381866
SEMA3G	0.562401	0.0214875
TMEM176B	0.561852	0.049018
SLC10A3	0.561838	0.0036223
OPTN	0.561818	0.000666588
CDKN2C	0.56176	0.00608942
MT-CO2	0.5598	0.00688549
LGALS9	0.559416	0.0143704
FAXDC2	0.559155	0.00947751
GAS5	0.559006	0.0285054
SLC41A3	0.558798	0.0254906
DESI1	0.558713	0.000723021
CNN2	0.558399	0.0471767
OAF	0.558305	0.0221971
POLR1C	0.558228	0.00209085
ITGA6	0.557924	0.0314854
STAT5A	0.557021	0.0335718
DEK	0.556635	0.0188437
CCDC69	0.55653	0.0179858
INPP1	0.556026	0.0181182
MYOM1	0.555807	0.041082
NCL	0.555704	0.00842519
DTNB	0.555594	0.0153678
JUND	0.554913	0.0476878
C1orf162	0.55483	0.03854
ABT1	0.55472	0.00763468
CLEC2B	0.554326	0.0266482
RPL11	0.553908	0.0467965
AKIRIN2	0.553794	0.0415074
LTBP1	0.553164	0.0499639
TMEM42	0.552812	0.0214162
CRTAP	0.552691	0.00309178
NLRC5	0.55265	0.0200921
RIOK1	0.552232	0.00503953
PXDC1	0.551733	0.0406748
C17orf53	0.550581	0.0296131
COPS3	0.549911	0.00254436
NFKBIA	0.549626	0.00499312
ERAP2	0.549102	0.0445291
HMGB2	0.54898	0.00726607
NFIB	0.548516	0.00555743
CORO1A	0.548161	0.0444444
NAV2	0.547814	0.00497666
SVEP1	0.547746	0.034786
EIF3E	0.547437	0.0120888
C17orf89	0.546613	0.0194052
CYGB	0.546364	0.0441538
FMO2	0.545901	0.0304342
RPL14	0.545394	0.0321269
ADCK3	0.544616	0.0137508
AKAP1	0.543806	0.0224543
ETV5	0.542627	0.046453
METRNL	0.541925	0.0119525
GNE	0.54168	0.0482202
RNF122	0.54072	0.0176442
OSR2	0.540528	0.0232476
CD248	0.539966	0.0141257
GSN	0.539823	0.00178533
WASF1	0.53963	0.0149503
VASN	0.539163	0.0295895
MT-CO3	0.538985	0.0110089
CC2D2A	0.538567	0.00704193
DUSP7	0.537237	0.0284381
SRPR	0.537116	0.0267728
SAV1	0.536842	0.00348525
MFI2	0.536501	0.0306966
MDH2	0.536022	0.0149727
RAB6B	0.534647	0.042177
THRA	0.53316	0.00500146
GAB2	0.533111	0.0218923
MT-ND5	0.531905	0.0150102
XYLB	0.531667	0.0239438
BAZ1B	0.529808	0.0101149
GAL3ST4	0.529639	0.021038
AOAH	0.528035	0.0452664
VEGFB	0.525443	0.0206615
GPRC5B	0.52527	0.0271098
ID3	0.52508	0.0409711
RPL27A	0.524685	0.0242278
RPL36	0.524277	0.0293539
GZMH	0.524273	0.0471866
CPNE2	0.524137	0.0153318
FAHD2A	0.523256	0.0276428
ZBED3	0.52244	0.0077056
ZNF507	0.522179	0.0207914
PRKX	0.521857	0.0151784
DSE	0.521283	0.0178296
NACAD	0.521199	0.0281796
RBM14	0.521154	0.0215163
SPEN	0.519694	0.010675
P2RX7	0.518531	0.0201761
PTCH2	0.517817	0.0243925
SEC11C	0.517683	0.0422629
RP11-139H15.1	0.517275	0.0226305
ZBTB33	0.516748	0.0327974
SH2D3C	0.516248	0.0219232
INSR	0.51531	0.0019839
PROSC	0.514677	0.00457569
RPL22	0.514543	0.00628793
ZNF667	0.514484	0.0479373
PTK2B	0.514311	0.00593723
LAMB1	0.514003	0.0198462
TRMT112	0.512484	0.0312336
PHLPP1	0.512258	0.0177338
WDR77	0.512171	0.0384038
CEBPA-AS1	0.511564	0.0463392
NRDE2	0.511506	0.020439
ZCCHC24	0.511436	0.0361254
NYNRIN	0.509793	0.0173957
C1QA	0.509536	0.0360744
RP11-299J3.8	0.508827	0.0195338
SLC18B1	0.508549	0.0357984
PABPC1	0.506964	0.0293077
TMEM258	0.506896	0.00477311
ARF6	0.506777	0.0260309
DENND1C	0.506662	0.0364257
EMCN	0.505033	0.0298151
ITIH5	0.505004	0.02994
GPATCH11	0.501527	0.0445623
PAPD5	0.500743	0.045271
YY1AP1	0.500114	0.0280675
RARG	0.499554	0.0174849
NAP1L1	0.499404	0.00550759
SSBP2	0.498808	0.0141078
CFL2	0.497948	0.048397
COTL1	0.497034	0.0334223
RPS9	0.496011	0.0245166
WDR43	0.495477	0.00672302
PDGFC	0.494189	0.0454089
NDN	0.494077	0.0317422
GALT	0.494044	0.0161465
RHOJ	0.493919	0.0194332
PDCD7	0.493912	0.0266792
GIMAP1	0.493623	0.0448534
VPS51	0.49334	0.0181832
C1orf115	0.49326	0.0100933
NOB1	0.493028	0.00199673
COL15A1	0.492959	0.039531
SURF6	0.492802	0.0205798
BACH2	0.492476	0.040615
WBP2	0.492159	0.0287056
EXOSC7	0.491664	0.00521881
MRPL11	0.49084	0.0373505
MT-ND4	0.490598	0.00943342
TP53	0.490414	0.0422264
TIMP3	0.489727	0.00924007
EIF4B	0.489412	0.0166543
ADAM33	0.488874	0.0485422
MT-CO1	0.488424	0.0416956
RPL34	0.48746	0.0132125
SRF	0.486882	0.0263224
MYBBP1A	0.486365	0.0133239
GEMIN6	0.483955	0.0354294
ZNF462	0.483808	0.0169501
PPL	0.483057	0.0385033
FTSJ3	0.482997	0.0383018
C19orf43	0.482641	0.0468328
NXN	0.48186	0.0376477
TCP1	0.481588	0.0186027
LETMD1	0.480686	0.0175373
DAB2IP	0.480388	0.0195199
RPL35	0.477508	0.02147
UXT	0.477049	0.0157831
LMO4	0.475368	0.0235912
SH3PXD2A	0.474467	0.0187375
MSN	0.473722	0.017263
NLE1	0.472589	0.0166915
GDPD5	0.472587	0.0121013
TANK	0.472236	0.0260924
RPS23	0.472112	0.0111714
TBC1D2B	0.471846	0.0298751
HINT1	0.47156	0.00555646
BCL7A	0.470642	0.0243167
BMS1	0.469225	0.0316028
JOSD1	0.469132	0.0247978
MAP3K13	0.46877	0.0343725
USE1	0.468433	0.0478047
FAM58A	0.467417	0.024383
PRDX6	0.466735	0.0124497
LMCD1	0.466054	0.0126828
EXOSC2	0.465757	0.0152943
TSR3	0.465514	0.0436175
ENTPD6	0.464424	0.0436305
HNMT	0.464309	0.0258921
TMEM185B	0.464168	0.0284566
BEST1	0.463968	0.0175288
PRPF4	0.462	0.0224441
ROBO3	0.461603	0.0487592
CTD-2540B15.9	0.461426	0.0451164
C5orf56	0.459349	0.0381264
FUS	0.459248	0.0250908
ARID5B	0.458556	0.0130859
MCAM	0.458138	0.0373417
TYK2	0.457807	0.0253635
QSOX2	0.457395	0.0206115
FXN	0.457281	0.0106808
KCTD5	0.457207	0.0204676
ZNRF3	0.457158	0.0267387
WDR91	0.455294	0.0387337
SUMO2	0.455249	0.030295
ROBO4	0.454915	0.0302735
ZNF575	0.453998	0.0275278
IL16	0.453522	0.0256004
SH3KBP1	0.452982	0.0271282
MT-ND3	0.452867	0.014464
KANK2	0.451798	0.0211404
ZFAS1	0.451242	0.0136798
COX15	0.451146	0.0156675
ZNF438	0.45036	0.024505
PRDM11	0.449774	0.0279816
SHMT1	0.449719	0.00346588
SFT2D2	0.449531	0.021774
FARSB	0.449239	0.00613242
GYPC	0.449193	0.0191725
ITM2C	0.447452	0.0496785
ALKBH5	0.446911	0.0393032
ZNF394	0.445856	0.0360641
ESAM	0.443715	0.0379017
YBX3	0.443566	0.0229445
UBAP1	0.44354	0.0172993
DDB2	0.441843	0.042208
HECTD3	0.440852	0.0179655
GPR56	0.439233	0.0082481
EHD1	0.439225	0.0244836
MRPS9	0.439126	0.00887818
TPT1	0.438088	0.00491489
TMEM18	0.437596	0.0120242
RPS12	0.437503	0.0214352
CRTC3	0.436541	0.0142272
KIAA1147	0.436169	0.0474563
TMA16	0.435358	0.0246704
NMT2	0.435115	0.0342487
UROD	0.434746	0.0281751
DAPK2	0.433895	0.0168942
UBIAD1	0.433409	0.035888
EFNB1	0.432863	0.0426339
NCK1	0.431879	0.0411694
TNRC6B	0.431413	0.0262263
PRCC	0.431251	0.0369905
EEF1D	0.430638	0.0320418
CDC42EP2	0.430285	0.00721698
CCDC120	0.429779	0.0256228
EBPL	0.429099	0.0338725
SRGAP2	0.428073	0.0347088
NOP2	0.427941	0.0330752
RECK	0.427788	0.0299547
GNG7	0.427443	0.0177647
TAF7	0.426639	0.0287532
ERG	0.425345	0.0391709
EIF3L	0.424751	0.00841025
ARID4A	0.424659	0.0401511
CTD-2369P2.2	0.424578	0.00344639
BST1	0.424474	0.0372274
VAT1	0.42433	0.0338076
UPF2	0.423538	0.0217271
GBGT1	0.423498	0.0442981
SCNM1	0.422825	0.0113744
METAP1D	0.422511	0.0315335
GTPBP4	0.421919	0.0381646
PYGB	0.421729	0.0267327
SLCO3A1	0.419965	0.0190499
NDNL2	0.419797	0.0313342
STK40	0.419659	0.0100576
RPL36AL	0.418693	0.0327964
FAM219B	0.417678	0.0284243
ZMYND15	0.414816	0.0198295
EIF2D	0.414534	0.0478937
KARS	0.413998	0.0361967
VTI1B	0.413245	0.0371885
ALS2CL	0.412774	0.0212132
HNRNPL	0.412057	0.0323779
ACCS	0.411828	0.0475893
RP5-1085F17.3	0.4099	0.0262938
FKBP9	0.409686	0.0428717
RNPS1	0.409548	0.0252218
BIN1	0.40871	0.0496329
RALBP1	0.407946	0.0357367
DYM	0.407341	0.0201285
SNRPC	0.404046	0.0250044
YIPF5	0.402438	0.0211257
AGFG2	0.401774	0.0121968
ADAT2	0.4017	0.0273796
BCCIP	0.401255	0.0441119
MID1IP1	0.401017	0.044235
SIK2	0.400416	0.00931165
CS	0.400334	0.0207996
MED12	0.399916	0.0247437
ZNF33B	0.399678	0.0490986
KLF13	0.399393	0.0381144
GCN1L1	0.397549	0.0243452
ATXN7	0.396538	0.0442072
RANBP1	0.395487	0.0167423
NELFE	0.393442	0.045842
IPO5	0.392743	0.00875252
CLCN6	0.392289	0.0443254
ZNF830	0.390894	0.0380219
STAT3	0.390639	0.0334469
AAR2	0.390445	0.0447309
MRTO4	0.389842	0.0477744
SKAP2	0.388967	0.0246879
LARP1	0.388812	0.00509045
MICALL1	0.388233	0.0361391
CUL1	0.388121	0.0283193
LYRM7	0.386423	0.0438789
THAP11	0.38623	0.0484732
SF3A1	0.385984	0.0156018
HIBADH	0.385626	0.0265852
NOTCH1	0.38558	0.0261753
IRF2BP2	0.384607	0.015597
CDYL	0.384106	0.034857
ERCC5	0.383643	0.0247775
MAP4K4	0.383228	0.0441818
TAB1	0.382649	0.0159562
EIF1	0.38262	0.0295773
USP53	0.382404	0.0402744
RIN3	0.380672	0.0374493
LITAF	0.380317	0.0148119
NIP7	0.380216	0.0177288
DCP1A	0.37907	0.00633277
MRPL21	0.377861	0.0325951
ADSL	0.377195	0.0383881
HCG11	0.376286	0.0460699
IRS2	0.374766	0.0471076
TPP1	0.374043	0.0205163
ACVRL1	0.373576	0.0307792
GLG1	0.373498	0.0428699
C19orf12	0.37281	0.0314461
KCTD10	0.371338	0.0361105
SNUPN	0.370819	0.0417444
SF3B2	0.37066	0.0466192
C10orf54	0.369662	0.0434106
PDHA1	0.368069	0.0213856
DUSP22	0.367365	0.0275175
FAM43A	0.367331	0.041139
DDX24	0.366977	0.0402077
NIPAL3	0.366516	0.018542
POLR1D	0.362893	0.0181804
ZNF263	0.36287	0.0112568
NDUFA1	0.361957	0.0229795
ZCCHC11	0.358882	0.0486395
PPM1G	0.357262	0.0420141
USB1	0.357104	0.0443577
PCBP2	0.35489	0.045051
SSBP3	0.353016	0.022839
MLH3	0.35257	0.0297039
TRAF3IP2	0.351342	0.0401017
TMEM109	0.349173	0.0346184
PAGR1	0.348099	0.0344068
NUB1	0.346266	0.0154383
ADD1	0.345171	0.00885817
EIF2S2	0.344144	0.0344549
NFYC	0.343615	0.00847198
OXA1L	0.343446	0.0196669
MPZL1	0.342618	0.0193465
EPB41L1	0.338244	0.0146443
CREG1	0.333309	0.0405276
METAP2	0.332869	0.0491958
CHRAC1	0.331444	0.0478581
ZNF740	0.329985	0.0393573
SERBP1	0.328864	0.0156183
SUFU	0.327505	0.0342884
RBM3	0.326073	0.0362952
MIEF1	0.325958	0.0212281
ARPC1A	0.324428	0.0486914
U2AF1	0.323471	0.0183657
TOR3A	0.321994	0.0385003
AHDC1	0.321837	0.0439731
E2F4	0.318095	0.0258781
PSMF1	0.318093	0.0379914
MAU2	0.3177	0.0191434
SRSF4	0.317499	0.0383053
CFDP1	0.311219	0.030935
RBM48	0.309121	0.0382788
PITHD1	0.308681	0.0274955
ZC3H8	0.306769	0.0343425
ZBTB4	0.306331	0.0460408
CSDE1	0.304836	0.0346207
DHRS1	0.30319	0.0450221
PSMD7	0.303173	0.046707
PCDH12	0.303107	0.0390985
PSMA7	0.298441	0.0362388
EIF4EBP2	0.291812	0.0497053
RRAGC	0.287558	0.0146278
SAP18	0.28241	0.0343275
MAPK14	0.280432	0.047971
MAX	0.275886	0.0171685
SURF4	0.27051	0.0463778
GATAD2A	0.267727	0.0282562
RBM15B	0.239466	0.0456801
RQCD1	0.234462	0.0452782

## Sheet: STAR_DESeq2_up_Normal_vs_DCIS
Gene ID	log2FC (NvD)	p-value
SOX8	3.27489	1.06572e-12
NDRG2	2.17331	2.12467e-11
RGMA	2.68844	5.80723e-11
KIT	2.82174	9.1837e-11
CACNA1G	2.69261	2.70866e-10
ALX4	2.76421	2.90486e-10
SOX10	3.56938	4.37608e-10
RSPO1	3.87615	5.66647e-10
C2orf82	3.77905	6.64731e-10
SRPX	2.68046	8.54704e-10
CCL28	3.05664	1.49764e-09
RP11-161M6.2	2.37522	4.9054e-09
ADCYAP1R1	2.74663	4.94945e-09
RP11-292F22.7	4.86762	4.94945e-09
AC016995.3	4.75561	6.07884e-09
TRIM2	1.91986	8.19475e-09
GPC3	2.33498	1.08863e-08
FAM13A	1.92638	1.40064e-08
ETV3L	4.58998	1.5027e-08
PIGR	4.3152	1.57584e-08
CENPV	2.31584	1.59916e-08
RHOJ	1.88379	2.66073e-08
CX3CL1	2.35635	2.82431e-08
TTYH1	3.33106	3.20127e-08
RASGEF1C	3.67298	3.46457e-08
CRYAB	2.22478	3.47788e-08
CAPN6	3.17423	7.69297e-08
KRT15	3.80374	7.82137e-08
LAMC3	2.22001	9.48846e-08
APBA1	1.94891	1.1295e-07
CYP11A1	2.29202	1.14069e-07
SLC13A2	3.23055	1.99169e-07
RP11-211G23.2	4.0282	2.14994e-07
RP11-154D6.1	2.90989	2.32348e-07
CASC8	5.14704	2.36021e-07
FAM20A	2.14172	3.05633e-07
FBLN5	1.38999	3.05633e-07
IRX1	2.65492	3.08458e-07
KCNH3	2.29653	3.08458e-07
OLFML2A	1.78357	3.08458e-07
SFRP1	2.60667	3.15098e-07
ADAMTS5	2.00204	3.20203e-07
CCDC8	1.80494	3.94955e-07
DENND2A	1.67951	4.13038e-07
GABRP	2.93934	4.44649e-07
CNN1	2.17149	5.40455e-07
OSR1	2.02308	5.40455e-07
LEPREL1	1.52808	6.2499e-07
WDR86	1.89466	6.25253e-07
CD300LG	2.24517	6.37667e-07
RP11-93B14.5	4.77004	7.49157e-07
DLK2	2.8254	8.64785e-07
EXTL1	2.48648	8.72726e-07
C10orf90	5.29549	9.56125e-07
TCF7L1	1.60414	9.56125e-07
COL23A1	1.91638	1.10735e-06
EEPD1	1.67998	1.12579e-06
NEURL3	3.01351	1.17219e-06
PRDM8	2.02726	1.50159e-06
MFI2	1.90169	1.51063e-06
RECK	1.54303	1.88874e-06
IGF2-AS	2.51149	1.98523e-06
ROPN1B	4.91602	2.37049e-06
S100B	2.12491	2.59359e-06
PDE9A	2.02738	2.70935e-06
PNMAL2	1.42631	2.70935e-06
ECEL1	3.60568	3.05762e-06
MAML2	1.80129	3.61324e-06
LINC00640	3.09933	4.05022e-06
KLF5	2.12659	4.07868e-06
YPEL4	1.66667	4.33454e-06
FMO1	2.11112	4.35484e-06
BTNL9	1.61508	4.65399e-06
GAS7	1.41434	4.65399e-06
FZD7	1.66477	4.75156e-06
TMEM132C	2.32326	4.75156e-06
DLK1	4.22391	4.8642e-06
HAPLN3	2.11541	4.95386e-06
NRG2	2.20299	5.13302e-06
OXTR	2.42732	5.74528e-06
RASL10A	2.53873	5.76862e-06
ROPN1	5.30409	5.88388e-06
WNT6	2.0465	6.69894e-06
FIGF	3.01164	7.42629e-06
PKP1	2.54249	7.54471e-06
FREM1	2.76827	7.86843e-06
ALPL	1.97149	8.90188e-06
CORO2B	1.98025	9.62716e-06
RP11-332H18.4	1.33237	9.62716e-06
TPT1-AS1	1.29315	9.62716e-06
PTPRH	2.22131	9.65997e-06
SPRY2	1.72416	1.04632e-05
CAPN11	2.05534	1.06896e-05
MAF	1.29945	1.17251e-05
EDNRB	2.14751	1.19098e-05
PCDH18	1.94869	1.4259e-05
TESC	1.93699	1.48094e-05
HIC1	1.65704	1.53679e-05
ABCA10	2.03478	1.6248e-05
KIF26A	1.37305	1.74888e-05
FAM150B	3.9811	1.77444e-05
AC097724.3	2.92764	1.81907e-05
LY6D	3.10589	1.81907e-05
NOB1	1.12462	1.81907e-05
IL1RL2	2.01849	1.89555e-05
TWIST2	2.65178	1.89555e-05
CHRDL1	2.07329	2.18536e-05
SEMA5A	1.5769	2.21807e-05
ANGPTL4	1.77828	2.29625e-05
PDGFA	1.47392	2.4221e-05
PRSS50	1.90096	2.48321e-05
RP11-189B4.6	4.43812	2.48321e-05
PPAPDC3	1.58098	2.9067e-05
NES	1.15996	2.95148e-05
PTH1R	1.52939	3.31826e-05
GALNT16	1.73626	3.58354e-05
SLC34A2	2.48692	3.58354e-05
ADAM33	1.62627	3.6128e-05
COLCA1	2.09732	3.66528e-05
CD164L2	1.93751	3.76999e-05
MYEOV	3.26217	3.7714e-05
ANO1	1.29211	4.13916e-05
ROBO3	1.54277	4.35016e-05
LHFPL2	1.69064	4.46767e-05
KLK1	2.27174	4.55086e-05
PDGFRA	1.56087	4.58188e-05
APCDD1L	2.75204	4.83248e-05
RP11-470P21.2	4.37681	4.8862e-05
EMILIN2	1.63917	5.39442e-05
BMP7	1.82096	5.56381e-05
KANK4	2.07983	5.70184e-05
GFAP	3.57306	6.04565e-05
APLN	2.35463	6.19096e-05
CDKN1C	1.58041	6.19096e-05
PTPRG	1.28193	6.19096e-05
C17orf51	1.46592	6.33428e-05
FAM189A2	1.71588	6.51106e-05
MME	1.55298	6.51106e-05
FXYD6	1.5803	6.82047e-05
C1orf61	3.7376	6.89758e-05
TMEM213	3.43572	7.29503e-05
EFNB1	1.42034	7.45238e-05
ALDH7A1	1.19474	7.50277e-05
FGF1	1.87626	7.50277e-05
CTD-2587H19.2	4.08483	7.66472e-05
MT1M	2.38491	7.78002e-05
KCNIP2	2.35009	8.09725e-05
TRNP1	2.08991	8.3604e-05
NFIB	1.25334	8.45835e-05
LRRN4CL	1.58528	8.895e-05
CDH4	2.14148	8.95141e-05
KCNIP3	1.23904	9.00083e-05
PENK	4.43689	9.17981e-05
ELF5	2.4084	9.28442e-05
ITIH5	1.45835	9.31471e-05
MYRF	1.73154	9.52957e-05
PLK5	2.47878	9.68442e-05
KCNIP1	2.35592	0.000108025
NRXN2	1.33433	0.000108025
SOBP	1.50735	0.000108025
PHLDA1	1.50696	0.000108243
PLAGL1	1.62245	0.000108585
PRIMA1	2.47394	0.000108585
RASL12	1.59538	0.000108585
IL11RA	1.35831	0.000109933
SAV1	1.16263	0.000109933
PRR4	1.68845	0.000111058
TMEM130	1.90765	0.000111194
OLFML3	1.46755	0.000113264
PPP1R14A	1.42783	0.000113415
EGR1	2.16994	0.000113924
NDN	1.42998	0.000119591
TMEM158	1.89881	0.000119591
FAXDC2	1.32659	0.000124402
ANKRD35	1.48927	0.000124488
TNNI2	1.64373	0.000125561
STAT5A	1.62771	0.000140996
ETV6	1.02191	0.000141622
INSRR	1.92242	0.000144335
KCNN4	1.83618	0.000144335
GSN	1.00492	0.000145334
SOSTDC1	3.04759	0.000145334
GPRC5B	1.51189	0.000150772
CD248	1.34811	0.000153478
MUC4	2.86648	0.000153685
RAB3IL1	1.25151	0.000153685
TPTEP1	1.68757	0.000153685
EPHA2	1.42412	0.000154297
IL15RA	1.63479	0.000154297
KCNMB1	1.65258	0.000154297
CNTN1	1.87	0.000171531
NAALADL1	1.5383	0.000179465
DCX	2.90345	0.000180346
ETV5	1.69059	0.000180346
NID1	1.59914	0.000180346
CXCL12	1.51432	0.000181018
SLC22A3	2.65061	0.000187946
RP11-469H8.6	3.45405	0.000188113
AMN	2.39953	0.000193677
HRCT1	1.91532	0.000205431
ADAMTS12	1.47413	0.000205512
RP11-566J3.4	4.72536	0.000216803
RP11-817J15.2	3.38044	0.000218706
TSHZ2	1.44993	0.000219241
ASTN1	2.40426	0.000222827
IGF1	1.97563	0.000229632
CHRM1	2.50675	0.000231094
TNN	1.78629	0.000234441
FOLR1	2.90065	0.00023515
COL15A1	1.42522	0.000255183
USP2	1.51445	0.000255183
LINC00842	2.97279	0.000256797
MIR143HG	1.61142	0.000257838
HAND2-AS1	1.84593	0.000261123
SOX15	1.66424	0.000261123
SAA4	2.94245	0.000261816
PAMR1	1.4818	0.00026282
CMTM5	2.42926	0.000270613
DAPK2	1.10685	0.000274338
BDKRB2	1.55519	0.000287049
ASIC1	1.58748	0.000295891
NTRK1	1.6804	0.000296436
RELN	2.49442	0.000296436
PADI2	1.93309	0.000296513
TRIM29	1.55407	0.000305721
LRRC38	3.93811	0.000306273
CMTM7	1.26859	0.000307413
NLGN2	1.02986	0.000311828
TPM2	1.01727	0.000311828
SCARA5	1.99536	0.000318412
TNFRSF21	1.49934	0.000318872
SLC17A7	2.43281	0.000341689
KCNQ4	1.90199	0.000343977
S100A1	2.07461	0.000351968
FMO2	1.43083	0.000355641
CDKN2C	1.17435	0.000364223
GGTA1P	1.45307	0.000373483
PIK3R1	1.01019	0.000386996
MYC	1.46151	0.000395998
MYL3	2.34222	0.000395998
CCNB1IP1	1.52073	0.000398575
DUSP9	2.98204	0.000398575
EYA2	1.6932	0.000398575
ITPRIPL1	2.96174	0.000399056
EGFR	1.54532	0.000400633
F10	1.49556	0.000401969
RYR1	1.42658	0.000401969
NSG1	1.76018	0.000416673
NYNRIN	1.25954	0.000428094
RCAN1	1.40155	0.000428094
PRRX2	1.28708	0.000428371
FAT2	1.90394	0.000429589
PTPRN	3.54199	0.000437099
CCL21	2.03215	0.000437121
CA4	2.19835	0.000440928
RP11-180I4.2	3.42533	0.000441166
IGHA2	2.06907	0.000444042
TCEAL7	1.88729	0.000444042
GLTSCR2	1.14511	0.000449269
AL035610.1	2.46217	0.000453652
PTPRZ1	2.253	0.000454102
LOXL4	1.94396	0.000471754
CLIP3	1.1135	0.000478609
SLCO1A2	4.60494	0.000485421
INPP1	1.33168	0.000488711
ZNF462	1.1629	0.000495862
G0S2	2.50348	0.000499149
DZIP1	1.53511	0.000517128
EPB41L4A-AS1	1.15128	0.000518947
SIRPA	1.3147	0.000520863
CDX1	2.54188	0.000525745
KLK2	4.41379	0.000525745
TMEM59L	1.84263	0.000528676
ARRDC3	1.85857	0.000537815
GPR97	2.20268	0.000544905
CDC20P1	2.38804	0.000562452
FGF2	1.72227	0.000566698
SLC25A27	1.98746	0.000571199
COLGALT2	1.74293	0.000572305
ALS2CL	1.03839	0.000574027
NPM2	1.7215	0.000587119
LZTS3	1.53605	0.000591324
AQP7	2.17883	0.000602347
BARX1	1.866	0.000607282
FBXO17	1.20776	0.000608161
ZMYND15	1.02673	0.000615302
DMD	1.38223	0.000619357
WIF1	3.12798	0.00063645
TCEAL5	2.83158	0.000649368
TCF7L2	1.18149	0.000649368
PPP1R1A	1.98342	0.000659342
SLC2A4	2.03754	0.000680051
LMOD1	1.42039	0.000681657
CD36	1.80936	0.000682101
SORBS1	1.4909	0.000683142
ARHGAP26	1.36681	0.000694499
PLEKHG4	1.24273	0.000698563
RP1-193H18.2	1.80723	0.000703938
RGAG4	0.953893	0.000730818
PAK3	1.67557	0.000760842
NRG1	2.18068	0.000781786
CHGA	3.39823	0.000785257
KLK10	2.00235	0.000789951
PHLPP1	1.24037	0.000789951
LAMB3	1.59985	0.000791486
HSPB2	1.53523	0.000793243
PIK3C2G	2.4802	0.000801018
LINC00086	1.75722	0.000801042
STAT5B	0.696459	0.000818518
RNF186	5.92483	0.000839122
RNU1-88P	3.81754	0.000842809
MIR145	1.50785	0.000849783
KCNMB4	1.4953	0.000858067
XPNPEP2	2.05338	0.000871071
PELI2	1.29716	0.000873069
KLHL29	1.37418	0.000885528
ATL2	0.961615	0.000920363
PDE1C	1.97238	0.000921307
SLIT3	1.1431	0.000921307
SNX32	1.60697	0.000925167
DPP6	1.31918	0.000938249
PDZD4	1.12254	0.000943332
SH3PXD2B	1.34411	0.000943332
PSD2	2.39647	0.000950358
RPS20	0.912999	0.000964442
C1RL	0.867156	0.000977325
SAA2	2.13454	0.00099477
CCDC102A	1.00903	0.0010081
C17orf49	1.24859	0.00108806
KLHL13	2.1858	0.00109036
FZD10-AS1	1.33591	0.00109227
TGFBR3	1.35757	0.00110111
AC027612.6	1.49104	0.00112021
TMPRSS2	1.70867	0.00113918
PLA2R1	1.21376	0.00117765
FZD1	0.921115	0.00119249
AASS	2.04967	0.0012123
BCL11A	1.66439	0.00121657
TF	2.35176	0.00124521
TNFSF11	4.34313	0.001259
TMEM178A	1.52694	0.00126024
PDLIM4	1.13781	0.00127689
HS3ST4	3.12407	0.00128408
IGLL5	2.11342	0.00128408
AP001816.1	1.22654	0.0013156
PLSCR4	1.15857	0.00131878
WASF1	1.23698	0.00132345
FLNC	1.51531	0.0013422
PLTP	1.60707	0.0013422
APCDD1	1.38615	0.00135797
ARHGEF40	1.11783	0.00136065
STAC2	2.36609	0.00136065
GPR144	3.27798	0.00136517
MT1A	2.39066	0.00138621
PLXNA4	1.50181	0.00149223
EDA	1.54536	0.00153296
NEURL2	1.14311	0.00154482
C2orf40	1.89559	0.001567
FGFR1	1.00554	0.001567
AF131215.9	1.23223	0.00158329
EFNB3	2.05532	0.0016521
FOSL1	1.96852	0.00166946
MMP19	1.57784	0.00166946
HOXA-AS2	1.24301	0.00167126
IRS2	0.96894	0.00167314
ENPP6	2.24591	0.00170263
LAMB1	1.12852	0.00171521
PLCL2	1.37256	0.0017367
SLC6A14	2.52751	0.00174019
CSF1	0.857732	0.00175339
CPED1	1.31602	0.00177037
MFAP4	1.43346	0.00177583
PRCD	1.14859	0.00177583
C2orf88	1.72368	0.00180008
IGJ	2.06229	0.0018035
CPAMD8	1.61674	0.00183094
CTD-2369P2.2	0.749087	0.0018607
ARAP3	0.810389	0.0018697
MT1L	1.44476	0.00189154
PDGFD	1.34481	0.00189686
GRAMD3	1.13594	0.00193228
NTRK3	1.53344	0.00195461
KRT5	1.83874	0.0019814
AC124789.1	1.4894	0.00199525
BOC	1.40183	0.00199525
GSTM2	1.53839	0.00199525
ITM2A	1.65549	0.0020356
TEPP	1.69147	0.00205626
AC006116.20	1.81694	0.00206387
RARRES2	1.16103	0.00208166
ANKRD53	1.21486	0.00208442
GALT	1.0836	0.00208684
GAL3ST1	2.50708	0.00209027
DPYD	1.11823	0.00210205
PRX	0.818505	0.00212504
RASL10B	1.80843	0.00212628
JUN	1.27525	0.00214373
LAMA2	1.05969	0.00216996
SLC7A3	2.22283	0.00221352
CLDN8	1.88801	0.00221989
ATOH8	1.54324	0.00222545
ARID5B	0.924156	0.00227526
MAFF	1.32975	0.00227526
TNNC2	1.03005	0.00227526
SSBP2	1.06298	0.00228885
LRFN5	2.22006	0.00230264
LIF	1.89634	0.00234311
LIMS2	0.957621	0.00235221
CSN3	7.76056	0.00238019
SMARCD3	0.912063	0.00239188
EPHB3	1.42421	0.0023971
TPPP2	2.90156	0.0023996
CRMP1	1.47623	0.00246811
MAB21L1	1.67174	0.00246811
RNF150	1.0681	0.00246811
GPR124	1.72581	0.00248158
RP4-665J23.1	1.38198	0.00248859
CFD	1.52712	0.00249356
CSRP1	1.07095	0.00250533
ADH1B	2.05928	0.00253084
MIR4454	2.90922	0.00253084
FOXO1	1.0788	0.00255329
CECR7	1.73812	0.00258996
CNTFR	1.63189	0.00260723
FGF17	1.47821	0.00260825
GNG7	0.949739	0.00263566
ICAM5	1.6025	0.00264419
MMP16	1.679	0.00266114
PER1	1.69226	0.00271139
C1R	1.09555	0.00273921
PLEKHH2	1.32507	0.00277175
TNS4	1.3885	0.00277912
ALDOC	2.43501	0.00280501
EVC2	1.28071	0.00280784
SEMA6D	1.73209	0.00280789
ACTR3B	1.42391	0.00283397
MEST	1.40435	0.00289688
CXCL6	2.61373	0.0029247
IQSEC3	1.18906	0.0029247
LHFP	0.286543	0.0029247
RP11-217B1.2	1.983	0.0029247
TNNI1	2.70151	0.0029247
FBL	1.26306	0.00293439
HAP1	1.74982	0.00293439
KIAA1549L	2.46934	0.00299022
C11orf16	3.41755	0.00308963
ADAMTS1	1.39373	0.00310686
TUSC5	2.37076	0.00311219
ALB	3.51772	0.00313169
TSSC2	1.70201	0.00315929
MMP7	1.75595	0.00316721
NKPD1	1.54714	0.00316721
SCGB3A1	2.01185	0.00316721
LA16c-366D3.1	1.72	0.00320114
KLK13	3.04245	0.00321816
PLIN1	2.27971	0.00321878
NLE1	1.00991	0.00325027
KANK2	0.952234	0.00330134
NTF4	1.77972	0.00330957
Z83851.1	1.63439	0.00334948
AHDC1	0.816158	0.00335633
SERPING1	1.31834	0.00335633
PTRF	0.904073	0.00338091
FABP4	2.1454	0.00341542
MYH11	1.58641	0.00341542
GPM6B	1.43404	0.00343564
CDH23	1.07478	0.00344387
EFCAB1	2.12844	0.00344992
FAM184A	2.06144	0.00346541
MAMDC2	1.4784	0.00346541
POLR1E	1.20226	0.00346991
FAM43A	0.918951	0.00351959
HOXA4	2.42351	0.00351959
TCEAL2	2.70925	0.00351959
GAS1	1.20834	0.00352418
AKAP12	1.39958	0.00356637
CDC42EP5	1.12966	0.00361343
LRP1	1.1602	0.00361343
RP11-61A14.1	5.45407	0.0036476
RPL13	1.42811	0.00364988
BBOX1	2.15039	0.00366038
CLDND2	1.24095	0.00370215
EGR2	1.91566	0.00374238
LGR6	1.50619	0.00374904
TNFRSF8	1.41424	0.00375234
WDR27	0.847458	0.00380131
RPS4XP1	1.84997	0.003931
CHST2	1.21056	0.00396903
PTCHD1	2.04764	0.00400767
HSPB6	1.86224	0.00401901
AMIGO2	1.26144	0.00406958
ABCA9	1.36008	0.0040732
RP11-1002K11.1	2.03598	0.00408767
GLIPR2	1.014	0.00415909
SHMT1	0.704231	0.00416869
IGF2	1.54626	0.00417963
FBXO2	1.53068	0.00418222
MIR497HG	1.62596	0.00420461
PDPN	1.05768	0.00420948
CLMP	1.1199	0.00423637
TSHZ3	1.18083	0.00426464
DAB2IP	1.01093	0.00433484
RP11-923I11.7	1.67342	0.00436651
MEG3	1.43652	0.00436943
ABCA8	1.2742	0.004453
PNRC1	1.0102	0.0044563
RPL32	0.971312	0.00449658
MRAS	1.00818	0.00466216
PIANP	2.08632	0.00466216
RP11-834C11.7	2.95775	0.00466216
SERPINB5	1.54051	0.00466216
ACTG2	1.55166	0.00487618
NRTN	1.32482	0.00492846
SLC26A5	1.72541	0.00495244
IGLC3	1.96604	0.00496301
DCHS1	0.899419	0.0049988
TMIE	1.94879	0.00502772
BEGAIN	1.16618	0.00507365
PI3	2.20176	0.00507365
CRABP1	2.21677	0.00507761
SCN3B	1.64407	0.00511182
ST8SIA2	2.39063	0.00511182
FAM211A-AS1	1.10322	0.00511505
WNT2	2.48558	0.00513073
CYP24A1	3.6747	0.00515405
SPTBN1	0.855309	0.00516546
C10orf54	0.889709	0.00516594
ERCC5	0.851694	0.00517623
SYDE1	0.921207	0.0052271
HAND2	1.59522	0.00524345
PTPN14	0.879075	0.00525423
ARC	1.81624	0.0053126
GNB5	0.921564	0.0053126
MYLK	1.13636	0.0053126
RASD1	1.48909	0.0053126
OGFRL1	1.0213	0.00531317
ASPG	2.00458	0.00535141
KRT14	1.90006	0.00536636
FXYD1	1.64245	0.00538025
RP11-130L8.2	1.15148	0.00538025
IL17RD	1.38593	0.00545903
HGF	1.55129	0.00546632
TMEM200C	1.67606	0.00546632
NGFR	1.24838	0.00547622
ST8SIA1	1.19693	0.00547622
RP11-398K22.12	1.40603	0.00553425
SDC3	1.0929	0.00553425
HBG2	8.00754	0.0055916
PRSS45	1.44183	0.0055916
HPS5	0.945384	0.00559181
MYOM1	1.27269	0.00564807
RP11-817J15.3	5.36994	0.00564807
SIK2	0.695461	0.00566071
RBMS3	1.01123	0.00566526
RILPL2	1.02753	0.00573683
ARHGAP28	1.95182	0.00576513
RP11-92C4.6	1.32704	0.00581889
LYVE1	1.6159	0.0058766
EEF1B2	0.891261	0.00601773
RPS6	0.929131	0.00610656
TMEM176B	1.32336	0.00610656
ZNF667	1.27604	0.00610781
NPR1	1.10717	0.00616949
RP11-489E7.4	1.36371	0.00618621
DZIP1L	0.994302	0.00619657
SOX9-AS1	1.97357	0.00619657
TP63	1.32222	0.00619657
HSD17B2	2.42587	0.00619917
RP11-166D19.1	1.29702	0.00623367
XPC	0.733197	0.00625784
NT5C3B	0.920098	0.00626427
C1QTNF4	1.10327	0.00628137
RNF212	1.43167	0.00632108
PHOSPHO1	2.14523	0.00637539
C3orf17	0.956643	0.00638616
MYO1H	1.63809	0.00644264
MT1X	2.02597	0.00648439
CHST3	1.09202	0.00648995
NACAD	1.05857	0.0065174
RP11-981G7.2	2.90867	0.0065174
VSTM5	2.85483	0.00652264
GAREML	1.18497	0.0065608
KLK11	2.85928	0.00661272
PTCH2	1.06863	0.00661272
GPIHBP1	1.26559	0.00661899
AVPR2	1.11737	0.00674931
CYP4F29P	1.91878	0.006828
ITM2C	1.04348	0.00684183
IGLV6-57	2.17214	0.00685935
RPS19	1.12991	0.00687058
FANCE	0.881403	0.00694475
CYP1B1-AS1	1.63625	0.00698024
PTPRVP	1.31986	0.00698589
EDN3	1.7981	0.00701291
ADAM12	1.648	0.00704084
FAM181B	1.89388	0.00707758
CAPN5	0.886738	0.00711578
ANO1-AS2	2.62688	0.00724753
PPAP2B	1.1059	0.00731981
MPZ	1.11647	0.00741326
HS3ST6	1.99218	0.00741614
AC004562.1	2.99148	0.00743029
ARL4C	0.866228	0.0075652
HCG11	0.857851	0.0075652
OAF	1.09655	0.00757273
RP11-467I17.1	1.62508	0.00757843
PDE4B	1.4084	0.00758469
C5orf27	2.53344	0.00758642
CHD9	0.749601	0.00765372
LAMC1	0.895692	0.00768059
MMRN1	1.62082	0.00777531
TXNIP	1.06881	0.00778955
XDH	1.77064	0.00778955
CMA1	1.74813	0.0077906
DCN	1.1993	0.00783379
SCN2A	2.3125	0.00784394
LY75	1.37417	0.007867
LALBA	7.96114	0.00790651
TSPYL2	0.994355	0.00791055
PYGB	0.887158	0.00791934
DES	2.05702	0.00812138
NRIP2	1.28332	0.00812678
DAAM2	1.31627	0.00823843
SH3BGR	1.37431	0.00826014
RP11-7I15.4	2.26906	0.0082734
HIF3A	1.14735	0.00828166
ITSN1	0.844625	0.00830519
FRZB	1.18717	0.00838156
RP11-252A24.7	1.05786	0.00847695
EGF	2.07435	0.00849786
FNDC4	1.05566	0.00851289
PRSS12	1.63595	0.00851289
CYR61	1.21741	0.00856625
HOXC-AS1	1.52281	0.00858868
MIA	2.20742	0.00860012
GEMIN4	1.0205	0.00869392
HLF	1.21714	0.00869392
CLEC3B	1.93016	0.00879743
SEMA6A	0.940013	0.0088407
SDPR	1.42388	0.00884199
RP4-575N6.2	2.3445	0.00884565
TNNT2	1.76664	0.00886587
RPL13P2	1.3294	0.00893548
NFYC	0.574324	0.0090243
PROS1	1.22703	0.009215
PPP1R15A	1.1629	0.00922301
RP3-473L9.4	1.54804	0.00927656
YBX3	0.870278	0.00933534
LTF	1.71413	0.00936751
LCA5	1.5578	0.0094289
CDC42EP2	0.704444	0.00943331
FAM101A	1.63293	0.00944706
RNF128	1.63988	0.00947944
PTPRS	0.929146	0.00950536
TMEM176A	1.28548	0.00953112
VSTM4	0.825917	0.00953745
FAHD2A	1.0929	0.00955676
CD14	1.19844	0.00957084
WLS	0.972016	0.00986399
CIDEC	2.31132	0.00996303
B3GALT5	1.4922	0.00997043
CSN1S1	6.32291	0.00997043
RSL1D1	1.03954	0.0100282
RP11-1008C21.2	1.81492	0.0100684
FBXW7	0.749709	0.0101004
PDE2A	1.14932	0.0101722
MFAP3L	1.28471	0.0101937
ART5	1.49517	0.0103213
MYOM2	1.47402	0.0103829
ALDH3A1	1.40188	0.0104156
FGF14-AS2	1.38277	0.0104164
SMYD1	1.79275	0.0104342
UACA	1.05918	0.0106126
LRRC4B	1.27997	0.010679
CXCL2	2.19528	0.0107475
CELF5	1.51513	0.0108101
CSF3	3.30889	0.0108385
RPLP0	0.899625	0.010841
SAMD5	1.53647	0.0108525
SLC35F3	1.81299	0.0108525
SEMA3G	1.04636	0.0108616
SAA1	1.43473	0.0109063
CBX7	0.741526	0.0110206
AC131025.8	1.14976	0.0110573
SCN4B	1.22305	0.0111734
EVA1A	0.807482	0.0112303
MFGE8	1.01526	0.0112514
FHL3	0.90248	0.0112757
KLHL7	0.76552	0.0112757
RPL3P4	1.37843	0.0112954
COL17A1	1.65422	0.0116083
FAM3D	1.93824	0.0116083
NNAT	1.65789	0.0116083
RP11-379F4.9	1.54856	0.0116083
SPHKAP	3.11257	0.0116488
LINC00478	1.06246	0.0116579
LRRC18	2.48356	0.0116776
BACE1	0.726601	0.0117535
PRSS3	2.72679	0.0120915
ECHDC3	0.972413	0.0121063
NTN5	1.16587	0.0121273
ARHGAP19	1.13047	0.0121524
SASH1	0.861701	0.0123317
SESN3	1.12368	0.0123342
AC010980.2	2.20215	0.0123639
LYSMD4	1.03448	0.0123639
COL6A6	2.0369	0.0123833
PLEKHS1	1.13953	0.0123894
PCYT1B	1.70032	0.0124377
APCDD1L-AS1	2.37175	0.0124485
CLDN11	1.30916	0.0124803
KDR	1.12681	0.0124803
ASPRV1	1.12294	0.0126342
EGFLAM	1.15281	0.0126532
HLA-DRB5	2.75588	0.0127048
CDIP1	1.14027	0.0127087
IGHA1	1.87012	0.0127247
RNF112	1.21585	0.0127625
AMT	0.870051	0.0128297
RNU2-6P	2.23325	0.0128333
RCVRN	1.98331	0.0128609
DNAJB5	1.11345	0.0129954
FSCN1	1.17103	0.0130069
CSRNP3	1.51901	0.0130206
AC016735.2	1.70963	0.0131131
ANKFN1	1.88021	0.0131686
STMN4	1.90004	0.0132088
EDN1	1.0207	0.0135301
EPB41L2	0.900932	0.0135427
CLEC2L	1.82359	0.0135515
CD34	0.956967	0.0137038
CTD-3088G3.8	1.1005	0.0138182
FGF7	1.35808	0.0138182
PTH2	4.74394	0.0139166
SYNM	1.61092	0.0139166
SGCB	0.770301	0.0139455
AKR1E2	1.28134	0.014002
GPRASP1	1.25298	0.0140077
SNHG15	0.937458	0.0140077
VAT1L	2.66308	0.0140162
RP11-429A20.4	3.10395	0.0140764
FAM57A	0.820402	0.014155
C7orf61	1.345	0.014404
SLC16A8	1.18606	0.0145556
AMOTL2	0.91407	0.0146623
JUNB	1.30976	0.0147101
TGM5	3.05834	0.0147374
FAM110D	0.964838	0.0147641
SNED1	0.964266	0.0147753
AC074289.1	1.5883	0.0148047
SYT8	1.40341	0.0149235
TAC1	2.24944	0.0149235
RPS23	0.774569	0.014993
RPL5	1.19597	0.0150066
RP11-481H12.1	1.47425	0.0150111
RP11-385F5.4	1.06359	0.0152457
PLD1	1.01756	0.0152599
KLF15	1.37815	0.0152606
COL7A1	0.754277	0.0152951
ADAMTS8	1.5107	0.0152994
PLXDC1	0.939698	0.0152994
DNAJC18	0.751455	0.0153031
CTD-2086L14.1	1.44902	0.0154925
EFEMP2	0.717509	0.0155865
TTC23	0.818395	0.0156112
NMB	1.23235	0.015628
UCK2	0.874475	0.0157317
CTTNBP2	1.26095	0.0158629
PIM1	1.26942	0.0158629
FAM20C	0.779888	0.0158704
KIF7	0.944488	0.0158704
MIR503HG	1.51158	0.0158833
ATP1B2	1.08943	0.0158884
RP11-5C23.2	1.46	0.0158984
CEBPB	0.887697	0.0159115
C10orf10	1.31181	0.0159714
PRNP	1.04425	0.01599
ALDH1L1	1.61644	0.0160642
CTA-14H9.5	1.17207	0.0160642
ZFP36	1.4029	0.0161023
TMCC1-AS1	1.19895	0.0161909
HSD11B2	1.22601	0.0162067
CPA1	2.00965	0.0162109
APBB1	0.692622	0.0162227
HADH	0.750421	0.0162448
SCN2B	1.45118	0.0163628
ABCA6	1.03724	0.0163648
CTSG	1.37018	0.0166625
ADIPOQ	2.2064	0.0166782
DUSP26	1.99245	0.0166972
AQP5	2.12297	0.0167315
SPON1	1.06456	0.0167891
TXNRD3	0.901386	0.0168414
ZNF133	1.09367	0.0168414
SMO	1.08359	0.0172754
PGM5	1.03142	0.0173977
ERG	0.852938	0.0173994
PGF	0.656957	0.0173994
SOD3	1.21237	0.0174682
ZNF423	0.874193	0.0175998
SOX7	1.10976	0.017625
EPHB1	1.23332	0.0176601
RPS28	1.70037	0.0176601
RP3-406A7.7	0.915198	0.0177291
PLIN4	1.80102	0.017992
LINC00092	2.82804	0.0180807
MRC2	0.948917	0.0184581
RP11-339B21.13	1.01888	0.0185132
SLC43A3	0.883904	0.0185132
ARHGEF4	0.827586	0.0185225
RP11-402J6.1	2.83364	0.0185441
RP5-1051J4.4	1.79361	0.0185523
TSGA10	1.20155	0.0186257
PDZRN3	0.883017	0.0186735
N4BP2L1	0.800914	0.0187759
GPD1	1.85757	0.0188847
BNC1	3.06261	0.0189708
RP11-613M10.6	1.10816	0.0190239
TINAGL1	1.0876	0.0194649
MOB3B	1.0738	0.019605
RP5-1039K5.16	2.12092	0.0196543
FCGRT	0.889132	0.0200357
APP	0.841004	0.0200759
LIFR	1.03972	0.0200815
FGFBP1	2.67085	0.0202651
RPL34	0.792109	0.0202651
RP5-1024C24.1	2.91884	0.0202832
OLFM4	2.2448	0.0206062
CYB5R2	0.79732	0.0206064
SLC7A10	1.26347	0.0208619
TAGLN	1.18574	0.0209105
AL928768.3	1.63433	0.0209294
DRD2	1.68002	0.0209294
CTF1	1.24155	0.0209531
DLL1	1.2907	0.0209531
PTGS2	1.86338	0.0210639
SNHG8	0.768366	0.0210639
SPARCL1	1.02938	0.0212
ROBO4	0.838846	0.0214707
DEFB124	2.02642	0.0216729
MEIS2	1.09669	0.0216729
MED28	0.492675	0.0217246
WSCD1	1.20176	0.0221687
RBP4	2.26006	0.022234
TNNT3	1.03124	0.022234
NPAS4	1.54447	0.022333
ST5	1.11781	0.0223961
KIRREL	0.920015	0.0224988
AOC3	1.13707	0.0226582
ZHX3	0.820461	0.022707
ADM	1.29835	0.0227249
MOCS1	1.10003	0.0227249
EIF3D	1.03446	0.0228284
TMEM88	0.769008	0.0228304
SNAI2	1.23091	0.0230037
WASF3	1.02314	0.0230406
H3F3B	0.833327	0.0232266
SLC6A10P	2.55647	0.0232913
NFKBIA	0.785384	0.023457
CC2D2A	0.804952	0.0235236
NCOA1	0.577879	0.0235863
RP11-923I11.6	1.34675	0.0235863
RP11-830F9.5	2.14907	0.0236425
ZNF92P3	2.56943	0.0236864
RBPMS	0.606121	0.0237129
GPX3	1.22729	0.0246433
RIMS3	1.00606	0.0247156
RAB40B	0.592873	0.0247264
TP53AIP1	1.3251	0.0249341
CACNA1G-AS1	1.82642	0.0250167
MLH3	0.644131	0.0250167
SCARB1	0.735934	0.0250167
SLC27A6	1.99252	0.0250167
LZTS1	1.05671	0.0250506
RP11-244O19.1	1.22277	0.025058
RPS7	1.54752	0.0252357
HOTAIRM1	1.16727	0.0254105
MICU3	1.16562	0.0255404
TMPRSS5	1.1512	0.0256527
COLCA2	1.43741	0.0258062
TFPI	1.23809	0.0258062
NPHP3	0.706739	0.0258821
SCN4A	0.945688	0.0258821
ZNF830	0.828102	0.0258821
RP11-554A11.6	2.00409	0.0259858
GDF10	1.87627	0.0261553
PEAR1	1.09876	0.0262752
FAM107A	1.38348	0.026276
RPL35A	0.981863	0.0263032
GPSM1	0.784583	0.0263193
MYBBP1A	0.764101	0.0263738
RP11-736N17.4	2.04316	0.0264423
ADAMTSL3	1.30673	0.0265426
FBXO32	1.05508	0.0268837
PHLDB1	0.809886	0.0268837
RP11-490M8.1	1.51335	0.0270171
FLT4	0.879737	0.0270793
CTD-3193K9.4	2.22739	0.0271468
MYH3	0.829352	0.0271468
HOXA2	1.57729	0.0271797
DACT3	1.1582	0.0271923
ADCK3	0.875313	0.0271971
LDB2	1.30439	0.0272811
FZD9	1.43983	0.0274753
NLGN4X	1.18471	0.0274999
BCAN	1.71044	0.0276705
MAP1A	0.995657	0.0277093
CNN2	1.12286	0.0277526
PTGER4	1.1507	0.0277526
SPRY1	0.80522	0.0277526
TERF2IP	0.662927	0.027976
AC147651.3	1.33069	0.0280979
PDGFRL	1.14849	0.0281264
RP11-107N15.1	1.27895	0.0282558
AIF1L	1.12788	0.0283625
RP11-61I13.3	1.3933	0.0284312
RP11-435O5.5	1.51076	0.0284418
IFFO2	1.04809	0.0286413
AC093822.1	3.7448	0.0287863
GNE	1.05746	0.0287863
HPSE2	2.24418	0.0287922
TANK	0.801172	0.0289993
PKD2	0.788829	0.0290704
AC026904.1	1.78158	0.0291477
ODF3L1	2.44197	0.0292162
KIAA1614	0.743602	0.0293625
FAM124A	0.998415	0.0294178
CEBPD	0.960097	0.0296321
PLAC9	1.05126	0.0297026
HAS3	1.26134	0.0298039
SCG5	1.73646	0.0298087
CYP2U1	1.14474	0.029877
IPO5	0.593831	0.029877
AFP	2.68768	0.0299039
OLFM2	1.13886	0.0300675
PDGFRB	0.774868	0.0301813
MARK1	1.33326	0.0302496
PDE5A	1.11276	0.0304124
MEG9	1.29665	0.0304605
ARHGAP6	1.0287	0.0306929
FNDC5	1.02054	0.0307093
ISLR	1.24121	0.0308851
ZNF248	0.684854	0.0308851
MTHFD1L	0.604894	0.0309275
RPL4	1.24999	0.0309327
USP53	0.712772	0.0309708
RP11-77E14.2	1.81696	0.0309734
RPL24	0.695666	0.0310244
AC006946.16	1.58997	0.0311552
SAT2	0.721541	0.0312277
NGFRAP1	0.691763	0.0312725
PRKAR1B	0.831259	0.0313984
AC004453.8	1.21205	0.031661
ANTXR2	0.893613	0.0316927
FAM126A	1.07499	0.0316927
TYRO3	0.759836	0.0317391
RP11-474O21.5	1.76348	0.0317495
CDCA7L	1.18962	0.0322007
NXN	0.898636	0.0322007
C3orf58	0.951459	0.032233
PPL	0.8839	0.0323406
AP000662.4	2.09515	0.0324101
GFRA2	0.913958	0.0324768
FAM212A	0.909466	0.0326186
CTC-398G3.1	1.48987	0.0326534
EBF1	1.09918	0.0328828
RP11-875O11.1	1.68388	0.0328828
PRRG3	1.57634	0.0329085
KCNK3	1.51897	0.0329528
SLC16A4	0.828179	0.033114
NYAP1	2.06573	0.0331567
TMEM55A	1.15232	0.0331676
AC005356.1	1.73123	0.0332363
CTB-107G13.1	2.10593	0.0332363
L3MBTL4	1.25238	0.0332363
ALDH1A3	1.10008	0.0333959
ENOX1	1.16057	0.0335587
PLK3	0.894704	0.0335587
SLC27A1	0.870102	0.0335587
RPL22	0.712796	0.033942
C12orf68	1.1064	0.0339701
RP11-492E3.2	1.37098	0.0341106
FBXO31	0.680011	0.0342158
TP73-AS1	0.6576	0.0343462
OR7E22P	3.06095	0.0343516
AL117190.3	1.83696	0.0343712
EGR3	1.29918	0.0344282
CYP39A1	1.96193	0.0345547
JAG2	0.679261	0.0347072
LSP1	0.721468	0.0347072
HOXA3	0.815424	0.0348132
SNCG	1.17041	0.0348421
RPS4X	0.983504	0.0349384
IRAK1BP1	1.19935	0.0350869
IGKC	1.47581	0.0351423
TBX18	1.1303	0.0351423
HNF1A	1.88309	0.0357579
KCNIP2-AS1	2.58189	0.03579
FBLN1	1.0609	0.0358019
SLC16A11	1.26553	0.0359218
IGLV2-11	2.69426	0.0359856
AC147651.1	2.37029	0.0362092
CSRNP1	1.12002	0.0362536
TVP23C	0.943795	0.0363508
IGLV2-14	2.73718	0.0364516
LEPR	1.33293	0.0364526
RP11-696F12.1	1.63871	0.0364526
RP11-267J23.1	2.28621	0.0365995
RP11-66B24.4	1.25354	0.0368475
SOCS3	1.41534	0.0368562
TBX15	1.14847	0.0368562
RP11-22B23.1	1.37658	0.0369708
RPRM	2.69951	0.0370946
SFRP5	2.76761	0.0371257
ZBED3	0.737209	0.0371257
RPS24	1.06721	0.037153
CPNE2	0.820856	0.0371552
CCDC136	1.02409	0.0373216
GPR3	0.952497	0.0374214
AADAT	1.15825	0.0374255
SLC26A4	1.68843	0.0374255
TGFB1I1	0.772383	0.0375922
RP11-70P17.1	1.04337	0.0376351
ALKBH2	0.996037	0.0376445
LIAS	0.830472	0.0377405
PRR7-AS1	1.65161	0.0377405
TRO	1.22341	0.0377592
ARHGEF9	0.638265	0.038153
RP11-848P1.5	1.95782	0.0382283
AC096772.6	0.910263	0.0382346
LONRF1	0.937606	0.0382346
PCOLCE2	1.9045	0.038326
TNFSF12	0.912987	0.0384198
NR4A1	1.38674	0.0385252
CA6	1.93532	0.0386187
NMT2	0.752393	0.0386187
HTR2A	1.62855	0.0386786
JAM3	0.901732	0.0387754
CALB2	1.48285	0.0387943
GLI2	1.13861	0.0388729
CYYR1	1.00359	0.0389096
GNB2L1	0.986009	0.038942
MAP2K3	0.90824	0.0389697
PRSS21	1.38723	0.0390929
WDR86-AS1	1.23732	0.0393838
NXNL1	1.72334	0.0394206
AKR1C3	1.14841	0.0394737
ASPA	1.14977	0.0394737
GULP1	1.03183	0.0394737
C1QL4	1.93528	0.0397885
KANK1	0.686142	0.0397885
C1S	0.78077	0.0398493
DUS3L	0.691879	0.0398493
MAPKBP1	0.57601	0.0398493
PABPC4L	1.1975	0.0398571
ZNF554	0.817037	0.0398571
RNU1-19P	2.5928	0.0398688
RP11-6O2.3	2.71848	0.0399407
HNMT	0.786026	0.0402657
SSBP3	0.579541	0.0402701
RPS21	1.14438	0.0404723
UBAP1L	0.675583	0.0404967
IL34	0.893635	0.0405176
TMEM220	0.952376	0.040535
EBPL	0.719446	0.0405575
TGM1	0.755673	0.0405575
RPS5	0.978998	0.0406238
LAMA3	1.12911	0.0408126
DMRT2	1.81912	0.0412714
IGLV2-23	2.43806	0.0414236
OFD1	0.762411	0.0416619
AGFG2	0.584252	0.0418115
GPR162	0.928476	0.0419049
EFEMP1	1.04991	0.0421064
SRF	0.815235	0.0421235
IGLV2-8	2.28426	0.042318
CLDN19	1.39596	0.0425117
CRTAP	0.675502	0.0427406
ZBTB16	1.50702	0.0427856
MST1	0.740244	0.0427932
RP11-276H19.1	1.80413	0.0429406
TIMM44	0.574467	0.0432425
CHRNB2	1.33252	0.0435515
TUB	1.12797	0.0436079
CTB-178M22.2	1.09263	0.0436389
NR4A3	1.6208	0.0437415
PRSS30P	1.41089	0.0437821
SERPINF1	1.12754	0.0437834
GYLTL1B	0.829909	0.0440434
GATA6	1.09848	0.0440704
TMEM18	0.625871	0.0441035
TIMP3	0.660843	0.0441408
DHX38	0.692669	0.0441843
LINC01111	1.63115	0.0443839
PURA	0.62256	0.0443839
NFASC	0.809634	0.0446237
USP11	0.67362	0.0446585
RPL30	0.709113	0.0447027
CWF19L2	0.877133	0.0449039
ALDH1A1	1.18102	0.04497
RPL10	0.988318	0.04497
PRICKLE2	0.895414	0.045086
RPL21P75	2.36916	0.045086
SDK1	0.901947	0.0450988
EIF3L	0.548539	0.0453041
ESPNL	1.27096	0.0454615
ADORA1	1.23865	0.0455342
PID1	1.10399	0.0456154
RHOXF1	1.46956	0.0458661
ARID5A	0.78876	0.0460783
DUSP2	1.33676	0.0461141
TMEM221	0.839566	0.0461141
RP11-734J24.1	1.4044	0.0464993
PCK1	2.23424	0.0465101
RPL12	1.05107	0.0465296
GRID1	0.956131	0.0469389
PAX8-AS1	1.45194	0.0469389
SLC5A1	1.38686	0.0470794
AC112715.2	1.68814	0.0474225
BRINP1	1.78555	0.0475953
TP53	0.874283	0.0478503
BICC1	1.08198	0.0479689
CA2	1.76611	0.0480918
ACVRL1	0.631908	0.0483772
PPP1R3G	1.60693	0.0483892
MSI1	1.18637	0.0483976
ACACB	0.928353	0.0483988
SMAD3	0.563823	0.0484601
TAB1	0.593831	0.0489271
GPR153	0.751347	0.0493903
HYAL1	0.958274	0.0496949
YBX1	1.35587	0.0497327
TBC1D4	0.958106	0.0497723

## Sheet: STAR_edgeR_up_Normal_vs_DCIS
Gene ID	log2FC (NvD)	p-value
NDRG2	2.1429	3.31229e-09
SOX8	3.22504	3.37382e-09
CENPV	2.27267	1.55049e-08
RGMA	2.65644	1.7849e-08
CACNA1G	2.67087	3.29059e-08
KIT	2.80737	3.32065e-08
FAM13A	1.88894	4.12772e-08
TRIM2	1.89428	4.23932e-08
SRPX	2.67656	5.04149e-08
ADCYAP1R1	2.71183	5.2298e-08
ALX4	2.73614	7.46402e-08
RSPO1	3.75938	7.90829e-08
RHOJ	1.8356	1.09042e-07
RP11-161M6.2	2.34104	1.28277e-07
CCL28	3.00576	1.63367e-07
APBA1	1.90088	1.88084e-07
RASGEF1C	3.51437	1.96439e-07
AC016995.3	4.64005	2.00155e-07
KCNH3	2.28865	2.13397e-07
GPC3	2.2945	2.17949e-07
RP11-292F22.7	4.70054	2.28347e-07
ETV3L	4.59601	3.4148e-07
SOX10	3.5346	4.01242e-07
CX3CL1	2.32685	4.62817e-07
CYP11A1	2.28061	4.64305e-07
CRYAB	2.19855	4.78217e-07
ROPN1B	4.32411	5.2286e-07
OLFML2A	1.73676	6.23856e-07
ADAMTS5	1.96132	6.44202e-07
LAMC3	2.19453	6.55461e-07
LEPREL1	1.51422	6.855e-07
FBLN5	1.36243	6.8809e-07
RP11-154D6.1	2.78871	6.9259e-07
CCDC8	1.77256	6.99974e-07
PRDM8	2.02715	7.41932e-07
DENND2A	1.65787	7.837e-07
RP11-93B14.5	4.79084	1.04875e-06
WDR86	1.8773	1.06665e-06
RECK	1.53094	1.16062e-06
FAM20A	2.11576	1.16493e-06
CAPN6	3.07672	1.24837e-06
C2orf82	3.7322	1.26895e-06
EEPD1	1.64283	1.30969e-06
COL23A1	1.88964	1.3241e-06
TCF7L1	1.58383	1.33352e-06
PNMAL2	1.40431	1.74343e-06
PIGR	4.31792	1.78227e-06
OSR1	1.99383	1.96302e-06
MFI2	1.87373	2.30663e-06
CNN1	2.14587	2.47152e-06
YPEL4	1.65121	2.50492e-06
TTYH1	3.29058	2.60338e-06
GAS7	1.38741	2.68944e-06
CD300LG	2.22628	3.01092e-06
IGF2-AS	2.48834	3.09515e-06
CASC8	4.90433	3.28026e-06
DLK2	2.73803	3.48519e-06
MAML2	1.80513	3.67977e-06
IRX1	2.6312	3.70958e-06
RP11-332H18.4	1.31329	3.97515e-06
PDE9A	1.98788	3.98031e-06
EXTL1	2.47075	4.29894e-06
BTNL9	1.60014	4.69811e-06
TPT1-AS1	1.26339	4.75308e-06
NOB1	1.08659	4.81871e-06
NEURL3	2.99788	5.04527e-06
SFRP1	2.57751	5.0785e-06
TMEM132C	2.33245	5.25604e-06
KLF5	2.07305	5.32164e-06
FZD7	1.63312	5.76403e-06
S100B	2.10463	6.11282e-06
LINC00640	2.88119	6.36609e-06
FMO1	2.05268	6.67704e-06
TWIST2	2.55157	6.71637e-06
MAF	1.26978	6.75128e-06
RP11-211G23.2	4.02863	6.828e-06
SLC13A2	3.17763	7.32832e-06
GABRP	2.91251	7.4571e-06
WNT6	2.02513	7.65658e-06
KIF26A	1.34219	7.6755e-06
FAM150B	3.56769	7.90154e-06
NRG2	2.14766	8.33028e-06
KRT15	3.76337	8.45911e-06
PTPRH	2.13032	8.68621e-06
CORO2B	1.94889	8.90161e-06
NES	1.12951	9.59107e-06
RASL10A	2.50019	9.62745e-06
IL1RL2	1.96196	9.97271e-06
HAPLN3	2.09236	1.03755e-05
FREM1	2.72701	1.07857e-05
AC097724.3	2.83668	1.09561e-05
SPRY2	1.71886	1.13667e-05
ALPL	1.93967	1.17579e-05
HIC1	1.63428	1.2055e-05
CAPN11	2.021	1.27112e-05
SEMA5A	1.53461	1.39644e-05
PDGFA	1.43092	1.46126e-05
C17orf51	1.45566	1.48552e-05
PPAPDC3	1.55244	1.58295e-05
TESC	1.91408	1.61375e-05
OXTR	2.35934	1.63817e-05
KCNIP3	1.21697	1.66665e-05
ANO1	1.24786	1.68511e-05
EDNRB	2.09155	1.77133e-05
ABCA10	2.02989	1.77988e-05
ALDH7A1	1.15	1.78809e-05
PCDH18	1.9221	1.96791e-05
DLK1	4.12687	1.98096e-05
PTH1R	1.50768	1.99148e-05
PTPRG	1.25133	1.99832e-05
EFNB1	1.39305	2.05024e-05
PRSS50	1.88848	2.1029e-05
GALNT16	1.70666	2.11458e-05
PKP1	2.49766	2.16244e-05
ANGPTL4	1.75726	2.16928e-05
BMP7	1.80097	2.37271e-05
ROBO3	1.5261	2.5347e-05
EMILIN2	1.62134	2.74105e-05
ADAM33	1.60363	2.80355e-05
COLCA1	2.09276	2.8187e-05
LHFPL2	1.66418	2.85396e-05
KANK4	2.01085	2.89502e-05
PDGFRA	1.536	3.00775e-05
CHRDL1	2.07393	3.01883e-05
CD164L2	1.91858	3.16354e-05
NFIB	1.22233	3.1647e-05
FIGF	3.02177	3.21211e-05
FXYD6	1.55278	3.35511e-05
PRR4	1.65141	3.36129e-05
CDKN1C	1.55627	3.37362e-05
FGF1	1.7738	3.42811e-05
SAV1	1.11979	3.45568e-05
IL11RA	1.3312	3.56112e-05
NRXN2	1.29572	3.68675e-05
RASL12	1.56561	3.85271e-05
MME	1.52616	3.85831e-05
ECEL1	3.60438	4.19909e-05
PPP1R14A	1.39666	4.28807e-05
FAM189A2	1.71506	4.47828e-05
ETV6	0.987509	4.56465e-05
SOBP	1.47514	4.58396e-05
FAXDC2	1.32874	4.70655e-05
GPRC5B	1.47893	4.82767e-05
APLN	2.25118	4.83469e-05
EPHA2	1.39088	4.86126e-05
MYRF	1.69433	4.88066e-05
OLFML3	1.44286	4.92274e-05
TRNP1	2.03522	4.96891e-05
ITIH5	1.43275	5.04665e-05
LRRN4CL	1.55451	5.16907e-05
ADAMTS12	1.41688	5.42871e-05
RAB3IL1	1.22893	5.53438e-05
C1orf61	3.28832	5.54146e-05
CDH4	2.08025	5.70841e-05
TMEM213	3.24446	5.81255e-05
NDN	1.4037	5.9536e-05
DAPK2	1.07788	6.02592e-05
KLK1	2.24555	6.08916e-05
CD248	1.31877	6.12598e-05
PHLDA1	1.49714	6.26741e-05
HAND2-AS1	1.76793	6.33715e-05
NAALADL1	1.51408	6.45935e-05
USP2	1.47501	6.57102e-05
TNNI2	1.6103	6.65386e-05
PLAGL1	1.60371	6.71105e-05
IL15RA	1.61699	6.73125e-05
TMEM158	1.84989	6.75578e-05
KCNIP1	2.28884	6.87654e-05
NLGN2	1.00967	7.02522e-05
INSRR	1.93154	7.03101e-05
STAT5A	1.59366	7.12798e-05
SLC34A2	2.46379	7.46126e-05
MYEOV	3.23222	7.54427e-05
TPTEP1	1.64435	7.57424e-05
PLK5	2.38422	8.15807e-05
GSN	0.980029	8.32085e-05
TPM2	0.988341	8.36809e-05
TMEM130	1.87851	8.44519e-05
SOSTDC1	2.88815	8.78795e-05
ANKRD35	1.46878	8.84911e-05
CSN3	6.57496	8.86216e-05
SOX15	1.63725	8.89463e-05
ETV5	1.66434	8.90041e-05
GFAP	3.44003	8.96268e-05
KCNMB1	1.62733	8.9704e-05
RP11-469H8.6	3.33602	9.33694e-05
PRIMA1	2.36361	9.42097e-05
PIK3R1	0.981983	9.58965e-05
TSHZ2	1.42329	9.59329e-05
KCNN4	1.80957	9.85732e-05
NID1	1.56578	0.0001069
RYR1	1.395	0.000106955
CNTN1	1.82239	0.000108217
LRRC38	3.59271	0.000108584
ASIC1	1.55793	0.000111431
CMTM7	1.24736	0.000113148
CLIP3	1.08975	0.000113635
ALS2CL	1.01556	0.00011386
TNFRSF21	1.4761	0.000114283
PAMR1	1.44671	0.000117495
ELF5	2.41582	0.000118809
ZMYND15	1.01043	0.000120076
COL15A1	1.39075	0.000120106
GGTA1P	1.45978	0.00012117
CXCL12	1.49278	0.00012135
MT1M	2.34376	0.000121537
NYNRIN	1.22695	0.000122822
CMTM5	2.31608	0.000125653
GLTSCR2	1.10274	0.000126136
SIRPA	1.28917	0.000126229
CDKN2C	1.15732	0.000128117
MIR143HG	1.5861	0.000131213
HRCT1	1.86159	0.000132255
LINC00842	2.83037	0.000133617
TRIM29	1.5104	0.00013618
CCNB1IP1	1.47657	0.000136776
PTPRZ1	2.11291	0.000137126
PRRX2	1.26815	0.000138274
APCDD1L	2.7325	0.000138643
BDKRB2	1.52982	0.000141632
KCNIP2	2.33119	0.000141638
TNN	1.74895	0.000148502
C17orf49	1.22722	0.000149466
ZNF462	1.13241	0.000159491
ASTN1	2.40429	0.000162083
NTRK1	1.70193	0.000164547
F10	1.48309	0.000167488
SLC17A7	2.31304	0.000170928
DZIP1	1.49266	0.000171314
RCAN1	1.37376	0.00017453
DUSP9	2.94122	0.000175176
KCNMB4	1.44673	0.000176038
EYA2	1.6809	0.000182976
FOLR1	2.90899	0.00018405
INPP1	1.3253	0.00018844
PHLPP1	1.19345	0.000188471
EGR1	2.14892	0.000190067
FMO2	1.4288	0.000191309
NSG1	1.71639	0.000193279
TCEAL7	1.84548	0.000194127
AMN	2.39095	0.000196666
DPP6	1.29287	0.000198885
EPB41L4A-AS1	1.12544	0.00019997
TMEM178A	1.47073	0.000199995
KCNQ4	1.91133	0.000204704
NPM2	1.74179	0.000205757
EGFR	1.50521	0.000205857
TCF7L2	1.13839	0.000207572
PDZD4	1.08762	0.000207653
C1RL	0.83826	0.000214068
LOXL4	1.91609	0.000215075
CHRM1	2.46927	0.00021639
CCDC102A	0.979004	0.000216871
MYC	1.4265	0.000217213
RELN	2.40794	0.000217827
LZTS3	1.50948	0.000219336
STAT5B	0.662071	0.000221449
PLEKHG4	1.21293	0.00022505
COLGALT2	1.68214	0.000229253
ARHGAP26	1.34453	0.000233214
DMD	1.37665	0.00023414
DCX	2.82121	0.000234649
KLHL29	1.31221	0.000234932
PADI2	1.92389	0.000235429
CDC20P1	2.16032	0.000237188
MYL3	2.35512	0.000237461
FAT2	1.86954	0.000237725
FGF2	1.68885	0.000245204
LMOD1	1.39559	0.000246174
ATL2	0.952776	0.000246783
PENK	4.22482	0.000247132
MUC4	2.76455	0.00025165
IGF1	1.92499	0.000256653
RPS20	0.874102	0.000257645
WIF1	3.25823	0.000268861
CA4	2.21015	0.000278444
RP1-193H18.2	1.78377	0.00028365
HSPB2	1.50086	0.000285115
SLC2A4	2.02889	0.000285306
WASF1	1.19421	0.000289189
SCARA5	1.95337	0.000289799
CDX1	2.42538	0.000293214
NEURL2	1.10517	0.000304936
FZD1	0.887017	0.000307934
PDE1C	1.83733	0.000317769
AP001816.1	1.19112	0.000321628
FBXO17	1.18924	0.000321732
PAK3	1.60135	0.000326758
FGFR1	0.977879	0.000331457
RGAG4	0.964823	0.00033475
PELI2	1.26402	0.000334767
NRG1	2.15422	0.000340179
MIR145	1.48501	0.00034155
SLC25A27	2.02034	0.000343504
PDLIM4	1.11253	0.000344975
SH3PXD2B	1.30343	0.000347467
SORBS1	1.46153	0.000349216
SLIT3	1.11871	0.000350533
S100A1	2.02568	0.000353086
LAMB3	1.56887	0.000354082
ARAP3	0.782455	0.000362299
TMEM59L	1.80254	0.000363838
ARRDC3	1.82825	0.000367226
GPR144	3.06675	0.000368177
PRX	0.790214	0.000368262
XPNPEP2	2.00436	0.000380581
AC027612.6	1.46387	0.000382725
BARX1	1.80394	0.000385806
LINC00086	1.65539	0.00038985
ARHGEF40	1.09299	0.000393653
GALT	1.0612	0.000394073
CCL21	2.01487	0.000396635
PLA2R1	1.20154	0.000410729
PRCD	1.15176	0.000428158
CTD-2369P2.2	0.721767	0.000431279
TMPRSS2	1.68598	0.000431332
GPR97	2.25178	0.000435467
PLCL2	1.34882	0.000441017
GNG7	0.914596	0.000452682
HOXA-AS2	1.22559	0.000456228
BCL11A	1.63456	0.000458819
FLNC	1.49233	0.00046272
GSTM2	1.4591	0.000467569
PLSCR4	1.14249	0.000469391
TNNC2	0.989529	0.000477725
KLK10	1.98138	0.00048742
SMARCD3	0.880379	0.000491514
AQP7	2.17398	0.000505648
CPED1	1.28779	0.000509767
SNX32	1.62784	0.000514572
PLXNA4	1.45077	0.000515907
CD36	1.77991	0.000520809
G0S2	2.56717	0.000521669
RARRES2	1.13578	0.000528063
CSRP1	1.04204	0.000534915
CSF1	0.841784	0.000541013
FZD10-AS1	1.30174	0.000541928
LIMS2	0.926255	0.000549574
PPP1R1A	1.95957	0.000555474
APCDD1	1.38034	0.000566714
GRAMD3	1.1148	0.00056768
PTPRN	3.35165	0.000572006
NLE1	0.982802	0.000587373
LAMB1	1.10609	0.000595465
IRS2	0.946495	0.00059579
MT1L	1.43871	0.000601585
PLTP	1.59097	0.000610769
AF131215.9	1.23812	0.000612179
SSBP2	1.00803	0.000613279
LAMA2	1.03604	0.000616283
POLR1E	1.1636	0.000627083
TGFBR3	1.32266	0.000632479
AHDC1	0.784951	0.000633343
RNU1-88P	3.58123	0.000633378
BOC	1.36568	0.000636986
FAM43A	0.890937	0.000637117
NTRK3	1.51009	0.000638111
DPYD	1.10928	0.000641317
AC006116.20	1.73263	0.000646512
EDA	1.52748	0.000646701
CRMP1	1.43257	0.000648084
MAFF	1.29235	0.000650832
MMP19	1.54448	0.000655172
FOXO1	1.0601	0.000656704
C2orf88	1.81769	0.000660543
JUN	1.25347	0.000668245
IQSEC3	1.19005	0.00068027
MFAP4	1.41137	0.000690119
C1R	1.07204	0.000699824
ANKRD53	1.23874	0.000700256
RNF150	1.06155	0.000702086
CPAMD8	1.61114	0.000720554
SAA2	2.13745	0.000722298
ARID5B	0.897523	0.000728615
EPHB3	1.39143	0.000729944
CDH23	1.05825	0.000733163
PDGFD	1.32078	0.000745306
LRFN5	2.07539	0.000754211
CECR7	1.74393	0.000755202
SLC6A14	2.61596	0.000779588
ACTR3B	1.40115	0.000798184
EFNB3	1.89704	0.000807946
LIF	1.84306	0.000811736
ICAM5	1.56065	0.000815455
FOSL1	1.94122	0.000827293
AC124789.1	1.51373	0.000842763
KLHL13	2.1416	0.000846788
CDC42EP5	1.09729	0.000849382
TF	2.31779	0.000852929
CLDND2	1.20512	0.000854836
HPS5	0.907817	0.000864549
TEPP	1.67337	0.000880129
RASL10B	1.80622	0.000882133
IGLL5	2.08223	0.000887124
FBL	1.22311	0.000889235
ATOH8	1.52154	0.000890337
EVC2	1.26992	0.000899229
TNS4	1.35303	0.000903582
C2orf40	1.83751	0.00091254
GNB5	0.898735	0.000916359
LY6D	3.0421	0.000935892
PLEKHH2	1.30163	0.000937238
PTRF	0.869855	0.00093828
ERCC5	0.808301	0.000953742
PDPN	1.02654	0.000955589
CHST2	1.21082	0.000957022
FGF17	1.57498	0.000964936
PIANP	1.94949	0.000978902
DAB2IP	0.976501	0.000993171
LRP1	1.13616	0.00100463
Z83851.1	1.54503	0.00100886
C10orf54	0.86644	0.00101092
CNTFR	1.61092	0.00102408
C3orf17	0.90993	0.001025
STAC2	2.34795	0.0010416
WDR27	0.829643	0.00104226
SLC7A3	2.09635	0.00105136
KANK2	0.922927	0.00105229
FAM184A	2.02194	0.00106099
SERPING1	1.29979	0.00106847
GLIPR2	0.996328	0.00106999
TNFSF11	3.93957	0.00108567
RPL32	0.936379	0.00108614
ITM2A	1.62063	0.0010871
CLDN8	1.85463	0.00109333
TSSC2	1.70752	0.00109538
RP4-665J23.1	1.38155	0.00110271
GPR124	1.64508	0.00113157
MEST	1.42326	0.00113184
SYDE1	0.899233	0.00113265
MAB21L1	1.64077	0.00113271
SPTBN1	0.828214	0.00114105
CXCL6	2.41727	0.00114634
SEMA6D	1.6774	0.00115326
DCHS1	0.871951	0.00115724
GAS1	1.17679	0.00117865
PNRC1	0.985561	0.00117938
SH3BGR	1.29484	0.00119733
HAP1	1.7383	0.00119787
NT5C3B	0.890128	0.00120275
KRT5	1.81714	0.00121991
HAND2	1.52776	0.00122131
TNFRSF8	1.40959	0.00122539
ADAMTS1	1.37644	0.00122829
MT1A	2.39769	0.00123846
TSHZ3	1.13182	0.00123857
RILPL2	0.993817	0.00125253
NRTN	1.27977	0.00125388
CFD	1.49796	0.00127119
TNNI1	2.55883	0.00130681
FAM211A-AS1	1.04845	0.00130792
LGR6	1.47811	0.00132293
SDC3	1.05611	0.0013484
EEF1B2	0.853508	0.00135116
FANCE	0.868771	0.00135431
AMIGO2	1.24383	0.00138127
KLK2	4.20616	0.00138261
MAMDC2	1.44007	0.00138847
MMP16	1.5867	0.00138978
MMP7	1.78747	0.00139503
RPL13	1.38815	0.00140656
ST8SIA1	1.20833	0.001407
CLMP	1.07786	0.00141386
PTPN14	0.843465	0.00143525
AKAP12	1.36483	0.00143815
RP11-130L8.2	1.09484	0.00146262
ABCA9	1.36488	0.00147537
ST8SIA2	2.22502	0.00149268
GPM6B	1.39268	0.00150954
MYLK	1.09508	0.00152883
PER1	1.65712	0.00153108
MIR497HG	1.64122	0.00153153
CAPN5	0.858824	0.00153597
BBOX1	2.25253	0.00154652
SERPINB5	1.49399	0.00154656
SHMT1	0.681737	0.00154953
MPZ	1.11199	0.00154969
C1QTNF4	1.05412	0.00155369
NTF4	1.71651	0.00157231
ZNF667	1.21671	0.00157868
SCN3B	1.57406	0.00158255
NGFR	1.2223	0.00158709
HGF	1.50347	0.00159651
MYH11	1.56024	0.00159738
IGJ	2.03774	0.00159758
ABCA8	1.26672	0.00160095
CHST3	1.06889	0.00163109
FBXO2	1.50901	0.00165085
PTCH2	1.04629	0.00165865
MRAS	1.00843	0.00165922
NPR1	1.08785	0.0016906
BEGAIN	1.14266	0.0017392
PYGB	0.850749	0.00174105
LYSMD4	0.981106	0.00174148
RBMS3	0.97451	0.00174762
MYOM1	1.261	0.00176338
PI3	2.18046	0.00176635
FXYD1	1.63813	0.00176788
SIK2	0.676661	0.00177543
GAREML	1.17719	0.0017841
MEG3	1.41284	0.00178582
RNF212	1.42569	0.00178957
XPC	0.705586	0.0017923
AVPR2	1.08264	0.00180021
OGFRL1	0.998036	0.00181569
RPS6	0.881931	0.00185927
LAMC1	0.87335	0.00186759
ARL4C	0.845008	0.0018848
TMEM176B	1.30468	0.0018888
TSPYL2	0.972385	0.00193511
HCG11	0.845502	0.00193845
RP11-252A24.7	1.00366	0.00195235
ADH1B	2.05224	0.00198865
PLIN1	2.2722	0.00198883
ITSN1	0.819824	0.0019944
RPS19	1.0983	0.00200272
PTPRS	0.901599	0.00200838
ALB	3.71949	0.00202177
SOX9-AS1	1.88631	0.00202439
RP11-1002K11.1	2.14669	0.00203246
IGF2	1.51327	0.0020431
FABP4	2.13112	0.0020712
TP63	1.28105	0.00208531
CHD9	0.718118	0.00208825
TUSC5	2.35589	0.00211277
ACTG2	1.52946	0.00211367
EVA1A	0.785159	0.00211479
RP11-166D19.1	1.27043	0.00211533
IL17RD	1.35968	0.00212463
ITM2C	1.01575	0.00214007
TTC23	0.78934	0.00216718
GPIHBP1	1.23664	0.00217799
RASD1	1.48534	0.00218416
RPL13P2	1.29294	0.00224102
FAHD2A	1.05209	0.00225549
LYVE1	1.61066	0.00226126
HSD17B2	2.44519	0.00228788
OAF	1.07333	0.00229183
RP11-489E7.4	1.44458	0.00229286
BACE1	0.701831	0.00229497
PTPRVP	1.28704	0.00231338
FNDC4	1.04466	0.00231912
FRZB	1.18826	0.00232464
TXNIP	1.04021	0.00234204
RSL1D1	1.00223	0.00235395
VSTM4	0.805126	0.00237298
GEMIN4	0.990533	0.00239236
DNAJB5	1.06863	0.00239823
SEMA6A	0.896155	0.0024034
LY75	1.38215	0.00240585
LCA5	1.42489	0.0024205
SCGB3A1	1.99209	0.00245274
CDC42EP2	0.678691	0.00245814
CBX7	0.716009	0.00246752
WLS	0.916065	0.00246773
RP3-473L9.4	1.52407	0.00247087
HIF3A	1.12007	0.0024809
HSPB6	1.84239	0.00249374
WNT2	2.17624	0.00249608
NACAD	1.03815	0.00250769
PPP1R15A	1.14412	0.00252446
FHL3	0.877841	0.00255118
MYO1H	1.62913	0.00258098
PPAP2B	1.08151	0.00259409
YBX3	0.83563	0.00261067
IGHA1	1.84316	0.00261904
DZIP1L	0.983719	0.00263256
MFAP3L	1.25975	0.0026727
NFYC	0.544473	0.00267901
IGLC3	1.91232	0.00271628
PRSS45	1.44924	0.00274097
EGR2	1.88329	0.00274636
MMRN1	1.62588	0.00275143
CD14	1.17653	0.00276575
RNF128	1.61151	0.00277966
APOA1	3.91235	0.00279426
MYOM2	1.47141	0.00279887
COL7A1	0.730787	0.00280995
FBXW7	0.724226	0.00281001
PDE4B	1.39641	0.00281913
PDE2A	1.12478	0.00283561
ECHDC3	0.955287	0.00284701
IGLV6-57	2.14553	0.00284711
NRIP2	1.25359	0.00286244
AMT	0.838872	0.00286551
DCN	1.17836	0.00287616
ARC	1.7777	0.00291081
RP11-467I17.1	1.55239	0.0029501
RPLP0	0.865482	0.00295495
UACA	1.03716	0.00296631
DAAM2	1.26735	0.00296849
TMEM176A	1.26566	0.0030138
RP11-92C4.6	1.27693	0.00301867
CYR61	1.19855	0.00302341
MIA	2.16122	0.00304899
EDN1	1.00987	0.00305368
ALDH3A1	1.36648	0.00307876
LINC00478	1.04191	0.00308861
ARHGAP28	1.80803	0.00309811
CRABP1	2.17642	0.00311215
CYP4F29P	1.86449	0.00312721
ARHGAP19	1.118	0.00315022
HLF	1.19697	0.00319291
AKR1E2	1.28316	0.00319664
KLHL7	0.734594	0.00321449
EDN3	1.68919	0.00321848
ART5	1.54503	0.00322096
PRSS12	1.72321	0.00322939
B3GALT5	1.45344	0.00326265
MFGE8	0.984066	0.00326882
TNNT2	1.79179	0.00328231
HS3ST6	1.9003	0.00329073
XDH	1.72791	0.00329362
RPL3P4	1.35749	0.00330067
CXCL2	2.26923	0.0033008
SNHG15	0.91027	0.00330111
APCDD1L-AS1	2.34823	0.003309
MT1X	1.99193	0.00335006
COL6A6	2.06486	0.00335436
APBB1	0.664322	0.00336594
LRRC4B	1.26786	0.00337347
CDIP1	1.11308	0.0033861
PROS1	1.19904	0.00344692
FAM101A	1.57649	0.00344942
PCYT1B	1.57955	0.00345
NTN5	1.15029	0.00348408
SDPR	1.39962	0.00350013
CELF5	1.45982	0.00352028
KDR	1.08762	0.00353639
HOXC-AS1	1.4684	0.00353677
DES	2.05932	0.00359394
CTD-3088G3.8	1.04969	0.00361196
KLK11	2.62478	0.00364585
AC131025.8	1.12846	0.00364599
SEMA3G	1.02395	0.00365922
SASH1	0.827472	0.00367611
KRT14	1.87425	0.00371839
SLC16A8	1.18038	0.00372233
ATP1B2	1.0621	0.00374603
PLEKHS1	1.10797	0.00375331
ZNF830	0.780035	0.00376688
ASPRV1	1.08923	0.00377581
CMA1	1.71488	0.00381022
FAM110D	0.946027	0.00382557
UCK2	0.847172	0.00384629
EFEMP2	0.693722	0.00385506
FAM57A	0.780144	0.00386667
SNED1	0.947934	0.00388747
RP3-406A7.7	0.876176	0.00388846
ADAM12	1.60226	0.00390483
CIDEC	2.32383	0.00392082
SCN4B	1.20312	0.00393516
DNAJC18	0.732673	0.00396309
SMYD1	1.84196	0.003968
FAM3D	1.88613	0.00399365
CSRNP3	1.4465	0.00400085
PGF	0.628507	0.00400205
EGF	1.98019	0.00400665
C7orf61	1.32999	0.00401222
AMOTL2	0.878111	0.00402371
FSCN1	1.14115	0.00402981
EGFLAM	1.14372	0.00403682
CD34	0.924352	0.0040962
EPB41L2	0.881573	0.0041062
TMCC1-AS1	1.17299	0.00411772
FAM20C	0.750158	0.00412809
CEBPB	0.866474	0.00412886
PLXDC1	0.908516	0.00414263
TXNRD3	0.87008	0.00415759
APP	0.809065	0.00418114
RP11-385F5.4	1.01809	0.00418529
SGCB	0.734517	0.00422391
TSGA10	1.16128	0.00423161
ANKFN1	1.89201	0.0042317
SLC43A3	0.866962	0.00428652
SESN3	1.08397	0.00428788
CLDN11	1.29547	0.00433261
GPRASP1	1.26229	0.00434536
CYB5R2	0.76591	0.00435326
PLD1	1.00493	0.0043708
ZNF133	1.05855	0.00437933
AC016735.2	1.76907	0.00439373
SPON1	1.01425	0.00441564
CTA-14H9.5	1.14347	0.00442196
SAMD5	1.51915	0.00445504
RPS23	0.739751	0.00452959
HADH	0.72336	0.00454031
NNAT	1.65301	0.00455577
NMB	1.22663	0.00455622
ARHGEF4	0.81738	0.00457124
SCARB1	0.70495	0.00459909
PGM5	1.02708	0.00461366
ABCA6	1.03422	0.00464966
KLF15	1.3863	0.00467204
MRC2	0.922763	0.00467785
CTTNBP2	1.22433	0.00471921
FCGRT	0.863807	0.00477382
AC074289.1	1.56618	0.00477819
CTD-2086L14.1	1.38088	0.00478338
RPL5	1.16401	0.00483532
FGF7	1.40376	0.00485694
SAA1	1.40717	0.00492279
ZHX3	0.786035	0.00493757
RNF112	1.20236	0.00494993
PIM1	1.26553	0.00500567
EPHB1	1.18594	0.00501106
ERG	0.826701	0.00503101
RAB40B	0.547455	0.00503801
ENOX1	1.04043	0.00507001
HSD11B2	1.18657	0.00512028
TMEM88	0.743933	0.00512399
LTF	1.6946	0.00513244
CLEC2L	1.76328	0.00513661
ZNF423	0.840843	0.00515657
JUNB	1.28878	0.00516917
COL17A1	1.62101	0.00535883
SCN2B	1.41946	0.0054031
SLC27A6	1.6947	0.00544304
TINAGL1	1.0627	0.00545671
PRNP	1.01546	0.00547845
SMO	1.06793	0.00549247
SOD3	1.19449	0.00549812
NFKBIA	0.753126	0.00568749
CTF1	1.21163	0.0057015
SYT8	1.3638	0.00573451
RP11-613M10.6	1.10335	0.00577873
ROBO4	0.821304	0.00578887
PDZRN3	0.862312	0.0058111
H3F3B	0.805767	0.00584651
SOX7	1.10926	0.00584798
CSF3	3.20909	0.00587928
MIR503HG	1.48928	0.00588122
MLH3	0.626144	0.00592682
N4BP2L1	0.804048	0.00593599
RIMS3	0.993882	0.0059801
SLC7A10	1.26567	0.00600194
TAC1	2.23556	0.00602961
KIRREL	0.876791	0.00603445
GPSM1	0.764753	0.00608609
C10orf10	1.2916	0.00610756
EIF3D	1.00351	0.00612054
NPHP3	0.672882	0.00616152
LZTS1	1.03952	0.00620215
ADIPOQ	2.25267	0.00622775
WASF3	0.98512	0.00623977
FLT4	0.86199	0.00627477
MOB3B	1.03661	0.00632212
CTSG	1.33981	0.00634054
TNNT3	1.00755	0.00634142
DLL1	1.2702	0.00634909
RBP4	2.33856	0.00635089
SNHG8	0.739986	0.0063609
CC2D2A	0.762955	0.00645229
RPL34	0.7499	0.00645263
MOCS1	1.07102	0.00651165
SYNM	1.61287	0.00655623
ADCK3	0.844379	0.00663076
WSCD1	1.13622	0.00664896
ST5	1.08104	0.00670235
MEIS2	1.06237	0.00672455
SCN4A	0.927665	0.00675199
IPO5	0.560167	0.00682055
ZFP36	1.38491	0.00687406
SPARCL1	0.997866	0.00690718
TYRO3	0.739804	0.00694028
KLK3	2.70008	0.00698585
ALDH1L1	1.61811	0.00701826
PHLDB1	0.776562	0.00703003
TAGLN	1.16136	0.00703298
MYBBP1A	0.74038	0.00707444
KIAA1614	0.734303	0.00707618
PEAR1	1.07375	0.00710142
AOC3	1.12314	0.00713622
NGFRAP1	0.646038	0.00716107
JAG2	0.650117	0.00716337
HOTAIRM1	1.15879	0.00722511
PRKAR1B	0.793972	0.00727433
RNU2-6P	2.19599	0.00734353
SAT2	0.696705	0.00735365
ADAMTS8	1.46017	0.00747956
TP53AIP1	1.28077	0.00749312
MAP1A	0.975232	0.00752738
AQP5	2.10279	0.0075301
DACT3	1.13677	0.00753456
AIF1L	1.10344	0.00759126
RPL35A	0.953561	0.00762168
LIFR	1.01553	0.00762969
SPRY1	0.775371	0.00763868
FBXO31	0.644705	0.00766009
ZNF554	0.767406	0.0077008
PDE5A	1.06979	0.00773269
ADM	1.27793	0.00777161
ZNF248	0.665517	0.00777816
NXN	0.878204	0.00784066
LSP1	0.696156	0.00786711
FAM212A	0.898765	0.0079074
PKD2	0.745503	0.00800651
IFFO2	1.03312	0.00804021
RBPMS	0.582311	0.00804736
NCOA1	0.54701	0.0081691
ARHGEF9	0.610272	0.00822876
OLFM2	1.11486	0.0082585
CNN2	1.06883	0.00826387
TMPRSS5	1.09838	0.00827174
MICU3	1.14579	0.00829773
AC147651.3	1.25548	0.00831438
MED28	0.462057	0.0083431
AFP	2.39372	0.00843731
AL928768.3	1.62516	0.00843944
CDCA7L	1.16638	0.0084473
LIAS	0.794204	0.00849913
SNAPC1	0.736694	0.00855417
RP11-244O19.1	1.16337	0.00855786
PDGFRB	0.751168	0.0085586
PLIN4	1.7739	0.00858325
GPX3	1.20568	0.00859609
SLC27A1	0.825404	0.0086263
DUS3L	0.659789	0.00866106
RP11-61I13.3	1.35039	0.0086779
FAM107A	1.33934	0.00873634
CEBPD	0.93398	0.00875537
TFPI	1.21993	0.00875604
ARHGAP6	1.01098	0.00875797
PLK3	0.882402	0.00883014
FNDC5	0.992976	0.00884896
USP53	0.685169	0.00887725
MYH3	0.833821	0.00888677
CPNE2	0.793259	0.00889813
GPD1	1.83489	0.00891514
DEFB124	2.02864	0.00894695
TANK	0.78379	0.00895107
GFRA2	0.910091	0.00896784
FBXO32	1.02018	0.00903886
PTGS2	1.93549	0.00904776
TGM1	0.727659	0.00910456
DRD2	1.64863	0.00911898
MAPKBP1	0.53918	0.009131
NLGN4X	1.16617	0.00921803
GPR3	0.923815	0.00927006
GATA6	1.04998	0.00930036
RPS7	1.5155	0.00935032
DHX38	0.65603	0.00936852
OFD1	0.71523	0.00939667
PTGER4	1.17286	0.0094597
SNAI2	1.2365	0.0094917
PDGFRL	1.1294	0.00949243
CYP2U1	1.11906	0.00949635
PLAC9	1.02509	0.00952283
GNE	1.02577	0.0095761
RP11-492E3.2	1.31087	0.00959975
PPL	0.855985	0.00962291
MST1	0.712577	0.00962843
ALDH1A3	1.06995	0.00963517
C12orf68	1.0923	0.00963991
RP11-339B21.13	1.00241	0.00967212
TGFB1I1	0.748487	0.00967212
RPS28	1.63465	0.0097162
ZBED3	0.704036	0.00976105
HAS3	1.25378	0.00981394
CCDC136	0.987905	0.00981505
RP11-923I11.6	1.28092	0.00982704
MAP2K3	0.874691	0.00988287
PURA	0.586188	0.00988626
TP73-AS1	0.639992	0.00992727
HOXA3	0.805358	0.00997827
TIMM44	0.546869	0.00999359
HNMT	0.754355	0.0100399
ANTXR2	0.873292	0.0100479
UBAP1L	0.654318	0.0101093
FAM126A	1.01396	0.0101268
TNFSF12	0.888483	0.0101346
RPL22	0.669331	0.0101662
GYLTL1B	0.80042	0.0101703
RPS4X	0.950327	0.0102315
SLC16A4	0.805152	0.0102752
LDB2	1.26994	0.010345
SRF	0.789673	0.01036
MTHFD1L	0.593159	0.0103904
RPL24	0.66302	0.0104427
MEG9	1.27285	0.0104734
ISLR	1.21907	0.0104737
ALKBH2	0.967552	0.0104927
KIF7	0.971388	0.0106143
L3MBTL4	1.29	0.0106252
LONRF1	0.90136	0.0106318
AC004453.8	1.18066	0.0107308
RPL4	1.21619	0.0107601
C3orf58	0.984336	0.0108524
USP11	0.647613	0.0109599
FBLN1	1.04443	0.0109764
TVP23C	0.946753	0.0110431
SNCG	1.14976	0.0110848
GPR162	0.898563	0.011094
CRTAP	0.651085	0.0110974
SSBP3	0.545404	0.0111317
JAM3	0.875506	0.0111535
IL34	0.872301	0.0112624
EBF1	1.06583	0.0112693
ASPA	1.17034	0.0112916
NFASC	0.78159	0.0113049
NMT2	0.733662	0.0113335
TMEM55A	1.1192	0.0113698
AC005356.1	1.62267	0.0114279
TBX18	1.11145	0.0115134
TERF2IP	0.643067	0.0115929
TAB1	0.553167	0.011688
RPS24	1.03062	0.0117345
CSRNP1	1.08866	0.0118907
AC096772.6	0.884228	0.0119327
FAM124A	0.999584	0.0119978
OBSCN	0.647807	0.0120095
MARK1	1.2759	0.0120321
AKR1C3	1.13287	0.0120328
PRRG3	1.50852	0.0120481
AGFG2	0.555606	0.0121314
MSI1	1.14958	0.0122404
GNB2L1	0.943179	0.0122873
CWF19L2	0.83845	0.0123212
CYYR1	1.00559	0.0123305
PRSS30P	1.41602	0.012337
GLI2	1.05627	0.0123641
ACVRL1	0.601731	0.0123925
GRID1	0.919416	0.0124148
AADAT	1.08108	0.0124732
LEPR	1.34054	0.0124734
KANK1	0.669399	0.0124959
WTIP	0.640678	0.012588
CHRNB2	1.31266	0.0126495
RP11-70P17.1	0.99582	0.012661
RPS5	0.939914	0.0126737
RP11-22B23.1	1.35565	0.0127213
C1S	0.76287	0.0127867
ARID5A	0.758613	0.0128493
GPR153	0.729924	0.0129017
JADE1	0.619756	0.0129448
SDK1	0.871551	0.0129665
VTN	1.90651	0.0130901
TP53	0.845895	0.0131422
CALB2	1.45894	0.0132168
SLC16A11	1.22026	0.0132942
DMBT1	2.41086	0.0134084
EGR3	1.27162	0.0134461
PFKM	0.714948	0.0134601
TMEM220	0.959013	0.0134608
TMEM18	0.595646	0.0135138
PXN	0.808488	0.0135632
PRICKLE2	0.848489	0.01359
RPL10	0.95754	0.0136002
WIPF3	0.854634	0.0136257
CLDN19	1.31282	0.0136672
TRO	1.20068	0.0137514
RPL30	0.658191	0.0137885
TIMP3	0.639411	0.0138289
SERPINF1	1.11383	0.0139034
KCNK3	1.47622	0.013987
RPS21	1.11612	0.0140203
ACACB	0.900527	0.0141479
ECSCR	0.861595	0.0141937
SLC5A1	1.39348	0.0142067
FMO3	1.04304	0.0142366
ZBTB4	0.5219	0.0142856
TBX15	1.11379	0.0143053
WDR19	0.770339	0.0143514
NPIPP1	1.05568	0.0143961
OVCH2	2.11205	0.0144064
TWIST1	0.938247	0.0144582
IFT172	0.735953	0.0144661
DDX51	0.572478	0.0144871
EFEMP1	1.02577	0.0146849
SCG5	1.58863	0.0147183
RPL27A	0.795199	0.014731
ESPNL	1.27153	0.0148109
GULP1	1.04573	0.0148177
SFT2D2	0.664586	0.0148506
TCF15	1.04137	0.0149047
TUBG2	0.865662	0.0149143
HTR2A	1.54564	0.0149757
LAMA3	1.06258	0.0149998
PRSS21	1.36398	0.0150403
RPL12	1.01679	0.0150802
CTB-178M22.2	1.07283	0.0151556
NR4A1	1.38421	0.0151611
SMAD3	0.538934	0.0152105
NAV2	0.649936	0.01531
EBPL	0.687319	0.0155017
HYAL1	0.945484	0.0155971
ANKS1A	0.632491	0.0156874
WDFY2	0.685336	0.0157001
GPR173	0.821248	0.0157539
TMCC2	0.872164	0.0158349
TBC1D4	0.930021	0.0158349
JPH2	0.837385	0.0158796
ADORA1	1.19255	0.0159592
2018-09-10	0.688831	0.0159982
ALDH1A1	1.18107	0.0160681
C19orf80	1.32586	0.0161082
SOCS3	1.40851	0.016115
NR4A3	1.69067	0.0161258
DUSP2	1.33043	0.0161749
AC005152.3	1.66624	0.016251
KCNC4	0.655217	0.0163809
KAT2A	0.546218	0.0164636
BATF3	0.951514	0.0164812
TEF	0.828483	0.0164863
NCALD	0.955395	0.0165877
YBX1	1.27532	0.0166657
SGCE	0.830738	0.016674
CYP46A1	0.759477	0.0166808
TMEM221	0.878947	0.0166971
STMN3	0.665558	0.016748
PID1	1.15427	0.0167933
BLCAP	0.55135	0.0167955
HEY2	1.04403	0.0167993
IGKC	1.44681	0.0168286
RPS11	0.751237	0.0168817
DSG3	1.44528	0.0169451
UTRN	0.607311	0.0170134
CXorf36	0.77723	0.0170256
RSPH9	0.704314	0.017059
SNHG5	0.735578	0.0170714
RP11-627G23.1	1.56744	0.0171269
GRK4	0.504478	0.0171448
IMPDH2	1.00131	0.0171618
LYNX1	0.849855	0.0173247
DZANK1	0.955197	0.0173836
LPL	1.60179	0.0174146
ETV1	0.844336	0.0174877
BICC1	1.06533	0.0175841
UGGT2	0.468078	0.0176923
AMOTL1	0.730325	0.0177704
SPATA18	0.969281	0.0178847
RP11-126L15.4	1.18115	0.0179093
ASXL1	0.681215	0.0179104
KIF25	1.25127	0.0179327
FNDC3A	0.694983	0.0179352
RPLP1	0.889334	0.0179896
SEMA4G	1.13333	0.0180408
LHB	1.09883	0.0180539
ZC3H6	0.772937	0.0181366
PHYHIP	0.902419	0.0181933
PARD3B	0.674573	0.0182284
GAREM	0.962588	0.0182306
LAMC2	0.993381	0.0183187
DST	0.82271	0.0183215
EIF3L	0.521049	0.0183541
RPL14	0.842717	0.018405
IGLC2	1.6285	0.0184858
CD200	0.78262	0.0185127
KLHL21	0.927816	0.0185954
CLDN15	0.506209	0.0186793
TP73	0.560921	0.0186822
CSNK2A2	0.618203	0.0188018
GNB3	0.900537	0.0188378
RP11-234N17.1	1.05933	0.0188662
GLIS1	1.04305	0.0188904
C1orf116	1.03229	0.0188995
NAT8L	0.98784	0.0189489
GFPT2	1.07271	0.0189822
PLEKHB1	1.20659	0.0189876
COG3	0.557515	0.0189885
LINC01111	1.5867	0.0190498
SLC25A30	0.817759	0.0191961
LAMA4	0.767993	0.0191973
MAML3	0.90389	0.0192294
PROX1	1.23062	0.0192386
RP11-817O13.6	0.603286	0.0193206
DPT	1.15715	0.0193348
PAX8-AS1	1.39202	0.0194131
LAMA1	1.04391	0.019481
CACHD1	1.18897	0.0195637
ACTA2	1.13969	0.0196167
DTNB	0.743236	0.0196753
RIC3	1.00841	0.0197559
SLC41A3	0.816186	0.0198427
RPS9	0.714538	0.0199041
EXT2	0.642599	0.0199115
GPBAR1	1.13703	0.0199195
COMMD6	0.563233	0.0200566
ITGB8	0.926	0.0200922
RPL9	0.944996	0.0201272
ZBTB16	1.46855	0.0204146
JUND	0.918098	0.0204722
RUSC2	0.701276	0.0204779
BHLHE41	0.898792	0.0205535
DERL3	1.04002	0.020619
ZYX	0.487243	0.020702
FKBP7	0.854984	0.0208856
SFSWAP	0.439585	0.0209553
SLC29A4	0.961195	0.0209696
RADIL	0.830495	0.021029
TENC1	0.606595	0.0210387
SEZ6	1.43541	0.0210744
ADAMTS16	1.44162	0.0211051
RPS14	0.780301	0.02112
PER2	0.887289	0.0211274
FAU	0.965304	0.0211381
CXCL16	0.956748	0.0211678
ZNF331	0.637442	0.0212362
TFAP2C	1.02208	0.0213788
RPL6	1.21436	0.0214806
MATN2	1.21957	0.0216471
C16orf86	0.73095	0.0216519
SVEP1	0.840232	0.0216564
NKX2-5	1.70339	0.0217257
RPS8	0.986472	0.0217548
VPS9D1-AS1	0.980522	0.0219821
ATF3	1.3054	0.0219904
KCNAB3	0.72924	0.02202
NEFH	0.980328	0.0220571
PLP1	1.31628	0.0220775
PLEKHG4B	0.795865	0.0220831
EIF3F	0.542811	0.0222083
LTK	1.10925	0.0223668
SH3PXD2A	0.637224	0.02239
RN7SK	1.50801	0.0224564
TRIM9	1.09504	0.0225076
ETV4	0.963058	0.0226509
PDLIM3	0.787319	0.0227871
OLFML1	0.778782	0.0229351
CITED4	1.08323	0.022942
HSD17B14	0.750053	0.0229807
RBMS2	0.583239	0.0229833
VWCE	0.860873	0.0230123
PKIA	1.11831	0.0230169
CPT1C	0.590186	0.0230282
TEKT3	1.07794	0.0231436
DTX1	0.790476	0.0231608
RASIP1	0.514205	0.0231785
CTD-2562J17.7	0.819619	0.0232005
KLF10	0.865975	0.0232098
RAB11B-AS1	0.860456	0.0232325
ZNF333	0.816177	0.0232772
RPL39	1.10456	0.0232863
AXIN2	0.886576	0.023395
FHIT	0.951433	0.0234783
CDADC1	0.91843	0.0234844
EZH1	0.549695	0.0234995
ALDH1A2	1.20359	0.0235825
PRPH	1.27703	0.023592
STARD8	0.543493	0.0238621
MSRB3	0.546929	0.0240657
ZDHHC14	0.549779	0.0240914
RPS3	0.839603	0.0241177
EEF2	0.621855	0.0241432
LRIG3	0.838057	0.0241485
ERRFI1	0.966777	0.0241515
PLEKHF1	0.886295	0.0241694
RP11-5C23.1	0.832634	0.0242471
ING4	0.480274	0.024251
ITGA10	0.929005	0.0244021
ZNF343	0.570173	0.0245156
PLD2	0.571176	0.0246173
GLT8D2	0.967699	0.0247486
RPLP2	0.842298	0.0249032
LINC01071	1.03608	0.0249756
C3orf18	0.702103	0.0250532
ID4	0.933806	0.0253051
KLF9	0.853926	0.0253126
B3GNT1	0.57485	0.0253234
CCL2	1.55528	0.0253673
IGFBP4	0.799663	0.0253722
ADAM11	0.730394	0.0254396
GNAL	0.887215	0.0255275
HIC2	0.577031	0.025564
RUNX1T1	1.02447	0.0257154
TRPV4	0.729056	0.0257286
PARD3-AS1	1.01922	0.0257999
RPL11	0.873986	0.0258034
RSPO3	1.34175	0.0258509
VPS51	0.643599	0.0258855
MAGI2	0.655783	0.0258901
LPP	0.445698	0.0258984
RP11-395I6.3	1.29582	0.0260564
ROR1	0.913255	0.0261498
TULP3	0.586388	0.0261919
ZNF438	0.618932	0.0262364
MXI1	1.1307	0.0262957
MPRIP	0.409519	0.0265212
DEFB1	1.3547	0.0266164
ZFAS1	0.557046	0.02664
RPL36	0.742751	0.0266429
METTL7A	0.578388	0.0268362
DDB2	0.670432	0.0268601
RP11-211G3.2	1.34917	0.0268649
BRSK1	0.646299	0.0268862
NAP1L5	0.746145	0.0269081
KRT16	1.20121	0.0270296
FDCSP	2.00207	0.027045
PPM1F	0.554166	0.0271012
IP6K2	0.618525	0.0271443
FAS	0.884007	0.0272004
FRG1B	1.01891	0.0272144
MYH7B	0.655068	0.0273693
ZNF204P	1.07238	0.0274041
SNTB2	0.577838	0.0275081
CACNA1A	0.48518	0.0276301
RPL18	0.647824	0.0276877
RASAL1	1.23168	0.0277663
IFT57	0.666261	0.0277704
GDPD5	0.56814	0.0278661
LIPE	1.28391	0.0279011
RAD18	0.655394	0.0279298
KLF2	0.863155	0.0279361
IGDCC4	1.05655	0.02798
NACA	0.473914	0.0279946
AL592183.1	1.02343	0.0280776
FAM46B	1.01577	0.0281379
VPS36	0.533003	0.0282728
DDIT3	0.88759	0.0283894
FBXL12	0.666599	0.028393
ARGLU1	0.85793	0.028418
POMC	0.734444	0.0285835
RP6-99M1.2	1.51849	0.0286738
GDF11	0.682429	0.0287094
PTHLH	1.7039	0.0287178
ITGA1	0.5301	0.0288991
2018-09-04	0.701447	0.028951
AC096579.7	1.42325	0.0291011
CDR1	1.83954	0.0292084
KDELC2	0.710826	0.0292501
RP11-49I11.1	1.04402	0.0292589
GPHN	0.67219	0.029397
TMEM43	0.569013	0.0294683
BOLA3-AS1	0.904496	0.0295326
WBSCR17	1.07231	0.0295737
TNNC1	1.12287	0.0296145
DNAJB1	1.10061	0.0296383
MAGI2-AS3	0.807939	0.0296575
MTURN	0.623283	0.029694
ARHGEF28	0.840106	0.0297176
PLEKHA4	0.573099	0.029753
B3GAT1	1.07723	0.0297872
DYRK4	0.704075	0.0298165
RP3-402G11.25	0.802291	0.0298917
PAN2	0.680856	0.0300396
RP5-1180C10.2	0.687083	0.0300857
FOPNL	0.447652	0.030113
RPL15	0.669825	0.0301199
TLE2	0.567253	0.0301653
MVB12B	0.619111	0.0301938
RUNX2	0.782219	0.0302199
GPRASP2	0.847742	0.0303794
RPS2	0.957179	0.0304433
hsa-mir-8072	0.810366	0.0304759
EIF1	0.523695	0.0305097
TNFAIP2	0.735852	0.0305217
SRGAP2	0.607964	0.0306123
FRMD6	0.711149	0.0306664
ZNF511	0.493548	0.0307356
TGFBR2	0.720114	0.0307988
SMG6	0.400876	0.0309839
IGFBP6	1.07537	0.0310567
CDC42EP4	0.682726	0.031096
PTPN9	0.430352	0.0312115
GNG4	0.837032	0.0312116
BICD1	0.994591	0.0312981
TNS1	0.98743	0.0313213
DYNC2H1	0.95286	0.0313321
PCDHB4	1.00009	0.0313366
BEX2	0.854824	0.0313684
RP11-159H22.1	1.02058	0.0314011
RBMXL1	0.676667	0.0314283
CAV2	0.827099	0.031437
RP3-399J4.2	0.605925	0.0314711
CH25H	1.46319	0.0315592
PCNX	0.662799	0.0317257
ARHGEF10	0.676062	0.0317417
PSD	0.696403	0.0320718
DIO2	1.73967	0.0320803
PFDN5	0.597243	0.0320835
ADAT2	0.539762	0.0321626
EHF	0.998682	0.0321935
RP11-1094M14.11	0.845243	0.0321955
ADRB2	1.05057	0.0322161
EHBP1	0.685752	0.0323706
GBGT1	0.625701	0.0324274
RP11-121M22.1	1.1499	0.0325227
TBC1D2B	0.643856	0.0325735
RNF157	0.809129	0.0326669
CDO1	1.12432	0.0327515
LINC00341	0.981234	0.0328467
NR2F1	0.879348	0.0329752
RCN1	0.750898	0.0330367
SLC25A42	0.566443	0.0330748
SMAD9	0.840582	0.0331457
NDRG1	0.698134	0.0332309
IGHM	1.17975	0.0332465
TTC4	0.807684	0.033332
PPIL4	0.596314	0.0333436
ZNF34	0.515329	0.0335278
CNTNAP1	0.70274	0.0336273
NGF	0.994672	0.0336566
CLIC2	0.930706	0.0337916
DLC1	0.847761	0.0338376
GOLGA7B	0.875317	0.0338378
PYROXD2	0.844387	0.0339373
ABHD14B	0.550597	0.0339391
ADRA2B	1.18994	0.0339832
RPL10A	0.989334	0.0341599
SLC38A3	0.878623	0.0343259
RBFOX2	0.532206	0.0343418
COX4I1	0.722706	0.0343966
GTF2F1	0.54966	0.0344722
RPS4XP6	0.857796	0.0346199
GPAM	1.20396	0.0348386
RP11-134G8.8	0.638787	0.0348874
CFL2	0.753482	0.0348964
ZSCAN31	0.685221	0.0349792
GRASP	0.605359	0.0349909
GHR	0.889325	0.0350765
TSC22D4	0.622433	0.0351295
LPCAT2	0.758005	0.0352302
RP11-156P1.3	0.786204	0.0353833
RNU2-59P	1.60018	0.0353879
TERF2	0.386498	0.0355384
SCARNA18	0.991935	0.0356138
ZCCHC24	0.714939	0.0356301
SPATA6	0.51064	0.0356454
FOSB	1.41048	0.0356944
LEP	1.71586	0.0357198
ITGA2B	0.823197	0.0357336
FGFR2	0.694721	0.0361006
ABL1	0.573074	0.0361772
PPFIBP1	0.51604	0.0363993
EXOSC2	0.551344	0.0364443
AKAP1	0.689093	0.0364538
TSC22D1	0.653157	0.0364651
RSU1	0.514509	0.0364799
RPS3P6	0.92934	0.036493
PQBP1	0.552513	0.0365926
EFNB2	0.792992	0.036624
MEI1	1.02354	0.0366373
FAM131A	0.555285	0.0368455
KCNK5	0.784008	0.0368764
ITGA7	0.831626	0.0369452
SH3KBP1	0.590605	0.0369551
RPS7P1	0.906446	0.0371091
ADCY5	0.647693	0.0371349
AMPD2	0.61244	0.0371492
TNFRSF10B	0.474885	0.0371524
RBM23	0.722378	0.0371983
SERPINF2	0.785623	0.0372548
WNT5B	0.728969	0.0372777
PALMD	0.735518	0.037286
CA11	0.672619	0.03732
ESYT2	0.588649	0.0373418
ARL13B	0.77368	0.0373519
ZNF853	0.753189	0.037374
PI16	1.01113	0.0374635
RP11-33O4.1	0.938984	0.0374889
DCBLD2	0.614715	0.037501
MYL9	1.03449	0.0375199
SOD2	0.91628	0.0375596
HOXD9	0.57644	0.037721
CIDEA	1.62746	0.0377729
RPL35	0.592939	0.037865
METTL16	0.383887	0.0380024
SACS	1.03858	0.0380189
RGS2	1.14245	0.0380773
RP11-137H2.6	0.793361	0.0381134
ZNF711	1.0607	0.0381163
C19orf57	0.7652	0.0387304
CRY2	0.628023	0.0387956
CTSF	0.702926	0.0388408
SLCO4A1	0.990469	0.0390654
TSPAN11	0.783865	0.0391702
CTDNEP1	0.469669	0.0392522
OTUD3	0.614651	0.0392602
ARHGEF25	0.61068	0.0392839
MT2A	0.879092	0.0394535
CEP164	0.393293	0.0395481
NOP2	0.569458	0.0395912
H19	0.934753	0.0396104
PEBP4	1.03766	0.0396193
SCARNA10	1.23332	0.03978
TNFRSF1A	0.399694	0.0398432
FHOD3	0.849549	0.0400448
RP11-49C24.1	0.728341	0.0400834
ASB1	0.444375	0.0401039
RPL26	0.556064	0.0401627
RP13-1016M1.2	0.774949	0.0401759
MYL6B	0.566576	0.0406826
NPM3	0.761447	0.0408165
TPD52L1	0.642613	0.0408851
ADIRF-AS1	0.685926	0.0409574
TNRC6B	0.544678	0.0410255
PPP1R12A	0.586505	0.0410359
AURKC	0.716365	0.0410488
FAM193B	0.482251	0.0410516
TRIP10	0.632399	0.0412208
DDX19A	0.413561	0.0412757
EHD3	0.637293	0.0413108
RPS18	1.34672	0.0413731
DOCK1	0.506475	0.0419569
TSPAN18	0.703401	0.0419927
ENPP2	1.18599	0.0420169
TSPYL4	0.471994	0.0420973
NBEAL1	0.633154	0.0421003
FGFR1OP2	0.64717	0.0421309
BDH2	0.730233	0.0422565
ABCA5	0.827753	0.0423823
RPL37	0.944135	0.0423866
MRGPRF	0.78069	0.0424046
BMPR1A	0.509199	0.0424129
DIMT1	0.555597	0.0425563
PVRL1	0.677728	0.0426138
TRPC1	0.949388	0.0426551
PTCH1	0.750763	0.0426765
RPL37A	1.02074	0.042726
KIAA0020	0.54807	0.0428144
EEF1DP5	2.50994	0.0428149
MAGI1	0.492283	0.0430283
KIAA1456	0.892429	0.0430603
RAB6B	0.750365	0.0430619
SLC25A20	0.594012	0.0430833
USE1	0.664313	0.043172
EIF3E	0.605683	0.0433061
CTD-2540B15.9	0.646056	0.0433134
ID1	0.774259	0.0433408
TRIO	0.431591	0.0433886
AXL	0.516862	0.0434161
ZC2HC1A	0.741668	0.0434571
HERPUD2	0.523059	0.0434957
PAPSS1	0.513749	0.0435055
RP9P	0.633757	0.0436007
RP11-333I13.1	0.912493	0.0436249
ASIP	0.778738	0.0437026
PROSC	0.495225	0.0437366
HEPH	0.732271	0.0438181
RASSF8	0.831762	0.0438426
PIGZ	0.660027	0.0438496
KIAA0355	0.613901	0.0440273
MAP1B	0.703413	0.0440593
CD27-AS1	0.4544	0.0444764
CTA-29F11.1	0.881402	0.0445497
NAB1	0.722895	0.0445583
TMCO6	0.757645	0.0445789
RND3	0.675532	0.0445991
TOP1MT	0.679314	0.0448378
ANKRD29	0.630325	0.0448449
PRKD1	0.969563	0.0450832
C12orf43	0.501104	0.0453269
VGLL3	0.757709	0.0454333
RP5-977B1.11	0.976941	0.0455062
CCNL1	0.691714	0.045553
C17orf107	0.619763	0.0455623
NINL	0.583074	0.045749
RP11-54C4.1	0.530823	0.0458405
AFAP1L2	0.760097	0.0459446
HLA-DRB5	2.78876	0.0459554
KLK6	1.16308	0.0459619
C9orf85	0.46357	0.046102
NPAS2	0.601104	0.0461294
HSPA12B	0.692341	0.0462083
TMEM237	0.69998	0.0463036
C19orf12	0.472728	0.0464054
CD320	0.442658	0.0465854
SMARCA1	0.626189	0.0466673
STRA6	0.846461	0.0467592
TFCP2L1	0.95171	0.0468156
ZCCHC11	0.497809	0.0470867
CDKN1A	1.04619	0.0471046
FNDC3B	0.546458	0.047134
SLC39A14	0.76473	0.0472426
MTHFSD	0.486606	0.0472429
SLC22A17	0.614407	0.0472431
TCF4	0.616614	0.0473111
RP5-1085F17.3	0.501975	0.0473522
SLC39A8	0.827097	0.0474234
NPY2R	1.79964	0.0475679
PNPLA7	0.679811	0.0476116
RPS18P12	0.49465	0.0476294
MSRA	0.409029	0.0476821
DDX26B	1.02125	0.0478561
BST1	0.558828	0.0479048
CA2	1.84044	0.0480379
SAMD4A	0.675845	0.048125
TMEM98	0.59461	0.0481521
RPS25	1.2577	0.0481934
RNU2-61P	1.63935	0.0483621
MFAP5	0.956963	0.048392
CCDC82	0.827001	0.0484967
ZNF503	0.743898	0.0485963
SLIT2	0.782733	0.0486073
CTGF	0.959765	0.0486929
CDKAL1	0.462882	0.0488054
KCTD12	0.687526	0.0489686
IL6	1.55865	0.0489983
DIO3OS	0.768224	0.0490304
GJC2	0.770076	0.049143
FAT4	1.03971	0.0491721
BMS1	0.591544	0.0492406
SLCO3A1	0.481674	0.04926
PRMT2	0.414889	0.0495326
VIPR1	0.588288	0.0496068
LRRC16B	0.662893	0.0496109
TMX4	0.587827	0.0498031
ATN1	0.633693	0.0498703
PRDX6	0.498501	0.0499283
RGL1	0.714121	0.0499629

## Sheet: STAR_DESeq2_up_Normal_vs_IDC
Gene ID	log2FC (NvI)	p-value
NDRG2	2.50779	2.8215e-24
CD300LG	3.35713	3.62553e-23
ALX4	3.2709	6.78185e-23
FIGF	4.66716	1.57873e-20
LAMC3	2.84008	3.25629e-20
OXTR	3.57059	4.3633e-20
KIT	2.99499	1.03457e-19
CHRM1	4.4379	1.95502e-19
BTNL9	2.2879	6.46008e-19
CA4	3.99304	9.97568e-19
FAM3D	4.63207	1.09711e-18
MME	2.49176	1.61537e-18
RP11-161M6.2	2.61325	7.8842e-18
NRG2	2.99464	1.07845e-17
CCL28	3.21337	1.23748e-17
ADAMTS5	2.46463	1.36366e-17
AC131025.8	2.63363	1.76378e-17
SLC13A2	3.84973	4.45016e-17
PIGR	4.78771	4.81796e-17
SAMD5	3.51163	4.93739e-17
SOX8	2.86237	8.19783e-17
ELF5	3.6868	1.02606e-16
TNNI2	2.524	1.2076e-16
ETV3L	4.92555	1.5311e-16
AC016995.3	4.85686	1.8196e-16
ABCA10	2.84976	1.95815e-16
SFRP1	3.08764	2.36633e-16
TRIM29	2.48055	2.87086e-16
NES	1.62888	3.09727e-16
RASGEF1C	3.70546	4.30398e-16
PRX	1.49694	5.48907e-16
TTYH1	3.58543	1.16513e-15
NFIB	1.8152	1.17022e-15
SPRY2	2.27336	1.73965e-15
TMEM213	5.3386	1.95734e-15
RP11-292F22.7	4.61417	3.10691e-15
GPC3	2.3224	3.47898e-15
SMYD1	4.85956	5.39178e-15
KCNMB1	2.39193	1.10331e-14
C1orf95	2.57822	1.30563e-14
CX3CL1	2.42618	1.58367e-14
PPP1R14A	2.00594	2.23411e-14
MIR143HG	2.40028	2.38143e-14
SOX10	3.2813	2.4508e-14
SYT8	2.90843	2.53382e-14
S100B	2.51351	2.55052e-14
FBLN5	1.51862	2.96653e-14
CRYAB	2.28043	3.11177e-14
SAA1	2.82676	5.39041e-14
PAK3	2.6542	5.71271e-14
CAPN11	2.5134	6.11559e-14
GABRP	3.18709	9.17001e-14
RP11-211G23.2	4.25188	1.00231e-13
FMO2	2.11719	1.44054e-13
COL6A6	4.21328	1.60103e-13
FAM189A2	2.27011	1.98191e-13
CNTFR	2.7229	2.04847e-13
ITIH5	1.93353	2.87886e-13
FAM3B	4.21313	4.14306e-13
ABCA9	2.42162	4.53677e-13
CDH4	2.79585	5.47565e-13
EDN3	3.35558	6.79615e-13
IL17B	2.88523	7.57967e-13
CELF5	2.90026	7.89266e-13
RP11-93B14.5	4.63677	1.0484e-12
FAM150B	4.44188	1.08293e-12
ROPN1B	4.45663	1.12521e-12
C2orf40	2.97993	1.17424e-12
TMEM178A	2.31007	1.40883e-12
DENND2A	1.71179	1.98578e-12
DMD	2.02918	2.04266e-12
TNNC2	1.64003	2.04593e-12
SCARA5	2.72778	2.45002e-12
CFD	2.42166	2.62025e-12
CACNA1G	2.1876	3.78828e-12
SEMA5A	1.84695	4.60926e-12
JPH2	1.99988	5.44746e-12
APCDD1L	3.33588	5.72495e-12
ADAM33	1.94173	5.79214e-12
SLC7A3	3.38323	6.05858e-12
ADCYAP1R1	2.23217	6.34442e-12
NTF4	2.78615	8.71677e-12
ACTG2	2.54162	9.65115e-12
SLC26A5	3.07199	1.05017e-11
MEIS2	2.15948	1.17665e-11
MAGI1	1.39765	1.29151e-11
CAPN6	2.82702	1.33788e-11
KLF5	2.20918	1.54205e-11
C2orf82	3.11595	1.54581e-11
TP53AIP1	2.58486	1.57224e-11
PAMR1	1.92277	1.58595e-11
PLEKHH2	2.06645	1.6778e-11
LOXL4	2.63201	1.8505e-11
FZD7	1.748	2.1684e-11
CMTM5	3.0562	2.18447e-11
DCX	3.69333	2.57914e-11
PENK	5.34112	2.89922e-11
RELN	3.17613	3.31342e-11
TCF7L2	1.59423	3.44988e-11
APBA1	1.72882	3.97081e-11
MUC4	3.47957	4.41929e-11
RP11-923I11.7	2.82473	4.54769e-11
TESC	2.11832	4.87716e-11
C10orf90	3.84157	5.59401e-11
TP63	2.15497	5.62908e-11
IRX1	2.49853	5.78971e-11
CNN1	2.08329	6.14893e-11
PTPRZ1	2.81838	6.74848e-11
PDE1C	2.65681	7.29611e-11
DST	1.82645	8.50569e-11
FAT2	2.44455	9.51745e-11
LINC00086	2.17256	9.72705e-11
NPM2	2.31349	1.03509e-10
ANO1	1.44292	1.11045e-10
LA16c-366D3.1	2.67627	1.12042e-10
ECEL1	3.61332	1.18916e-10
DLK1	4.22956	1.27128e-10
EDNRB	2.23039	1.33122e-10
APCDD1	1.96314	1.34539e-10
OLFML2A	1.62523	1.37535e-10
LINC00640	2.81881	1.40938e-10
KCNN4	2.19514	1.47023e-10
FOLR1	3.57379	1.49189e-10
AL035610.1	3.0227	1.62042e-10
SOSTDC1	3.52069	1.71607e-10
TCEAL5	3.30756	2.19588e-10
SRPX	2.00457	2.41604e-10
EIF3L	1.12173	2.44894e-10
TNNI1	3.94875	3.33461e-10
CXCL2	3.71052	3.35142e-10
PDZD4	1.4755	3.73382e-10
TSHZ2	1.73602	3.75077e-10
TPT1-AS1	1.32412	3.75956e-10
RSPO1	2.65892	3.78597e-10
OSR1	1.84935	4.04255e-10
GPRC5B	1.73811	4.18612e-10
CPE	2.43308	4.46132e-10
FREM1	2.67734	5.2928e-10
GPR144	4.61432	5.29369e-10
DPP6	1.73131	6.76906e-10
SCN4A	1.69939	8.57597e-10
RP11-189B4.6	4.83675	8.85948e-10
PRDM8	1.744	1.04526e-09
AIF1L	2.0165	1.13192e-09
DLK2	2.42796	1.14019e-09
NSG1	2.07316	1.14966e-09
RP11-154D6.1	2.25832	1.15427e-09
SAV1	1.29525	1.24819e-09
WDR86	1.69062	1.27112e-09
PDGFA	1.5037	1.32974e-09
PI3	3.2268	1.45057e-09
OLFM4	4.37874	1.47003e-09
APCDD1L-AS1	3.94251	1.47095e-09
HS3ST6	3.15984	1.67551e-09
SLC16A11	2.32965	1.89718e-09
CD36	2.23741	1.96264e-09
ROPN1	3.68542	2.12492e-09
PKP1	2.42645	2.31747e-09
TRIM2	1.41124	2.45916e-09
LGR6	2.11029	2.58686e-09
KRT15	3.12335	2.77628e-09
HPSE2	4.92731	2.83144e-09
RP11-736N17.4	4.52504	2.83338e-09
ZNF667	1.8491	2.87568e-09
TMEM132C	2.02251	2.87665e-09
CD164L2	1.99143	2.88239e-09
CXCL6	3.80997	2.96897e-09
OBSCN	1.3102	2.98783e-09
MYOM2	2.28899	3.02591e-09
RGAG4	1.19956	3.02642e-09
WNT6	1.92319	3.32341e-09
SEMA3G	1.61561	3.54512e-09
ITM2A	2.19223	3.55216e-09
GLTSCR2	1.35156	3.55249e-09
RPS6	1.34764	3.79377e-09
GPM6B	1.98805	3.80001e-09
AQP5	3.46214	3.8047e-09
ABCA6	1.72221	3.81536e-09
LYVE1	2.35548	4.13746e-09
GPIHBP1	1.85202	4.19777e-09
ENPP6	2.65521	4.57718e-09
NECAB1	2.11375	4.61649e-09
SLC25A27	2.43842	4.91263e-09
MIR145	1.8314	5.56698e-09
LIFR	1.71925	5.67408e-09
FGF17	2.17237	5.81297e-09
CHGA	4.07367	5.95539e-09
LINC00842	3.14636	6.00667e-09
RP11-469H8.6	3.57586	7.17195e-09
PPL	1.52664	7.84938e-09
CTD-2587H19.2	3.67004	8.11139e-09
ZNF204P	2.28056	8.72827e-09
RNF150	1.41077	8.90477e-09
LEP	3.63726	9.14725e-09
PDGFD	1.71425	9.54206e-09
LEPREL1	1.27839	1.03684e-08
MYH11	2.11203	1.05939e-08
RGMA	1.77172	1.10711e-08
COL23A1	1.5769	1.16953e-08
ADH1B	2.66581	1.23528e-08
GSTM2	1.83384	1.27677e-08
HCG11	1.2861	1.3451e-08
CLDN11	2.00846	1.48024e-08
CPAMD8	2.02637	1.5057e-08
F10	1.67481	1.77945e-08
PLK5	2.40408	1.86805e-08
IL11RA	1.3979	1.95434e-08
RYR1	1.5718	2.0495e-08
ID4	1.88155	2.05287e-08
SAA2	2.5295	2.22045e-08
RP1-193H18.2	2.0767	2.39352e-08
PLIN4	2.78778	2.5092e-08
PNMAL2	1.20828	2.62894e-08
C2orf88	2.24699	2.64957e-08
FAXDC2	1.34261	2.71566e-08
TEPP	2.06533	2.86826e-08
GRAMD3	1.40618	2.95046e-08
MYLK	1.52165	3.27614e-08
ALDH7A1	1.15754	3.61182e-08
GRIA4	2.89731	3.73109e-08
RBP7	1.94543	4.01373e-08
MYO1H	2.28943	4.15143e-08
LPL	2.86181	4.49452e-08
RP11-470P21.2	3.51013	4.57083e-08
CLDN8	2.31294	4.918e-08
ANGPTL4	1.64134	5.2123e-08
CRABP1	2.91149	5.29448e-08
HAS3	2.15861	5.34553e-08
RPL34	1.21326	5.49712e-08
SCGB3A1	2.52711	5.69333e-08
TENM2	2.30235	5.75925e-08
NEURL3	2.35515	5.99659e-08
MATN4	2.35279	6.0975e-08
PRSS50	1.73182	6.21708e-08
MAML2	1.50338	6.31186e-08
TNNT2	2.4813	6.34605e-08
TMPRSS2	1.93203	6.61327e-08
SERPINB5	1.99207	6.93204e-08
CDKN1C	1.51096	7.01463e-08
MIR4454	3.61904	7.22985e-08
L3MBTL4	2.22664	7.23915e-08
KLHL13	2.52917	7.27981e-08
PPAP2B	1.49572	7.74569e-08
RP11-536O18.2	2.23349	7.85475e-08
PCDH18	1.73408	8.01693e-08
CASC8	3.59499	8.017e-08
METTL7A	1.16542	8.10347e-08
PTPN14	1.14729	8.14094e-08
SPRY1	1.2695	8.35657e-08
KANK1	1.16985	8.53432e-08
CLDN19	2.27335	8.99667e-08
NPR1	1.45987	9.08661e-08
ALDH3A1	1.90309	9.16334e-08
PTCHD1	2.47514	1.02378e-07
SORBS1	1.62583	1.02405e-07
RHOJ	1.2996	1.05442e-07
HIF3A	1.55572	1.05629e-07
CRIM1	1.28971	1.06371e-07
SLCO1A2	4.45987	1.12979e-07
TFAP2C	1.86019	1.14289e-07
PSD2	2.177	1.16081e-07
AC074289.1	2.30115	1.21444e-07
NAT8L	1.76776	1.24983e-07
EFCAB1	2.35275	1.3089e-07
RP11-7I15.4	3.08094	1.3781e-07
EGFR	1.60452	1.40805e-07
DUSP9	3.03176	1.46805e-07
AC093822.1	6.68994	1.50475e-07
KRT17	2.40547	1.53753e-07
PM20D2	1.64791	1.54957e-07
FGFBP1	5.40132	1.55645e-07
RP11-981G7.2	4.16774	1.5763e-07
FABP4	2.62281	1.61375e-07
RASL10A	2.03402	1.64974e-07
ADAMTS9-AS2	2.05642	1.65075e-07
ANTXRL	4.10508	1.69938e-07
AC006946.16	2.76371	1.71703e-07
TPD52L1	1.36484	1.74786e-07
AC097724.3	2.27365	1.82842e-07
MAB21L1	1.98283	1.89755e-07
SOX9-AS1	2.46693	1.9811e-07
IL17RD	1.76978	2.09944e-07
RP11-180I4.2	3.27018	2.11112e-07
TBC1D4	1.62825	2.12745e-07
COBL	1.5284	2.16094e-07
APOD	2.11673	2.17291e-07
NTRK1	1.71792	2.25776e-07
ADCY5	1.3479	2.32987e-07
CLDND2	1.49443	2.35768e-07
LIPE	2.27416	2.35832e-07
PLA2R1	1.32115	2.39878e-07
RP11-554A11.7	2.31259	2.48554e-07
CXCL12	1.47539	2.50261e-07
KCNC4	1.18225	2.71718e-07
CYP24A1	4.48593	2.87423e-07
ANKRD20A11P	3.59248	2.9486e-07
MAMDC2	1.7468	3.00902e-07
MYEOV	2.86804	3.13727e-07
EPB41L4A-AS1	1.16698	3.15479e-07
EGFLAM	1.60504	3.18384e-07
LCN2	2.57935	3.45894e-07
GSTM5	2.65916	3.45949e-07
ALS2CL	1.07263	3.4694e-07
LRRN4CL	1.41297	3.64576e-07
WDR59	0.927216	3.83748e-07
CXCL5	4.46606	4.00587e-07
RNF128	2.1516	4.04145e-07
VWCE	1.53026	4.2231e-07
RP11-299J3.8	1.27588	4.67574e-07
MAOA	2.83932	4.74334e-07
B3GALT1	3.05058	4.76755e-07
SLC22A3	2.28421	4.85851e-07
BEND5	1.26762	5.4964e-07
FZD10-AS1	1.33284	5.58669e-07
BARX2	1.89734	5.64264e-07
CSRP1	1.21418	5.69164e-07
HRCT1	1.79323	5.72528e-07
RGS9	1.69662	5.75271e-07
SLC17A7	2.16774	5.88961e-07
ARHGAP26	1.38881	5.93559e-07
KRT5	2.03488	5.96007e-07
ZNF92P3	4.1367	6.05563e-07
NTRK2	1.9981	6.07233e-07
PLEKHG4	1.244	6.16191e-07
RASSF6	1.78228	6.48203e-07
GNE	1.56275	6.68841e-07
SLC27A6	2.72895	6.79866e-07
EPHB1	1.61681	7.05239e-07
PRCD	1.17634	7.0913e-07
ADIRF-AS1	1.33569	7.10614e-07
HS3ST4	3.27188	7.18928e-07
EFNB3	2.08558	7.19646e-07
LAMA1	1.82268	7.2935e-07
IGJ	2.25046	7.4266e-07
LAMB3	1.64093	7.59848e-07
CHRDL1	1.69724	7.62985e-07
SLC26A4	2.32499	7.81648e-07
YPEL4	1.27117	7.88347e-07
LRRC38	3.3572	7.94595e-07
TMEM130	1.71314	8.03836e-07
SEMA6A	1.14802	8.03884e-07
C1QTNF4	1.34182	8.30084e-07
PLIN1	2.60179	8.32643e-07
TUSC5	2.69704	8.42486e-07
RP11-481H12.1	1.90613	8.76579e-07
PDE9A	1.53219	8.87793e-07
KCNE1	2.22301	8.89226e-07
TPPP2	3.06762	8.99358e-07
MFGE8	1.30894	9.27736e-07
TIMP4	1.71773	9.32255e-07
CTD-2270F17.1	3.62241	9.52546e-07
FAM13A	1.18233	9.54948e-07
WIF1	3.14273	9.55106e-07
KCNIP2	2.05803	9.95763e-07
TCEAL7	1.77311	1.00181e-06
FAM184A	2.29476	1.04668e-06
ALDH1A1	1.84441	1.06798e-06
CDKN2C	1.13183	1.07973e-06
DIS3	0.926472	1.08587e-06
AMN	2.1815	1.09984e-06
B3GAT1	1.93492	1.10842e-06
C5orf27	3.21813	1.21537e-06
ALDOC	2.46613	1.23893e-06
ECHDC2	0.917168	1.24453e-06
MLXIPL	1.96016	1.25714e-06
SEMA6D	1.92097	1.27145e-06
ATOH8	1.66854	1.28311e-06
IRS2	1.02322	1.2949e-06
CACNA1G-AS1	2.46771	1.31163e-06
AMIGO2	1.45253	1.31432e-06
TCF7L1	1.14895	1.337e-06
APLN	1.90443	1.36579e-06
KLHL29	1.33488	1.43597e-06
C19orf80	2.17984	1.44219e-06
ITGA6	1.40946	1.44809e-06
INTU	0.882222	1.50604e-06
KIF26A	1.07394	1.53511e-06
RP11-830F9.5	2.70675	1.5377e-06
GPD1	2.49381	1.54267e-06
AC104438.1	1.62003	1.54393e-06
COLGALT2	1.6244	1.57565e-06
RPL9	1.61095	1.59781e-06
CTD-3094K11.1	2.55612	1.73905e-06
TMEM71	1.9434	1.75906e-06
TGFBR3	1.37705	1.76147e-06
ENOSF1	1.17927	1.79325e-06
FXYD1	1.86363	1.80673e-06
SVEP1	1.39551	1.85768e-06
PRSS12	2.05688	1.90787e-06
NOVA1	1.43456	1.91677e-06
HAND2-AS1	1.519	1.92209e-06
B3GALT5	1.82851	1.92425e-06
ST13	0.992929	1.96279e-06
NOB1	0.867524	2.01113e-06
PI16	1.81532	2.04766e-06
G0S2	2.38633	2.06472e-06
PLAGL1	1.40095	2.15977e-06
PRSS45	1.58866	2.17179e-06
BCL11A	1.66813	2.18513e-06
CTB-107G13.1	2.9035	2.20376e-06
IGFBP1	4.68381	2.21206e-06
SLC2A4	1.87035	2.24171e-06
SMARCA2	1.21585	2.30579e-06
KRT14	2.18071	2.30981e-06
SNHG8	1.02708	2.32674e-06
AC005152.3	2.54194	2.3318e-06
VSIG2	1.65042	2.33239e-06
BARX1	1.75485	2.36546e-06
TERC	1.85856	2.37051e-06
CSTA	1.98714	2.37913e-06
RNF186	3.81653	2.38065e-06
GAREM	1.55832	2.45675e-06
MYL7	3.07081	2.47374e-06
CPA1	2.50701	2.61009e-06
KLF15	1.75791	2.61341e-06
CSRNP3	1.90283	2.65493e-06
NAV2	1.05116	2.6595e-06
NEUROG2	5.60641	2.68177e-06
NRTN	1.46593	2.85058e-06
PIK3C2G	2.27501	2.9076e-06
SH3BGRL2	1.35656	2.93318e-06
JADE1	0.960118	3.02469e-06
PHLDA1	1.28849	3.20828e-06
DENND2C	1.63439	3.2485e-06
RP11-66B24.7	2.03981	3.25647e-06
PLXNA4	1.46859	3.30036e-06
EXTL1	1.69861	3.31755e-06
VLDLR	1.67636	3.34586e-06
OGFRL1	1.16535	3.35622e-06
KCNH3	1.4177	3.38874e-06
RP11-666A8.7	2.23223	3.40459e-06
RP11-513G19.1	1.45591	3.44316e-06
HBG2	2.25379	3.45027e-06
RP11-583M2.2	1.56408	3.4724e-06
SLPI	2.15897	3.53618e-06
ANKRD53	1.24554	3.56283e-06
CHST9	3.67493	3.60736e-06
RASIP1	0.8691	3.62347e-06
LINC00162	2.07401	3.63837e-06
ADM	1.7127	3.6453e-06
ADORA1	1.80073	3.67436e-06
PRSS3	2.9787	3.76836e-06
ASIC1	1.4053	3.8237e-06
STOX2	1.69808	3.98187e-06
ALDH1L1	2.05235	4.06939e-06
AC078883.4	2.16451	4.10003e-06
CMTM7	1.12794	4.14745e-06
RP11-332H18.4	0.979204	4.53527e-06
COL17A1	1.98913	4.62646e-06
IL1RL2	1.42391	4.67379e-06
PADI2	1.72552	4.68258e-06
GPR97	2.05054	4.69751e-06
RCAN1	1.28564	4.7391e-06
MIR497HG	1.67831	4.75824e-06
INSRR	1.50969	4.91236e-06
GAL3ST1	2.27394	4.92436e-06
KCNMB2	4.06787	5.07008e-06
SYNM	1.99732	5.07521e-06
PRNP	1.30989	5.13671e-06
AC005682.5	2.60617	5.23126e-06
DUSP6	1.48888	5.23847e-06
PYGB	1.02115	5.32789e-06
CXCL3	3.30761	5.41831e-06
ZCCHC11	0.963222	5.47333e-06
ALOX15B	2.76475	5.51739e-06
SPHKAP	3.69522	5.54729e-06
GGT7	1.55664	5.61397e-06
ALPL	1.44676	5.74859e-06
VWDE	3.48334	5.77046e-06
UGT8	2.65329	5.90537e-06
LAMA3	1.57191	6.1376e-06
RP11-571L19.8	2.10116	6.44736e-06
ANXA3	1.5736	6.50025e-06
ASPA	1.58922	6.54879e-06
SLC35F3	1.93598	6.69713e-06
CDC42EP5	1.19181	6.71637e-06
ETV4	1.5338	6.83715e-06
NR2F1	1.48638	6.93203e-06
GSN	0.841808	6.9379e-06
KCNIP1	1.76118	7.48073e-06
KCNQ4	1.62211	7.66626e-06
GPX3	1.58324	7.68645e-06
PLLP	1.77475	7.77051e-06
XDH	1.96216	7.92653e-06
TAC1	2.76536	7.9498e-06
RP11-554I8.2	3.0754	7.97789e-06
RAB40B	0.716504	7.98107e-06
SPINK5	2.83626	8.17518e-06
WNK2	1.27584	8.17741e-06
IGSF10	2.42897	8.31149e-06
RP11-490M8.1	1.87587	8.40108e-06
RP11-402J6.1	2.88714	8.583e-06
WDFY3-AS2	1.03015	8.65517e-06
SLC38A3	1.48758	8.79687e-06
SYN2	2.42898	8.88231e-06
HOXA3	1.12119	8.90488e-06
MYRF	1.35211	9.261e-06
CIDEA	2.63949	9.31366e-06
GRHL1	1.57696	9.34622e-06
FGFR2	1.19204	9.41597e-06
RPL32	1.02432	1.00035e-05
FRMPD1	1.65587	1.0137e-05
ABCA5	1.46755	1.02475e-05
AC147651.1	2.9207	1.06619e-05
NTN5	1.35391	1.06909e-05
AMOTL2	1.08009	1.07236e-05
FGF23	2.36153	1.1214e-05
AC006116.20	1.6625	1.12255e-05
NRIP2	1.40735	1.13727e-05
RP11-113I24.1	2.80563	1.1591e-05
GFAP	2.5853	1.16551e-05
TSGA10	1.43096	1.1728e-05
RP11-627G23.1	2.30029	1.19108e-05
ZNF814	0.968958	1.22356e-05
ZNF711	1.81681	1.22542e-05
TCP11L2	1.33183	1.22853e-05
RPL3P4	1.56644	1.25322e-05
LIMS2	0.94032	1.26146e-05
THRB	1.2504	1.26275e-05
SYNPO2	1.27882	1.28205e-05
ANKRD35	1.19096	1.29422e-05
MYH7B	1.07316	1.2956e-05
ALDH1A3	1.44038	1.38301e-05
PNPLA7	1.24997	1.38737e-05
RP11-182J1.14	3.19599	1.39376e-05
VIPR1	1.1008	1.42982e-05
ACSS2	1.06813	1.4771e-05
AKAP12	1.41697	1.49235e-05
EBF1	1.43862	1.4969e-05
NMT2	1.03221	1.51639e-05
AMT	1.00177	1.52516e-05
ZNF677	1.14867	1.57377e-05
ATL2	0.862767	1.60086e-05
NBEAL1	1.15278	1.60967e-05
PDLIM4	1.05315	1.61234e-05
GOLGA8A	1.93665	1.62889e-05
PRR4	1.2245	1.65994e-05
IGF1	1.62731	1.66077e-05
RNF157	1.35717	1.68448e-05
ITPRIPL1	1.90344	1.70775e-05
CHL1-AS2	1.89947	1.71574e-05
AP000662.4	2.52775	1.75184e-05
AQP7	1.87324	1.7546e-05
HSPB6	1.88173	1.75481e-05
RP6-99M1.2	2.35005	1.76953e-05
FTCD	1.35456	1.77113e-05
PROX1	1.78884	1.81163e-05
CIDEC	2.56007	1.82365e-05
GPAM	1.90706	1.83618e-05
RAX2	3.56818	1.85658e-05
SMARCD3	0.881784	1.8587e-05
SAA4	2.26442	1.97269e-05
TMEM88	0.949271	2.07697e-05
RP11-613M10.6	1.32221	2.09147e-05
CHI3L2	1.56186	2.10827e-05
STAB2	2.2204	2.15821e-05
TRAF3IP2	0.813837	2.16294e-05
RP11-981G7.6	2.81278	2.17252e-05
KDR	1.28654	2.17452e-05
ADAMTS8	1.74011	2.18023e-05
BOC	1.30544	2.22221e-05
MEST	1.3847	2.38493e-05
LINC00338	1.50955	2.41228e-05
CTD-2350C19.1	1.02718	2.41279e-05
TF	2.07507	2.42498e-05
AC004562.1	2.84957	2.4335e-05
PDGFRA	1.15128	2.43674e-05
LDHB	1.372	2.44744e-05
MLLT4-AS1	1.92617	2.47269e-05
KRTDAP	1.46123	2.51906e-05
ITIH2	3.94159	2.52135e-05
SDPR	1.52952	2.52887e-05
RSPO4	1.69935	2.56553e-05
CITED1	2.33961	2.57751e-05
AC016735.2	1.9595	2.59004e-05
NKPD1	1.31348	2.59937e-05
HOXA4	1.80333	2.66897e-05
AGXT	3.04576	2.69166e-05
MOB3B	1.25995	2.74749e-05
CGNL1	1.27059	2.75305e-05
ADARB2	3.04073	2.77013e-05
ARHGAP20	2.2415	2.79031e-05
ADAT2	0.879279	2.81576e-05
PRIMA1	1.72591	2.8345e-05
RNA5-8S5	2.09335	2.91007e-05
DPYS	2.46026	2.93318e-05
LYSMD4	1.02027	2.9938e-05
KLB	2.45226	3.01279e-05
SLC26A3	2.67497	3.03374e-05
AQPEP	2.26443	3.12078e-05
ALOX12P2	2.15954	3.1285e-05
ZC3H8	0.731566	3.15622e-05
SCARNA6	2.30691	3.1571e-05
AC124789.1	1.31505	3.16992e-05
SNX32	1.39016	3.18938e-05
ICAM5	1.45056	3.24635e-05
FIGN	1.85184	3.27779e-05
RP11-107F6.3	2.16607	3.28725e-05
PID1	1.51008	3.37789e-05
GNG7	0.885126	3.37999e-05
MIA	2.31856	3.4035e-05
CYB5R2	0.930539	3.42746e-05
THRSP	2.07789	3.44597e-05
PKP2	1.27742	3.47899e-05
TRNP1	1.48707	3.54577e-05
NCALD	1.34135	3.60079e-05
ARHGEF37	0.924222	3.68495e-05
PWAR6	1.4001	3.74283e-05
AVPR2	1.13132	3.77037e-05
CYP26A1	2.72615	3.78323e-05
ADAM11	1.13615	3.85981e-05
SLC28A1	2.66769	3.89115e-05
HBA1	2.25694	3.99774e-05
PROM1	1.79347	4.01147e-05
LZTS3	1.27713	4.04945e-05
PELI1	1.12842	4.05834e-05
AC147651.3	1.51309	4.07326e-05
AC007040.11	2.09885	4.11611e-05
GPRASP1	1.39545	4.19324e-05
SATB1	0.965499	4.21156e-05
RHOU	1.47152	4.24357e-05
ADIPOQ	2.49459	4.2548e-05
SLIT3	0.971395	4.28435e-05
RHOXF1	1.68962	4.31661e-05
KIAA1456	1.47444	4.45004e-05
TMEM253	1.22243	4.4599e-05
SNHG14	1.01154	4.4733e-05
RBMX	0.988141	4.4743e-05
IQCJ-SCHIP1	2.70305	4.55126e-05
ROBO3	1.08864	4.55862e-05
SLC3A1	1.40381	4.56333e-05
RP5-1039K5.16	2.51989	4.59134e-05
CNNM1	1.88568	4.61225e-05
SCN2B	1.56377	4.65247e-05
RPS27A	1.0589	4.67351e-05
C16orf89	1.52705	4.68198e-05
H3F3B	0.969971	4.69657e-05
PYROXD2	1.29909	4.80091e-05
EIF3F	0.762662	4.88153e-05
EPHA2	1.04483	4.91152e-05
RP11-61A14.3	0.950002	4.9411e-05
TINAGL1	1.23495	4.99272e-05
KIAA1683	1.21244	5.01316e-05
ALAS2	1.52583	5.06881e-05
TFPI2	2.97434	5.11162e-05
ATP6V0A4	2.892	5.14484e-05
VPS51	0.987248	5.18854e-05
ARID5B	0.841093	5.19611e-05
TAGLN	1.34667	5.26741e-05
OFD1	0.945074	5.33325e-05
TMCO4	0.716043	5.36902e-05
SLC4A11	1.41374	5.43501e-05
YBX3	0.903367	5.44408e-05
DUX4L8	3.97179	5.52547e-05
SLC16A8	1.30948	5.52768e-05
SLC25A30	1.15729	5.53469e-05
FRRS1L	3.01823	5.58297e-05
HAPLN3	1.34913	5.65159e-05
PLCH2	1.02696	5.68186e-05
RBP4	2.59309	5.71015e-05
AF131215.9	1.0725	5.71895e-05
TFCP2L1	1.53639	5.76068e-05
TANK	0.964415	5.79773e-05
PCCA	0.780488	5.81748e-05
IGHA2	2.25857	5.86082e-05
ARID5A	1.00599	5.90106e-05
ACVR1C	2.57932	6.10239e-05
ACCS	0.958321	6.12577e-05
ATP13A5	2.40222	6.15376e-05
KLK6	1.86965	6.19669e-05
RPUSD4	1.00031	6.22152e-05
HBA2	2.2138	6.23209e-05
PCK1	3.02438	6.28441e-05
SLC26A4-AS1	3.06297	6.33065e-05
CSN1S1	6.13414	6.3434e-05
FABP7	2.40061	6.4359e-05
ACACB	1.18283	6.45879e-05
LRFN5	1.8494	6.47388e-05
S100A1	1.62107	6.48987e-05
GAN	1.02645	6.55812e-05
SOWAHC	1.21238	6.60931e-05
RSPO3	1.89916	6.61947e-05
GRIK5	1.25378	6.62367e-05
TMEM220	1.20979	6.6723e-05
PTPRH	1.32135	6.67864e-05
PEG3	1.41921	6.6889e-05
MMRN1	1.59241	6.72209e-05
SLC6A11	2.02274	6.72313e-05
RPL13P2	1.34433	6.75892e-05
YIPF4	0.909909	6.7658e-05
EGR2	1.79833	6.91568e-05
PTCH1	1.20944	7.02106e-05
EFCAB4B	1.22032	7.10734e-05
INMT	1.1424	7.10993e-05
GSTA1	3.83182	7.11829e-05
SASH1	0.901862	7.15749e-05
GPR124	1.47374	7.19122e-05
AL117190.3	2.16369	7.27433e-05
NACAD	1.01525	7.57245e-05
LINC00961	2.27495	7.6199e-05
SLC19A3	2.28362	7.67332e-05
RASAL1	1.75012	7.7054e-05
SCN2A	2.16638	7.84576e-05
RPS12	0.851274	7.91959e-05
ASTN1	1.69272	7.95733e-05
KLK10	1.61475	8.03015e-05
CECR7	1.42951	8.08645e-05
TMIE	1.49955	8.19243e-05
RP11-88H9.2	1.30277	8.19429e-05
RPL22	0.847381	8.22998e-05
FAM20A	1.19652	8.26616e-05
GRIA2	2.5629	8.36661e-05
SLC6A14	2.17432	8.41525e-05
FAHD2A	1.0492	8.54183e-05
APOA1	3.0975	8.59773e-05
SOX15	1.21736	8.64351e-05
PLP1	1.81463	8.91684e-05
SRSF11	0.79237	8.922e-05
BEND7	0.950234	8.99375e-05
AASS	1.37263	9.04086e-05
ARHGEF28	1.27015	9.08155e-05
NPY2R	3.48955	9.13248e-05
ENPP2	1.76819	9.14324e-05
MYC	1.12466	9.15073e-05
NNAT	1.69094	9.33146e-05
RP11-696N14.1	1.94321	9.41777e-05
AC010980.2	1.99903	9.59747e-05
RP11-489E7.4	1.36474	9.65349e-05
GALNT16	1.14804	9.74307e-05
MYH3	0.931271	9.8733e-05
AP001046.5	1.46917	9.90363e-05
ZNF334	1.65143	9.95038e-05
KCNK7	1.83837	9.962e-05
TTLL10	1.15712	0.000100289
ARGLU1	1.21432	0.000101954
AC027307.3	1.63561	0.000101956
RP3-412A9.16	1.40378	0.00010264
RNF165	1.39985	0.000102818
RP11-156E8.1	2.6862	0.000103104
RP11-817J15.2	2.20586	0.000104064
MYOM1	1.1739	0.000104887
CCNB1IP1	1.16502	0.000105223
RND3	1.0672	0.000105643
EMCN	1.04697	0.000105782
IL34	1.08249	0.000105853
SLIT2	1.25763	0.00010658
PTGDS	1.24067	0.000107019
SLC34A2	1.65426	0.00010747
STX16	0.595638	0.000107826
CYP39A1	2.44121	0.000108424
SIK2	0.64273	0.000110087
RP5-1142A6.2	1.52656	0.000111033
NEURL2	0.930108	0.000111779
GPRIN2	1.34482	0.000112008
SLC7A10	1.34772	0.000114139
HOXD9	0.8899	0.000114681
ZNF37BP	1.10368	0.000115221
ENPEP	1.68622	0.000119961
RP11-126L15.4	1.52629	0.000120698
GULP1	1.26662	0.000120898
TRIM36	1.83849	0.000123431
FMN2	2.52881	0.000123569
TMCC1-AS1	1.20705	0.000124652
MRAS	0.935012	0.00012533
CCR10	1.00187	0.000127234
PPP1R1A	1.54991	0.000129611
CSN3	5.41757	0.000129927
RPS20	0.735115	0.000130299
CTD-3088G3.8	1.07493	0.000130984
LALBA	5.40454	0.000131307
GSDMB	1.43979	0.000132152
CNTN1	1.32022	0.000132757
TMEM192	0.507478	0.000134158
NACA	0.6714	0.000135504
GOLGA8B	1.27682	0.000138356
FOXI1	1.94408	0.000140139
PEAR1	1.18142	0.00014249
CCDC8	0.990261	0.000143632
ZNF133	1.09059	0.000144459
CLIP4	1.34909	0.000144661
BAZ2B	1.0043	0.000146305
RP11-403I13.5	2.72892	0.000146991
EGR1	1.51603	0.000147197
ARHGEF25	0.927718	0.000147868
ASPG	1.72742	0.000148046
DACT2	2.09294	0.000149333
AC026904.1	1.74403	0.000149759
CLCN1	1.47056	0.000150152
ADH1C	1.95582	0.000152124
HADH	0.770188	0.000152473
MAPKBP1	0.64589	0.00015355
RBM25	1.05008	0.000154268
IGF2BP2	1.76842	0.000154693
RP11-274B21.10	1.50892	0.000155185
ITGB8	1.18395	0.000156225
ZNF750	1.47125	0.000156348
FBXO9	0.910742	0.000157518
RNPC3	1.31097	0.000158284
C3orf58	1.10803	0.000158454
RN7SL170P	2.88723	0.000159594
DCLK1	1.37573	0.000159693
AKR1B15	4.37028	0.000160495
ZNF33B	0.875919	0.000161925
TMEM18	0.72471	0.000163023
WDR17	2.2689	0.000163506
DGAT2	1.47044	0.000165431
STXBP1	0.715434	0.000166368
AC005300.5	1.25692	0.000168369
MEG3	1.287	0.000169064
FOLH1	2.17892	0.000170467
SLMAP	0.977806	0.000170825
CYP4F29P	1.74495	0.000175428
XPC	0.680146	0.000176453
RIC3	1.29731	0.000177797
TERT	6.31258	0.000178366
PPARG	1.39354	0.000181585
DCP1A	0.594101	0.000184606
CYP11A1	1.10781	0.000184892
GPX2	1.81202	0.000187308
ETV5	1.15298	0.000187472
RP11-398K22.12	1.16356	0.000188123
SOD3	1.25202	0.00018836
COLCA1	1.31804	0.000189264
EPHB6	1.01841	0.000192714
IRX2	1.04134	0.000193047
TLE1	1.068	0.000194716
RP11-121M22.1	1.58203	0.000195516
RPL26	0.8174	0.000195967
AMBP	2.04796	0.000196668
ABCA8	1.1347	0.000196781
RP11-155O18.6	1.63506	0.000197388
STAC2	1.89933	0.000199491
PLSCR4	0.929396	0.000202148
BMPER	2.17874	0.000203093
SEC14L5	1.98944	0.000204865
ETFDH	0.909783	0.000208114
FOXC1	1.32577	0.000210976
TPM2	0.735532	0.000211585
OR7E22P	2.85341	0.00021256
ABHD5	0.840742	0.000213093
EFNB2	1.16638	0.000214584
RP11-379F4.9	1.35018	0.000214597
RP11-554A11.6	1.67454	0.000220133
KBTBD6	1.17601	0.000220706
TCF15	1.1873	0.000221561
CYP46A1	0.965982	0.000222386
OSGIN1	1.25329	0.000222572
GNRH2	1.7535	0.000224212
KBTBD12	3.45649	0.000225389
SELV	3.05198	0.000225844
RARB	1.66786	0.000225965
FAM171A1	1.35131	0.000227517
TNNT3	1.07978	0.000228448
AOC3	1.19353	0.000229406
MAN2C1	0.708879	0.000229928
GFRA2	1.02969	0.000231577
TDRD10	1.72131	0.000232633
VGLL1	2.95201	0.000234386
TAS1R1	1.34531	0.000234398
RP11-146N23.1	1.82219	0.000238211
NT5DC3	1.00407	0.000238229
LINC01071	1.35389	0.000239884
POLR1E	0.98523	0.00024062
AC004466.1	1.3931	0.000241864
ZNF471	1.32985	0.000243756
ST8SIA1	1.09119	0.000244378
ZNF502	0.975544	0.00024545
FAM211A-AS1	0.947932	0.000245654
DEFB124	2.04068	0.000249703
WLS	0.914588	0.000251919
MAPK4	2.60218	0.000252725
PPP1R12B	0.854239	0.000254712
RGN	1.86393	0.000257505
LINC00839	1.79528	0.000260391
AC093415.2	1.21495	0.000262121
IFFO2	1.12593	0.000262393
NAB1	1.06037	0.00026526
MICAL3	0.969757	0.000266886
LRP6	0.898336	0.000267119
LEPR	1.49032	0.000268231
FAM46A	0.977316	0.000268585
RP11-114H23.3	1.34546	0.00026867
CTA-14H9.5	1.18214	0.000268944
POLG2	1.00763	0.000269076
NLGN1	2.07505	0.000270721
RP11-61I13.3	1.44903	0.000270802
ACVRL1	0.738667	0.000275484
DNM1P35	1.32596	0.00027598
GCNT2	1.32936	0.000288351
PIK3R1	0.722723	0.000290939
HSPA4L	1.38717	0.00029276
C11orf1	0.94246	0.00029314
TGFA	1.66753	0.00029349
BRINP1	1.85329	0.000296236
AC137932.5	1.73565	0.000300662
FBXO24	1.18457	0.000304892
SDK2	1.17435	0.000304965
CA3	2.16259	0.000307387
ANTXR2	0.988405	0.000307587
EVA1C	0.956902	0.000310373
ATP1B2	1.01059	0.000312598
ATP13A4	2.2033	0.000313621
PGAP1	1.08647	0.000313741
PYGM	1.07082	0.000314464
IGF2-AS	1.24608	0.000316592
ZC3H13	1.14619	0.000319047
RP5-1159O4.2	1.70749	0.000329469
PHYHIP	1.10782	0.000331353
PNISR	0.952597	0.000335371
RP4-635E18.8	1.41317	0.000343491
MIR205HG	1.18565	0.000347501
LPIN1	1.03187	0.000347554
YY1	0.591548	0.000349115
NDUFA3P4	1.5262	0.000363821
SHC4	2.01978	0.000364157
CACHD1	1.41188	0.000367165
LINC00092	2.24249	0.000370384
CTC-239J10.1	1.63761	0.000370747
ARHGAP36	3.72287	0.000370803
MPPED2	1.37642	0.000371656
PAK7	2.09056	0.000371683
NTF3	1.66569	0.000379653
WASF3	1.01742	0.000380195
ANKS1A	0.818928	0.00038679
NIPAL1	1.29142	0.000387628
DNAJC18	0.673872	0.000390152
CA11	0.958178	0.000390529
RBM5	0.825502	0.000396012
GPRASP2	1.11803	0.0003964
PRKAR1B	0.873273	0.000399168
C4orf19	1.62462	0.000402301
PPARA	0.794726	0.000407555
RP11-706O15.1	1.09965	0.000407953
C1orf115	0.762924	0.00041153
CHKA	0.833568	0.000412016
MFAP3L	1.17181	0.0004142
KLK5	2.02624	0.000416168
RP11-166D19.1	1.13391	0.000417756
FGF14-AS2	1.14793	0.000424162
SH3YL1	0.852229	0.000424835
KIAA1671	0.99219	0.000426934
DES	1.83122	0.000430886
LDB2	1.352	0.000432748
FAM126A	1.12193	0.000437844
RUNX1T1	1.28487	0.000440079
ZNF883	1.54127	0.000440473
NFIA	0.751186	0.000440726
LRRC4B	1.13722	0.000444715
RP11-349A22.5	0.843635	0.000446277
IL20RA	1.3876	0.000446574
SLC28A3	2.04456	0.000446715
NFAT5	0.87706	0.000448964
MFSD4	1.37688	0.000450214
GALT	0.83292	0.000452042
C1orf145	1.23109	0.000456183
SEC31B	0.993446	0.00045797
ZSCAN31	0.984553	0.000459579
TRHDE-AS1	3.38501	0.000467296
NMNAT2	1.44728	0.00046743
EFEMP1	1.14975	0.000468683
TNFRSF21	1.01115	0.000471829
MAF	0.745255	0.00047384
PCNX	0.91354	0.000473877
RP5-1042I8.7	1.41647	0.000474236
HLF	1.04377	0.000476624
EMILIN2	0.996389	0.000477271
CORO2B	1.07107	0.000478447
TXNIP	0.93848	0.000483115
ANKRD29	0.889548	0.000489417
SHANK2	0.939695	0.000492938
LGALS12	1.92617	0.000494157
FGF2	1.18899	0.000498029
MLLT4	0.770755	0.000498427
RP3-399J4.2	0.813476	0.000499979
ARHGEF4	0.803571	0.000504871
MAP2K6	1.08502	0.000505584
USP44	1.73465	0.000510432
RPS9	0.893709	0.000512168
SORBS2	0.838284	0.000514196
AFP	2.55366	0.000519096
ARHGAP21	1.14009	0.000521963
AL132709.5	1.7926	0.000526629
LGR4	0.956319	0.000527516
RP5-977B1.11	1.37631	0.000528305
GGTA1P	0.977144	0.000529037
RP11-295P9.3	0.877689	0.000530432
RP11-21L23.2	0.968138	0.000531532
SRSF8	0.590536	0.000533097
CCNL1	0.971153	0.000534287
USP53	0.728995	0.000534303
KLK7	1.79465	0.000536922
PARK2	1.43525	0.000537308
RP1-146I3.1	0.969041	0.000539427
DHODH	0.800662	0.000540631
CAV2	1.06884	0.000544414
TULP1	1.59917	0.000544536
FGF1	1.08337	0.000547622
CCDC152	1.03303	0.00054868
AC105020.1	0.882029	0.000551461
CTD-2540B15.9	0.929888	0.00055529
ARAP3	0.613758	0.000559455
NYAP1	1.68275	0.000560153
ALDH6A1	0.636682	0.000561764
SLC39A8	1.19268	0.000562165
NPHP3	0.689222	0.000565024
RNA5SP202	2.59104	0.000565032
CDC14B	1.0628	0.000571289
PLCB1	1.17676	0.000574953
DENND5B	0.885476	0.000576721
RTL1	2.38764	0.000577261
RP11-429A20.4	2.73479	0.000581736
PITPNM3	1.55418	0.000582337
NAALAD2	1.56595	0.000586809
SCN3A	1.54354	0.00058765
PLEKHA4	0.768806	0.000588148
CTD-2245F17.2	1.66569	0.00058849
PRRG3	1.57762	0.000589209
FNBP4	0.769934	0.000594674
MGST1	1.20718	0.000596275
ADAMTS1	1.10358	0.000605015
LCT	3.22612	0.000605556
ARHGAP28	1.61291	0.00060581
AGTR1	0.410348	0.00061316
CTD-2363C16.1	1.81293	0.000615033
RN7SL452P	1.40484	0.000616063
NID1	1.02821	0.00061661
RP1-17K7.2	1.5911	0.000622508
GRIA3	2.36649	0.000622698
LRAT	1.45211	0.000623364
NGFR	1.03699	0.000624798
CTC-510F12.2	1.5139	0.000626367
DEFB1	1.60561	0.000632346
DAPK2	0.726403	0.000632556
PARD3-AS1	1.19752	0.000634512
DDX6	1.18111	0.000640928
DIO3OS	1.08414	0.000642422
C20orf203	1.43892	0.000655876
RP11-92A5.2	3.68553	0.000656152
RP11-31F15.2	1.42945	0.00065732
SHMT1	0.550337	0.000664099
SPG20	1.01228	0.000667156
MPPED1	1.44894	0.000674016
NACAP1	1.5142	0.000674478
FAM217B	0.907283	0.000674813
RP11-655M14.13	1.90954	0.000677306
ADRB2	1.28254	0.00068371
RN7SL589P	2.14221	0.000685725
SNORA74B	1.56387	0.000688984
RP11-121C2.2	1.59349	0.000691369
KCNJ2	1.28854	0.000692741
MYSM1	0.957751	0.000693455
EEF1B2	0.712613	0.000700347
RP11-359E10.1	2.09037	0.000701431
RP11-111M22.2	1.628	0.000706702
PERP	0.987849	0.00070696
SPARCL1	0.990861	0.000706976
IGHA1	1.68857	0.000707174
GNAL	1.07708	0.000710227
RP11-428L21.2	1.41903	0.0007129
ABI2	0.973922	0.000715824
PODXL	0.708034	0.000716231
CMA1	1.47701	0.00071696
PMEL	1.31972	0.000719868
CENPV	0.839387	0.000725863
SNORA73B	1.81254	0.00074071
TENM1	1.56782	0.000746479
CLMP	0.889474	0.000747451
CDK6	0.969136	0.000747768
TMEM200C	1.36389	0.000748744
GDPD5	0.735914	0.000749538
PHGDH	1.37373	0.00075192
GTF2IRD2B	1.33157	0.000752677
SCARNA2	1.31748	0.000753254
LRRC2	1.32679	0.00076493
AC079949.1	1.56766	0.000768477
FAR2P2	1.61496	0.00076915
ME3	0.881851	0.000769164
GCLM	0.877586	0.000769718
KLF14	1.45526	0.000772558
EGF	1.72958	0.000785812
RP11-712B9.2	2.01264	0.000785832
MST1P2	1.16075	0.000786982
MPHOSPH8	0.675231	0.000789024
VSIG10L	1.49807	0.000791159
ARL4A	1.08895	0.000793428
ACTN3	2.29368	0.000804001
KY	1.72321	0.000808702
TCEAL2	1.59376	0.000823002
SNORD17	1.40602	0.000825986
TAPT1-AS1	1.00301	0.000826263
CAPS2	1.49554	0.000826574
XXbac-BPGBPG55C20.1	1.7144	0.000827208
LMOD1	0.965828	0.000831681
DAB2IP	0.790569	0.000837934
PPFIA4	1.10322	0.000840888
SNORD94	2.18681	0.000841061
CDC42EP2	0.604764	0.000843749
SPTBN1	0.690132	0.00084499
HPGD	1.58756	0.000845597
ZNF791	0.644507	0.000851051
KLK3	1.32068	0.00085184
SIRPA	0.860063	0.000854443
PTH1R	0.874034	0.000866789
ANPEP	1.16244	0.000870402
TERF2IP	0.661303	0.000873649
LRP2	1.33742	0.000877403
CBX7	0.639823	0.000883935
ADAMTS3	1.69912	0.000890104
SESN3	0.999607	0.000891531
PI15	2.17338	0.000894294
HPS5	0.757988	0.000896465
TPT1	0.566154	0.0008965
PNN	0.80812	0.000899387
RP3-325F22.5	1.51686	0.000906395
RP11-632C17__A.1	1.63737	0.000910649
CTD-2308L22.1	1.63821	0.000912946
PCDH9	1.39031	0.000914793
LGI4	0.280268	0.000924308
B3GNT3	1.62117	0.000929776
PLD1	0.917314	0.000937801
INPP1	0.852907	0.000941347
AGPAT9	1.72997	0.000949944
SPIN4	1.01651	0.000957053
SLC6A10P	2.51036	0.00096172
ZNRF3	0.772179	0.000963803
HGF	1.24317	0.000971856
GDF10	1.65357	0.000982157
FAM133CP	1.92774	0.000986882
COG3	0.65764	0.00098938
CTB-92J24.3	1.62409	0.000989653
IGFBP6	1.27009	0.000992585
TRPC6	1.42259	0.000993951
PCDHB6	1.85253	0.001004
PAN3	0.886944	0.00100681
IGSF1	2.20879	0.00101972
DAPL1	1.91657	0.00102034
RBMS3	0.808375	0.00102828
C12orf39	3.26466	0.00103366
HSPB2	1.02182	0.00103853
IRS1	0.935308	0.00104012
CYP4V2	0.838484	0.00104169
AC021860.1	1.93639	0.00104181
TNS4	1.03917	0.00105449
RP3-406A7.7	0.791551	0.0010565
PCOLCE2	1.80748	0.00106286
RBMXL1	0.908207	0.00106635
PLD5	2.7678	0.00106643
RP11-169D4.1	1.61942	0.00106824
NRXN2	0.792922	0.00106926
ROR1	1.0904	0.00108157
BTBD3	1.15524	0.00108442
RNU12	1.503	0.00109963
PFKFB1	1.51751	0.00110808
SLC13A5	1.70618	0.00111073
PTPRVP	1.07328	0.0011152
PNMAL1	1.59395	0.00111966
CALML5	2.07349	0.00112516
HTR2A	1.61467	0.00113798
RPL13AP25	1.37236	0.00113807
INSR	0.601326	0.00114374
WNT4	1.49139	0.00114393
FBXW7	0.617169	0.00117294
SMYD4	0.950714	0.0011788
CTSG	1.21437	0.00118113
AL133245.2	1.70487	0.0011834
LPHN2	1.07469	0.00118657
MTMR10	0.87666	0.00118782
CLEC3B	1.28606	0.00118879
LPP	0.533328	0.00119262
C3orf55	1.29892	0.00119593
SVOPL	1.74219	0.00119985
ACTA2-AS1	1.75755	0.00120674
RP11-184I16.4	1.42758	0.00120937
CYP1B1-AS1	1.10727	0.00121446
RSBN1L	0.66113	0.00121535
PTGER4	1.13136	0.00122072
RP11-315D16.4	2.51987	0.00122826
RP11-493K19.3	1.89137	0.00123197
LMBRD1	0.733817	0.00123757
SLC12A2	0.837877	0.00124207
TSPYL2	0.809849	0.0012554
RP11-467I17.1	1.3075	0.00125804
CDC20P1	1.31824	0.00127009
ZNF160	0.571454	0.00128002
RP11-685M7.3	1.18066	0.00128075
KAT5	1.54524	0.00128173
CPA2	2.19821	0.00128178
FAM110D	0.836514	0.00129781
RP4-778K6.1	1.00974	0.00129821
ZNF483	1.09521	0.00129912
PLK1S1	0.872276	0.00129984
TRIM52	1.24763	0.00130363
CTD-3032H12.2	1.56146	0.00131054
PTX3	3.02763	0.00131161
RP11-558F24.4	1.11114	0.00131444
CTA-293F17.1	1.14151	0.00131706
CHRNA2	2.59609	0.00131819
LRRTM2	1.66918	0.00131946
HOMER1	1.39128	0.00132571
AC007228.11	0.977405	0.00133585
LIFR-AS1	1.92046	0.00133843
VPS36	0.640609	0.00134842
ARHGAP5-AS1	1.4214	0.00136169
SVIL	0.884356	0.00136224
SLC25A3	0.998709	0.0013651
LPAR3	1.68046	0.00136877
GLRA3	3.15329	0.00138918
BEX2	1.04003	0.00138931
AMPD1	2.23414	0.00139247
RECK	0.731907	0.00140174
PDE2A	0.942159	0.00141472
U1	1.87074	0.00142574
ITIH3	0.925783	0.00142685
RP11-531A24.5	1.17513	0.00143587
RPL31	0.815176	0.00143633
NSUN7	1.18203	0.00143757
SHE	0.949781	0.00144411
HOXC-AS1	1.22681	0.00145036
GLB1L3	2.20346	0.00145055
JAG2	0.653495	0.00145103
CPB1	2.89897	0.00145453
HMGCLL1	2.22475	0.00145521
ARHGEF5	0.951834	0.00146399
RP11-315O6.1	1.15822	0.00148601
GPATCH8	0.793406	0.00149093
RBBP8	1.1489	0.00149639
SOCS2	0.966657	0.00150631
OXER1	0.951396	0.00150636
NPAS3	1.16265	0.00151076
RP4-717I23.3	1.06712	0.00151975
AC022007.5	1.01703	0.00153451
ZBTB44	1.1005	0.00154368
PALM2	1.33443	0.00154507
PHACTR2	1.0333	0.00155446
PACRG	1.85758	0.00156207
CHRM3	1.79786	0.00156442
FGF10	1.93668	0.00157714
BNC1	2.37693	0.00157816
CTD-2369P2.2	0.524284	0.00157923
BCL6	0.877309	0.00158587
SCN3B	1.14969	0.00158808
RP11-1035H13.2	1.78593	0.00159887
CDCA7L	1.08984	0.00161136
SREK1	0.73144	0.00161693
SMAD9	1.00876	0.00162656
WASF1	0.76246	0.00162763
USP2	0.860558	0.00163248
THRA	0.668337	0.00163436
ENHO	1.10524	0.00164631
GYPC	0.688886	0.00165288
PAIP2B	0.85638	0.0016695
NXNL1	1.57553	0.00167607
MICU3	1.05566	0.00167645
SCARNA13	2.01582	0.00167972
DLEC1	1.07997	0.00167976
TSLP	1.61516	0.00168002
RICTOR	0.74096	0.00168541
LIAS	0.789482	0.00168544
CA6	1.83936	0.00169481
SNORA11	1.83675	0.00170705
KCNJ14	1.12872	0.00170834
MATN2	1.28559	0.00170949
MCCC1	0.945237	0.00171203
RP11-339B21.13	0.760485	0.00173092
NCL	0.761806	0.00173105
DTNB	0.830391	0.00174764
AKR1C2	1.43359	0.00175048
UBL4B	1.17015	0.0017544
MMRN2	0.868617	0.00175544
AMY2B	1.39853	0.00175873
RPL35	0.764504	0.00176283
PTPN4	0.855445	0.00177726
TCEANC	0.983651	0.00178006
SFT2D2	0.704662	0.00178291
MYBBP1A	0.676426	0.00178557
EDA	0.961204	0.0017925
MLYCD	0.804947	0.00179395
WDR86-AS1	1.22105	0.00180111
SCARNA18	1.21936	0.00181334
KIAA1045	0.93314	0.00181549
DMC1	0.870761	0.00182722
TUB	0.950806	0.00183077
SSBP2	0.728799	0.00183425
PCDH20	2.39351	0.00184325
CRYBG3	2.23267	0.00184765
PDE7B	1.28641	0.00187089
RPL10	0.950434	0.00187289
ALDH3A2	0.633374	0.0018791
LPP-AS2	1.18016	0.00190291
SMOC1	1.28313	0.00190558
COL7A1	0.636857	0.00190559
NFIL3	1.29541	0.00191689
RP11-286E11.2	2.36021	0.00192003
RP11-157P1.5	1.08038	0.00192336
ALDH1A2	1.27387	0.00192632
SCN4B	0.986573	0.00192674
FZD9	1.28583	0.00194252
RBM26	0.813767	0.00194679
RP11-181G12.2	0.801473	0.00195526
FOSL1	1.27913	0.00197052
RPS18P12	0.659442	0.00197103
LETMD1	0.708549	0.00198731
SCARNA17	1.20875	0.0019875
MTURN	0.731744	0.0020098
ZNF542	0.810853	0.00201024
ZBTB16	1.45296	0.00201532
IGF2	1.12718	0.00202498
ZNF462	0.70999	0.00204632
GALNT12	1.57855	0.00205784
RPL31P11	1.04271	0.00205952
RNF38	0.857014	0.00206292
CDK13	0.733739	0.00207692
SACS	1.26327	0.0020819
RNASE4	1.29578	0.00208655
RP11-130L8.2	0.782239	0.00208725
SIDT2	0.510927	0.0020883
LINC00667	0.679051	0.00209486
UBE3D	1.01806	0.00209945
GLTSCR1L	0.732778	0.00210273
FMO1	0.948069	0.00210695
PPM1N	1.14955	0.00210791
DYNC2H1	1.14387	0.00212461
NBEA	1.06579	0.00213809
NTRK3	0.980486	0.00214902
RNU1-83P	2.19247	0.00216403
RP11-817O13.6	0.618918	0.0021678
S100A5	1.17604	0.00218442
MIR29A	1.33181	0.00219422
HARS	0.747825	0.0022068
HNRNPH1	0.86033	0.00221503
RP11-529H20.6	1.39449	0.0022172
LGALS4	1.86704	0.00222209
AADAT	1.03573	0.00223415
ZNF274	0.918125	0.0022373
UBE4A	0.979901	0.00224359
RPS10	0.746499	0.00226685
CCRN4L	1.13919	0.00229963
RP11-454H13.1	1.57804	0.00230102
RIPK4	1.46488	0.00231536
EEPD1	0.724613	0.00233661
HINT3	0.893525	0.00235112
TPTEP1	0.919267	0.00235996
RP11-118B18.1	1.72371	0.00237308
RPS12P26	2.00639	0.00239128
CPED1	0.865102	0.00239208
NR3C2	1.08544	0.00239636
ZNF488	2.48266	0.0024126
NISCH	0.445226	0.0024188
PNRC1	0.71662	0.00242349
SYCE1L	1.07049	0.00242837
ACADL	2.27449	0.00243166
ACTA2	1.14836	0.00244116
RP11-849H4.4	1.61586	0.00244119
KAZN	0.568952	0.00245166
SENP6	0.900864	0.00246268
VSNL1	1.3236	0.00247388
C19orf57	0.837331	0.00247693
CCNG1	0.935638	0.00248246
JAM2	0.935511	0.00248596
UBAP1L	0.624226	0.00249584
CTD-3247F14.2	1.67028	0.00250448
XXcos-LUCA11.4	0.727355	0.00251266
ZCCHC5	3.11023	0.00251432
TSPAN5	0.854777	0.0025176
RP11-817J15.3	2.4951	0.00251986
BEGAIN	0.795966	0.00253601
FTX	1.44851	0.00253877
RSBN1	0.721473	0.00254824
TRIM9	1.20191	0.00255107
WISP3	1.38364	0.00255684
CLEC4M	2.57002	0.00257674
FGGY	0.969237	0.00258535
RP4-756G23.5	1.43623	0.00259627
DPYSL2	0.786785	0.00259798
ATP11A-AS1	1.26202	0.0025995
ZNF600	0.747055	0.00260631
IER5	0.869688	0.00261932
OVCH2	2.14926	0.00262345
PAWR	0.711215	0.00262509
GATS	0.548829	0.00262964
TRAF3IP2-AS1	1.03227	0.00263661
SCARNA9	1.06389	0.00264942
RP4-605O3.4	1.07367	0.00266852
BRAF	0.914602	0.00266997
DHX33	0.569287	0.00268176
ANAPC4	1.00652	0.00268998
RP11-474O21.5	1.48874	0.00269368
CTD-2328D6.1	1.90796	0.00269792
SOBP	0.816388	0.00271415
HS6ST2	1.41282	0.00272256
ZDHHC8P1	0.938582	0.00275655
EIF5	0.6528	0.00276366
SMAD3	0.522025	0.00277124
METTL16	0.462781	0.00277823
SDR42E1	1.3945	0.00278485
ADD3	0.845311	0.00278808
TGM1	0.698308	0.0028053
YAP1	0.643677	0.00281398
AP001469.9	0.941248	0.00282529
FAM124A	0.855358	0.00283154
VSTM5	1.50631	0.00283339
AHNAK	0.566573	0.00284448
RP11-760H22.2	1.15063	0.00285809
GIGYF2	0.683418	0.00285818
EPHX2	0.872384	0.00286761
PRKCE	0.859645	0.00286928
PCYOX1	0.623223	0.00287359
PKP4	0.673095	0.00287843
CMYA5	0.824793	0.00287866
TEAD1	0.880117	0.002887
RNU2-60P	2.8551	0.00289802
CLIP3	0.662383	0.00291954
DSC2	0.963245	0.00292927
SULT1C4	1.58186	0.00296258
RNA5SP366	2.82575	0.0030072
MRPL43	0.47303	0.00300954
SCN5A	1.7343	0.0030101
RP11-849F2.9	1.36813	0.00302291
BDKRB2	0.882698	0.00302986
THBD	1.07468	0.00303666
PTCD3	0.422856	0.0030374
EEF1A1	0.60229	0.00304765
RAPGEF3	0.74019	0.00306705
TLK2	0.837901	0.00306885
MST1	0.67357	0.00307915
MT-TC	1.166	0.00307991
MACROD2	1.26613	0.00308213
C21orf90	1.41918	0.00309275
LHB	1.05193	0.00310013
NR1H3	0.551559	0.00310455
RP11-15H20.5	1.33511	0.00313141
CLYBL	0.908818	0.00314734
VIT	1.25239	0.00317082
ZNF843	1.02324	0.00318318
RP4-765C7.2	0.942099	0.0031908
SETD5-AS1	0.875816	0.00320198
RNU4ATAC	2.25096	0.00321717
SNORA53	1.54156	0.00322503
RP11-875O11.1	1.25264	0.00322853
ECHDC1	0.785734	0.00322971
COL9A3	1.07746	0.00323435
RBPMS	0.506203	0.00323556
HYPK	1.4814	0.00324349
PABPC4L	1.14602	0.00326292
TRMT11	1.09549	0.00326572
ZNF660	1.26602	0.00327034
TLE2	0.656804	0.00327685
TGM5	1.94117	0.00328125
IRF2BPL	0.577373	0.00328392
KCNIP3	0.634697	0.00329003
METAP2	0.579438	0.0032908
ADAMTS9	1.27376	0.00330397
ZNF493	0.830906	0.00330881
SH2D3A	0.601147	0.00331669
RNA5-8SP6	1.40378	0.00331852
ZFP36L2	0.89472	0.00331915
LINC01125	0.934459	0.00332588
TM4SF18	1.00193	0.00334044
PTH2R	1.75753	0.00335177
RP11-215P8.3	2.33236	0.00335423
NMUR1	1.47893	0.00336906
GSG1L	1.43641	0.0033746
KMT2A	0.586235	0.00339003
EPB41L1	0.426315	0.00339182
RP11-734J24.1	1.18717	0.00343628
SH3BGR	0.933762	0.00344321
PIP5K1B	1.13321	0.00344596
WBP2NL	1.05425	0.00345026
WEE2-AS1	1.41532	0.00345884
RP11-689P11.2	1.33969	0.00346062
TMEM221	0.784198	0.00349509
SOX17	0.966395	0.00350386
KIAA1731	1.9495	0.00353273
CC2D1A	0.627056	0.00353715
ZNF667-AS1	1.03693	0.00356814
SLC16A4	0.764038	0.00356906
ETV6	0.540262	0.00357717
PTRF	0.612987	0.00358746
ST8SIA2	1.47965	0.00360329
RN7SL336P	1.45767	0.00360945
CCDC14	0.908833	0.0036107
BAI1	0.951707	0.00362349
RPL24	0.605059	0.00365182
WBSCR17	1.12424	0.00366117
RPL12	0.970135	0.0036761
GATAD1	0.715008	0.00367687
ABHD14B	0.650202	0.00368839
SLC24A1	0.697026	0.00369594
HIST1H4E	1.32576	0.00369806
RP11-66N24.4	0.866054	0.00371186
RPS5	0.883826	0.00371695
TOPORS	0.737387	0.00373501
CYB5D2	0.504556	0.00374196
RP11-399E6.4	1.14996	0.00374785
SMARCC1	0.790735	0.0037604
FGF7	1.0955	0.00376672
RP11-51O6.1	1.01946	0.00377079
WDR60	0.867979	0.00381733
TTN-AS1	1.05799	0.00381877
SNORA42	1.32068	0.00382027
ZRANB2	0.692026	0.00383333
RPL35P3	0.951183	0.0038339
ZNF561	0.782773	0.00383581
MAML3	0.923042	0.00384404
DAAM2	0.846942	0.00385826
ZNHIT6	0.773036	0.00387052
DSC3	1.40164	0.0038798
RPS23	0.608016	0.003882
RP11-5C23.2	0.958956	0.00389454
RPS2P48	1.22885	0.00389532
ADH5	0.497746	0.00390742
CAPN12	1.52066	0.00392889
TSHZ3	0.793501	0.00394964
BDNF-AS	1.02555	0.0039555
DLL1	1.03526	0.00396086
TMEM59L	1.06291	0.00396707
RNF122	0.785743	0.00396709
AL592183.1	1.07054	0.0039755
AC004893.11	1.57997	0.00398118
AACS	0.7854	0.0039853
PHIP	0.699483	0.00400962
PELI2	0.747732	0.00401523
EMILIN3	1.43626	0.00401872
HNRNPA1	0.786684	0.00403509
TTC28	0.77796	0.00406224
ISM1	0.865625	0.00406834
RP11-252A24.7	0.768248	0.00407128
RP11-350N15.6	1.65153	0.00407772
AC069154.4	1.13204	0.00408253
KCNH8	2.27081	0.00408868
CPS1	1.29444	0.00410618
COL27A1	0.752191	0.00411976
CD34	0.731048	0.00412007
MLTK	0.519503	0.00412416
MCC	0.617578	0.00413712
AKR1C3	1.00081	0.00413909
C1orf61	1.47739	0.0041403
FANCE	0.618286	0.00415961
NFE2L2	0.555156	0.00416382
DFNB59	1.45562	0.00417465
FAM107A	1.11279	0.00419043
CTC-458A3.1	1.33332	0.00420156
ETV1	0.843859	0.00420322
SDK1	0.811982	0.00424705
JPH4	0.918706	0.00425658
ZNF614	0.956403	0.00428598
ZNF207	0.606915	0.00428735
ERCC5	0.577827	0.00428941
ZFYVE21	0.576482	0.0042949
N4BP2L1	0.648176	0.00432203
AC025811.3	2.05769	0.00434979
RPL18	0.701984	0.00435281
RP11-119F7.5	1.06657	0.00435667
CES4A	0.922951	0.00436737
ANKK1	0.999844	0.00438476
FBL	0.826822	0.00440245
RP11-486G15.2	1.36387	0.00441483
ZNF662	1.06901	0.00443089
RP11-941H19.2	1.17906	0.00445971
RAPGEF2	0.914401	0.00446151
PDE11A	1.28689	0.00446199
COL26A1	1.1705	0.00447513
GHR	0.96366	0.00448149
EIF4B	0.615703	0.00451635
MAP3K5	1.04164	0.00452274
RP3-402G11.25	0.782999	0.00454088
SESN1	0.742836	0.00454731
ERG	0.676422	0.00459336
ST7-AS1	1.00483	0.00462063
PER1	1.09374	0.00462106
ANKRD17	0.615576	0.00464047
RP11-290O12.1	1.47105	0.00464499
HSPB7	1.41949	0.00467666
CTD-2349P21.5	1.53326	0.00470376
MARCO	1.09874	0.00470783
LY6K	1.37203	0.00470937
ENTPD2	0.689849	0.00471574
AC105399.2	1.03116	0.00472571
RP11-941H19.1	1.26391	0.00475218
LYAR	0.54032	0.00477914
CTB-131B5.5	1.38276	0.00478054
2018-03-01	1.25662	0.00479782
CAV1	1.09328	0.00480231
COLCA2	1.07913	0.00480373
ZNF391	1.15354	0.00481738
AC018470.4	1.1008	0.0048207
FAM43A	0.592527	0.00482279
RP11-269F20.1	1.23143	0.0048316
MBNL2	0.709261	0.00484464
GMDS-AS1	0.906232	0.00485259
BACH2	0.79617	0.00487087
RP11-390E23.6	0.707996	0.0048857
NIPAL3	0.50861	0.00488642
IRX6	1.35662	0.00488754
CNKSR3	1.18205	0.00488944
RP11-395B7.7	0.490021	0.00491076
FOXP2	1.44611	0.00491302
PCNP	0.957703	0.00491453
FRZB	0.849448	0.00491785
ARRB1	0.530197	0.00499837
MKLN1	0.733467	0.00500362
RND2	1.22173	0.00501691
LL22NC03-2H8.5	1.54947	0.00503896
FER1L5	1.18557	0.00504507
HNRNPD	0.438818	0.00506472
NCMAP	1.24143	0.00508151
SLC16A12	1.11411	0.00508765
RP11-107N15.1	0.97119	0.00515277
RPS2P5	0.963868	0.00515692
PLK2	0.996022	0.00516059
ANP32B	0.671634	0.00517422
CTC-431G16.2	1.74102	0.0051841
ATP1A2	1.45428	0.00518478
MPP6	0.92024	0.00519767
CREBZF	0.7712	0.00523485
GK5	0.983513	0.00524459
SAMD4A	0.804753	0.00525257
A2M	0.722841	0.00525291
ROCK2	0.626824	0.00526199
ZMAT1	0.894545	0.00526218
RP11-298J23.8	1.57567	0.00529028
CIRBP	0.533772	0.00529773
SPEG	0.637367	0.00531389
TMPRSS12	1.58413	0.00532032
TMPRSS13	0.820984	0.00533743
E2F6	0.888022	0.00534471
GPER1	0.934298	0.00536006
GABPB1-AS1	1.11837	0.0053882
SGK2	1.20608	0.00540526
KCNJ16	1.49499	0.00540545
PRPF38B	0.774531	0.00542391
RP11-386I14.4	1.28923	0.00542928
BDH2	0.819124	0.00543018
SNTB1	0.941501	0.00543401
SKIV2L2	0.779129	0.00543631
SRSF5	0.502862	0.00543642
CCDC84	0.713344	0.00547112
TBC1D15	0.767619	0.00547842
RPS13	0.692792	0.00549561
ABLIM1	0.728849	0.00550568
PDK4	1.14446	0.00550744
PEBP4	1.08733	0.00550785
REM1	0.81845	0.00550847
TUSC3	0.962988	0.00552001
HNMT	0.662512	0.00552796
DDX21	0.94565	0.00552891
NAP1L2	1.351	0.00554417
CD248	0.698854	0.00555727
ZNF789	0.702636	0.00556828
TNNC1	1.11437	0.00558457
HPS4	0.574458	0.00559974
TRIM68	0.979152	0.00562166
EBLN2	2.14939	0.00569917
CTC-559E9.5	1.49337	0.00572904
CACNA1A	0.54171	0.00574721
ZFC3H1	0.825354	0.00576336
PEX5	0.627887	0.00577223
SUN1	0.6951	0.00578399
ECI2	0.916857	0.00579391
TBX15	0.946207	0.00580512
TMEM168	0.61108	0.00581986
PTPRG	0.633475	0.00583814
PTGS2	1.4737	0.00584089
RPL13	0.922269	0.00590861
CWF19L2	0.740367	0.00590865
PRPF38A	0.595482	0.00591014
TUBA3FP	1.43326	0.00591927
ARL10	0.910434	0.00593916
CCDC136	0.844294	0.00594182
PER2	0.843784	0.00594967
EXOSC2	0.625435	0.0059513
TRA2B	0.560173	0.00596912
CES3	1.48293	0.00597836
CTB-152G17.6	1.22648	0.00598866
ARID4A	0.683203	0.00599102
ARHGAP5	0.691197	0.0060254
CTD-2184C24.2	1.53224	0.00609743
IL33	0.94453	0.00610534
DICER1-AS1	0.593354	0.00612704
ADAM1A	0.901545	0.0061365
RP11-454F8.2	2.20632	0.00615079
CEP44	0.963247	0.0061536
SCG5	1.40096	0.00615929
FRMD1	1.3444	0.00616616
HEXIM1	0.465931	0.00617683
RPL21P135	1.09442	0.00617757
GAS5	0.788531	0.00618439
RP11-363E7.4	1.0134	0.00618703
CBLN4	1.67751	0.00619087
CTD-2020K17.4	0.854505	0.00626896
TUBG2	0.778599	0.0062711
DCN	0.827769	0.00627282
IGLC7	1.78447	0.00630237
CBLB	0.788479	0.00630503
PALMD	0.773039	0.00631374
RSF1	0.758997	0.00635006
C17orf107	0.69334	0.00635027
FXYD6	0.766544	0.00635031
GCFC2	0.676832	0.00635064
RPL3P1	1.43083	0.00641181
NR2F2-AS1	1.48073	0.00643192
EPC1	0.717182	0.00646522
TAF4B	1.02611	0.00648012
TNN	0.914008	0.00649101
RP11-140L24.3	0.939622	0.00649525
WDPCP	0.666283	0.00651441
AHDC1	0.511572	0.00653162
RP11-242F4.2	1.86444	0.00654237
ODC1	0.795997	0.00654276
LINC00342	1.21715	0.00654671
TMEM245	0.445284	0.00655055
BIN1	0.67085	0.00656385
KIAA0020	0.606415	0.00657457
HBB	1.4019	0.00659872
CCL8	1.29151	0.00660136
RBBP4	0.734041	0.00660614
RP1-28O10.1	2.01791	0.00661271
NOG	0.904322	0.0066388
C20orf194	0.618432	0.00664821
NUDT7	0.792829	0.00667015
PHLPP1	0.645867	0.00667192
ZNF518A	0.841836	0.00667616
UST	1.06941	0.00669471
CTD-2562J17.7	0.777993	0.00669626
DENND4C	0.433019	0.00670199
RP11-101P17.11	2.00069	0.00670599
CDC42EP4	0.722565	0.00670944
RNF145	0.782765	0.00672032
IL6R	0.99514	0.00672462
RP11-1002K11.1	1.32408	0.00673709
CDC14A	0.959692	0.00673717
DNAH17	1.06892	0.00674074
SLC22A11	1.19161	0.00674545
DCBLD2	0.652986	0.00674734
EMC1	0.450556	0.00675589
RN7SL2	1.53391	0.00677735
DCDC2	1.38624	0.00680027
CAT	0.962089	0.00680798
RPL3P9	1.11296	0.00681157
LIPT1	0.862585	0.00681205
KLRK1	1.96	0.00681596
FLT1	0.734774	0.00690639
COX7A1	0.699202	0.00692723
CFDP1	0.493217	0.00692897
GLS2	1.02177	0.00694057
AC006445.6	1.4719	0.00703176
RPL35P9	0.930997	0.00705558
CCDC82	0.895109	0.00705809
MDN1	0.781051	0.00708131
PCBP4	0.564601	0.00711943
HEPACAM	1.17982	0.00715621
GPM6A	0.938917	0.00718557
C3orf17	0.606239	0.00718825
RP3-340B19.5	1.11263	0.00722297
AGBL5-IT1	1.33804	0.0072231
Z83851.1	0.901135	0.00731969
GCK	0.849355	0.0073296
UPF2	0.586841	0.0073676
MEOX1	1.19944	0.00738773
MROH7	0.745546	0.0073899
BTF3	0.629304	0.00740173
CYR61	0.832174	0.00743376
EFHC1	0.72508	0.0074365
RP11-923I11.6	0.882422	0.00745635
CHD9	0.5075	0.00750336
SOX9	0.835512	0.00753579
AC005943.4	1.82832	0.00757714
N4BP2L2	0.464684	0.0075944
PLXDC1	0.677482	0.00760787
NPIPB11	1.85491	0.00761846
ALG9	0.825392	0.00763263
MAEA	0.851927	0.00765027
SMG8	1.64182	0.00766303
TBX18	0.924444	0.00773601
RP11-83A24.2	0.700554	0.00775913
C7orf61	0.905949	0.00777366
SYTL5	1.77325	0.00777876
AL928768.3	1.22087	0.00781959
TRMT5	0.703205	0.00782908
CCDC102A	0.561049	0.00784144
POLR1C	0.518098	0.0078438
BMP5	1.77498	0.00785553
SCARNA10	1.20851	0.00785749
TEX10	0.758542	0.00786962
SNHG1	0.945067	0.00788408
BCLAF1	0.65684	0.00789056
RPS2P45	1.12396	0.00792262
MT1M	1.11088	0.00794243
AP000347.2	1.04614	0.00795113
NCOR1	0.800858	0.00795369
ASS1	0.761666	0.00796703
RASL12	0.715145	0.00799631
MUC15	1.5912	0.00804394
CAB39L	0.621804	0.00804913
SOX7	0.802594	0.00805299
ZNF277	0.609291	0.00805443
RP11-861E21.2	1.35534	0.00805619
RP11-698N11.4	1.0899	0.00805918
RP11-890B15.3	1.06537	0.00806799
TENC1	0.581105	0.0080887
LAMB1	0.65609	0.008112
PROS1	0.830993	0.00811299
RGL1	0.79865	0.00812459
PDZK1	1.31455	0.0081315
PCAT1	1.70404	0.00820251
MSLN	1.19351	0.00823823
TMEM150C	0.890313	0.00824518
VCPKMT	0.945772	0.00825439
WFIKKN2	1.18126	0.00827584
RP11-159N11.4	1.3553	0.00830878
SKOR1	0.966214	0.00835393
ZSCAN18	0.794333	0.00836543
LDHAL6A	2.58127	0.00837232
ADCY1	1.01998	0.00839832
ESRRG	1.16328	0.00839941
RP11-389O22.4	0.817269	0.00846661
TPM1	0.766596	0.00846689
RP1-20N2.6	1.53796	0.00847467
ACPT	1.74376	0.0084869
WASF2	0.477312	0.00848987
L3MBTL1	0.89616	0.00850784
FBXO17	0.639082	0.00852371
IQSEC3	0.686343	0.00855095
CARF	0.895191	0.00858844
BEX4	0.810126	0.0086245
NPAS4	1.04632	0.00862572
RP13-36G14.4	1.23124	0.00863907
CALB2	1.16443	0.00865845
CTNNAL1	1.00726	0.00866791
TM4SF1	0.856643	0.00868595
PIP5KL1	0.719028	0.00868682
DHX15	0.782931	0.00869127
GBP1P1	1.37103	0.0087019
RP11-12M9.3	1.22417	0.0087064
RPL13P12	0.84455	0.00873282
CD200	0.740168	0.00878611
MYO18A	1.02321	0.00878641
COG8	0.651754	0.00879225
SLC27A1	0.687053	0.00880251
ANK3	0.828805	0.00891209
RIMKLB	0.815603	0.00891457
NMRK1	0.582054	0.00896952
AP000438.2	1.25292	0.00901484
CTD-2576F9.2	1.27803	0.00901594
RP11-16P6.1	0.952061	0.00904514
LINC00617	2.65797	0.00907094
LA16c-OS12.2	0.617969	0.00907171
ABT1	0.663432	0.00907361
CCL21	1.05612	0.00909746
C17orf51	0.600117	0.00916067
RADIL	0.725635	0.00919623
CLK4	0.878976	0.00921836
AMIGO1	0.853194	0.00924774
OSER1-AS1	0.715052	0.00927425
GTPBP8	1.35693	0.0092871
HOXA2	1.1238	0.00930133
ZNF121	0.77384	0.00930473
UBE2Q2P1	0.937712	0.00935149
EIF3E	0.637996	0.00935449
ZNF140	0.945561	0.00936604
RPL36	0.718897	0.00938143
POU3F3	2.15318	0.00940563
CDNF	1.1154	0.00941628
RP11-85G20.1	0.950009	0.00943132
RP11-680G24.5	0.890471	0.00943509
ZMYND15	0.513625	0.00944029
RP11-18I14.10	0.606735	0.00944974
NR3C1	0.730607	0.00945081
MOCS1	0.806851	0.00948226
PPP1R12A	0.615858	0.00950475
METAP1	0.780246	0.00951924
SHBG	0.724255	0.00951929
CKMT2	1.34133	0.00954
RPS4XP6	0.820046	0.00955358
KIF12	1.13531	0.00955977
RP11-111M22.3	1.05358	0.00956109
PRR7-AS1	1.18654	0.00957514
RNA5SP355	2.42251	0.00959213
RILPL1	0.889868	0.0095996
RP11-328M4.2	1.46896	0.0096001
RPL21P44	1.01184	0.00961261
ECHDC3	0.636413	0.00961333
MBIP	0.800331	0.00961721
RNA5S9	3.01403	0.00961944
ILF3-AS1	0.626045	0.00965043
CSF3	2.19428	0.00966539
TRDN	2.08069	0.00966677
SCARNA1	1.74456	0.00967133
ADH6	1.67027	0.00968566
SPAG16	0.807269	0.0097657
TSPAN6	0.757989	0.00980532
AUH	0.585696	0.00981615
TRIM56	0.698129	0.00984445
WDFY2	0.592219	0.00986551
LTBP4	0.798311	0.00988669
RHBDD1	0.643723	0.00989094
RP11-344H11.4	1.37752	0.00989361
JAM3	0.710298	0.00989729
CROCCP3	1.01882	0.0100011
ZNF10	0.938729	0.0100774
TNS1	0.929888	0.0101003
RP11-138A9.2	1.09128	0.0101266
DZANK1	0.805588	0.0101397
ZNF22	0.743578	0.010153
THRB-IT1	2.09148	0.0101706
KBTBD7	0.734001	0.0101922
SNORA7B	1.59384	0.0102103
RIN1	0.59375	0.0102289
RIOK1	0.590079	0.0102297
RP11-385F5.5	0.835398	0.0102348
TBX19	0.996669	0.0102434
ATP11A	0.738271	0.010289
ACAD8	0.680633	0.0103345
GSTO2	0.577119	0.0103388
STAR	1.2752	0.0103698
RP11-430G17.3	0.669121	0.0104126
MUC20	0.881046	0.0104309
STEAP4	1.04352	0.0104619
MPDZ	0.813856	0.0104772
CCDC69	0.68261	0.010494
ICA1L	0.719341	0.0104992
ATP2B1	0.720999	0.0105094
ADCY10P1	0.977489	0.0105391

## Sheet: STAR_edgeR_up_Normal_v_IDC
Gene ID	log2FC (NvI)	p-value
NDRG2	2.4758	2.80458e-13
CD300LG	3.33199	3.77895e-12
ALX4	3.23072	9.58835e-12
LAMC3	2.83218	1.88809e-11
BTNL9	2.26061	2.63269e-11
MME	2.42934	4.04863e-11
PRX	1.47287	4.16906e-11
ADAMTS5	2.38853	5.75896e-11
NES	1.60612	7.17027e-11
KIT	2.93782	7.34321e-11
OXTR	3.52828	1.13213e-10
RP11-161M6.2	2.57105	1.58835e-10
NRG2	2.94373	2.37955e-10
AC131025.8	2.57722	2.50273e-10
NFIB	1.78314	3.28104e-10
TNNI2	2.49804	3.45778e-10
CA4	4.04637	3.52414e-10
FIGF	4.62505	3.80346e-10
SOX8	2.83126	4.67802e-10
CHRM1	4.39216	5.04824e-10
RASGEF1C	3.65202	5.32954e-10
CCL28	3.15647	5.36647e-10
TRIM29	2.42731	5.79646e-10
ABCA10	2.78405	6.13543e-10
AC016995.3	4.78777	6.33698e-10
ETV3L	4.82483	7.17975e-10
FAM3D	4.55905	7.57582e-10
SMYD1	4.45092	8.7873e-10
SPRY2	2.23377	1.03866e-09
PPP1R14A	1.98705	1.2802e-09
TMEM213	5.13447	1.45927e-09
FBLN5	1.48355	1.92691e-09
SAMD5	3.39353	1.98512e-09
GPC3	2.30871	2.41075e-09
TMEM178A	2.26716	2.64466e-09
RP11-292F22.7	4.49181	2.7297e-09
ROPN1B	4.20799	2.97924e-09
C1orf95	2.5391	3.14598e-09
KCNMB1	2.36285	3.2886e-09
MIR143HG	2.34917	3.5547e-09
ELF5	3.63766	3.80591e-09
CX3CL1	2.39932	4.40487e-09
TNNC2	1.59763	4.73787e-09
PIGR	4.75372	4.79498e-09
PAK3	2.53627	4.84527e-09
SFRP1	3.04054	4.90998e-09
CRYAB	2.25149	5.58699e-09
S100B	2.48578	5.74909e-09
SLC13A2	3.81476	5.8776e-09
CAPN11	2.48818	6.52102e-09
FAM150B	4.25048	6.8351e-09
FAM189A2	2.25052	8.29953e-09
ITIH5	1.911	8.58712e-09
FMO2	2.08345	1.00142e-08
DENND2A	1.6986	1.048e-08
RP11-93B14.5	4.47174	1.21715e-08
TTYH1	3.54905	1.32554e-08
CDH4	2.74242	1.32698e-08
SYT8	2.87649	1.42306e-08
JPH2	1.98394	1.54548e-08
ABCA9	2.37069	1.65322e-08
CNTFR	2.75316	1.67252e-08
DMD	1.97487	1.89761e-08
SEMA5A	1.80313	1.98071e-08
CELF5	2.8353	2.13091e-08
MAGI1	1.3641	2.28838e-08
FAM3B	4.00082	2.83412e-08
ADCYAP1R1	2.22314	3.1561e-08
COL6A6	4.04241	3.25534e-08
SAA1	2.79711	3.35657e-08
SOX10	3.2374	3.79323e-08
APBA1	1.69508	4.15004e-08
ADAM33	1.92242	4.19622e-08
CACNA1G	2.14662	4.33158e-08
EDN3	3.23051	4.33161e-08
TCF7L2	1.56139	5.19117e-08
PAMR1	1.89913	5.62987e-08
GABRP	3.13087	5.66692e-08
KLF5	2.16892	6.08518e-08
MEIS2	2.08259	6.49378e-08
RP11-211G23.2	4.21726	6.72896e-08
PLEKHH2	2.01448	7.34798e-08
FZD7	1.70239	7.62325e-08
IL17B	2.85389	7.77938e-08
ANO1	1.39954	7.87367e-08
C2orf40	2.87286	8.22433e-08
CMTM5	2.95363	8.78859e-08
CFD	2.407	8.94078e-08
PTPRZ1	2.70489	9.35013e-08
OLFML2A	1.59672	9.73872e-08
LOXL4	2.55702	9.87635e-08
PDZD4	1.44974	9.91978e-08
SLC7A3	3.42944	9.95132e-08
TPT1-AS1	1.29815	1.13538e-07
TP53AIP1	2.55071	1.13876e-07
DPP6	1.67994	1.19275e-07
SCARA5	2.68452	1.21618e-07
TESC	2.09305	1.27187e-07
PDE1C	2.49961	1.27475e-07
NTF4	2.81208	1.38233e-07
NPM2	2.25471	1.39766e-07
TP63	2.08722	1.50114e-07
CAPN6	2.72902	1.59963e-07
CNN1	2.06891	1.67617e-07
GPR144	4.40147	1.68121e-07
ACTG2	2.5269	1.74017e-07
GPRC5B	1.71157	1.79425e-07
DST	1.78377	2.07507e-07
RELN	3.11364	2.25231e-07
OBSCN	1.28916	2.31385e-07
APCDD1	1.91346	2.42505e-07
SAV1	1.25379	2.55923e-07
EIF3L	1.09247	2.82e-07
KCNN4	2.17156	2.91575e-07
PRDM8	1.7032	2.92495e-07
SCN4A	1.68978	2.93601e-07
WDR86	1.68089	2.93628e-07
FAT2	2.40671	2.9623e-07
TSHZ2	1.6964	3.02323e-07
SRPX	1.97923	3.04715e-07
SOSTDC1	3.3395	3.06275e-07
EDNRB	2.17571	3.11692e-07
LINC00640	2.71968	3.61107e-07
DLK1	4.28967	3.82758e-07
IRX1	2.46382	3.94327e-07
OSR1	1.81995	3.96551e-07
GLTSCR2	1.32516	4.2457e-07
DCX	3.52688	4.26251e-07
APCDD1L	3.30194	4.32643e-07
PDGFA	1.46082	4.91088e-07
RSPO1	2.64833	5.10451e-07
LINC00086	2.13305	5.27707e-07
FREM1	2.56792	5.38139e-07
FOLR1	3.5474	5.73794e-07
RP11-154D6.1	2.24586	5.85745e-07
AIF1L	1.99466	6.19457e-07
ZNF667	1.77385	6.71252e-07
MUC4	3.41205	6.98834e-07
TNNI1	3.87453	7.09687e-07
TRIM2	1.36894	7.25183e-07
RGAG4	1.19976	7.44065e-07
DLK2	2.43248	7.52625e-07
RPS6	1.30877	7.89242e-07
ABCA6	1.69227	8.05139e-07
NSG1	2.02499	8.17874e-07
HCG11	1.2372	8.35125e-07
LEPREL1	1.26088	8.89669e-07
MYOM2	2.28663	9.21664e-07
WNT6	1.89357	9.49916e-07
CXCL6	3.37335	9.63383e-07
C2orf82	3.0634	1.03136e-06
LGR6	2.09585	1.05043e-06
CXCL2	3.63583	1.0719e-06
PENK	5.25631	1.08637e-06
FGF17	2.06444	1.09666e-06
APCDD1L-AS1	3.82559	1.13101e-06
CD164L2	1.95591	1.15262e-06
COL23A1	1.57039	1.25889e-06
GSTM2	1.83513	1.29382e-06
RNF150	1.37896	1.31688e-06
SLC16A11	2.32545	1.33534e-06
GPIHBP1	1.82518	1.34727e-06
SEMA3G	1.59186	1.34952e-06
IL11RA	1.3732	1.37696e-06
PI3	3.1979	1.42875e-06
CPE	2.38847	1.43306e-06
HS3ST6	2.94185	1.43877e-06
RP11-469H8.6	3.53093	1.44116e-06
MIR145	1.81795	1.45278e-06
RYR1	1.54185	1.47642e-06
ALDH7A1	1.12755	1.53863e-06
NECAB1	1.99539	1.55737e-06
LINC00842	3.10109	1.63964e-06
PPL	1.50136	1.67661e-06
TMEM132C	1.96537	1.70512e-06
PKP1	2.42182	1.72307e-06
PNMAL2	1.18647	1.73318e-06
ECEL1	3.57709	1.95463e-06
LYVE1	2.326	2.00219e-06
RGMA	1.74604	2.06996e-06
FAXDC2	1.3476	2.09381e-06
GPM6B	1.91192	2.09688e-06
CD36	2.19476	2.42492e-06
SLC25A27	2.31113	2.42658e-06
F10	1.65527	2.42665e-06
PDGFD	1.66498	2.69354e-06
ZNF204P	2.20056	2.76828e-06
ITM2A	2.11955	2.80242e-06
MYLK	1.48992	2.88442e-06
LIFR	1.67183	3.00049e-06
GRAMD3	1.35564	3.0069e-06
CPAMD8	2.00638	3.17451e-06
C2orf88	2.14188	3.51109e-06
CLDN11	1.94719	3.70452e-06
PLK5	2.39446	3.72526e-06
RP1-193H18.2	1.95913	3.78067e-06
ID4	1.84097	4.22583e-06
PTPN14	1.1113	4.31174e-06
ANGPTL4	1.63647	4.44259e-06
CASC8	3.59226	4.49217e-06
MYH11	2.08629	4.69992e-06
CDKN1C	1.49215	4.72936e-06
SPRY1	1.24184	4.75464e-06
METTL7A	1.13004	4.75726e-06
MAML2	1.45427	4.84658e-06
PRSS50	1.72354	4.89914e-06
NPR1	1.44646	5.04058e-06
RPL34	1.16791	5.17243e-06
KANK1	1.13603	5.26638e-06
GRIA4	2.75769	5.29702e-06
RHOJ	1.26065	5.30175e-06
ALS2CL	1.05976	5.30723e-06
MATN4	2.28076	5.37216e-06
DUSP9	3.0545	5.50807e-06
HAS3	2.04355	5.58078e-06
KCNC4	1.1625	5.74341e-06
TEPP	2.04138	5.77369e-06
NEURL3	2.36673	5.92469e-06
L3MBTL4	2.10779	6.11134e-06
CLDND2	1.46817	6.45438e-06
RBP7	1.92875	6.55216e-06
TMPRSS2	1.89675	6.64337e-06
MYO1H	2.18746	6.78962e-06
AQP5	3.41703	6.87956e-06
SERPINB5	1.88337	6.90893e-06
ALDH3A1	1.90365	6.9131e-06
ADCY5	1.32724	7.01239e-06
HIF3A	1.51993	7.24541e-06
KRT15	3.08154	7.38974e-06
CRIM1	1.25895	7.40301e-06
TPD52L1	1.32995	8.06877e-06
PPAP2B	1.45923	8.64095e-06
CLDN19	2.27363	8.82711e-06
AC097724.3	2.25362	8.90288e-06
TENM2	2.15507	8.92731e-06
RASL10A	2.04896	8.961e-06
PCDH18	1.66898	9.00873e-06
CSRP1	1.1978	9.24072e-06
CSN3	5.45321	9.3722e-06
SAA2	2.48946	9.39339e-06
AC074289.1	2.24751	9.8832e-06
LRRC38	3.35527	1.00099e-05
SORBS1	1.59101	1.00442e-05
COBL	1.5441	1.02824e-05
NAT8L	1.75402	1.05965e-05
CLDN8	2.2116	1.1409e-05
TNNT2	2.43425	1.16621e-05
LEP	3.65794	1.17166e-05
SOX9-AS1	2.40001	1.20092e-05
PM20D2	1.5883	1.21856e-05
SLC27A6	2.43938	1.22925e-05
RP11-299J3.8	1.23023	1.23481e-05
ADH1B	2.64534	1.27716e-05
EGFR	1.54061	1.28942e-05
TBC1D4	1.56318	1.28997e-05
PLA2R1	1.29182	1.31686e-05
YPEL4	1.25452	1.31914e-05
ADAMTS9-AS2	1.95366	1.35087e-05
PLIN4	2.78711	1.37687e-05
NTRK1	1.67685	1.37868e-05
LPL	2.80762	1.39977e-05
EGFLAM	1.54727	1.52102e-05
TFAP2C	1.80965	1.5351e-05
RP11-536O18.2	2.12921	1.54264e-05
FAM13A	1.16066	1.56934e-05
EPB41L4A-AS1	1.14463	1.59367e-05
C1QTNF4	1.29292	1.63295e-05
VWCE	1.52056	1.71551e-05
MAB21L1	1.88567	1.7532e-05
CXCL12	1.44958	1.7611e-05
RNF128	2.043	1.76304e-05
RGS9	1.68289	1.80813e-05
ARHGAP26	1.35415	1.87297e-05
IL17RD	1.68857	1.90048e-05
WDR59	0.896528	1.93875e-05
LRRN4CL	1.38365	1.94746e-05
SEMA6A	1.13652	1.95247e-05
PLEKHG4	1.22705	1.95461e-05
PDE9A	1.50938	2.02884e-05
ADIRF-AS1	1.34695	2.05477e-05
KLHL13	2.34682	2.08907e-05
CRABP1	2.88242	2.12993e-05
BEND5	1.23893	2.18917e-05
TCF7L1	1.14058	2.24949e-05
ECHDC2	0.898437	2.30329e-05
CDKN2C	1.10303	2.30398e-05
MAMDC2	1.68276	2.3299e-05
BARX2	1.85345	2.33043e-05
DIS3	0.880718	2.39608e-05
HRCT1	1.76501	2.40989e-05
PRCD	1.19647	2.41652e-05
KCNH3	1.40258	2.42803e-05
MYEOV	2.83576	2.43856e-05
KRT17	2.31919	2.53835e-05
EPHB1	1.5933	2.54071e-05
KIF26A	1.05496	2.57574e-05
LAMA1	1.74064	2.58718e-05
RASSF6	1.70485	2.61166e-05
GNE	1.51248	2.61184e-05
NOB1	0.83573	2.62913e-05
SCGB3A1	2.51504	2.6587e-05
NAV2	1.03834	2.69107e-05
MFGE8	1.2755	2.70533e-05
WIF1	3.00461	2.79508e-05
LAMB3	1.61175	2.85235e-05
SLC17A7	2.1488	2.85292e-05
FAM184A	2.16796	3.0848e-05
KLHL29	1.27336	3.09538e-05
ENOSF1	1.15738	3.11962e-05
FABP4	2.59146	3.15747e-05
TIMP4	1.72257	3.16232e-05
INTU	0.851069	3.26271e-05
AMIGO2	1.4327	3.29524e-05
B3GAT1	1.92753	3.4682e-05
NRTN	1.45287	3.52816e-05
TMEM130	1.6675	3.5372e-05
LCN2	2.55754	3.5499e-05
APOD	2.08445	3.65142e-05
IRS2	0.998241	3.77222e-05
CHRDL1	1.68042	3.82489e-05
EFNB3	2.04295	3.8388e-05
PYGB	1.00294	3.90919e-05
GSTM5	2.6448	3.91944e-05
ST13	0.951362	3.97511e-05
COLGALT2	1.59829	4.01911e-05
ATOH8	1.65518	4.11945e-05
APLN	1.84063	4.12965e-05
LIPE	2.2736	4.17626e-05
TCEAL7	1.67083	4.18401e-05
C19orf80	2.05836	4.22365e-05
RP11-332H18.4	0.963872	4.24882e-05
MAOA	2.77349	4.29036e-05
JADE1	0.930213	4.34027e-05
TMEM71	1.87253	4.44178e-05
SNHG8	1.00411	4.45059e-05
HAND2-AS1	1.47763	4.5282e-05
B3GALT5	1.78887	4.54916e-05
RPL9	1.52235	4.64473e-05
FXYD1	1.87968	4.66933e-05
SLC2A4	1.91895	4.78262e-05
SEMA6D	1.80251	4.81802e-05
SVEP1	1.37098	4.821e-05
BCL11A	1.63484	4.82441e-05
AMN	2.17441	4.86014e-05
AC104438.1	1.53815	4.8915e-05
RASIP1	0.845997	5.02457e-05
PLAGL1	1.37523	5.0445e-05
ITGA6	1.36462	5.06471e-05
FZD10-AS1	1.30889	5.24626e-05
KRT5	2.01248	5.27995e-05
ASIC1	1.39111	5.29179e-05
SMARCA2	1.16993	5.30069e-05
KLF15	1.7561	5.54355e-05
DENND2C	1.50402	5.77064e-05
TERC	1.80271	5.84744e-05
VLDLR	1.55819	5.93524e-05
PLXNA4	1.45985	5.94026e-05
PHLDA1	1.2641	5.94295e-05
NOVA1	1.39735	5.97133e-05
CDC42EP5	1.16598	6.01504e-05
CSRNP3	1.75773	6.41578e-05
PRSS12	2.00207	6.43837e-05
ALDH1A1	1.7988	6.54305e-05
KCNIP2	2.05725	6.55139e-05
SLC38A3	1.54638	6.59358e-05
STOX2	1.60494	6.62755e-05
ANKRD53	1.25069	6.66386e-05
NTRK2	1.93982	6.96176e-05
PLIN1	2.58434	6.96295e-05
CMTM7	1.09091	7.0079e-05
ZNF814	0.94886	7.17831e-05
ALPL	1.4416	7.22686e-05
GAREM	1.47198	7.35807e-05
ZCCHC11	0.913644	7.42985e-05
RP11-66B24.7	1.97333	7.45582e-05
TUSC5	2.69344	7.49401e-05
RP11-583M2.2	1.45947	7.52296e-05
MLXIPL	1.94936	7.54703e-05
OGFRL1	1.11761	7.77647e-05
IL1RL2	1.3905	7.78789e-05
WNK2	1.27128	7.83348e-05
RAB40B	0.6927	7.8575e-05
TGFBR3	1.32933	7.88069e-05
ETV4	1.544	7.90467e-05
RCAN1	1.22586	7.92449e-05
LINC00162	1.99867	8.02037e-05
BARX1	1.70702	8.07627e-05
SH3BGRL2	1.33596	8.10943e-05
ADORA1	1.80576	8.11287e-05
WDFY3-AS2	1.00961	8.24914e-05
RP11-513G19.1	1.40705	8.38117e-05
VSIG2	1.62531	8.52331e-05
EXTL1	1.64704	8.75869e-05
RPL32	0.9939	8.88572e-05
VIPR1	1.09144	8.93701e-05
AMT	0.985921	8.9874e-05
TCP11L2	1.24671	8.98989e-05
TSGA10	1.40377	9.1579e-05
HOXA3	1.09426	9.19565e-05
PRSS45	1.64273	9.45732e-05
PI16	1.77679	9.52107e-05
INSRR	1.53368	9.5252e-05
PNPLA7	1.24558	9.72952e-05
MYH7B	1.04518	9.81844e-05
MYRF	1.33651	9.86719e-05
LIMS2	0.915107	9.92001e-05
AC005152.3	2.4527	9.94973e-05
IGJ	2.21284	9.9556e-05
TMEM88	0.923369	0.000102345
G0S2	2.38656	0.000103632
CSTA	1.90076	0.000105047
ADM	1.67504	0.000105413
ASPA	1.60089	0.000105748
GPD1	2.48981	0.000107544
SMARCD3	0.854164	0.000111284
FGFR2	1.17912	0.00011173
MIR497HG	1.70331	0.0001126
AC078883.4	2.06337	0.00011263
GGT7	1.50757	0.000113228
RNF157	1.33941	0.000114163
AMOTL2	1.04717	0.000116176
PDLIM4	1.03939	0.000117657
PRNP	1.26263	0.000117941
KCNIP1	1.76889	0.000118212
ACSS2	1.05552	0.000121152
PADI2	1.69344	0.000122016
KCNQ4	1.63251	0.000122968
ALDH1L1	2.06014	0.000127193
ZC3H8	0.692639	0.000128483
PRR4	1.24636	0.000130374
NTN5	1.33275	0.000130388
GSN	0.817117	0.000130668
DUSP6	1.45011	0.000131324
NMT2	0.992588	0.000133895
NBEAL1	1.09249	0.00013441
GPR97	2.00836	0.000135958
RP11-627G23.1	2.2094	0.000136451
AC006116.20	1.63852	0.00013664
FTCD	1.33951	0.000137991
TERT	6.15547	0.000138057
RPL3P4	1.54337	0.000138338
ATL2	0.847164	0.000139891
CYB5R2	0.915267	0.000140034
NR2F1	1.45019	0.000143053
LAMA3	1.51182	0.000143441
GNG7	0.860066	0.00014363
GPX3	1.57879	0.000144648
ANXA3	1.49994	0.00014758
GRHL1	1.52248	0.000147774
THRB	1.18321	0.000155238
GFAP	2.50931	0.000158789
ALDH1A3	1.39171	0.000159075
PLLP	1.7421	0.000162438
ZNF677	1.08099	0.000167351
ADAM11	1.11942	0.000167917
XDH	1.92484	0.000168683
BOC	1.29467	0.000169287
COL17A1	1.96148	0.00017113
ADAT2	0.854071	0.000175664
NRIP2	1.38706	0.000175686
ABCA5	1.39714	0.000182942
KRT14	2.14344	0.000187985
KDR	1.21349	0.000188601
RP11-61A14.3	0.908504	0.00019148
RP11-613M10.6	1.30753	0.000192016
OFD1	0.919801	0.000197548
ANKRD35	1.16476	0.00020589
MYL7	3.07499	0.000207523
ARHGEF37	0.900073	0.000208523
SLPI	2.12893	0.000209525
ZNF711	1.72328	0.000219511
TMEM253	1.21034	0.000220329
TAC1	2.59293	0.000221729
AKAP12	1.36381	0.000222537
CTD-2350C19.1	0.990138	0.00022569
SYNM	1.93067	0.000228053
LYSMD4	0.997937	0.000228076
VPS51	0.966188	0.000229442
RSPO4	1.69729	0.000230633
PDGFRA	1.11477	0.000230786
NPY2R	3.34378	0.000242451
TRAF3IP2	0.782111	0.000245094
EBF1	1.37936	0.000247713
CIDEC	2.57907	0.000253484
RBMX	0.962906	0.000255122
PROX1	1.70858	0.000255511
MEST	1.34653	0.000260965
ICAM5	1.44022	0.000265801
PLCH2	1.00974	0.000268927
PCCA	0.741771	0.000269536
LZTS3	1.25682	0.000270812
AQP7	1.89693	0.000275782
SNHG14	0.964346	0.000276158
LINC00338	1.44782	0.000276778
EPHA2	1.03274	0.000282043
EFCAB4B	1.19631	0.000282121
AVPR2	1.09292	0.000283384
CHI3L2	1.53992	0.000283526
ACCS	0.951857	0.000284897
SYNPO2	1.22634	0.000285743
H3F3B	0.945765	0.00028806
CGNL1	1.22169	0.000293113
KRTDAP	1.44708	0.000301455
SATB1	0.925854	0.00031236
SLC16A8	1.26517	0.000313157
FGF23	2.29143	0.000316362
MOB3B	1.20356	0.000318577
PELI1	1.06846	0.000319177
ROBO3	1.06934	0.000323883
RPL13P2	1.30969	0.000326433
GAN	0.964144	0.000328212
TF	2.08973	0.000328219
KIAA1683	1.19674	0.000329029
PYROXD2	1.30666	0.000329705
PKP2	1.24665	0.000333136
MIA	2.26791	0.000333684
ARID5A	0.984579	0.000334214
PRIMA1	1.72341	0.000337315
NCALD	1.27294	0.000338355
RP6-99M1.2	2.22064	0.000338452
YBX3	0.873751	0.000338996
TRNP1	1.4136	0.000339779
ALOX15B	2.72343	0.00034254
CIDEA	2.61883	0.000344653
TINAGL1	1.21463	0.000348382
AC016735.2	1.88722	0.000350634
ARID5B	0.819559	0.000352474
SLC26A3	2.53281	0.000354046
SNX32	1.37259	0.000354165
RPUSD4	0.931789	0.000356044
LDHB	1.31336	0.000359635
ADAMTS8	1.73355	0.000365897
HSPB6	1.88482	0.0003683
GPAM	1.84862	0.000368794
SDPR	1.47953	0.000369323
TMCO4	0.695508	0.000370623
YIPF4	0.871092	0.000370835
ACACB	1.17466	0.000372688
GRIK5	1.23194	0.000379833
FABP7	2.3117	0.000384084
SOX15	1.22215	0.000388402
PWAR6	1.30112	0.000388995
SLIT3	0.946709	0.00039028
GPRASP1	1.35187	0.000391172
SLC4A11	1.3908	0.000392321
IGF1	1.55691	0.000392534
RBP4	2.61709	0.000403719
AC147651.3	1.47381	0.000408181
CNNM1	1.8347	0.000411125
RHOU	1.36979	0.000412277
AC124789.1	1.31868	0.000415943
ATP13A5	2.35614	0.000416053
TTLL10	1.13048	0.000422671
SLC3A1	1.32877	0.000424405
TAGLN	1.34309	0.000428161
TFCP2L1	1.55132	0.000429067
CITED1	2.33483	0.000431104
PID1	1.48606	0.000437487
KIAA1456	1.38983	0.000440365
NEURL2	0.909202	0.000440391
SLC25A30	1.09083	0.00044192
RPS27A	1.01977	0.000447267
GALNT16	1.13995	0.000448094
SCN2B	1.54389	0.000452791
CCNB1IP1	1.13875	0.000453304
HAPLN3	1.32447	0.00046544
INMT	1.11339	0.000468307
FAHD2A	1.03806	0.00047127
PTCH1	1.16171	0.000479048
C16orf89	1.51126	0.000479827
TANK	0.925999	0.000480408
ARHGEF28	1.19941	0.000481776
EIF3F	0.742062	0.000481938
FAM20A	1.17871	0.000484274
SASH1	0.872181	0.000489849
PEG3	1.33772	0.000490128
ADIPOQ	2.47474	0.000495877
SLC6A11	1.98635	0.000496151
GOLGA8A	1.88475	0.000501385
PTPRH	1.27345	0.000507681
MAPKBP1	0.637706	0.000507794
RPL22	0.806164	0.000510627
AF131215.9	1.04335	0.000521241
RPS12	0.821196	0.000522812
SOWAHC	1.1453	0.000524671
SRSF11	0.761683	0.000537922
CECR7	1.45343	0.000538893
TMEM220	1.17573	0.000548848
RASAL1	1.76129	0.000564224
MMRN1	1.58414	0.000564935
THRSP	1.99803	0.000579805
HOXD9	0.865076	0.000579897
KLK6	1.80462	0.000582187
RPS20	0.702786	0.000594064
CCDC8	0.960077	0.000599598
TMCC1-AS1	1.20204	0.000602933
LRFN5	1.6646	0.000606034
PROM1	1.67264	0.000610471
TFPI2	2.83934	0.000615254
RSPO3	1.79943	0.000620166
IL34	1.04718	0.000621211
SCARNA6	2.13913	0.000637979
CCR10	0.964013	0.000645196
MYOM1	1.1718	0.000646716
EMCN	0.989961	0.000650151
GPR124	1.44157	0.000651938
ARHGEF25	0.906352	0.000655159
TPM2	0.723026	0.000656574
RP11-489E7.4	1.33509	0.000656736
BAZ2B	0.958875	0.000657803
ZNF334	1.53186	0.000665426
MYC	1.09909	0.000665893
SLC6A14	2.06038	0.000666491
PEAR1	1.19118	0.000666678
SLMAP	0.933242	0.00066976
SLC7A10	1.34958	0.000678196
STX16	0.573336	0.000679284
NNAT	1.70497	0.00068011
ASTN1	1.67685	0.000684474
RND3	1.02902	0.000685061
RP11-88H9.2	1.24573	0.000689505
NACAD	1.00821	0.000697753
S100A1	1.59302	0.000700325
PTGDS	1.21985	0.000700636
ABHD5	0.842052	0.000708485
EPHB6	1.0049	0.000709432
POLR1E	0.970767	0.000723203
MAN2C1	0.699837	0.000726715
RP11-126L15.4	1.50159	0.000729231
STXBP1	0.709069	0.000729849
ZNF133	1.09036	0.000731346
AP001046.5	1.37401	0.000732174
CTD-3088G3.8	1.04347	0.000741894
GSDMB	1.39822	0.000745636
ZNF37BP	1.0374	0.000751431
RP11-113I24.1	2.64604	0.000753473
RNA5-8S5	1.99443	0.00075524
HBA1	2.25081	0.000758722
SLIT2	1.20202	0.000758738
SIK2	0.633344	0.00076414
RBM25	1.02209	0.000765598
ACVRL1	0.719838	0.000784078
KLK10	1.56241	0.000784591
PLP1	1.6978	0.000789541
RNF165	1.27771	0.000797408
MYH3	0.929245	0.00080248
DCP1A	0.563544	0.000825082
NACA	0.648336	0.000825173
GPRIN2	1.30641	0.00082571
CYP26A1	2.37462	0.000833388
ARGLU1	1.17633	0.000834764
HADH	0.747758	0.000839771
MRAS	0.91294	0.000840653
ZNF33B	0.841594	0.000852011
RNPC3	1.21298	0.000852924
FBXO9	0.867836	0.000867584
SLC19A3	2.25631	0.000883715
CYP11A1	1.10235	0.000891774
CYP46A1	0.931744	0.000895748
FAM211A-AS1	0.926002	0.000900278
GFRA2	1.00799	0.000908836
ETV5	1.13977	0.000912613
ST8SIA1	1.05231	0.000913717
XPC	0.646269	0.000922168
C11orf1	0.864391	0.000926674
ARHGAP36	3.56041	0.000933425
OSGIN1	1.24642	0.000940922
RP11-121M22.1	1.59041	0.000943683
ENPEP	1.54406	0.000955654
ETFDH	0.87059	0.000963299
FOXI1	1.89342	0.000983736
IRX2	1.01394	0.000984959
SLC34A2	1.62138	0.000985665
PRKAR1B	0.859883	0.000989557
ITGB8	1.1546	0.00099179
TMEM18	0.700296	0.00099385
CYP4F29P	1.77631	0.000999251
COLCA1	1.27715	0.00100017
CNTN1	1.22669	0.00100773
SOD3	1.23866	0.00101508
TNNT3	1.06159	0.0010173
MICAL3	0.926956	0.00102246
ZNF750	1.46489	0.00102501
GOLGA8B	1.23175	0.00102773
C3orf58	1.09338	0.00102842
TLE1	1.00962	0.00103926
HBA2	2.2001	0.00103996
WLS	0.85453	0.00104981
PPP1R12B	0.826301	0.00105653
MEG3	1.27022	0.00106643
GULP1	1.21816	0.00106841
AMBP	2.07269	0.00107281
CLIP4	1.29892	0.00107872
GALT	0.829805	0.0010803
TRIM36	1.77508	0.00108152
PIK3R1	0.691648	0.00108835
PPP1R1A	1.53975	0.00109788
ZNF502	0.923569	0.00113545
NT5DC3	0.953804	0.00114639
ANKS1A	0.750872	0.00115343
ENPP2	1.70818	0.00116108
PLSCR4	0.889519	0.00116869
PGAP1	1.01299	0.00116933
AOC3	1.18451	0.0011913
EGR2	1.72194	0.00119524
IFFO2	1.10825	0.00120044
KBTBD6	1.10632	0.00120339
BEND7	0.940504	0.00120709
EFNB2	1.09616	0.00120717
CA11	0.941665	0.0012088
CHKA	0.815036	0.00121252
ABCA8	1.09868	0.00121613
FOXC1	1.28905	0.00122315
CTA-14H9.5	1.09427	0.00122377
RPL26	0.789467	0.0012243
DGAT2	1.46628	0.00123079
POLG2	0.945378	0.00123407
AFP	2.44229	0.00123879
TCF15	1.21469	0.00125085
DAPK2	0.719782	0.0012725
NAB1	1.03223	0.00127871
RP11-61I13.3	1.42531	0.00128021
ALDH6A1	0.618464	0.00129887
TMEM192	0.494309	0.001313
PYGM	1.06417	0.00131621
ZNF471	1.22652	0.00133651
ATP1B2	1.00627	0.00134659
PPARG	1.35828	0.00134947
EGR1	1.50259	0.00135305
DHODH	0.770063	0.00136378
YY1	0.561245	0.00136716
LRP6	0.851399	0.00136799
PHYHIP	1.08055	0.00140436
ZSCAN31	0.9144	0.00142464
NFAT5	0.834262	0.00142607
PLEKHA4	0.752769	0.00143351
RIC3	1.21003	0.00144954
FAM217B	0.838715	0.00145802
SH3YL1	0.825089	0.0014628
LINC01071	1.30104	0.00147074
FAM46A	0.911241	0.00147429
DCLK1	1.30324	0.00147877
TNFRSF21	0.99545	0.0014951
RP11-21L23.2	0.940684	0.00149682
SDK2	1.16769	0.00149779
ANTXR2	0.932476	0.00150657
ARHGEF4	0.792672	0.00150989
EMILIN2	0.989155	0.00151266
C1orf115	0.740424	0.00151421
RP1-146I3.1	0.920334	0.00151822
FAM171A1	1.2345	0.00152133
FBXO24	1.11355	0.00154083
GCNT2	1.21693	0.00154323
MFAP3L	1.11165	0.00154438
ZC3H13	1.09644	0.00154903
DEFB124	2.06912	0.00154966
RPS9	0.865235	0.0015554
TGFA	1.62634	0.00155593
ARAP3	0.591158	0.00156051
SCARNA11	2.56352	0.00157058
DENND5B	0.825773	0.00158272
IGHA1	1.64847	0.00158476
RP11-349A22.5	0.807242	0.0016373
LEPR	1.45902	0.00163955
LPIN1	0.987382	0.00164859
PPARA	0.764727	0.00166019
NPHP3	0.676227	0.0016623
STAC2	1.86379	0.00166306
SHANK2	0.908272	0.00167968
AC004466.1	1.32096	0.00168775
TAPT1-AS1	0.957222	0.00169216
WASF3	0.969975	0.00170681
PNISR	0.917258	0.00170975
MAP2K6	0.972631	0.00172418
IL20RA	1.41931	0.00172565
TXNIP	0.923574	0.00173538
CORO2B	1.06318	0.00174143
HPS5	0.720719	0.00176438
SEC31B	0.968975	0.00177331
SNORA65	2.365	0.0017788
SORBS2	0.807768	0.00178137
MPPED2	1.26804	0.00178406
MIR205HG	1.15604	0.00179184
GDPD5	0.71995	0.00179417
MAF	0.706691	0.00179477
PCNX	0.851086	0.00181309
EVA1C	0.907611	0.0018178
MPPED1	1.57605	0.00184557
LRRC4B	1.13546	0.00185724
IGF2-AS	1.18069	0.00186016
KIAA1671	0.95115	0.0018783
RP11-295P9.3	0.865027	0.00187962
C4orf19	1.45851	0.00188781
GGTA1P	0.945532	0.00191171
NFIA	0.716617	0.00192102
RBM5	0.785902	0.00192191
FNBP4	0.733844	0.00193637
RP3-399J4.2	0.773792	0.00194386
CTD-2540B15.9	0.876157	0.00195923
LGR4	0.918905	0.00196562
GPRASP2	1.05781	0.00197198
DAB2IP	0.782116	0.00200024
DES	1.83356	0.00205298
RP11-166D19.1	1.06818	0.00206299
RP11-655M14.13	1.88481	0.00206944
RP11-706O15.1	1.06407	0.00206977
SPTBN1	0.67389	0.00207367
DNAJC18	0.672059	0.00208373
PMEL	1.40415	0.00209311
MLLT4	0.734639	0.00211414
CCDC152	0.955787	0.00212665
SLC28A3	1.92019	0.00213079
DIO3OS	1.0741	0.00215221
ME3	0.87392	0.00215697
PARD3-AS1	1.23282	0.00217247
CDC42EP2	0.59437	0.00219904
AC105020.1	0.877385	0.00219942
FGF1	1.02889	0.00220257
ANKRD29	0.850593	0.00220945
NGFR	1.0091	0.0022154
SIRPA	0.850343	0.00221549
GPX2	1.72051	0.00224896
CACHD1	1.34217	0.00226215
FAM126A	1.03735	0.00226465
NID1	1.00235	0.00229655
ZNF791	0.610359	0.00230857
GCLM	0.829076	0.00231763
CBX7	0.623218	0.00231931
CCNL1	0.941345	0.00232658
RP5-977B1.11	1.3155	0.00232733
EEF1B2	0.687891	0.00234653
RP4-635E18.8	1.33438	0.00235624
USP53	0.696805	0.00235992
RP11-31F15.2	1.3168	0.00237848
OVCH2	2.19666	0.00238532
TNS4	1.04413	0.00239361
KLK5	1.98302	0.00239908
FGF2	1.10765	0.00241209
RBMXL1	0.837441	0.00244782
SLC39A8	1.10659	0.00247059
APOA1	3.13763	0.00249002
CENPV	0.844606	0.00249621
LGALS12	1.91536	0.00251387
EFEMP1	1.1114	0.00254135
ARHGAP21	1.07948	0.00255667
MPHOSPH8	0.641578	0.00256023
SRSF8	0.552743	0.00258797
LMOD1	0.949698	0.00259581
RN7SL452P	1.32168	0.002618
CA3	1.96094	0.00262509
RP3-406A7.7	0.785519	0.00262685
JAG2	0.63677	0.00263403
MGST1	1.19327	0.00263531
MST1P2	1.15877	0.00264264
PTH1R	0.850722	0.00264442
FAR2P2	1.66114	0.00264854
DEFB1	1.60744	0.00265228
RUNX1T1	1.20905	0.00265483
CAV2	1.02114	0.00265718
MYSM1	0.894202	0.0026609
LDB2	1.2717	0.00268968
ADAMTS1	1.06959	0.00269393
PPFIA4	1.09045	0.00271025
GNAL	1.03614	0.00273624
CDK6	0.886879	0.00273625
RSBN1L	0.626474	0.00278886
HLF	1.01954	0.00282142
KLK7	1.71814	0.00282874
NRXN2	0.762528	0.00283662
PLCB1	1.06431	0.00284424
CLMP	0.847481	0.00285759
PERP	0.950474	0.00286016
LRAT	1.36904	0.00286308
ABI2	0.915753	0.00288067
ARL4A	1.0053	0.00289008
TSPYL2	0.801053	0.00289121
PRRG3	1.51316	0.00294487
IRS1	0.90813	0.0029473
COG3	0.617876	0.00295639
SMYD4	0.872502	0.00297828
HSPB2	1.00666	0.00299205
DDX6	1.11413	0.00302079
PODXL	0.678679	0.00305172
ZNRF3	0.74131	0.00305215
CDC14B	0.969802	0.00310185
SPARCL1	0.945513	0.00310988
SLC12A2	0.811536	0.00312603
PAN3	0.8536	0.00313291
PHGDH	1.36309	0.00316047
PLD1	0.87162	0.00319054
LIAS	0.770641	0.00319291
ADRB2	1.24538	0.00321881
AC022007.5	0.932682	0.00323869
GTF2IRD2B	1.15309	0.00324589
PNN	0.767065	0.00326804
SPG20	0.963151	0.00327408
GPATCH8	0.775918	0.00328277
AL132709.5	1.62869	0.00332929
COL7A1	0.620062	0.00335502
SHMT1	0.540366	0.00336582
ANPEP	1.14149	0.00338164
HGF	1.12523	0.00338277
ZNF160	0.53943	0.00339079
NACAP1	1.34098	0.00342748
INPP1	0.838754	0.003481
OXER1	0.974761	0.00350594
FAM110D	0.818002	0.00350683
CTD-2369P2.2	0.507658	0.0035243
NPAS3	1.03191	0.00355731
CMA1	1.45636	0.00355766
EGF	1.64144	0.00356495
SESN3	0.94109	0.00357363
SPIN4	0.949385	0.00361723
PTPRVP	1.01303	0.00362609
IGSF1	2.18519	0.00363471
UBE3D	0.904242	0.00366134
CDCA7L	1.09906	0.00369189
THRA	0.665247	0.00369522
RPL35	0.738268	0.00370235
PDE2A	0.932234	0.00371368
SCARNA2	1.28035	0.00374174
B3GNT3	1.61958	0.00376532
PALM2	1.13393	0.00381023
RBMS3	0.759358	0.00383962
INSR	0.574908	0.00384227
CYP4V2	0.791009	0.0038503
ARHGAP28	1.43469	0.00387401
TPT1	0.540955	0.00388314
SREK1	0.696026	0.00392642
TERF2IP	0.63606	0.0039362
ENHO	1.08873	0.00393932
RECK	0.688857	0.00394253
RPS18P12	0.636524	0.00400301
BEX2	1.00036	0.0040048
CPB1	2.91357	0.00403118
GYPC	0.671385	0.00403319
ITIH3	0.875751	0.00405225
PLK1S1	0.823067	0.0040575
DTNB	0.805143	0.00408331
MTMR10	0.804578	0.00411274
RNA5-8SP5	2.74039	0.004113
ARHGEF5	0.969937	0.00413504
LMBRD1	0.697794	0.00416307
RP11-558F24.4	1.09432	0.00420409
MCCC1	0.915409	0.00422669
FBXW7	0.593463	0.00424021
PTPN4	0.793193	0.00425766
PAIP2B	0.804842	0.00426145
MTURN	0.723619	0.00428176
GLRA3	3.12949	0.00431079
AKR1C2	1.47498	0.00433556
RICTOR	0.689886	0.00437421
CDC20P1	1.28904	0.00438883
RP4-717I23.3	0.995368	0.00441129
SLC25A3	0.966944	0.00441613
LPP	0.503499	0.00441696
HOXC-AS1	1.21062	0.00442118
MYBBP1A	0.678448	0.0044432
SMOC1	1.3026	0.00445295
ZNF542	0.721593	0.00445325
RP11-315O6.1	1.13726	0.00445861
AGPAT9	1.55607	0.00450451
SNORD17	1.35247	0.00452502
USP2	0.824477	0.00453191
ZNF600	0.690628	0.00453644
ROR1	1.00366	0.00454559
SIDT2	0.499688	0.00459344
HPGD	1.56728	0.00460441
RPL31	0.778224	0.00461645
TSPAN5	0.862463	0.00462177
RP4-778K6.1	0.963878	0.00462284
SCN3B	1.16058	0.00465237
CTSG	1.18843	0.00466208
TCEANC	0.906677	0.00466551
CC2D1A	0.610203	0.00470473
RP1-17K7.2	1.50156	0.00475079
WASF1	0.755969	0.00475163
NCL	0.720954	0.00475984
LRP2	1.27415	0.00477113
TRIM52	1.11196	0.00481306
BTBD3	1.07594	0.0048346
MMRN2	0.836789	0.00484255
KCNIP3	0.637898	0.00484602
RP11-531A24.5	1.12433	0.0048498
SVIL	0.838606	0.00485472
SFT2D2	0.6697	0.00485827
PTGER4	1.06457	0.00489109
IGFBP6	1.23852	0.00492212
RPL10	0.946834	0.00495772
SHE	0.882486	0.00497588
RNF38	0.804717	0.0049771
TLE2	0.650531	0.00498038
BCL6	0.852316	0.0049825
SNORA74B	1.50131	0.0050131
GATS	0.528015	0.00502257
CDK13	0.68535	0.00505961
LPHN2	0.987832	0.00506305
HTR2A	1.47275	0.00508627
RP11-467I17.1	1.17215	0.00509543
NR1H3	0.536229	0.00512302
SOCS2	0.918179	0.00512829
ALDH3A2	0.597524	0.00515099
VPS36	0.595342	0.00515159
UBAP1L	0.619308	0.00515407
LPAR3	1.58286	0.00516781
XXcos-LUCA11.4	0.70656	0.00520113
FOSL1	1.2945	0.00527538
LPP-AS2	1.12764	0.00531334
LETMD1	0.684579	0.0053201
KCNJ14	1.0751	0.00534253
SH2D3A	0.584095	0.00534548
PHACTR2	0.958946	0.0053935
MLYCD	0.774455	0.00553972
SNORA73B	1.69873	0.00554927
DHX33	0.534223	0.00555227
PRKCE	0.784034	0.00556324
TGM1	0.662695	0.00559402
MST1	0.661772	0.00561505
PCYOX1	0.593681	0.00562232
CLIP3	0.644953	0.0056373
LINC00667	0.658901	0.00564473
TLK2	0.764279	0.00566134
ZNF462	0.677197	0.00566274
RBBP8	1.08143	0.00567946
PI15	2.17422	0.00569105
EEPD1	0.719398	0.00573317
PNRC1	0.706683	0.00575783
HNRNPH1	0.832734	0.00576123
KAZN	0.548002	0.00577037
CTD-2363C16.1	1.6277	0.00577356
NISCH	0.425323	0.00583072
RSBN1	0.680164	0.00584474
SMAD9	0.927577	0.00587173
RBM26	0.771335	0.00591948
SCARNA18	1.11717	0.00595742
NTRK3	0.9767	0.00596649
MICU3	0.993607	0.00597763
RNU12	1.4657	0.0060003
KMT2A	0.563393	0.00601837
TPTEP1	0.904639	0.00603468
HOMER1	1.20556	0.00607459
HINT3	0.82314	0.00610594
SSBP2	0.67114	0.00612686
PAWR	0.672201	0.00612841
MIR29A	1.23681	0.0061876
IER5	0.85453	0.00619361
HARS	0.738873	0.00621186
RP11-529H20.6	1.40153	0.00626112
SOBP	0.793123	0.00626309
SCN4B	0.966182	0.00626386
WNT4	1.45193	0.00627232
METTL16	0.446889	0.00628846
AP001469.9	0.889002	0.00633985
GLTSCR1L	0.672404	0.00634851
RAPGEF3	0.722686	0.00635422
PNMAL1	1.40222	0.00635602
SH3BGR	0.872186	0.00637924
ABHD14B	0.625969	0.0064123
GIGYF2	0.631767	0.00643788
ZNF274	0.869823	0.00645654
NFIL3	1.22636	0.00646107
IGF2	1.11876	0.00646774
RPS10	0.699993	0.00647371
ZBTB44	1.04001	0.00649642
IRF2BPL	0.558149	0.00656238
RPL35P3	0.889521	0.00661363
CPED1	0.814478	0.00666437
RP11-817O13.6	0.604919	0.00673163
PKP4	0.642253	0.00680146
YAP1	0.596735	0.00681111
AMY2B	1.3319	0.00685266
RP11-130L8.2	0.769721	0.00695719
RPL31P11	0.977072	0.00696128
ALDH1A2	1.21568	0.00696273
SCARNA17	1.15777	0.00699997
ACTA2	1.14144	0.00710788
ZNF493	0.75113	0.00711965
FANCE	0.61383	0.00712609
PPM1N	1.00173	0.00713147
EDA	0.960354	0.00713636
SMARCC1	0.760496	0.00715854
FMO1	0.913398	0.00722863
CCNG1	0.894337	0.00727229
CMYA5	0.786591	0.00727487
CCRN4L	1.02352	0.00733717
MATN2	1.22324	0.00734016
BDKRB2	0.860946	0.00734344
ENTPD2	0.666706	0.00734516
SMAD3	0.519499	0.00739634
RNF122	0.730239	0.00741905
UBE4A	0.887276	0.00743038
EPHX2	0.80422	0.00743227
AACS	0.748067	0.00746777
SACS	1.14441	0.00748046
SLC24A1	0.652498	0.00749257
COL27A1	0.749625	0.00755885
ZDHHC8P1	0.917241	0.0075833
PTCD3	0.402646	0.00760239
C19orf57	0.852523	0.00762101
BAI1	0.935305	0.00762284
GATAD1	0.669648	0.00764076
JAM2	0.879337	0.007656
SENP6	0.846985	0.00767442
DPYSL2	0.750436	0.0076886
ARRB1	0.519094	0.00770066
RP11-252A24.7	0.726965	0.00773024
SCARNA9	1.03166	0.0078212
ECHDC1	0.739353	0.00784463
BRAF	0.829419	0.00784611
MRPL43	0.448769	0.0078526
EIF5	0.613983	0.00785569
COL9A3	1.03982	0.00790469
KIAA1045	0.950491	0.00791407
RNASE4	1.19587	0.00794118
ERCC5	0.547574	0.00794926
DYNC2H1	1.00734	0.00798151
TEAD1	0.808919	0.00798619
TOPORS	0.676422	0.007989
DSC2	0.890254	0.00800827
METAP2	0.544652	0.00801164
VSNL1	1.23042	0.00801275
PTRF	0.589487	0.00802164
SLC16A4	0.700566	0.00803061
ST8SIA2	1.38869	0.00804852
CALML5	2.08193	0.00809678
SYCE1L	1.0197	0.00819547
TRIM9	1.07429	0.00821009
TRMT11	1.03129	0.00824478
AC010970.2	1.95797	0.00825511
FAM43A	0.575994	0.00825701
ZFP36L2	0.875263	0.00828017
C1orf61	1.46414	0.00828244
LHB	1.02316	0.00829994
FGGY	0.891632	0.00831263
MAML3	0.880027	0.00832833
NBEA	0.939391	0.0083614
WDR60	0.821355	0.00849506
AADAT	0.944243	0.00851747
HS6ST2	1.31851	0.00857647
EXOSC2	0.605101	0.00863325
ETV1	0.79427	0.00863834
RP11-66N24.4	0.819251	0.00871717
AL592183.1	1.05659	0.00872153
RPS5	0.856529	0.00873901
ANAPC4	0.951188	0.00875293
EEF1A1	0.567059	0.00876128
RP11-181G12.2	0.790008	0.00879075
FBL	0.804058	0.00883165
TM4SF18	0.946684	0.00883303
CES4A	0.921104	0.00888282
ZNF561	0.725065	0.0088892
CFDP1	0.451792	0.00891365
ETV6	0.51648	0.00891548
RPL18	0.675938	0.00893969
SETD5-AS1	0.814221	0.0090188
BEGAIN	0.790426	0.00901898
PDE7B	1.11929	0.00906063
ZBTB16	1.42604	0.00908436
SPEG	0.623943	0.00911694
SDK1	0.7792	0.00914571
RP11-760H22.2	1.08612	0.00916389
MLTK	0.506658	0.00919704
THBD	1.01595	0.00921866
TMPRSS13	0.800691	0.00927394
WBSCR17	1.10978	0.00930038
SNORA11	1.70326	0.00936131
MARCO	1.12345	0.00939196
RPL12	0.940994	0.00940969
CACNA1A	0.49972	0.00945759
ZNF207	0.574591	0.00950132
CCDC14	0.864237	0.0095041
BIN1	0.65834	0.00952711
ADD3	0.800878	0.00952718
SRSF5	0.484772	0.00961864
FTX	1.31374	0.00970413
DICER1-AS1	0.579295	0.00983474
CIRBP	0.512938	0.00987143
CD248	0.686795	0.00988746
ZNHIT6	0.697306	0.00989629
AHNAK	0.53507	0.00991994
C17orf107	0.70027	0.00994318
MACROD2	1.1164	0.00996475
DLL1	0.985265	0.00996942
FAM107A	1.11213	0.00999075
HPS4	0.532973	0.0100045
MCC	0.564573	0.0100863
RP11-395B7.7	0.461564	0.0101777
ABLIM1	0.709804	0.0102077
PTPRG	0.594219	0.0102319
AKR1C3	0.988426	0.0102424
MT-TC	1.10017	0.010281
MKLN1	0.682039	0.010297
JPH4	0.88937	0.0103227
HIST1H4E	1.28236	0.0103611
ABT1	0.626421	0.0103818
CDC42EP4	0.712258	0.0104075
CYB5D2	0.495758	0.0104133
ERG	0.633048	0.0104217
SESN1	0.706619	0.0104506
RAPGEF2	0.834743	0.0104701
CD34	0.701429	0.0104741
ZFYVE21	0.530961	0.0104796
TSHZ3	0.731941	0.0104932
RPS23	0.572343	0.0105231
NIPAL3	0.476365	0.0105276
FGF7	1.02512	0.0105376
HEXIM1	0.463218	0.0105437
TMEM221	0.788653	0.0105662
SOX17	0.911169	0.0105982
RBPMS	0.485348	0.0106072
PHIP	0.658408	0.0106343
ZRANB2	0.65189	0.0106432
COL26A1	1.14818	0.0106627
CTD-2020K17.4	0.850889	0.0106638
SAMD4A	0.761102	0.0106785
HNMT	0.64355	0.0106811
ROCK2	0.584424	0.0107098
BACH2	0.742842	0.0107565
TTC28	0.715292	0.0108582
ISM1	0.806895	0.0108725
LINC01125	0.928618	0.0109005
ZNF614	0.892828	0.0109252
C20orf194	0.584323	0.0109705
HNRNPA1	0.741838	0.0109792
EMC1	0.430893	0.0110489
RNU4ATAC	1.92185	0.0110729
FRZB	0.811092	0.0110953
RPL24	0.568325	0.0111294
ADH5	0.471199	0.0111296
FLT1	0.686207	0.0111422
GK5	0.886172	0.0111862
TUBG2	0.780244	0.0111973
IRX6	1.29566	0.011213
TNNC1	1.11474	0.0112512
NFE2L2	0.527457	0.0113722
A2M	0.701906	0.0114448
SKIV2L2	0.708686	0.0114495
CTD-2562J17.7	0.789976	0.0114819
PRPF38B	0.738836	0.0114873
ANP32B	0.629657	0.0114938
AHDC1	0.487811	0.0115385
RPS13	0.675676	0.0115503
GCFC2	0.614833	0.0116128
AC079949.1	1.53733	0.0116717
ADAMTS9	1.19934	0.0116762
ZNF789	0.653647	0.0116775
RP11-51O6.1	0.974656	0.0116815
CCDC136	0.821692	0.0116968
C3orf17	0.58363	0.0117046
COG8	0.594465	0.0117147
PRPF38A	0.552774	0.0117223
CWF19L2	0.724263	0.0117284
TMEM59L	1.01856	0.0117632
CES3	1.50134	0.0118028
LYAR	0.520656	0.0118056
KIAA0020	0.593876	0.0118232
ANKRD17	0.572485	0.0118765
FXYD6	0.747894	0.0118848
N4BP2L1	0.617753	0.0118882
FAM124A	0.830678	0.0119026
UPF2	0.556969	0.0119982
CTD-2328D6.1	1.73627	0.0120656
ARID4A	0.621721	0.0121278
E2F6	0.820724	0.0121461
TMEM168	0.555449	0.0122079
REM1	0.800113	0.0122155
PER1	1.07743	0.0123009
FER1L5	1.16002	0.0123842
DAAM2	0.873855	0.0124024
MAP3K5	0.977527	0.0124072
CTB-152G17.6	1.17333	0.0124412
TTN-AS1	1.00216	0.0124461
SCARB1	0.53279	0.0125637
GHR	0.892956	0.0125725
ZMAT1	0.829349	0.0125957
ZFC3H1	0.786349	0.0126365
TBC1D15	0.710857	0.0126562
HSPB7	1.41332	0.0127547
TRIM68	0.93594	0.012761
SNORA53	1.45239	0.0128808
TENC1	0.570531	0.0128817
CREBZF	0.726472	0.0129189
ODC1	0.733184	0.012986
RPL13	0.896105	0.0129869
SNORA42	1.26	0.0130016
COX7A1	0.677884	0.0130342
PCBP4	0.542188	0.0130545
PELI2	0.697628	0.0130587
RPS2P5	0.952379	0.0131405
NOG	0.882207	0.0132407
EPB41L1	0.409249	0.0132413
MPP6	0.853371	0.0132427
RP3-402G11.25	0.781272	0.0132438
WDPCP	0.636074	0.0132767
PEX5	0.580736	0.013323
MBNL2	0.662555	0.0133586
ARL10	0.847124	0.0134776
CCDC102A	0.538255	0.0135407
PHLPP1	0.641296	0.0135683
CCDC84	0.66738	0.013569
EPC1	0.654661	0.013621
SLC27A1	0.666317	0.0136338
DSC3	1.25331	0.013637
ZNF518A	0.780738	0.0136477
ZNF662	1.00004	0.0136787
ARHGAP5	0.645523	0.0137822
SNTB1	0.890199	0.0137992
ADAM1A	0.812499	0.0138165
RBBP4	0.679116	0.0139074
ZNF277	0.560101	0.0139287
BDH2	0.763255	0.0139487
RP11-269F20.1	1.05611	0.0140154
CBLB	0.734538	0.0140455
ECI2	0.828753	0.0140477
PEBP4	1.06332	0.014095
CSF3	2.24744	0.0140959
ASS1	0.737213	0.0141011
PALMD	0.750054	0.0141354
AC105399.2	0.982426	0.0141496
RNA5-8SP6	1.32638	0.0141545
SUN1	0.658709	0.0141591
DENND4C	0.407859	0.0142106
RP11-339B21.13	0.79334	0.0142174
TRMT5	0.651765	0.0143177
CNKSR3	1.09099	0.0143211
OSER1-AS1	0.692983	0.0143462
SOX9	0.812301	0.0144197
DCDC2	1.36081	0.0145156
RP11-390E23.6	0.698389	0.0145281
DDX21	0.896986	0.014556
RP11-83A24.2	0.651913	0.0146969
PCNP	0.896639	0.0147133
TRA2B	0.522318	0.0147171
GABPB1-AS1	0.995039	0.0147512
LIPT1	0.794797	0.0148187
PLK2	0.953609	0.0148423
DCBLD2	0.619334	0.0149686
TUSC3	0.904121	0.0150747
2018-03-01	1.14272	0.0151314
RPL13P12	0.854712	0.0151428
RSF1	0.6957	0.0151624
PER2	0.798832	0.0151946
PLXDC1	0.652373	0.0152344
GAS5	0.749779	0.0153036
HNRNPD	0.405592	0.0153179
IQSEC3	0.682385	0.0153512
USP11	0.53308	0.0154362
RPL35P9	0.908669	0.0155237
RP11-18I14.10	0.587439	0.0155539
PDK4	1.12112	0.0155738
RIOK1	0.564095	0.015584
RP11-386I14.4	1.22995	0.0155859
PIP5KL1	0.718883	0.0156167
TMEM245	0.414378	0.0156432
ILF3-AS1	0.603344	0.0156556
ALG9	0.746994	0.0157272
RASL12	0.712545	0.0158143
C7orf61	0.903408	0.0158299
RHBDD1	0.578987	0.01585
EIF4B	0.589192	0.0158569
RNF145	0.737031	0.0159377
CAV1	1.04564	0.0159397
ADCY1	1.03839	0.0159473
MDN1	0.740744	0.0160192
ACAD8	0.598531	0.0160319
DCN	0.798873	0.0160846
EFHC1	0.657448	0.0161078
VCPKMT	0.866975	0.0161783
CALB2	1.17634	0.0161853
MYOC	1.77659	0.0162942
TEX10	0.697836	0.0163203
CEP44	0.87505	0.0163259
MOCS1	0.800048	0.0164077
RGL1	0.749717	0.0164488
TNN	0.864591	0.0164899
CHD9	0.470818	0.0165096
ANK3	0.776601	0.0166081
POLR1C	0.510964	0.0166148
IL33	0.913064	0.0166546
ZMYND15	0.508998	0.0166974
NMRK1	0.552923	0.0167877
AC074212.5	0.611987	0.0168849
CYR61	0.807695	0.0169133
MROH7	0.750016	0.0169178
WASF2	0.452642	0.0169417
CDC14A	0.913625	0.0169644
PLEKHB1	1.05466	0.0169838
CCDC82	0.852901	0.0170746
RADIL	0.740583	0.0171094
KAT2A	0.47197	0.0171517
WDFY2	0.580283	0.0172275
AMIGO1	0.845099	0.0172356
TPM1	0.729391	0.0172377
ZNF121	0.713006	0.0172887
ZNF551	0.714307	0.0173175
LAMB1	0.631376	0.017386
ECHDC3	0.633937	0.0173896
TBX15	0.898693	0.0174165
HBB	1.37998	0.017496
BTF3	0.58737	0.0175245
CEACAM1	0.623423	0.01753
MSLN	1.18068	0.0177294
ICA1L	0.669532	0.0177432
BCLAF1	0.614918	0.0177944
ATP1A2	1.36354	0.0177963
PTGS2	1.38518	0.0177992
CAT	0.918058	0.017868
CARF	0.788364	0.0178799
EEF1GP5	0.674485	0.0179082
AP000347.2	0.965074	0.0179791
ZBTB5	0.679848	0.0179848
MFN2	0.733028	0.018051
TRAM2-AS1	0.628408	0.0180717
RPL36	0.689038	0.018118
HEY1	0.765883	0.0181866
SPAG16	0.772788	0.0182366
TMEM150C	0.854219	0.0182564
C11orf54	0.522013	0.018264
IL6R	0.885074	0.018266
P2RX6	0.77458	0.018297
RIN1	0.568537	0.0183429
DHX15	0.737184	0.0183492
TBX18	0.858634	0.0184223
SOX7	0.781975	0.0184697
TM4SF1	0.833411	0.0184739
MT1M	1.09363	0.0184787
TRIM56	0.66578	0.0184921
CES2	0.483157	0.0186064
KIAA1549	0.618824	0.018626
TEF	0.6993	0.0187196
CD200	0.664802	0.0188262
GSTO2	0.55299	0.0188642
EIF3E	0.610844	0.0189412
CD320	0.458636	0.0189485
CHD6	0.570833	0.0189739
N4BP2L2	0.440863	0.0190147
VPS9D1-AS1	0.860608	0.0190412
LDHD	0.902307	0.0190421
SRRM1	0.679392	0.0190684
LINC00342	1.12948	0.0191006
C17orf51	0.598287	0.0192133
CAB39L	0.584209	0.0192182
NCOR1	0.748015	0.0192675
CCDC69	0.662506	0.0192984
FBXO17	0.624133	0.0193155
RPS19	0.696258	0.0193316
EXOC7	0.38598	0.0193327
MAEA	0.782044	0.019343
SETMAR	0.594996	0.0194751
DZANK1	0.784866	0.0194956
BEX4	0.780041	0.019503
AL928768.3	1.19167	0.0195586
ATP11A	0.703471	0.0195652
TSPAN6	0.71795	0.019611
RSRC2	0.581813	0.0196506
RIMKLB	0.742863	0.0197026
LA16c-OS12.2	0.611029	0.0197245
ZSCAN18	0.73708	0.0197854
IGLC7	1.75228	0.0197973
HEPACAM	0.996669	0.0198049
RP11-1002K11.1	1.19354	0.0198206
RP11-111M22.3	0.969429	0.0198489
AUH	0.55094	0.0199136
MSRA	0.421135	0.0199384
LYRM7	0.531443	0.0199589
LTBP4	0.775544	0.0199713
RP11-353H3.1	0.71115	0.019976
RP11-85G20.1	0.923365	0.0200087
RIMS3	0.705282	0.0200467
ZNF140	0.857445	0.020083
RN7SL2	1.48251	0.0201186
ZNF507	0.623934	0.0201354
RPS4XP6	0.804771	0.0201777
RP11-890B15.3	0.906311	0.0201987
CABP1	0.628485	0.0203222
TNS1	0.915493	0.0203234
HIC2	0.514243	0.0203817
UST	0.963403	0.0204418
Z83851.1	0.860703	0.0205821
FAM13B	0.705145	0.0205863
JAM3	0.677094	0.0206185
CHST3	0.653893	0.0206616
KLHL21	0.783801	0.0208442
CCL21	1.04087	0.020948
CLK4	0.821574	0.020967
NRBP2	0.559157	0.020997
CTB-43E15.4	1.16637	0.0210401
DMAP1	0.366709	0.0211357
COA5	0.598675	0.0213074
RP11-50E11.3	0.670843	0.0213142
MUC20	0.845695	0.0213681
MBIP	0.740611	0.0214406
CLHC1	0.772406	0.0215662
PROS1	0.772681	0.0215915
RP11-138A9.2	1.05254	0.0216167
TACR1	0.938714	0.0216847
SCG5	1.2073	0.0217504
SNORD8	1.65287	0.0217921
HAAO	0.691386	0.0218127
PPP1R12A	0.572997	0.0218389
SNRNP70	0.528536	0.0219059
SNHG1	0.885035	0.0219151
SCAI	0.665665	0.0219812
CTSF	0.67683	0.0219833
METAP1	0.724841	0.0220035
UBXN2A	0.459287	0.0220521
RPS3	0.737579	0.0220572
IGFN1	1.45419	0.0220693
TTLL4	0.406458	0.0220826
MYO18A	0.942444	0.0221497
C1orf116	0.85716	0.0222183
SH3KBP1	0.559543	0.0222299
ZNF10	0.893095	0.0222445
TSSC2	0.919755	0.0222451
CTD-2349P21.5	1.31623	0.0222671
ITGB4	0.619313	0.0222681
ANKMY2	0.759836	0.0222809
ZNF22	0.676887	0.0223243
ATP2B1	0.660604	0.0223799
HOXB-AS3	1.64125	0.0224483
C6orf223	2.28864	0.0225503
MEOX1	1.10591	0.0225516
SPATA6	0.476854	0.0225964
MT1L	0.764866	0.0225965
NR3C1	0.670551	0.022903
L3MBTL1	0.811882	0.0229946
TAB1	0.429131	0.0230089
MPDZ	0.757256	0.0230211
DNAJC7	0.779488	0.0231159
PCMTD2	0.670515	0.0231289
ARHGAP19	0.707435	0.0231603
EZH1	0.478869	0.0231963
SGCE	0.67057	0.023327
MAP1B	0.687515	0.0233379
ZBTB8A	0.463665	0.0233518
AOX1	0.872694	0.0233619
MPZL2	0.925184	0.0233943
PGM5	0.677906	0.0234009
BBOX1	1.17947	0.0234562
KIF12	1.12517	0.0235066
HPD	1.69638	0.0235225
MAN2A2	0.571685	0.0235232
KBTBD7	0.651747	0.0235375
LINC00641	0.840293	0.0236371
PURB	0.766519	0.023646
LINC00173	0.694533	0.0237061
SCARNA10	1.16745	0.0238475
POLR2J4	0.493127	0.0238594
FAM188B	0.467799	0.0238636
NT5E	0.928284	0.0238915
ZNF12	0.791581	0.0238989
CTNNAL1	0.900967	0.0239991
PSIP1	0.734867	0.0240233
OBSL1	0.480506	0.0241836
STEAP4	1.01583	0.0243397
RP11-923I11.6	0.916156	0.0243533
TMEM144	0.581287	0.0243809
RP11-430G17.3	0.675118	0.0244557
HIP1R	0.524795	0.0244623
KCNG1	0.949144	0.0244943
OTUD1	0.755218	0.0245034
ZNF784	0.445947	0.0245335
ZNF141	0.597106	0.0247075
COL15A1	0.648537	0.0248121
CEP57	0.563946	0.0248283
PAPLN	0.89339	0.0248318
OGT	0.569513	0.0248347
MYBPC1	1.7105	0.0249437
TRO	0.904843	0.0249578
PABPC4	0.597346	0.0249845
MEG9	0.926145	0.025017
LYNX1	0.68693	0.025017
JRKL	0.584951	0.0250487
HUNK	0.991358	0.0250832
GNB2L1	0.721272	0.0251301
C10orf10	0.883672	0.0251731
ITGA2B	0.744287	0.0251844
USP10	0.644179	0.0252219
DDX24	0.479987	0.0252659
TMEM237	0.676083	0.0252673
NPIPA1	0.932915	0.0253313
SON	0.546061	0.0253413
ESPNL	0.960582	0.0253754
CMTR2	0.735458	0.0253778
DTX1	0.669294	0.0254774
SMAD4	0.533127	0.0255035
KIF25	0.966265	0.0255068
CCAR1	0.447265	0.0255449
AKAP1	0.640113	0.0255817
EIF3J-AS1	0.68652	0.025598
RERE	0.413846	0.0257007
HERPUD1	0.702094	0.0259263
SLTM	0.685521	0.0259345
RP11-611L7.1	0.375883	0.0259831
MTCH1	0.493572	0.0260234
ACO1	0.535456	0.0261716
ART5	0.923097	0.0261859
SLC25A18	0.966591	0.0262341
C10orf118	0.468671	0.0263316
NKTR	0.682843	0.0263627
CDO1	0.979775	0.0263985
TSC22D1	0.601809	0.026481
PDE8A	0.722353	0.0265206
CTD-2086L14.1	0.873104	0.0265424
CTTNBP2	0.764851	0.0265908
TBRG1	0.492946	0.0266619
TACC1	0.473413	0.0267029
ACVR2A	0.731322	0.026768
TUBE1	0.710249	0.0267886
NR2F1-AS1	0.680612	0.026812
SLC14A1	0.905907	0.0268148
PAXIP1-AS1	0.696033	0.0268736
EIF3A	0.931992	0.0268772
EIF4A2	0.707777	0.0269799
MON2	0.665954	0.0271597
RP3-473L9.4	0.870571	0.0271716
C4orf32	0.58156	0.0271834
PDPR	0.702274	0.0271842
SNORA7B	1.45999	0.0272861
ZFAS1	0.480909	0.0272912
PTCH2	0.608046	0.0273448
CBX6	0.387564	0.0273944
DSG3	1.08248	0.027408
ZDBF2	0.670303	0.0274522
BBS2	0.835688	0.0274929
ZNF559	0.771791	0.027613
KLK2	1.92298	0.0276198
RPS28	1.15526	0.0276532
ICK	0.657791	0.0276912
TLE4	0.737138	0.0277141
C1orf226	0.660806	0.0277198
JRK	0.528126	0.0277308
FGFR1OP2	0.601847	0.0277365
AHI1	0.751968	0.0277486
LRPPRC	0.414984	0.0277501
AHSA2	0.782611	0.0277763
PRPF4B	0.498044	0.0277945
RP11-395I6.3	1.0346	0.0279315
ARHGEF10	0.596068	0.027935
SCARNA1	1.5673	0.0279964
TCTN3	0.698777	0.028002
PPARGC1B	0.74679	0.0280247
RP11-305K5.1	0.903747	0.028075
NSA2	0.594842	0.0281719
DERL2	0.649103	0.0281868
MTMR12	0.450754	0.0282275
ATP5F1	0.435375	0.0282376
NEIL1	0.493243	0.0282722
ATP5S	0.493939	0.0283825
SLC29A4	0.77716	0.0284179
TTC32	0.674155	0.0285045
SH3D19	0.756637	0.0285232
MMAB	0.558265	0.0286109
POU6F1	0.628492	0.0286371
BOD1L1	0.69569	0.0287217
PKN2	0.537007	0.0287281
FRA10AC1	0.615635	0.0288301
KRIT1	0.51261	0.0288502
FAM135A	0.799923	0.0288944
SPIDR	0.681268	0.0289413
GEMIN4	0.593954	0.0289519
TTC19	0.546292	0.0290538
DNAJC27	0.579599	0.0290726
EOGT	0.819661	0.029073
CLK1	0.761142	0.0291197
SCPEP1	0.663073	0.0291556
CFL2	0.657555	0.0292001
KPNA5	0.676012	0.0292617
SNCG	0.833912	0.0292799
PPP1R9A	0.666041	0.0292972
SCAF11	0.489044	0.0293068
CXCL1	1.44046	0.0293621
C17orf85	0.481486	0.0294074
MYCBP2	0.713217	0.0294401
snoU13	1.03273	0.0294845
ADCY3	0.64365	0.0294905
RP11-385F5.5	0.83567	0.0295174
TBC1D32	0.442816	0.0296971
SEC63	0.482918	0.0297372
C8orf58	0.546949	0.029747
RAD18	0.556486	0.0298467
RP1-20N2.6	1.43506	0.0299309
HFE	0.553501	0.0299331
TNFSF11	1.68022	0.0299415
RPL7A	0.549133	0.0300238
KLKB1	0.867992	0.0300904
MMP19	0.783793	0.0301273
VILL	0.423306	0.030155
AC005356.1	1.12249	0.0301813
TWIST2	0.831338	0.0302611
QRICH2	0.513336	0.0302827
GPR125	0.763394	0.0302973
ZNF385C	0.883443	0.0304677
CRISPLD1	0.814755	0.0306185
WDR27	0.452388	0.030648
HSP90B1	0.567627	0.0308457
SLC25A37	0.624434	0.0309191
RBM33	0.420736	0.0309194
KLK1	0.907602	0.0310289
FGFR1	0.483257	0.0310703
ZNF414	0.411223	0.0311567
HEBP2	0.38242	0.0313337
RP11-324E6.9	0.917321	0.0313514
THYN1	0.51103	0.0313603
VPS13A	0.573049	0.0314413
RPL18P11	0.730265	0.0314491
AK4	0.674755	0.0314835
MFI2	0.642937	0.0315204
KANSL3	0.559178	0.0316657
RBM6	0.53078	0.0318326
SLCO4A1	0.883763	0.0319629
MT1X	1.17583	0.0320216
TMTC1	0.779159	0.0320686
FAM49A	0.724256	0.0320786
CEBPZ-AS1	0.374834	0.0320843
MED23	0.695644	0.0321775
KLHL36	0.360594	0.0321809
RASSF3	0.629683	0.0322063
AC009948.5	0.637918	0.0322365
IL17RE	0.838898	0.0322414
TRAPPC2	0.654067	0.0323144
EHF	0.838811	0.0323789
ZADH2	0.342502	0.0324273
MLH3	0.410213	0.0324281
ZNF268	0.6763	0.0325371
LHFPL2	0.658266	0.0325505
TRMT10B	0.567495	0.0326757
EIF4A1	0.96119	0.0326784
RERGL	1.09079	0.0327224
IGHA2	2.24438	0.0327955
RNF112	0.734892	0.0328424
HAND2	0.787543	0.0329772
TMOD2	0.711602	0.0329814
IZUMO4	0.779892	0.0330305
BNIP2	0.669632	0.033129
HIST1H1E	1.08449	0.0332129
C15orf41	0.61219	0.0332531
AFF4	0.464746	0.0333335
HIBCH	0.731283	0.0334549
RNU2-59P	1.37161	0.0335194
SMURF2	0.388264	0.0335329
RNU1-88P	1.49958	0.0335596
SCN7A	0.779395	0.0337064
SLC45A4	0.516362	0.0338471
PART1	1.02875	0.0338592
KLHDC1	0.677987	0.0339366
SERINC5	0.761166	0.0340125
PDZD2	0.669677	0.0340131
CCND2	0.772836	0.0340277
INO80D	0.538504	0.034122
RMDN2	0.735127	0.0341552
RPL37AP1	0.774017	0.034166
PKD1L2	0.880236	0.0342406
ACSM1	1.42411	0.0342579
DUS3L	0.453621	0.0343441
LDOC1	0.429731	0.0344141
ZBED3	0.488411	0.0346048
NCOA7	0.890418	0.0346197
ZC4H2	0.594375	0.034678
LRRC19	0.87117	0.0347437
TSC1	0.484118	0.0347661
DDX26B	0.916175	0.0350147
IFT57	0.546311	0.0352028
CCDC71L	0.750624	0.0352935
RP13-516M14.1	0.591279	0.0353003
WT1-AS	0.980672	0.035316
U91328.19	0.589382	0.0353478
CHST2	0.62132	0.0353802
ZBTB38	0.497222	0.0353913
CTC-297N7.8	0.661752	0.0354248
HSD11B2	0.742089	0.0355097
FBXO32	0.691179	0.0355195
CMTM8	0.609623	0.0355546
CCDC34	0.592113	0.0356845
HS3ST1	0.636303	0.0356929
NRDE2	0.546843	0.0357599
RP11-234N17.1	0.786834	0.035908
RAD52	0.812704	0.0359637
RP5-874C20.3	0.791021	0.0361082
ZSCAN30	0.423043	0.0361251
SEC62	0.563522	0.0361489
TMEM52	0.697167	0.0361788
GARNL3	0.826105	0.0361986
SNUPN	0.451042	0.0362098
BOD1	0.642539	0.0362612
MID1	0.888481	0.0363627
C1orf213	0.643086	0.0364062
FAM212B	0.579569	0.0364097
CCL2	1.21907	0.0364108
RALGDS	0.507362	0.0364533
GTPBP8	1.05875	0.03647
RP1-39G22.7	0.537942	0.036538
PDS5B	0.51633	0.0365402
IFNGR1	0.647887	0.0366796
FLT4	0.555206	0.0368947
TRPC1	0.822474	0.036917
DOCK1	0.450589	0.0369895
PEX11A	0.586698	0.0369948
NFASC	0.545534	0.0370144
KIAA0368	0.576263	0.0372797
KCNK2	1.2645	0.0373094
DDX17	0.461812	0.0373145
RPL10P14	0.59321	0.0374006
RPS4X	0.653859	0.0374176
KIAA2026	0.755577	0.0375047
METAP1D	0.485921	0.037515
C12orf45	0.559552	0.0375355
CIB2	0.939994	0.0375485
SMARCA1	0.56202	0.037783
JAGN1	0.482319	0.0377943
SPAG9	0.609161	0.0378104
RP11-156E6.1	0.697075	0.0378887
TMX4	0.537314	0.0378969
RSL24D1	0.597055	0.0379536
CTB-176F20.3	1.49378	0.0379555
SMPD3	0.617929	0.0379639
LILRB5	0.795096	0.0379753
TTC17	0.547208	0.0380418
PUM1	0.628068	0.0380634
DTNA	0.678353	0.0381385
FAM132A	0.466758	0.0381605
PTBP2	0.626808	0.038226
NCOA1	0.365427	0.0382906
STAG3L5P-PVRIG2P-PILRB	0.695332	0.0383801
WSB1	0.597386	0.0384041
RP11-114H7.1	0.929642	0.0384294
MGAT3	0.782259	0.0384637
RPL36AL	0.485125	0.0385039
PNMA2	0.868902	0.0385163
RPL14	0.63377	0.0385374
ZNF276	0.569255	0.0386164
EIF1	0.433746	0.0386983
TYRO3	0.478756	0.038708
GCLC	0.668304	0.0388748
N4BP2	0.802496	0.0388874
SECISBP2L	0.495301	0.0388907
RP11-156P1.3	0.649946	0.0390794
AKAP9	0.528153	0.0391416
SUGT1	0.518628	0.0392101
SERPINA5	1.15513	0.0392981
MYO7B	0.902279	0.039313
DDX27	0.447531	0.039478
SMOC2	0.530518	0.0394948
ERO1LB	0.710937	0.0395311
ESD	0.619403	0.0395392
ZNF615	0.718256	0.0395954
AC007365.4	1.42139	0.0396445
TMEM8B	0.410134	0.0397515
KMT2E	0.544647	0.0397591
GYG2	0.96124	0.0397855
SENP7	0.608781	0.0398152
AC027612.6	0.67999	0.0398609
CDIP1	0.648699	0.0399232
DLC1	0.69916	0.0399505
EPB41L4A	0.543818	0.0399903
KDM3B	0.464892	0.0400274
RP11-333I13.1	0.779371	0.0400914
TIA1	0.618783	0.040103
NAA16	0.618159	0.0402299
WWTR1	0.569441	0.0403032
HDDC2	0.639596	0.0403291
RP11-385F5.4	0.60138	0.0404699
RGCC	0.641377	0.04057
AC008268.1	1.1302	0.0405995
ZNF773	0.851879	0.0406185
LINC00910	0.585535	0.0407032
RPL13AP3	0.79259	0.0407196
LONRF2	1.02181	0.0407565
CYP2J2	0.922427	0.0408456
GMNN	1.03212	0.04085
MSANTD2	0.779454	0.0409056
GREM2	0.909856	0.0410237
PTDSS1	0.397288	0.0410475
TMEM91	0.397522	0.0410564
HECTD1	0.698918	0.0410759
2018-09-10	0.495557	0.0413753
PRRT4	1.25794	0.0414255
CLASRP	0.531202	0.0414929
MPHOSPH6	0.538613	0.0415646
GNG11	0.720019	0.0415927
AC016586.1	1.08073	0.041632
RP11-1006G14.4	0.807539	0.0416748
SIK3	0.414509	0.0416856
UFL1	0.3509	0.0418062
SNORD3B-2	1.30877	0.0418138
2018-03-06	0.495496	0.0421389
ETF1	0.574043	0.0421649
LY75	0.742703	0.0421815
WASH2P	0.479957	0.0422916
GALNT3	0.817219	0.0423102
SGSM3	0.398754	0.0423495
PRSS21	0.947082	0.0423731
HYAL1	0.668359	0.042382
LPAR6	0.53664	0.0423961
PRKD3	0.590338	0.0424986
IQCA1	0.781948	0.0425326
EIF2A	0.540492	0.0425327
RP11-421F16.3	0.611717	0.0427799
POPDC2	0.710909	0.0427808
PCID2	0.537811	0.0427845
LCNL1	0.853381	0.0428663
ZFP90	0.544822	0.0428723
ZNF224	0.958468	0.0430353
PRSS16	0.738754	0.0431013
FITM1	0.488181	0.0431488
C10orf54	0.442736	0.0431583
EXOC1	0.599263	0.0431799
RP11-164P12.4	0.63574	0.0432298
F3	0.692342	0.0433215
SSBP3	0.371519	0.0434632
PIGA	0.669752	0.0436435
ATP5L	0.444302	0.0436461
CNOT1	0.480865	0.0436807
PJA2	0.452035	0.043797
PSME4	0.452239	0.043859
SAT2	0.445807	0.0439307
USPL1	0.739086	0.0440243
RP11-452L6.1	0.628102	0.0442459
RP11-469M7.1	0.866554	0.0442914
LTV1	0.729242	0.0443985
RP13-1032I1.7	0.486167	0.044427
TTC34	0.611264	0.0444444
TGFBR2	0.575835	0.0444505
DPH1	0.745187	0.044452
MXI1	0.869559	0.0444577
CLPX	0.611307	0.0446384
SLC41A1	0.516534	0.0446634
AC025335.1	0.687692	0.0446988
BICC1	0.748934	0.0448
CA8	0.888636	0.0449975
LUC7L3	0.618287	0.0450101
PAPSS1	0.43963	0.045187
MTHFD2L	0.455723	0.0452757
RPS4XP8	0.699476	0.0452882
RPL8P2	0.579561	0.0453311
ATP10D	0.616043	0.0453391
GAS7	0.456728	0.0453637
ENTPD1	0.481862	0.045406
ZNF292	0.640923	0.0455036
SECISBP2	0.472222	0.0455506
ARHGAP6	0.625255	0.0455516
TUBGCP6	0.322725	0.045653
MPZ	0.560142	0.0457374
DEK	0.562641	0.0457724
CTC-329H14.1	0.733096	0.045971
CD209	0.832888	0.0459849
CERS1	0.655635	0.0460818
FHL1	0.94725	0.0461659
RNU5B-1	1.49863	0.0461896
RP11-332H14.2	0.590034	0.0462766
PQBP1	0.456892	0.0463049
TTC22	0.706817	0.0464333
ZNF195	0.423315	0.0464412
NR2C2	0.634135	0.0465825
NFATC3	0.991005	0.0465898
CCNC	0.609483	0.0466016
GART	0.578963	0.0467425
JMJD1C	0.759373	0.0467799
FHIT	0.695427	0.0468842
HAP1	0.835001	0.0469341
ZCWPW1	0.464095	0.046955
RP11-302L19.3	0.685137	0.0470805
LARS	0.437987	0.0471627
GPBAR1	0.795072	0.0475544
CTCF	0.504977	0.0475753
CTD-3035D6.1	0.866175	0.0476798
WAC	0.47074	0.0477105
NLE1	0.463523	0.047763
INO80	0.52077	0.0477737
RP11-466C23.4	0.832722	0.0477796
RP5-827C21.1	0.504424	0.0478138
CLDN5	0.696004	0.0478225
NAP1L5	0.551514	0.0479829
NUDCD2	0.426449	0.0480898
RP11-216L13.19	0.445921	0.0483648
RAB11B-AS1	0.637615	0.0485205
SNHG5	0.518885	0.048725
ZBTB43	0.598431	0.0487744
RPGR	0.716109	0.0488153
USP49	0.633763	0.0488983
KCNN1	0.805043	0.0489542
RPS3A	0.575672	0.04896
EIF5AL1	0.683599	0.0490155
CRYGS	0.550874	0.0491204
ST3GAL3	0.35752	0.0491567
ASPRV1	0.598014	0.0492203
SHF	0.471938	0.0492382
RNU2-6P	1.28168	0.0492747
FER	0.574278	0.0492773
RFC1	0.602678	0.0492791
ABLIM3	0.525351	0.0493525
PAPD5	0.580449	0.0493963
TNFRSF8	0.67099	0.0494386
RP1-15D7.1	0.520556	0.0494659
LPHN3	1.00316	0.0495286
MAGI2-AS3	0.616343	0.0496727
TOMM20	0.389426	0.0496835
AC016831.7	1.17571	0.0497406
RPS14	0.569131	0.0497564
[truncated: 7 more rows]
