# Supplementary material for: Aligning the Aligners: Comparison of RNA Sequencing Data Alignment and Gene Expression Quantification Tools for Clinical Breast Cancer Research
Source: Preprints.org preprint supplement (doi:10.20944/preprints201903.0036.v1), 2019-03-04
Supplement: Supplementary file 3 [file Supplemental Table 3.xlsx]

## Sheet: STAR_DESeq2_up_Atypia_vs_Normal
Gene ID	log2FC (AvN)	p-value
CACNG6	4.03912	0.000127138
COL10A1	2.17676	0.000127138
SIDT1	1.38153	0.000127138
TMEM63C	1.45783	0.000127138
SCGB1B2P	2.7472	0.000184344
ARHGEF16	0.961165	0.000712147
PCSK4	1.18904	0.00103458
CABP4	1.47581	0.00125878
CACNG8	1.47	0.00125878
COL4A5	1.14416	0.00125878
DNASE1L2	1.24765	0.00125878
HPD	2.68377	0.00125878
KLHDC7A	2.12404	0.00125878
RHPN1	0.925436	0.00125878
RP11-120K24.5	1.63781	0.00125878
SIX1	1.87389	0.00125878
ABCC8	1.67801	0.00137913
PAX2	2.39921	0.0014417
CASP16	1.88485	0.00147708
EBF4	0.910957	0.00147708
INPP5J	1.21465	0.00155201
LAMA3	1.33545	0.00180537
IKBKB	0.575908	0.00211454
INPP4B	1.22024	0.00211454
AF131216.5	2.92585	0.0021216
AMZ1	2.25613	0.00255018
CRLF1	1.18378	0.00255018
EEF1A2	1.79156	0.00255018
ENG	0.582688	0.00255018
GNMT	1.65149	0.00255018
LIN7A	1.33704	0.00255018
LA16c-395F10.2	2.15057	0.00274239
KIF5C	1.17817	0.00322073
PSD4	0.741674	0.00326445
TRIM54	1.61831	0.00326445
AJAP1	1.30487	0.00359725
SLC4A8	1.37579	0.00359725
MAGI3	0.792208	0.00380345
ERP27	1.90787	0.00382082
S100A7	3.0661	0.00382082
ALDH4A1	0.879282	0.0039074
FAAH	0.889955	0.0039074
EMX1	2.70202	0.00439203
IFT122	0.783504	0.00470851
TMEM132A	1.17676	0.00477426
DNAAF3	1.26629	0.0049249
FSIP1	1.78088	0.00537968
CACNG4	1.47637	0.00542137
BATF	1.11347	0.00555323
RP11-54O7.3	1.34974	0.0057359
ACSF2	0.852752	0.00631793
CACNG1	2.03839	0.00631793
N4BP3	0.92861	0.00648675
NPW	1.59276	0.00670895
LDLRAD4	0.780702	0.00701063
FAM57B	2.31693	0.00738686
CTD-2555A7.2	1.1235	0.00769489
MYB	1.266	0.00769489
BAI1	1.11702	0.00919223
MLPH	0.951637	0.00919223
AMH	1.26596	0.00926881
TTC39A	1.13411	0.00965763
CAPN8	1.35299	0.0097691
FER1L5	1.43098	0.010071
RP11-156L14.1	2.2882	0.010071
CCDC183	0.697156	0.0107166
GGT1	1.10704	0.0112677
CPT1B	0.885636	0.0114449
DNAAF1	1.23589	0.0114449
PRTN3	1.84519	0.0114449
SYT9	1.8072	0.0114449
EPS8L1	0.751887	0.0121015
UCN	0.852179	0.0121015
SLC30A4	1.00466	0.0128322
NKX2-5	1.73271	0.0134989
CSDC2	0.924904	0.0136507
SYTL2	0.995218	0.0136507
LINC00617	2.31848	0.0139304
RHBG	1.3951	0.0143263
FAM153C	2.14271	0.0148846
SLC25A35	0.638882	0.0150668
MYO5B	0.843233	0.0153592
GPC1	0.583098	0.0154734
ENPP3	1.57245	0.0162589
PAQR6	1.08862	0.0163194
MCF2L2	2.01459	0.0163662
PLA2G4F	1.11715	0.0163662
ROGDI	0.749603	0.0163662
RP11-496I9.1	1.17483	0.0163662
SFXN5	0.833428	0.0163662
ZNF513	0.557779	0.0166116
PHKG2	0.576319	0.0167355
TMEM184A	0.803481	0.017298
DTX2	0.641852	0.0174708
GALNT6	1.07679	0.0174708
KIAA1244	0.817025	0.0174708
ZGLP1	0.652237	0.0180357
SULT2B1	1.07871	0.0182763
MEGF8	0.460003	0.0186588
DCD	1.20314	0.0191314
DRP2	2.7198	0.0191314
PRLR	0.800843	0.0194262
IQCH	2.15067	0.0194677
C2orf54	2.26903	0.0195242
CCDC24	0.721017	0.0195242
SCGB2B2	2.12936	0.0195979
TTC39C	0.671783	0.0195979
RP11-123K19.1	1.34107	0.0196795
C11orf35	0.82357	0.0204067
EDNRA	0.945597	0.02059
CACNA2D2	0.793962	0.0213308
NKD2	0.760402	0.0213308
C9orf152	0.9238	0.0220526
CTC-1337H24.1	1.01159	0.0220526
KCNJ11	1.03451	0.0220526
RP11-1260E13.1	2.2507	0.0220775
MYOZ1	1.76021	0.0223328
ESPN	0.975623	0.0229251
MASP2	1.49278	0.0236456
BIK	0.99744	0.0241077
RP5-1120P11.1	2.03873	0.0241077
KRT18P28	1.16837	0.0242207
SLC22A18	0.665628	0.0242207
SSTR1	1.25785	0.0242207
AGTRAP	0.655384	0.0243169
ANO9	0.73239	0.0243169
ARSG	0.788384	0.0243169
YJEFN3	0.796709	0.0243169
COL4A6	1.11496	0.0248272
RAB27B	0.951238	0.0248272
MSX2	0.979871	0.0251005
C19orf18	0.847292	0.0263066
SCUBE1	1.6446	0.0266957
CCDC159	0.537536	0.0268402
RP11-353N14.2	1.07175	0.0268402
GREB1	1.06497	0.0270479
SLC52A1	0.827618	0.0270479
ABCA12	1.76333	0.0275086
ABCC12	1.55913	0.0285568
CPA5	1.27108	0.0285568
FAM211B	0.62923	0.0285568
IGDCC3	1.579	0.0285568
KCNMA1	0.807658	0.0285568
RAMP1	0.972309	0.0285568
SHC2	0.707797	0.0285568
TRAK2	0.706897	0.0285568
TRIM36	1.37728	0.0285568
TTLL9	1.0063	0.0285568
EPN3	0.834101	0.0298285
DLX6-AS1	2.16669	0.0300808
C1QL1	1.33621	0.0303725
KIAA1257	1.29249	0.0303725
IFT140	0.68341	0.03106
ARHGAP32	0.584928	0.0314472
RP4-740C4.8	0.955019	0.0314472
ATP2C2	0.804809	0.0317515
NR2E3	1.30975	0.0317515
MEIS3	0.657189	0.0319646
SH3D21	0.79109	0.0322795
RP11-510J16.5	1.37093	0.0323561
RP11-465B22.3	0.97005	0.0325366
GATA3	0.940025	0.0329085
HMGN2P46	1.26206	0.0329085
LMX1B	0.829611	0.0329085
RN7SL521P	1.19373	0.0329085
ENTPD8	1.20795	0.033392
TMPRSS4	2.04342	0.0334035
HOTAIR	1.43957	0.0340099
JADE3	0.997195	0.0341825
LINC00940	1.37668	0.0341825
ZNF467	0.66869	0.0341825
SH3GLB2	0.650124	0.034192
CTNND2	1.23764	0.0343963
RABEP2	0.583325	0.0344076
BMP2K	1.13674	0.0344733
WBSCR28	2.44416	0.0344733
AC079776.3	2.19477	0.034892
CLSTN2	1.02905	0.034892
SLC26A6	0.617352	0.0350797
SEC14L2	0.995657	0.0350827
WI2-85898F10.1	1.68914	0.0353595
SYDE2	0.742285	0.0360401
ALOX15B	1.74323	0.036518
ATP1A4	1.72365	0.036518
MXD4	0.44582	0.036518
ST8SIA6-AS1	2.00787	0.036518
AC110619.2	1.31994	0.0366803
AKR7A3	1.16478	0.0368109
ASCL2	0.965609	0.0370033
MOV10L1	1.03287	0.0370478
SRC	0.495951	0.0370888
VN1R53P	1.28707	0.0374517
PAX9	1.19803	0.0375796
STX1B	0.592057	0.0391159
LRRC46	0.884598	0.0395518
REEP6	0.941374	0.0395811
PLCD4	0.977297	0.0399848
TMEM8A	0.434117	0.0401373
DNAH2	0.78493	0.04019
KCNK15	1.14148	0.0402402
RP11-279F6.3	1.30558	0.040351
NLRP13	2.33211	0.040609
GABRD	0.780351	0.0408465
FAR2P1	1.43617	0.0418123
PLXNB1	0.562524	0.0421578
PPEF1	2.54748	0.0422662
RP11-465B22.5	1.13335	0.0425739
TMEM79	0.677588	0.043054
RP11-398C13.6	1.44362	0.0431197
CSMD2	1.14986	0.0436708
TMTC4	0.727782	0.0446822
CLPSL1	1.19289	0.0453167
ARHGAP39	0.687933	0.0454724
DCT	1.74969	0.0454724
TMC5	0.976024	0.0456698
LINC00993	1.1729	0.045673
FCN2	1.34836	0.0457566
EPHA1	0.639001	0.0464859
IRF3	0.467034	0.0465488
ZSCAN1	1.13268	0.046747
PGM2L1	0.855365	0.0473885
AC003102.3	1.70436	0.0474652
WNK4	1.12763	0.0476082
INHBA	0.812122	0.0485301

## Sheet: STAR_EdgeR_up_Atypia_vs_Normal
Gene ID	log2FC (AvN)	p-value
TMEM63C	1.45252	3.4784e-07
AL161626.1	5.69457	3.67648e-07
SIDT1	1.36611	4.73442e-07
COL10A1	2.28701	8.81856e-07
ARHGEF16	0.952881	1.60442e-06
PCSK4	1.17814	4.7759e-06
RHPN1	0.915741	5.72866e-06
SCGB1B2P	2.70073	7.19318e-06
COL4A5	1.17074	9.61303e-06
DNASE1L2	1.23441	1.03159e-05
EBF4	0.884302	1.36755e-05
CABP4	1.44831	1.39725e-05
U3	2.52245	1.56755e-05
PAX2	2.31917	1.69227e-05
INPP5J	1.19703	1.84032e-05
RP11-120K24.5	1.56378	1.91863e-05
KLHDC7A	2.09904	2.24805e-05
SIX1	1.83755	2.3076e-05
HPD	2.57556	2.36042e-05
IKBKB	0.567792	2.37851e-05
LAMA3	1.34876	2.55e-05
PSD4	0.725479	2.62071e-05
INPP4B	1.2036	3.04176e-05
CASP16	1.9209	3.0861e-05
ABCC8	1.65417	3.21075e-05
LA16c-395F10.2	2.12915	3.42084e-05
ENG	0.569414	3.61221e-05
CRLF1	1.17842	4.03487e-05
FAAH	0.879197	4.62366e-05
IFT122	0.767792	4.70785e-05
KIF5C	1.18487	5.02812e-05
ALDH4A1	0.862202	5.11537e-05
LIN7A	1.36346	5.33045e-05
DNAAF3	1.29413	7.52149e-05
GNMT	1.66536	7.52187e-05
ACSF2	0.834828	8.24657e-05
TRIM54	1.5911	8.28873e-05
TMEM132A	1.16303	8.54669e-05
N4BP3	0.920137	8.56879e-05
BATF	1.10875	9.45258e-05
LDLRAD4	0.776697	9.58614e-05
SLC4A8	1.39814	9.86634e-05
ERP27	1.8616	0.000118702
EEF1A2	1.77958	0.000119794
RP11-54O7.3	1.38548	0.000123968
CTD-2555A7.2	1.07669	0.0001265
CCDC183	0.678145	0.000162263
MLPH	0.960057	0.000162459
TTC39A	1.1465	0.000164056
EPS8L1	0.737832	0.000172026
CACNG4	1.43969	0.000174115
MYB	1.2973	0.000184188
CPT1B	0.873425	0.000185588
MAGI3	0.853275	0.000189157
RP11-1260E13.1	2.21645	0.000198353
NKX2-5	1.75454	0.000212847
GGT1	1.09638	0.000220879
BAI1	1.0817	0.000224556
SLC25A35	0.623147	0.000232439
S100A7	3.05524	0.000232664
NPW	1.55514	0.000274658
AMH	1.22119	0.000278508
UCN	0.828587	0.000289554
SLC30A4	1.01741	0.000302805
ROGDI	0.738198	0.000309009
TMEM184A	0.797938	0.000310125
GPC1	0.574996	0.000326255
PHKG2	0.558917	0.000327233
SCGB2B2	2.11745	0.0003346
DNAAF1	1.20405	0.0003426
CAPN8	1.33498	0.000345637
ZNF513	0.53973	0.000349043
SYTL2	1.01725	0.000354532
DTX2	0.623857	0.000356192
KIAA1244	0.832652	0.000370475
SFXN5	0.816446	0.00038081
CACNG8	1.45561	0.000385513
CCDC24	0.700109	0.00039646
ZGLP1	0.620529	0.000398284
FER1L5	1.31905	0.000399055
MYO5B	0.854333	0.000403007
CSDC2	0.889897	0.000405316
RHBG	1.37773	0.000414556
PRLR	0.82453	0.000440961
PLA2G4F	1.09397	0.000454113
PAQR6	1.07643	0.000464598
AGTRAP	0.642514	0.000497852
C11orf35	0.814093	0.000508211
KCNJ11	1.05146	0.000520071
CACNA2D2	0.767077	0.000526608
MEGF8	0.447419	0.000526764
TTC39C	0.657453	0.000537941
GALNT6	1.06487	0.000549106
NKD2	0.756374	0.000568474
SLC22A18	0.659191	0.000571865
FAM211B	0.61388	0.00061909
RP11-496I9.1	1.11965	0.0006232
SULT2B1	1.04077	0.000633104
ESPN	0.972217	0.000645129
C9orf152	0.904991	0.000651282
BIK	0.993503	0.000652027
ARSG	0.775071	0.000678872
CCDC159	0.525681	0.000687959
ANO9	0.712945	0.000715101
EPN3	0.826717	0.000718507
SLC52A1	0.822714	0.000724812
EDNRA	0.956621	0.000728536
YJEFN3	0.77739	0.000739431
ARHGAP32	0.589655	0.000762208
RP11-123K19.1	1.31481	0.000798932
SHC2	0.703774	0.000801148
RAB27B	0.981261	0.000814139
TRAK2	0.688671	0.000820788
CTC-1337H24.1	0.958981	0.000838059
IFT140	0.660276	0.000858818
KCNMA1	0.790912	0.000894481
C19orf18	0.829558	0.000895859
SRC	0.480493	0.00094344
GREB1	1.08518	0.000954185
SH3D21	0.777437	0.000962026
IGDCC3	1.55214	0.000971408
MEIS3	0.642678	0.000991242
ZNF467	0.658921	0.00100407
RABEP2	0.569531	0.00102
ATP2C2	0.788974	0.00104095
RAMP1	0.967052	0.00105109
MSX2	0.976336	0.00106766
CPA5	1.23668	0.00108633
TTLL9	0.974839	0.00110124
COL4A6	1.1275	0.00110263
C2orf54	2.03083	0.0011558
SH3GLB2	0.632529	0.00118534
RP4-740C4.8	0.986599	0.00119772
TRIM36	1.34966	0.00119997
LMX1B	0.79432	0.00121645
GATA3	0.944993	0.00123821
MXD4	0.43401	0.00127086
ABCA12	1.71847	0.00127344
RP5-1120P11.1	1.90826	0.00131198
RP11-353N14.2	1.07803	0.00135888
SLC26A6	0.589265	0.00137651
TMEM8A	0.421051	0.00139699
HMGN2P46	1.26926	0.00142473
AKR7A3	1.23896	0.00143493
TMEM79	0.667347	0.00143937
ARHGAP39	0.678362	0.00146494
STX1B	0.569405	0.00151605
JADE3	1.02195	0.00154409
RP11-324D17.1	2.11447	0.00154528
ENTPD8	1.22013	0.00154641
DNAH2	0.753538	0.00154833
SCUBE1	1.60463	0.00155705
FAR2P1	1.48127	0.00155848
REEP6	0.937847	0.0015603
C1QL1	1.29215	0.00159353
HOTAIR	1.42998	0.00159826
CTNND2	1.2342	0.00161578
LRRC46	0.893443	0.00166209
CLSTN2	1.00909	0.00166487
PLXNB1	0.54509	0.00168077
SEC14L2	0.983633	0.00175709
TSPAN17	0.486488	0.00178453
ASCL2	0.937842	0.00182756
CLPSL1	1.24423	0.00188048
TMC5	1.02365	0.00188684
PLCD4	0.901283	0.00192249
PGM2L1	0.846881	0.00192904
AC110619.2	1.29609	0.00194275
GABRD	0.797638	0.00200996
INHBA	0.823183	0.00201711
IRF3	0.449255	0.0020394
EPHA1	0.60937	0.00210354
SHB	0.553117	0.0021423
ALOX15B	1.7372	0.0021821
DOPEY2	0.559503	0.00224361
RAB11FIP4	0.648319	0.00225846
MUC1	0.87465	0.00226566
RP11-465B22.5	1.08841	0.00231493
STXBP2	0.693436	0.00232135
KCNK15	1.11081	0.00233433
TTC21A	0.534979	0.00236494
PVRL2	0.621242	0.00239268
SAMD12	0.852468	0.00241031
ARRDC1	0.601456	0.00241469
MOV10L1	0.95443	0.00241752
EFCAB4A	0.650938	0.00242471
ZSCAN1	1.1275	0.00245563
SLC38A1	0.765877	0.00245995
RP11-465B22.3	1.01035	0.0024714
ASTN2	0.736585	0.00258467
CRTC1	0.4618	0.00258766
MMP17	0.693772	0.00259356
WNK4	1.12685	0.00262358
CLDN7	0.585153	0.00269158
CTXN1	0.990257	0.00269664
ATP1A4	1.57469	0.00274163
TNNI2	0.797785	0.00280827
ARSA	0.500074	0.00287309
TMTC4	0.695326	0.00291266
SYDE2	0.832044	0.00291988
LRBA	0.481373	0.00292227
CTD-2015H6.3	0.695727	0.00293476
FAM132A	0.566732	0.00293507
CAPG	0.710534	0.00300278
LINC00993	1.16906	0.00307072
TSTA3	0.566732	0.00315101
ERBB4	0.928741	0.00316386
CSMD2	1.09275	0.00320509
HDAC10	0.603767	0.00324063
STARD10	0.853547	0.00326788
FOXA1	0.832579	0.00340894
BNIPL	0.745193	0.00342566
SERPINA5	1.34446	0.00343743
HOXC-AS3	1.32306	0.00343817
CA12	0.842771	0.00351059
FAM83A	1.44076	0.00353106
CEP104	0.39651	0.00354633
FBXL19	0.51633	0.00354819
ATRN	0.4073	0.00357122
ABCD3	0.626356	0.00362217
CARD14	0.776324	0.00365473
FCN2	1.26258	0.003683
F7	1.18999	0.00370322
MEGF9	0.608606	0.00375162
C6orf223	2.0438	0.00380156
RHBDL1	0.682588	0.0038477
PROM2	0.539784	0.00388558
APOE	0.747643	0.00388603
MIR940	0.473687	0.00391613
REEP1	0.840843	0.00392516
BRI3BP	0.547993	0.00396919
ACRBP	0.61538	0.00405556
IFITM10	0.853113	0.00405838
FRS2	0.603591	0.00413675
TMEM91	0.472536	0.00417507
EREG	1.84573	0.00418424
DRAXIN	0.870669	0.00422261
SPATA33	0.552872	0.00423204
CST9	2.39634	0.00429989
PSCA	1.64746	0.00436848
VWA1	0.513838	0.00442799
ALDH3B2	1.21719	0.00445169
CTD-3193O13.9	0.750313	0.0044776
RP11-3M1.1	1.31856	0.00449991
AFF3	0.919685	0.00456347
MTL5	0.774866	0.00462317
GATS	0.443123	0.00463223
IGFALS	1.21859	0.00464233
TFAP2B	1.05296	0.00466058
GLA	1.38784	0.00466904
UCP2	0.684423	0.00473552
CAPN13	0.869501	0.00475309
PRRT3	0.599742	0.00479067
SULT1C2P1	1.81254	0.00480031
TMEM150C	0.841954	0.00482618
DNAH14	0.796093	0.00485455
C17orf62	0.391797	0.00490757
PVALB	1.81168	0.00493533
LRRC56	0.681239	0.00495125
RAB26	0.685146	0.00504164
RASL11B	0.980171	0.0050635
SLC52A2	0.407605	0.00521308
VSIG2	0.886306	0.00521586
EME2	0.564354	0.00524184
SLC9A3R1	0.820372	0.00528382
C2CD4A	1.64115	0.00532275
PODNL1	0.648101	0.00532709
PRX	0.431754	0.00535224
CYHR1	0.375167	0.00537654
FAM174B	0.708124	0.00539861
SLC26A1	0.885691	0.00541592
PNPLA6	0.427545	0.0054177
BCAM	0.766337	0.00542626
PLEKHG3	0.42646	0.00548648
RAPSN	0.876319	0.00553298
SFI1	0.453614	0.00557328
TJP3	0.691304	0.00557416
AZU1	1.24049	0.0055834
CTA-228A9.3	0.671517	0.00559837
ATP8A2	1.38098	0.00565074
GUCY2D	0.695566	0.00566041
CCDC170	0.77043	0.00567897
ARHGAP33	0.522524	0.00583556
SLC30A2	1.14203	0.00583785
ZMYND10	1.01358	0.00589252
G6PD	0.716052	0.00610516
RP11-324E6.9	0.94405	0.00613276
TMEM105	1.09083	0.00616998
SPDEF	0.762897	0.00617408
STC2	1.09942	0.00621177
CAP2	0.911064	0.00626546
CUL9	0.351145	0.00628275
ABCC3	0.798258	0.00634803
CTPS2	0.674369	0.00637889
STK11IP	0.411014	0.00640429
ZNF692	0.417073	0.00641469
C3orf14	0.682099	0.00644433
EVA1B	0.599801	0.0064671
C1orf159	0.423243	0.00646909
ADAP1	0.589307	0.00648013
HOXC13-AS	0.983409	0.00650009
WWC3	0.502612	0.00652215
PNMT	1.55523	0.00654365
SLC26A3	1.34858	0.00659679
AZI1	0.447453	0.0066644
WNT7B	0.846209	0.0066676
NPAS1	0.835046	0.00667198
CALML3	1.35554	0.00672504
GPR160	0.714528	0.0067608
PCSK1N	1.26333	0.00680938
EDN2	1.33877	0.00681885
SYT17	0.887477	0.00697477
AP1S3	0.80753	0.00698809
RP4-740C4.6	0.557748	0.00718497
ABCC12	1.54392	0.00720175
ZNF433	0.456486	0.00733645
TRIM62	0.56579	0.00745246
WNT4	1.13568	0.00745849
GLRA3	1.96479	0.00767266
EDARADD	0.819258	0.00777895
MBOAT7	0.502156	0.00782329
UBE2H	0.362494	0.00786203
SSPO	0.515915	0.00786374
AC005306.3	0.511139	0.00787209
NAPSA	0.60888	0.00790707
ACSM1	1.37811	0.00801189
HOXC11	1.13966	0.00802379
RP11-774O3.3	0.541484	0.00807191
TBC1D10A	0.342686	0.00808084
ERMP1	0.600274	0.00817144
HRASLS2	1.1303	0.00825546
RGS12	0.386727	0.00826684
RP11-634H22.1	0.716339	0.00832823
SNX22	0.866117	0.00833314
ABCA7	0.513382	0.00835567
ATP6AP1L	0.500869	0.00839403
ZNF680	0.57018	0.0083961
ULK4	0.68545	0.00840518
GAA	0.438732	0.00841061
LPHN3	1.08347	0.00843236
ARHGEF3	0.691334	0.00845669
TRMU	0.386015	0.00858409
CHST1	0.850724	0.00862011
MISP	1.08418	0.00871706
ASIC3	0.608652	0.00871886
ACADSB	0.774221	0.00878022
BAI2	0.834626	0.00906049
SPATA20	0.486214	0.0090646
TTC6	0.787753	0.0091069
UBXN11	0.559211	0.00917292
CALY	0.827551	0.00922579
TNNT1	1.62774	0.00929994
UVSSA	0.544336	0.00930124
GAK	0.326296	0.00933013
TMEM86A	0.821835	0.00948247
C1QTNF6	0.612185	0.00950427
ITGA3	0.520651	0.00957467
ARHGAP40	1.1213	0.00960663
TMEM26	1.06079	0.00961238
ATP2A1	0.664796	0.0096245
ADCK5	0.361518	0.00974128
PREX1	0.927807	0.00975088
TINCR	0.941793	0.00984051
CYP2B7P	1.5207	0.00994339
LAMP5	1.06793	0.00995081
PPP1R32	0.364062	0.00996416
ENPP5	0.715732	0.00999462
NINJ1	0.529197	0.0100909
LINC00160	1.02856	0.0101086
SYT8	0.873714	0.0101425
RP11-436H11.1	0.942016	0.0101539
CAPS	0.602795	0.0101881
ITPR1	0.59005	0.0103742
EVL	0.67896	0.0104194
DHCR24	0.717128	0.0104507
KLHL17	0.391379	0.0104887
FBP1	0.663283	0.0105071
GRM4	1.67864	0.0105294
HID1	0.605778	0.0106777
TRIB3	0.626773	0.0107544
SCCPDH	0.525656	0.0107804
NADSYN1	0.354123	0.0108026
GRAMD1A	0.393648	0.0108225
RP11-503N18.1	1.13414	0.010834
CST6	0.800189	0.0108387
CACFD1	0.492265	0.0109917
MMP11	1.11867	0.0109962
CIB1	0.5512	0.0110273
CDK10	0.3706	0.0111187
STRA6	0.774622	0.0111363
DENND6B	0.416659	0.0111414
GPX2	1.10757	0.0111936
TELO2	0.42421	0.0112651
RAB3B	1.41323	0.0114541
KDM4B	0.66644	0.0115453
TSPAN8	1.19344	0.0115515
CTD-2132N18.4	0.531634	0.0115702
PDDC1	0.324579	0.0115942
SHISA2	0.84294	0.0116187
RP11-253I19.3	0.862268	0.0116534
PGC	1.49936	0.0117285
IGSF1	1.39752	0.0117314
PAQR5	1.29218	0.0117369
IL11	0.673935	0.0119003
ISYNA1	0.463743	0.0119026
GMPPA	0.346572	0.0119062
VAV3	0.655529	0.0119193
DEGS2	0.861719	0.0119444
ECE1	0.548813	0.0121829
EFCAB12	0.864805	0.0121926
CAPN1	0.31746	0.0122741
KIAA1958	0.661214	0.0122996
SYT12	0.633575	0.0123947
SPTBN5	0.582001	0.0124386
SLAMF9	1.02355	0.0126065
INPPL1	0.311551	0.012629
CACNB3	0.513939	0.0126643
RAB11FIP3	0.354168	0.0126885
SLC9A5	0.48305	0.0128698
SUV420H2	0.428094	0.0128961
SEMA3F	0.48868	0.0128995
LCN12	0.744609	0.0129359
SLC27A4	0.474424	0.0130203
SDC1	0.49767	0.0130618
LAMB2	0.484158	0.0131193
C5orf30	0.7221	0.0131279
YIF1B	0.41587	0.0131471
ARTN	0.920793	0.0132823
ZDHHC24	0.443655	0.0133314
FTO	0.661638	0.0134816
RPL37AP8	2.08628	0.0134984
USP35	0.601694	0.0135139
COL9A2	0.729967	0.0135744
RP11-849F2.8	0.418609	0.0136854
RTN2	0.487173	0.0137098
CDYL2	0.762749	0.0137125
PEG10	1.06038	0.0140596
APEH	0.379334	0.014133
ZNF444	0.373338	0.0141833
ATP6V0B	0.438275	0.0142007
WNT5A	0.885718	0.014203
RP3-439F8.1	0.984541	0.0142396
SPPL2B	0.331952	0.0145225
DVL3	0.38723	0.0145453
MAGED2	0.588214	0.0145561
DMPK	0.514618	0.0146522
PEA15	0.480491	0.0147199
ACADS	0.507688	0.014773
CAB39L	0.50416	0.0149276
CXXC5	0.446503	0.0149328
UBE3C	0.29874	0.0149389
LINC00176	0.622445	0.0149529
PIDD	0.387481	0.0149687
NEDD4L	0.424339	0.014983
RTN4RL1	0.700306	0.0149879
SHISA4	0.459821	0.0149925
SEZ6L2	0.695633	0.0151504
CDK5	0.499215	0.0151647
MED25	0.455304	0.0151941
SC5D	0.519222	0.0152102
B4GALNT1	0.68867	0.0152667
EFCAB6	0.600464	0.015332
NEDD4	0.592204	0.0153583
DACH1	0.797141	0.0154039
MIR210HG	0.64119	0.0154589
MARCH9	0.307386	0.01549
RPH3AL	0.614003	0.0155678
POF1B	1.14817	0.015657
GATSL3	0.554759	0.0157918
GKAP1	0.762874	0.0159084
ZNF385A	0.642701	0.0159755
AC006116.20	0.771156	0.0160965
PRSS22	0.689526	0.0161937
KIAA1841	0.519864	0.0162131
FAM109A	0.367871	0.0162223
ATP13A1	0.359831	0.0164098
UQCC1	0.303443	0.0165467
FGD3	0.683849	0.016642
PPP1R26-AS1	0.736829	0.016751
KIF26B	1.04313	0.0169266
XBP1	0.69088	0.0169443
LAMA5	0.360036	0.0171707
FAM110A	0.552934	0.0172504
SOX12	0.395495	0.0172765
ELP2	0.511586	0.017389
AR	0.62089	0.0175098
NECAB3	0.452927	0.0175501
RPL18P13	1.22382	0.0177017
HES2	1.16028	0.0177374
DSCAM-AS1	2.08282	0.0178176
CHRNA10	0.530714	0.0178549
NARF	0.333795	0.0179381
TSPAN5	0.5787	0.0180505
ITGA11	0.717243	0.0182161
XXbac-B135H6.15	0.729442	0.0183224
POLN	0.496694	0.0183301
QRICH2	0.466241	0.0183527
PYDC1	1.73266	0.0184472
MGAT4A	0.648451	0.0184679
DYRK1B	0.401571	0.0184757
SLC43A1	0.543303	0.0185
KIAA1429	0.441683	0.018773
LRRC48	0.633208	0.0188155
B4GALNT3	0.73776	0.0188279
LINC01137	0.60401	0.0189581
HKR1	0.416277	0.0189826
RDH13	0.390555	0.0191179
DBNDD1	0.730828	0.0191281
MICAL1	0.370848	0.0192707
GIPR	0.706903	0.0195359
RP11-556O9.2	0.845583	0.0195614
CELSR1	0.616756	0.0196563
CCDC40	0.580674	0.0197363
IQCK	0.551503	0.0197904
ANKRD24	0.537949	0.0198983
PPP2R2C	1.2773	0.0199574
PRRG2	0.459557	0.0199662
E4F1	0.370163	0.0199755
APOL4	0.616405	0.0200443
CNTD2	1.17617	0.0201403
ABCB8	0.388933	0.0201957
EGLN3	0.68807	0.0202938
CCDC88C	0.556652	0.0203503
DUSP15	0.654074	0.0204234
RP11-445N20.3	0.573649	0.0204745
PDE6G	0.730815	0.0204775
RIMS4	0.730426	0.0204817
MORN3	0.770221	0.0205456
ARMC9	0.374079	0.0206116
CEP70	0.473472	0.0208235
TLE6	0.657325	0.0208795
ANKRD30A	1.24723	0.0209654
PPAPDC2	0.605168	0.0210864
ZDHHC11	0.710395	0.0212223
RHOH	0.712638	0.0213319
CLDN9	0.749513	0.0215538
KCND3	0.734333	0.0216305
P2RY2	0.675026	0.0216497
ARNT2	0.609078	0.0216649
FAM43B	0.808912	0.0217249
POMT2	0.386007	0.0217274
C6orf211	0.743001	0.0217639
FXR2	0.354909	0.0218299
INF2	0.370292	0.0218433
MYLPF	0.482472	0.0218666
RP3-329A5.8	0.594789	0.0219861
MAPK8IP3	0.365681	0.0219945
ASPSCR1	0.324908	0.0220567
GPRC5C	0.517916	0.0221458
TMPRSS6	1.25215	0.0222223
RANGAP1	0.373707	0.0223107
KRT81	1.18498	0.0225074
MST1R	0.487797	0.0225349
SH2D4A	0.670406	0.0229203
TEKT5	0.970671	0.0230373
PFKL	0.345764	0.0232593
BSPRY	0.566419	0.0232599
CYB561A3	0.599997	0.0232849
FAM131B	0.521079	0.0233442
SLC22A17	0.508458	0.0234555
AC079776.2	1.29163	0.0235165
ZFYVE19	0.334335	0.0235209
TOM1L2	0.469923	0.0235249
NEK8	0.4219	0.0235938
GLOD5	0.810113	0.023615
MICALL2	0.386681	0.0236415
TIMP1	0.463542	0.0237541
BCAS4	0.71321	0.023768
LCLAT1	0.597556	0.0237733
FAM155A	0.803971	0.0238148
SPOPL	0.571386	0.0238398
RHBDD2	0.410072	0.0238824
DNAJC9-AS1	0.788877	0.0239028
NRG2	0.664885	0.0241425
RHNO1	0.460054	0.0243109
VPS9D1	0.324002	0.0243525
TRIM3	0.606178	0.0243945
ASNA1	0.35657	0.0244948
RPS6KA1	0.383004	0.0246198
CROT	0.455768	0.0246232
RP11-216L13.19	0.424153	0.0246968
WASH3P	0.454204	0.0247373
PACSIN1	0.777781	0.0247948
AK8	0.615905	0.0248114
AC084018.1	0.469758	0.0248362
TUBGCP6	0.304607	0.0248403
TOPBP1	0.438821	0.0248579
LMTK3	0.620529	0.0249113
GPR137	0.338778	0.0250233
FANK1	0.652016	0.0250785
KCNC3	0.746251	0.0252589
SMPD1	0.352656	0.0254168
NBEAL2	0.35932	0.025461
RP11-368J21.3	0.72545	0.0255985
CBX4	0.479785	0.0256436
FMO5	0.743607	0.0257817
ACPL2	0.551962	0.0260026
TFAP2A-AS1	0.566428	0.0260228
ANAPC2	0.486696	0.0260787
KIAA1467	0.727241	0.02625
ZNF552	0.502436	0.0263325
PPM1H	0.51891	0.0264042
ANKRD13D	0.303793	0.0264426
ATP1A2	0.997906	0.0265428
FOXO6	0.533137	0.0265825
SBK1	0.64041	0.0265917
RP11-523H20.3	0.839379	0.0265993
ITGBL1	0.590917	0.0267325
ATP2A3	0.423013	0.0267558
LINC00505	1.00191	0.0267563
TTN	1.11658	0.0268055
RP11-382A20.2	0.602347	0.0268282
EFCC1	0.638523	0.0269571
TM6SF1	0.509186	0.0269616
TUBB3	0.812312	0.0271575
PIGQ	0.401458	0.0272456
PTPLAD1	0.528486	0.0274452
AGPAT5	0.468873	0.0275297
NKAIN1	1.23269	0.0276238
MNX1-AS2	1.18478	0.027681
TRPM4	0.382762	0.0276913
ENTPD5	0.771115	0.0278237
ACOX3	0.552801	0.0278417
VTCN1	0.742456	0.0278481
RNF43	0.667774	0.0280283
CASZ1	0.459649	0.0280682
NKD1	0.896947	0.0281241
ICAM5	0.65972	0.0281717
DPP9	0.322036	0.0284301
HDAC8	0.330574	0.0286675
CYP4B1	0.940626	0.0289985
TRIM41	0.331456	0.0291157
ANKS1B	0.531208	0.0292023
PLGRKT	0.551694	0.0292581
LRSAM1	0.354196	0.0293514
SHROOM1	0.689976	0.0293843
IQCD	0.652428	0.0294243
RBP1	0.852615	0.0294394
FAM83H	0.399157	0.0294662
PLA2G6	0.422976	0.0295487
TMEM241	0.519362	0.0296116
RP11-423H2.3	0.718527	0.029702
NUDT16L1	0.398316	0.0298302
TTLL5	0.432442	0.0299631
CCDC64	0.737331	0.0299959
RHOC	0.396781	0.030075
TMEM191A	0.533868	0.0301066
RP11-505K9.1	0.683289	0.0301569
TBC1D17	0.322299	0.030413
IL17B	0.767725	0.0305054
NRL	0.494195	0.030621
CTC-558O2.1	0.802143	0.0307866
FBXO41	0.361481	0.03086
CYP4F22	1.03248	0.0308623
LBP	1.40149	0.0308873
NPPA-AS1	0.519576	0.0311566
HAGHL	0.498203	0.0312512
CCDC157	0.444543	0.0312551
SDSL	0.470574	0.031396
C9orf37	0.330211	0.0314075
PLD3	0.316135	0.0316017
ANKDD1A	0.413487	0.031633
RAB17	0.467504	0.0317297
LINC00277	0.864419	0.0317868
GSTCD	0.567329	0.0318856
RP11-465B22.8	0.435144	0.0319851
NOX5	0.81939	0.0320447
RAB11FIP1	0.574415	0.0321278
CAMSAP3	0.449786	0.0321388
DLG5	0.623461	0.032315
PRR15L	0.556322	0.0323399
AIFM3	0.525216	0.0324121
SLC27A6	0.787216	0.0324137
ARFGAP1	0.314803	0.0324737
UPK3A	1.14659	0.0325988
ATP7B	0.695909	0.0326519
IFT81	0.566654	0.0328335
MATN3	0.891337	0.0330716
SPEF1	0.732897	0.0331606
VPS16	0.296178	0.0331996
GATA3-AS1	0.807132	0.033211
ZNF345	0.380951	0.0332276
LINC00504	0.811583	0.0335192
AC004461.4	1.81623	0.0338569
RP11-206M11.7	1.33936	0.0338657
CCDC154	0.358695	0.034105
MTA1	0.343679	0.0341575
DNM2	0.320381	0.0344757
ZNF341	0.268809	0.0346316
CYP2J2	0.763694	0.0346932
CHPT1	0.552369	0.034698
ABCC6	0.5824	0.0347134
CCNJL	0.48447	0.034734
CTD-2583A14.11	0.527423	0.0347415
AC005355.2	0.997054	0.0347678
KIAA0930	0.303159	0.0348348
CATSPERG	0.513601	0.0351917
CTA-217C2.1	0.410264	0.0353673
HTT	0.39539	0.0355474
CAMK2N1	0.64096	0.0356301
PPP1R26	0.423986	0.0356601
PDIA4	0.348702	0.0356902
ZNF668	0.368101	0.0356938
NPY2R	1.18351	0.0356969
ABCA2	0.36189	0.0358268
PHGR1	1.22343	0.0359602
MOV10	0.334847	0.0360531
ISLR2	0.430488	0.036139
RUNX1	0.447729	0.036462
AC090616.2	0.776438	0.0365251
DOC2A	0.839584	0.0365701
CSPG4	0.437963	0.0366454
TAF6L	0.384989	0.0368797
HDAC6	0.266119	0.0369103
DCXR	0.491777	0.0369449
TBC1D9	0.609097	0.0369839
KLK2	1.3936	0.037166
CNTROB	0.331142	0.0371788
EMC9	0.355756	0.0372013
FITM1	0.418964	0.0372635
COQ4	0.327827	0.0372881
CDH1	0.501915	0.0373198
RP11-19E11.1	0.850397	0.0373404
FAM221B	0.760702	0.0375169
TNNI3	1.22546	0.0375322
VIPR2	0.568643	0.0377844
MPDU1	0.349332	0.0379966
FASN	0.785227	0.0380607
MSMB	1.30462	0.0380842
ANKRD52	0.307732	0.0381786
SOGA2	0.697665	0.0382497
TSNAXIP1	0.391091	0.0383513
PTOV1	0.276888	0.0383778
TONSL	0.365247	0.0388349
GPR162	0.510384	0.0389878
LRRC23	0.394902	0.0390181
DLGAP1	0.817165	0.0390204
ANKRD22	0.752785	0.0392701
ZNF627	0.526743	0.039372
HOXC10	0.726017	0.0395782
AC008268.1	0.882462	0.0398191
RALGPS1	0.365704	0.0398513
ECHDC2	0.338945	0.0398876
SCUBE2	0.846415	0.0399865
DGCR8	0.334329	0.0402765
ZNF28	0.571175	0.0403414
TMEM110	0.421255	0.0403505
ST6GALNAC2	0.632318	0.0403702
AC132872.2	1.00102	0.04055
CATSPER1	0.695422	0.0408068
LONP2	0.354687	0.0408758
YIPF1	0.373364	0.0410786
SLC25A14	0.638182	0.0413203
SYTL1	0.388607	0.0413553
FGFR4	0.723589	0.041468
SHROOM2	0.512916	0.0415439
SIRT6	0.253453	0.0415892
CDK16	0.272488	0.0416759
PCYT1B	0.694755	0.0419553
FAM214A	0.481295	0.042101
C4orf48	0.429234	0.0422064
PAK4	0.43315	0.0423055
FSD1	0.697714	0.0423066
CUX1	0.367347	0.0424045
MOK	0.32162	0.0424552
JOSD2	0.363657	0.042611
SULT1A1	0.324303	0.0427039
SLC1A7	0.882884	0.0427709
CNFN	0.565	0.0427798
MEF2BNB	0.26988	0.0427908
USP43	0.579785	0.0428009
NAA60	0.358087	0.0428811
GEMIN7	0.314448	0.0429225
NOXA1	0.405316	0.04302
AK9	0.66243	0.0432393
PRKAA2	0.553576	0.0432671
CCNF	0.435771	0.0433558
HES4	0.301252	0.0434546
ZBTB48	0.280192	0.0434622
NKX6-1	0.73421	0.0435116
RP11-1042B17.1	1.85876	0.0436001
SIGIRR	0.336859	0.0436007
PLEKHF2	0.559019	0.0436903
OSBPL7	0.303967	0.0438564
STK32B	0.630394	0.0443064
ARHGAP36	1.32401	0.0443406
GPS1	0.289119	0.0446582
ETNK2	0.687132	0.0447109
LAMP1	0.283461	0.0447369
PRKCI	0.556353	0.0447534
HS3ST6	0.790998	0.0447945
FADS2	0.777073	0.0449798
CCDC78	0.631869	0.0450302
MN1	0.585253	0.0452639
DUSP10	0.528393	0.0452666
SERTAD4	0.538677	0.0459653
PPP2R4	0.381852	0.0461526
MADD	0.323019	0.0464304
CERS4	0.455254	0.0464585
NME3	0.328488	0.0466394
SULT1A2	0.66667	0.0466942
CHPF	0.333197	0.0467125
EXD3	0.36792	0.0467604
NARFL	0.322433	0.0470359
U73166.2	0.492673	0.0471369
NOS1AP	0.663284	0.0472571
NRIP3	0.791588	0.0473378
CACNA1F	0.621711	0.0473398
GSE1	0.328227	0.0476237
SLC7A11	0.780406	0.0476583
ENO4	0.536452	0.0477635
AFMID	0.435482	0.0479777
ZNF587	0.384059	0.0480165
PRR15	0.622444	0.0481802
CHKB	0.342308	0.0483718
ACOT2	0.355989	0.0484039
SYNE4	0.394487	0.0487081
WFDC2	0.867028	0.0488505
ATP13A2	0.356609	0.0489691
GRP	0.874352	0.0490063
PDE8B	0.71658	0.0491418
DIS3L2	0.320888	0.0493669
DFNB31	0.482624	0.0493762
ZNF561	0.442118	0.0494286
GSDMD	0.292237	0.0494802
IRX5	0.464585	0.0494929
CASD1	0.559904	0.0496564
CELF4	0.573401	0.0499378

## Sheet: STAR_DESeq2_up_DCIS_vs_Normal
Gene ID	log2FC (DvN)	p-value
S100A7	7.71298	9.89674e-13
EPHA8	6.11175	2.27133e-06
C2orf54	6.00079	2.80078e-11
PADI3	5.93922	0.00026685
DSCAM-AS1	5.93174	0.000180346
ABCC12	4.89083	0.0211775
MYO3B	4.64952	4.75853e-07
FABP6	4.50975	0.000157287
CLEC3A	4.47868	0.0182606
DHRS2	4.26556	0.000381208
ST8SIA6-AS1	4.16587	6.1546e-06
GRM4	4.15308	8.1997e-06
NKAIN1	4.09665	2.95236e-06
WBSCR28	4.05723	0.000113264
NEU4	4.02619	9.59447e-06
RP11-324D17.1	3.8718	0.00131878
HOXB13	3.84978	0.0218409
CEACAM6	3.82923	1.6248e-05
SYT13	3.7642	0.00105032
CD177	3.71903	0.019481
RRM2	3.70279	1.02281e-07
ISG15	3.67242	2.54083e-15
CST9	3.64783	0.0439029
AC110619.2	3.63523	5.66647e-10
PYDC1	3.62283	0.00227526
IFI6	3.60566	1.06572e-12
AC124944.5	3.60335	0.007867
SOX11	3.58427	6.25253e-07
GLYATL2	3.53831	0.000730818
CACNG8	3.49121	0.0127048
SULT1C2P1	3.49082	0.00330957
MSMB	3.482	0.000636153
CLCA2	3.48059	0.00136936
SLC25A48	3.47258	9.28442e-05
CNTNAP2	3.40751	3.44659e-05
PAX2	3.38697	3.58354e-05
COL10A1	3.35545	2.85092e-08
TMPRSS6	3.35215	5.43056e-05
RP11-663N22.1	3.34986	1.81907e-05
CTD-2315E11.1	3.32762	0.00184287
RP11-429J17.5	3.20389	0.00060824
SLC27A2	3.17803	0.00280789
RP1-34B20.4	3.14259	8.81013e-05
CDHR3	3.064	1.18117e-05
ERBB2	3.0353	3.5609e-11
RP11-206M11.7	3.02216	0.0173343
KMO	3.016	0.000168517
AC132872.2	3.01085	3.13007e-05
FSIP1	3.0094	2.5893e-06
RP1-212P9.2	3.00938	0.0122014
BEX1	3.0019	0.00229338
KIF1A	2.96913	0.00246375
CTB-58E17.5	2.96409	0.000113264
TMPRSS4	2.9621	0.00260723
PGLYRP2	2.94526	0.00169731
DIO1	2.94267	0.00356321
WI2-85898F10.1	2.94148	9.23613e-05
SLC6A4	2.92946	0.0143843
ROBO2	2.92616	0.00193228
AL391421.1	2.92441	0.000950358
TIGIT	2.91954	0.000131378
AF131216.5	2.91596	0.00580991
RP11-783K16.5	2.91413	6.14592e-09
RP11-141M3.5	2.90708	2.36596e-05
IGHE	2.9026	0.00924086
RAB6C-AS1	2.90103	0.000716263
RP11-3M1.1	2.89615	1.7071e-05
DPY19L2P4	2.88483	0.0145863
CTB-33O18.1	2.87489	0.000659342
PPEF1	2.87345	0.0258821
EEF1A2	2.85057	1.14853e-05
KCNF1	2.83645	0.00236315
SDR16C5	2.83029	3.61043e-06
ABCA12	2.82891	0.000428094
HIST1H2AI	2.82678	0.0066933
MMP11	2.82212	4.58188e-05
DRP2	2.81879	0.0117427
CNTD2	2.81313	0.000513639
RP11-65J21.1	2.8129	0.000337277
IGFL1	2.81287	0.00563446
LINC01088	2.77474	0.00515405
OASL	2.77225	3.00922e-08
CACNG1	2.75748	0.000180346
KYNU	2.74739	0.000951737
RP11-115D7.3	2.74573	0.0112728
FUT7	2.74415	1.44123e-05
RASGRF1	2.72873	0.000449269
PNMT	2.72538	0.00222545
OLR1	2.70586	0.000343977
EMX1	2.70422	0.00787137
LA16c-380H5.4	2.69808	0.000528676
AC079776.3	2.68538	0.0108101
CXCL9	2.66235	0.00223445
CLIC3	2.65528	1.17244e-07
IGHG2	2.63823	0.0023996
OAS2	2.61871	2.32348e-07
CRIP1	2.6174	6.98198e-08
CCDC74A	2.60778	0.00233485
PSCA	2.59583	0.00154697
TNNT1	2.56982	0.0123833
FAM153C	2.55695	0.00361343
GJB2	2.54539	0.00198064
LAMP3	2.52178	0.00536731
ASCL2	2.51706	1.40064e-08
CYP2B7P	2.51196	0.00879743
PPP2R2C	2.51068	0.0027992
IL24	2.49972	1.04571e-05
GABRD	2.48899	9.89674e-13
CEP55	2.45011	0.0124725
KLHDC7A	2.44721	0.000886278
CHRDL2	2.44218	0.000175311
ALDH3B2	2.43424	0.000180346
PTCRA	2.42698	0.0105929
SRPK3	2.42512	2.08834e-05
CST2	2.40531	0.0166782
ATP8A2	2.38484	0.0025326
FADS2	2.38311	8.58438e-05
LRFN2	2.37409	0.000910786
ELFN2	2.35824	0.00518676
AKR7A3	2.35299	3.08003e-05
CAPSL	2.34993	0.0233985
SPAG17	2.34181	0.0086482
FAM129C	2.31376	0.00619917
MX1	2.3062	1.13994e-05
C9orf169	2.30484	1.32203e-07
CCDC64	2.29798	7.42629e-06
MYT1	2.2942	0.00446847
RP11-117D22.2	2.28775	0.00347872
KCNK15	2.28746	4.31878e-05
MS4A1	2.28413	0.0469657
IFI27	2.28308	5.88388e-06
CHST1	2.28252	2.5893e-06
TNRC18P1	2.28163	0.00230957
SPOCD1	2.25379	0.000108025
HES2	2.25272	0.00317359
BPIFB1	2.24992	0.0054969
CMPK2	2.24533	0.00032305
SPINK8	2.24346	0.00521031
AC017002.1	2.23484	0.0144096
TUBB3	2.2346	0.000102654
GPRIN1	2.22998	0.000350464
LINC00940	2.22723	0.000371806
TINCR	2.22624	8.41582e-05
TSPAN1	2.22491	0.000749969
ERP27	2.2226	0.00227526
MIEN1	2.22186	3.16982e-05
DCD	2.22096	0.00208166
IGSF1	2.21021	0.0315974
KB-1592A4.15	2.20404	0.0300903
BRINP2	2.20084	0.0155788
CST6	2.19977	5.88388e-06
GLYATL1	2.18537	0.0086482
RNF224	2.1843	0.00343534
AC093642.3	2.176	0.000230075
C20orf201	2.17252	0.000184119
BUB1	2.17071	0.0250167
ARRDC5	2.1686	0.00130084
AMZ1	2.1679	0.00830519
AC003102.3	2.16545	0.00280789
TMEM86A	2.16463	1.01911e-05
HRASLS2	2.16051	0.00117945
RP11-416N2.4	2.15898	0.0017946
GLA	2.15606	0.00603856
TMEM52B	2.13943	0.00630125
AC005355.2	2.13859	0.0053126
AC079776.2	2.13023	0.0311358
METRN	2.12492	2.93216e-05
CD19	2.12353	0.0339413
CD207	2.12084	0.00315951
ACKR2	2.11191	4.2882e-05
CYP4B1	2.10998	0.00249356
CCDC151	2.10758	0.00145114
LINC00861	2.0957	0.000922094
FAM183A	2.094	0.00970692
AIM1L	2.0906	0.00587532
ITIH6	2.09058	0.00208938
C1orf127	2.07901	0.000411094
CAPN9	2.06723	0.0182811
ZMYND10	2.06033	0.000296436
CIB3	2.05292	0.00538025
C19orf81	2.05155	0.000385069
CTB-33O18.3	2.04703	0.00335633
NOX5	2.04148	0.000495862
NAT1	2.04056	0.0435593
FUT3	2.0316	0.0023971
SLC44A4	2.03028	0.0150066
NUF2	2.02975	0.0290857
BIRC5	2.02156	0.000998159
SEMA3B-AS1	2.01214	0.00958164
SLC6A17	2.01184	0.0024132
EDN2	2.0112	0.0124803
IFIT1	2.01075	0.00108498
CACNG4	2.00707	0.000649368
CCR7	2.0039	0.00353193
SCUBE1	2.00358	0.0118822
CCDC183-AS1	2.0025	6.19096e-05
INHBA	2.00228	4.6119e-07
RP11-510J16.5	2.00084	0.0029247
PACSIN1	1.98057	0.000255183
RP4-724E16.2	1.97715	0.0216729
SLC30A2	1.96852	0.00366038
FCRLB	1.96232	0.00431618
BMPR1B	1.95993	0.0100858
ACOT4	1.95262	3.24406e-05
ABCC11	1.95249	0.0348421
ATP2A3	1.95191	1.85699e-11
MISP	1.9477	0.0029247
RP11-57A19.2	1.9402	0.00882924
AURKA	1.93519	0.000252938
C2orf48	1.9333	0.0364526
CYP4F12	1.92692	0.0029247
ELOVL2	1.92412	0.00317359
TAS1R3	1.92069	0.000341689
DEGS2	1.92038	0.000373846
KIAA1467	1.91743	0.000148137
MATN3	1.90852	0.00228723
CLEC5A	1.89851	0.00222545
MUCL1	1.89574	0.0469657
RP11-589N15.2	1.89515	0.00552564
PIEZO2	1.89484	0.0365995
CEL	1.89376	0.000108585
HARBI1	1.89233	0.0029654
IFI44L	1.8881	0.000288268
DNAI1	1.88711	0.00722851
MYBL2	1.88571	0.00134173
PYHIN1	1.88501	0.0140764
RP11-423H2.3	1.88017	0.000303277
FGD3	1.87459	2.94226e-05
RP11-525A16.4	1.87426	0.0115164
EOMES	1.87324	0.000759799
LINC00337	1.87169	0.0123833
ICOS	1.8689	0.0254431
ADCY1	1.8643	0.000649368
RPL27AP5	1.86194	0.0368562
IL21R	1.8601	0.00112021
FGFR4	1.85791	0.00105247
DHCR24	1.85775	3.0724e-05
HIST1H3D	1.84224	0.00212376
HSH2D	1.8422	4.24729e-05
RSAD2	1.84163	0.000210544
WNT7B	1.83852	0.000150772
ALDH8A1	1.83812	0.0142134
DLG3-AS1	1.83497	0.0189832
ADAD2	1.83107	0.0264557
PGAP3	1.82982	5.51946e-06
MRPS30	1.82826	0.00619917
LINC00176	1.82817	5.26313e-06
SIX1	1.82595	0.00637539
RP11-304L19.12	1.82178	0.0111338
GFRA1	1.82135	0.00719125
TCAP	1.82018	0.000965048
GJB1	1.81874	0.0253159
CDCA8	1.81619	0.0088136
PLA1A	1.81235	0.0287178
TRPV6	1.80922	0.00320708
CD96	1.80836	0.00547622
RP5-1028K7.2	1.80625	0.00566071
NEURL1	1.80186	0.0427406
CYP4F11	1.80129	0.00604609
RIMS4	1.801	0.000341689
CXCR4	1.7993	0.00180249
LINC00514	1.79834	0.0228304
SLC39A6	1.79404	0.00235221
HIST1H4H	1.79353	0.00824262
CENPE	1.79189	0.00345697
FGFR3	1.78997	0.0175386
COX6C	1.7846	0.0026624
RASGRP1	1.78015	0.0271971
HIST1H3H	1.77747	0.022333
RP3-439F8.1	1.77443	0.00546161
FAM83E	1.77184	0.0158704
GATA3	1.77116	9.34717e-05
UBE2C	1.77026	0.0185225
SYCE3	1.76923	0.00776091
S100A9	1.76753	0.0196963
ANXA9	1.76114	0.00111332
C9orf117	1.75319	0.00517623
PDE6G	1.74938	0.000638523
FAM83D	1.7492	0.0426154
LAMP5	1.74674	0.00406364
MAPK15	1.73925	0.0269562
HIST1H1C	1.7352	0.000636153
RP11-503N18.1	1.73371	0.0124189
CACNA1H	1.73257	0.00334516
STARD3	1.73216	8.22203e-06
PRTN3	1.72736	0.0458661
SYT9	1.727	0.0188717
MAPK8IP2	1.72681	0.00026963
ANKRD22	1.72627	0.00271609
EPN3	1.72158	8.22287e-06
HMGCS1	1.71942	0.00269356
FAM83A	1.71925	0.0478481
LMTK3	1.71801	0.000119591
RP1-90J20.12	1.71581	0.0124189
PPAPDC1A	1.71518	0.0350869
AL512428.1	1.71462	0.027762
SNORA80B	1.71323	0.0111338
KCND3	1.71289	0.000649368
HGD	1.70752	0.0368007
RP11-379F12.3	1.70596	0.0129211
LRRC26	1.70579	0.000730818
S100A11P2	1.70367	0.0108525
IGHG3	1.70194	0.00381759
C5orf46	1.70104	0.0402657
S100A14	1.69915	0.000293627
SIAH2-AS1	1.69904	0.0124305
CACNA1I	1.69583	0.00661899
TMEM45B	1.69324	0.00409541
FBXL16	1.69255	0.00253943
PLA2G4F	1.69245	0.000519179
TTC16	1.69081	0.000180454
RP11-284F21.9	1.6863	0.0325003
MIAT	1.68336	0.000255183
RP11-279F6.3	1.68314	0.00553425
SPIB	1.68261	0.0219846
C1orf228	1.68119	4.07705e-05
HIST1H2AE	1.67731	0.00822303
GATA3-AS1	1.67332	0.00642704
HOTAIR	1.67294	0.0291134
LINC00853	1.67266	0.00120164
SLC9A3R1	1.66592	0.000454102
HJURP	1.66513	0.024449
C9orf106	1.6613	0.00713655
C3orf52	1.6596	0.0290857
RIBC1	1.65782	0.00461334
SYTL5	1.65648	0.0320901
MUC1	1.65614	0.000261234
ERMP1	1.65596	2.5893e-06
AC005789.11	1.6548	0.000981819
AC018804.7	1.6527	0.0458696
LINC00954	1.6518	0.0258821
PRR15	1.65133	0.000518947
SELL	1.64584	0.0198167
G6PD	1.64572	0.000108025
AC109826.1	1.64553	0.00318899
RP11-429J17.7	1.63627	0.00310686
B4GALNT3	1.63496	0.00127621
PTK6	1.63414	0.0013422
DOPEY2	1.63413	3.81558e-10
PAQR6	1.63209	0.000747562
AARD	1.63147	0.0138895
PPM1J	1.63094	0.00384315
MLPH	1.62783	2.5977e-05
TLE6	1.62517	0.00031884
SKA1	1.619	0.00940965
KIFC2	1.61883	0.00189638
BRSK2	1.61726	0.00668885
H2AFJ	1.6169	6.30915e-05
OAS1	1.61182	0.00220581
AC005077.14	1.61179	0.023141
TH	1.61125	0.0196255
IFIT3	1.61111	0.000786473
FGD6	1.60875	0.00060824
SEMA3B	1.60752	0.00618621
FOXM1	1.60509	0.0392131
CBR3	1.60359	0.0325003
CLPSL1	1.60327	0.0133656
CLDN9	1.59984	0.00262765
BCAS1	1.59977	0.00489705
SLC6A9	1.59951	6.82047e-05
LINC00160	1.59624	0.0123203
CLSTN2	1.59398	0.00179152
TCTEX1D4	1.59197	0.000221086
RP11-456D7.1	1.59173	0.00360842
TRIM36	1.59157	0.0243769
CDK1	1.58971	0.00466216
C15orf48	1.58771	0.0287863
HIST1H2BK	1.58289	0.000307413
TPX2	1.58114	0.0124485
HMGB3	1.57738	0.00172061
ENTPD8	1.57715	0.0109009
RNFT2	1.57508	0.00264723
CCDC78	1.57388	0.00149878
CTD-2521M24.9	1.57373	0.00486323
TMEM63C	1.57365	0.000183757
PARD6B	1.57182	0.0149919
SLC7A11	1.5701	0.0148662
RP11-436H11.1	1.56955	0.011431
RP11-96K19.5	1.56717	0.0450652
BAI2	1.56369	0.0023996
AC090616.2	1.5569	0.0119197
OAS3	1.55589	0.00360842
NUSAP1	1.5534	0.00637817
TK1	1.5524	0.00466511
BIK	1.55122	0.000910786
ARTN	1.54604	0.0148662
UCP2	1.54579	8.63211e-05
RP11-459E5.1	1.54194	0.0439237
KIAA1257	1.54177	0.00649669
PAQR4	1.53816	0.0439029
PLIN5	1.53711	0.0190607
BST2	1.53646	0.00140453
CD52	1.53606	0.00246195
RP11-496I9.1	1.53582	0.00348591
SULT1A2	1.53548	0.00561644
RP11-54O7.3	1.53225	0.00648995
DNAAF3	1.5303	0.00283397
TMC7	1.52658	0.0288295
HSD17B6	1.52629	0.0443855
PRR15L	1.52584	0.000192832
SPAG1	1.5235	0.00026963
ZSCAN1	1.52212	0.0128483
SCIMP	1.51908	0.0432382
GCHFR	1.51659	0.000447023
ELP2	1.51253	8.70927e-06
SPEF1	1.51217	0.00729111
DOK7	1.51213	0.0299039
RAB31	1.50893	0.000573634
MGAT4A	1.50819	0.000580112
BLK	1.50344	0.0274988
UBE2T	1.50171	0.0184644
EME2	1.49658	1.8983e-06
RHBG	1.49626	0.0212759
CAPS	1.49157	9.28753e-05
CAPN8	1.48981	0.0128715
MIR210HG	1.488	0.000443236
SYT17	1.48635	0.00375234
RP3-395M20.12	1.48353	0.000709523
ADAM15	1.47973	0.000233069
HSPB1	1.47937	0.00125982
RN7SL3	1.47876	0.0356488
PRKCB	1.47814	0.0369042
UBXN10	1.47176	0.00854328
TAF1B	1.47073	0.00523107
CTD-2015H6.3	1.47009	8.73845e-05
RP13-122B23.8	1.46997	0.00846826
EPO	1.46975	0.0328041
KB-1440D3.13	1.46801	0.0124803
RHBDL1	1.46799	8.28462e-05
REEP1	1.46753	0.00122262
QDPR	1.46506	0.00529895
RP3-455J7.4	1.46426	0.0158629
STARD10	1.464	0.00227526
RPS19P3	1.4613	0.0150239
TBC1D10C	1.45854	0.00149878
TMEM132A	1.45844	0.00208773
RASGRP2	1.45734	0.00149878
MROH6	1.45661	5.88833e-06
ENPP3	1.45063	0.0458661
TNFAIP8L2	1.44778	0.00768059
ESPN	1.44384	0.00170263
HAGHL	1.44375	0.000113264
GPR39	1.44309	0.0165188
FOXP3	1.44284	0.0196153
SAMD9	1.44022	0.00248859
STAT1	1.43895	0.000976756
RAMP1	1.43591	0.00255329
KRT18P17	1.43217	0.0110363
LA16c-431H6.6	1.43053	0.0370131
RP11-284F21.10	1.42921	0.0246594
CISD3	1.42918	0.000781786
EFNA3	1.42904	0.0310402
ESR1	1.42822	0.0483976
CCDC170	1.42657	0.00147787
BCAS4	1.42316	0.00685935
CCNO	1.41481	0.0102166
CTD-2319I12.1	1.41459	0.0059929
CCL19	1.41421	0.0343931
SGK3	1.41251	0.0123885
CAPN13	1.40851	0.00458235
CACNA1D	1.40803	0.00786534
MKI67	1.40785	0.0482759
RAET1E	1.40768	0.0235863
LASP1	1.40753	0.00489705
KPNA2	1.39851	0.0104164
KRT18P28	1.39754	0.00461276
CENPM	1.39631	0.0134121
DBNDD1	1.39486	0.00762278
LA16c-313D11.9	1.39369	0.0497332
EVL	1.39291	0.00134163
RP11-523H20.3	1.39038	0.0317953
SLAMF9	1.38869	0.0432382
NKD1	1.38835	0.0479302
HIST1H2BH	1.38738	0.0494055
HID1	1.38358	0.000437099
F12	1.38264	0.00289688
C1QTNF6	1.38241	0.000282064
GGT1	1.38142	0.00345464
SLC1A1	1.37881	0.0382346
RP11-545E17.3	1.37855	0.036852
PMM2	1.37854	0.0221687
LRRC46	1.37602	0.00209678
ALCAM	1.37536	0.00630125
TMEM40	1.37518	0.0149919
WDR62	1.3739	0.000713793
KNDC1	1.36731	0.0468911
PAX9	1.36674	0.0283497
XXbac-B135H6.18	1.36461	0.00619917
CORO2A	1.3618	2.5893e-06
CRAT	1.36158	0.0116732
SULF2	1.36074	0.000831611
CCDC19	1.35865	0.012291
VWA2	1.35806	0.0123639
PROC	1.35639	0.0463466
KCP	1.35134	0.00784394
RP11-94L15.2	1.351	0.0391759
RN7SL832P	1.34966	0.022333
C9orf152	1.34907	0.000596115
TYMP	1.34675	2.51549e-05
IQGAP3	1.34669	0.038326
HILPDA	1.34593	0.000611283
DPEP1	1.34555	0.0405446
UBE2L6	1.34462	0.000789951
SULT2B1	1.34137	0.00778955
CANT1	1.34058	0.00205912
FAM178B	1.33803	0.0305766
PXMP4	1.33734	0.009215
ASF1B	1.33733	0.016551
PRICKLE4	1.33718	0.0065269
GNA14	1.33567	0.0190119
LEF1-AS1	1.33421	0.0429444
TNFRSF18	1.33326	0.000914779
IRF7	1.33094	1.81907e-05
CTA-357J21.1	1.32758	0.0339701
ECM1	1.32206	0.00301469
LA16c-380H5.5	1.32119	0.00741614
LRRC73	1.32043	0.0075663
EFCC1	1.31082	0.00661272
AP1S1	1.30836	0.00373743
E2F2	1.30562	0.0288217
REEP6	1.30528	0.00845317
RHOH	1.3045	0.00886587
HIST1H2BD	1.30361	0.0323231
LCN12	1.30268	0.00936015
BRWD1-IT2	1.30038	0.0289378
STEAP4	1.29765	0.0388987
CDKN2A	1.29544	0.00630125
GPR137B	1.29466	0.000333004
FBP1	1.2942	0.00228442
CTXN1	1.29274	0.022333
MYCL	1.28972	0.0362092
BGN	1.28972	0.0291265
RP11-120K24.5	1.28855	0.0402657
CDH24	1.28765	0.0370204
RAPSN	1.28748	0.0118059
PRRT3	1.2869	0.000211617
LMNB1	1.28674	0.0331993
SQLE	1.28555	0.00301469
RP11-480I12.5	1.28535	0.0104192
PTTG1	1.2846	0.0418111
CTD-2561J22.5	1.28049	0.0463667
ADM2	1.27784	0.00464506
SIDT1	1.27567	0.0026624
IFI44	1.27562	0.0308851
FOXA1	1.27468	0.005576
MYO1G	1.2732	0.00328686
DNASE1L2	1.27222	0.00424656
SDC1	1.27066	0.000123855
CELSR2	1.27049	0.00957084
ZG16B	1.26968	0.00753336
WNT2B	1.26948	0.00521031
IFI35	1.2589	0.00522208
NPAS1	1.25516	0.0152994
RP11-196G18.22	1.25473	0.00739388
ZNF28	1.25383	0.00507761
PTPN7	1.25289	0.00380131
MAGED2	1.25197	0.00183739
FOXS1	1.24896	0.00564807
PRSS27	1.24839	0.0436487
GPRC5A	1.24625	0.0101937
ZWINT	1.24621	0.0362204
PBX3	1.24155	0.0110198
PPP1R37	1.24155	0.00562867
KCNK6	1.2381	0.00221996
CELSR1	1.23807	0.00432566
DOCK3	1.23705	0.0127247
CTSD	1.23676	0.00227526
TSPAN15	1.23557	0.0208754
PMEPA1	1.23404	0.000167217
SLC1A4	1.2334	0.0398571
ARSG	1.23048	0.000791486
HEBP1	1.23026	0.00293618
EMB	1.2278	0.0148047
GPR160	1.22521	0.00278642
LRRC56	1.2241	0.00253084
C5orf63	1.22246	0.00083049
TTC39A	1.22225	0.0151585
TMEM210	1.21998	0.0306479
RAB11FIP4	1.21983	0.000498087
C9orf116	1.21769	0.0124201
RAMP3	1.21572	0.00189686
SLC2A6	1.21208	0.00375759
RGS1	1.21184	0.038068
PLEKHN1	1.21153	0.0026031
NCDN	1.21108	0.00374238
FAIM3	1.21081	0.018229
RP11-800A3.4	1.21	0.0259511
TMEM233	1.20688	0.0402832
LRRC10B	1.20259	0.0298866
ZDHHC11	1.2003	0.0180137
MYB	1.19921	0.0351409
LDLRAD4	1.19824	0.000108025
ANO9	1.19687	0.000449269
RP4-740C4.8	1.19204	0.0159175
MMP15	1.19021	0.000161699
CD6	1.18895	0.0196153
CPPED1	1.18719	0.0271468
RAB26	1.18536	0.00307999
ZNF385A	1.18454	0.00984603
SMIM22	1.18274	0.0398758
C9orf163	1.18073	0.0188603
FAM83H-AS1	1.17998	0.00366038
GSTM3	1.17929	0.0250928
TRIB3	1.17892	0.00521165
CCDC88C	1.175	0.00163334
RHPN1	1.17445	0.000262951
ABHD3	1.17435	0.00989743
BPGM	1.17212	0.00816476
CTD-2583A14.11	1.17192	0.00358018
N4BP3	1.17088	0.00235288
PPIL2	1.1702	0.00280789
SERHL2	1.16972	0.0368562
TMC6	1.16842	1.89555e-05
SLC16A3	1.16603	0.0010531
ATOX1	1.16459	0.00167248
SLC30A4	1.16417	0.0108407
ACOT11	1.16368	0.0157971
KRT8	1.16318	0.0144679
SLC27A4	1.16304	0.000292657
AP1S3	1.15893	0.0135287
CXCL14	1.15722	0.0477169
TMC5	1.15604	0.0329332
HIGD1A	1.15369	0.0439029
ZNF675	1.15284	0.0325788
SH2D4A	1.15274	0.0251522
NQO1	1.15215	0.0475757
DRAXIN	1.15013	0.0276539
S1PR3	1.14959	0.00676703
TOB2P1	1.14626	0.0341106
PSMB3	1.14399	0.018634
ITGAL	1.14254	0.00460373
IL4I1	1.13592	0.0131858
RPS10P7	1.13464	0.0276707
P2RY6	1.13438	0.00958164
FBXO6	1.13328	0.00336196
RLTPR	1.13121	0.0439184
RP6-65G23.3	1.13087	0.0489373
IGSF9	1.13051	0.0178292
CYP2J2	1.12832	0.0363565
AR	1.12832	0.0122036
RNF213	1.12624	0.000910786
LAMTOR2	1.12598	0.000698563
TIAM1	1.12527	0.00822303
SNORA77	1.12343	0.0408123
FLVCR1-AS1	1.12071	0.0458661
TMEM79	1.12031	0.00134851
AC009961.3	1.1197	0.0251794
C6orf141	1.11889	0.0169601
S1PR4	1.1185	0.0230895
KCNK1	1.11739	0.0345025
ZAP70	1.11727	0.0147374
FUT2	1.11658	0.0418086
SLC4A2	1.11453	0.0121228
EDARADD	1.11403	0.0403235
IDH2	1.11359	0.000678735
FAM159A	1.11322	0.0173994
PROM2	1.10835	0.000311828
PGP	1.10719	0.00112021
GIPR	1.10665	0.0390223
JADE3	1.1037	0.0403316
ABCA7	1.1034	0.000638247
BNIPL	1.1033	0.0108407
SRCIN1	1.10275	0.00957084
SASH3	1.10252	0.039503
CARD14	1.10241	0.0145863
FAM213B	1.10219	0.00147787
TNRC6C-AS1	1.1006	0.0257542
TBC1D9	1.09803	0.0312725
TMEM150C	1.09667	0.0346989
SERINC2	1.09625	0.00950827
KIAA1244	1.09476	0.0036151
LINC01134	1.09456	0.0250167
PSTPIP1	1.09407	0.0299979
PCSK4	1.09074	0.00854094
DPP3	1.08996	0.0118161
CTB-58E17.1	1.08774	0.0152722
PAFAH1B3	1.0862	0.00172452
SH3D21	1.08387	0.00619917
SFXN1	1.08365	0.00202622
SLC2A1-AS1	1.08287	0.0290857
NAPSB	1.08168	0.0165871
RALGPS2	1.08092	0.0369042
CTD-3193O13.9	1.08061	0.0200979
SFXN5	1.07905	0.00476894
SRD5A3	1.07864	0.0363724
SEMA3F	1.07864	0.00113918
ATG9B	1.07801	0.0097233
RP11-465B22.3	1.07748	0.0304124
MAL2	1.07701	0.0419654
CCDC183	1.07585	9.88119e-05
BRI3BP	1.07472	0.000600393
STX1A	1.07132	0.00330843
FOXO6	1.07077	0.00899479
TMC8	1.06804	0.0105438
LDLRAD3	1.0677	0.019945
GRAP2	1.06704	0.0432445
SPN	1.06486	0.0165871
PKM	1.06465	0.0343462
TSTA3	1.06406	0.000910786
E2F1	1.05867	0.0326579
ABCC3	1.05635	0.0397535
TSPAN17	1.05593	3.76999e-05
TBC1D24	1.05489	0.000871071
HIST1H2AC	1.05263	0.0477169
C9orf91	1.05207	0.000401969
C1orf216	1.04999	0.0178233
FAM110A	1.04851	0.0097233
MTFR1	1.04751	0.0251522
TJP3	1.04743	0.0158629
FAAH2	1.0461	0.0123833
ARHGDIB	1.04569	0.00642979
TLCD1	1.04172	0.0375683
ZBTB42	1.04114	0.00687058
GPR132	1.04109	0.0146959
C20orf144	1.04097	0.0460187
ADAP1	1.04049	0.0048889
LPCAT1	1.03795	0.00152536
LIMD2	1.03753	0.00351601
CRIP2	1.03559	0.00621913
CARD11	1.03504	0.0322906
SLC22A18	1.0348	0.000925167
LINC00884	1.03428	0.0147374
RASSF7	1.03403	0.00265538
RECQL4	1.03321	0.00236315
MBOAT7	1.0321	0.00130084
MTL5	1.03153	0.0319951
CD84	1.03151	0.0173843
AIFM3	1.02988	0.0203288
CACFD1	1.02904	0.00220214
PRLR	1.02617	0.00546161
ECT2	1.02479	0.017264
ARNT2	1.02427	0.0211785
PYCRL	1.02414	0.005576
ZNF185	1.02402	0.0180923
FAM173B	1.02321	0.0150404
SCCPDH	1.02125	0.00262765
TAGLN2	1.01747	0.00348591
MPV17L	1.01628	0.0291046
VAV3	1.01222	0.0209531
TIMELESS	1.01081	0.0260328
SLC25A10	1.0103	0.00205124
LINC00467	1.00519	0.0369042
POU2F2	1.00446	0.0252529
CAPG	1.00311	0.0155241
SERTAD4	1.00286	0.0297433
MMP17	0.999952	0.0110206
ATP6V0B	0.997242	0.000965665
TPRN	0.996894	0.00552564
PITPNM1	0.996421	0.00466216
TBC1D30	0.995315	0.00869392
CD37	0.99461	0.0322417
SPDEF	0.993897	0.049697
SYK	0.993745	0.0128972
LLGL2	0.993597	0.0118179
LMX1B	0.99103	0.0204522
PLEKHF2	0.989684	0.0428593
PTPLAD1	0.986927	0.0142484
PIGQ	0.98033	0.00177583
ABHD11	0.979999	0.013186
CYB5A	0.979846	0.0205371
ZNF587	0.977845	0.00205673
RP5-882C2.2	0.976196	0.0416619
CCDC40	0.975363	0.0243891
S100A16	0.974664	0.0453041
MRPS7	0.972167	0.0250167
BLVRA	0.971322	0.0104164
ABCG1	0.970143	0.0282087
FAM174B	0.968938	0.0330542
PAAF1	0.968534	0.0419321
PCDH1	0.967976	0.0036628
RASAL3	0.967472	0.00618542
PSMD3	0.966521	0.0142484
CYB561	0.963998	0.0111826
ENO4	0.962137	0.0301813
PRDX1	0.961357	0.0259858
GGCT	0.960483	0.0189708
ULK4	0.958664	0.0332363
PIK3R3	0.95762	0.0285765
ASAH1	0.957379	0.0199689
TMEM63B	0.956408	0.0122759
SIGIRR	0.954188	0.000998159
RNF208	0.952317	0.00631455
AC012358.8	0.951607	0.0427462
MSX2	0.950641	0.0497332
ZNF467	0.948332	0.0053126
GPR68	0.947617	0.0399185
VOPP1	0.94499	0.0430658
HN1	0.94196	0.0155865
CCNF	0.941306	0.0146957
SDF2L1	0.935341	0.00414004
C16orf59	0.934764	0.0458661
HTATIP2	0.934101	0.0135287
TMEM8A	0.928002	9.82933e-06
MARVELD3	0.927248	0.0146957
DDX58	0.926962	0.00931711
MARVELD2	0.926871	0.0264423
MYO5B	0.924893	0.0156574
TMED3	0.924523	0.0441035
CCDC167	0.920865	0.00997043
ARHGEF16	0.919868	0.00475092
RP5-1065J22.8	0.91802	0.0331795
CREB3L4	0.916241	0.0391759
TMEM254	0.914351	0.00459139
FBXO36	0.910024	0.0437982
FAH	0.90865	0.0271468
CIITA	0.908634	0.0277196
ALDH4A1	0.908609	0.012291
MAPK13	0.907701	0.0216935
FLAD1	0.906545	0.000681164
MST1R	0.904363	0.0165871
APOLD1	0.902655	0.0147374
RP11-307C12.11	0.902025	0.0322854
PRR19	0.901185	0.0398571
ARHGAP30	0.900796	0.0147663
NDUFS2	0.90052	0.0108407
TMEM241	0.899758	0.0277093
TMEM110	0.89762	0.0110206
SLC50A1	0.89728	0.0099873
ASIC3	0.896428	0.0304124
CCDC125	0.89642	0.00625784
TRIM14	0.895523	0.0348378
KLHL35	0.894433	0.0279043
PCBD2	0.893841	0.0193134
DUSP18	0.891338	0.00892688
CERS4	0.89065	0.0366362
ANGPTL7	0.890529	0.00390762
SCO2	0.888386	0.0083901
ZNF552	0.887522	0.0295099
TMEM54	0.887362	0.030747
LRRC59	0.88586	0.0108525
SLC39A11	0.883203	0.00498237
MAST4	0.882126	0.00753203
AKR1A1	0.881489	0.0325909
FAAH	0.881333	0.0166027
RRP36	0.879417	0.0276795
SGPL1	0.879405	0.00260912
CIB1	0.879243	0.0250167
ABHD2	0.878	0.0399591
CELSR3	0.875972	0.0495567
ST3GAL1	0.875341	0.0094289
MED1	0.873893	0.0154709
SDSL	0.873773	0.0303095
GPC1	0.873244	0.000709523
EPT1	0.870798	0.010464
STRBP	0.869932	0.0370204
RAB37	0.869659	0.0132816
RHOC	0.863445	0.00710427
COMTD1	0.862877	0.0217246
CYB561A3	0.862371	0.0391545
TMEM141	0.860679	0.0326666
ZDHHC24	0.85838	0.00649669
RIPK3	0.858186	0.0246594
PLGRKT	0.856896	0.0427406
CLDN7	0.856046	0.0123639
WDR24	0.85602	0.00997043
AMDHD2	0.855945	0.0233186
C17orf62	0.853175	0.00019889
PCDH17	0.849793	0.0427462
FAM83H	0.848646	0.00826607
TRIM24	0.84365	0.0284312
FAM45A	0.840017	0.0259858
ZNF296	0.838449	0.0429406
SLC26A6	0.836541	0.00828714
VANGL1	0.836466	0.032876
ARHGAP39	0.835491	0.0291503
SIL1	0.835046	0.00649924
STXBP2	0.834611	0.0455277
ADIPOR2	0.829579	0.0263738
EVPL	0.829189	0.0439029
GMIP	0.823058	0.00222545
INF2	0.822213	0.00354813
ACOT2	0.819925	0.00625784
LGALS8	0.817137	0.0224988
PKP3	0.814885	0.0469657
SH3BP5L	0.812466	0.0479803
UQCC2	0.810031	0.0324695
PDIA4	0.807649	0.00619657
PYCARD	0.80749	0.0388927
COMMD7	0.805619	0.00558512
FBXO41	0.805331	0.00595032
DHTKD1	0.804837	0.0100668
ATP13A2	0.80287	0.0140077
HLCS	0.80224	0.000950358
SSPO	0.801071	0.0195912
C2orf68	0.800657	0.0150111
PGD	0.800037	0.0258821
LPGAT1	0.799699	0.0053126
HN1L	0.798002	0.0123548
ERBB3	0.79639	0.0344627
SNRNP25	0.794526	0.0397885
EZR	0.79174	0.0428593
SHB	0.79079	0.0114151
ZMPSTE24	0.790618	0.0241831
UQCRQ	0.788191	0.0141828
GRHL2	0.787944	0.0154913
MEGF9	0.785742	0.0284312
MTHFD2	0.781804	0.0253012
ACSF2	0.781675	0.0396964
YIPF1	0.780487	0.0085202
KIAA1841	0.779913	0.0457768
F11R	0.779901	0.0126532
KIAA0319L	0.777924	0.000336947
NUDT16L1	0.775273	0.0208754
HMHA1	0.775254	0.0331162
LRBA	0.774785	0.00235807
SPINT2	0.773632	0.0225551
RABEP2	0.773257	0.00984843
ACAP1	0.772493	0.033114
DTX2	0.771356	0.0105212
ORAI2	0.769752	0.017218
ESRP2	0.768817	0.0331685
GGPS1	0.767177	0.0211657
RABL6	0.765698	0.00250809
GEMIN7	0.764177	0.0055916
ZDHHC12	0.763045	0.0378967
IMPDH1	0.76166	0.0307939
FAM102A	0.757838	0.0250425
RUNDC1	0.75575	0.0202651
ATP6AP1	0.755657	0.0332762
ABCD1	0.754488	0.0435951
FAM173A	0.753777	0.0376445
SEC22B	0.752318	0.022234
MRPL41	0.751656	0.00619917
PTPN6	0.745803	0.0147374
ABCB8	0.745467	0.0127716
INTS7	0.745062	0.0299991
RHBDD2	0.744448	0.027976
KIAA1522	0.740919	0.0200357
NAPRT1	0.740642	0.0478157
MRPS16	0.738543	0.00684183
VPS37C	0.737939	0.0312725
LRWD1	0.737416	0.0375676
PARP12	0.736237	0.030747
RALGPS1	0.734853	0.0118873
TMUB1	0.734216	0.00815222
NME1	0.730029	0.0324101
GLE1	0.729597	0.0346989
EMP2	0.729086	0.00169529
NEK6	0.728295	0.0259662
TTC39C	0.727565	0.0281221
H2AFY	0.723259	0.00465918
NECAB3	0.720687	0.0437415
LMAN2	0.71727	0.0287863
MSI2	0.717223	0.0369042
RP11-212P7.2	0.716568	0.0264262
PDLIM5	0.716449	0.0199172
ZNF626	0.715099	0.0359856
SCAND1	0.714656	0.0455515
NHLRC2	0.713194	0.0497371
FAM211B	0.709168	0.0299353
UGGT1	0.707055	0.00546632
SMIM12	0.704126	0.00579945
IFT122	0.703862	0.0374214
PHPT1	0.702773	0.0211775
ARPC1B	0.69863	0.00132345
ATF5	0.697109	0.0211776
ARHGAP4	0.693936	0.0290857
YIF1B	0.691903	0.0270742
GPR137	0.689288	0.0101098
GFER	0.688987	0.0328828
MAGI3	0.685164	0.0351056
CCDC159	0.685072	0.00996303
DCTPP1	0.683448	0.0335587
RANGAP1	0.682274	0.0250167
ASPSCR1	0.681822	0.00688413
SLC37A1	0.681762	0.0320901
TTLL5	0.681563	0.0406238
AGPAT3	0.678767	0.00205351
STIP1	0.678597	0.0097785
SLC25A22	0.674723	0.0469161
SLC19A1	0.673418	0.025204
SLC52A2	0.672481	0.00937324
LIMK1	0.670953	0.0293957
NADK	0.670404	0.0439184
UFD1L	0.669683	0.0142098
TNMD	0.668745	0.0328828
KCTD17	0.663312	0.0131858
OTUD7B	0.662539	0.00694475
APMAP	0.660352	0.0297026
ARHGAP32	0.65927	0.0330337
POMT2	0.65841	0.022333
FAHD1	0.657996	0.0479302
TONSL	0.655539	0.0455191
CHPF	0.649858	0.0343462
CEP104	0.641105	0.00499163
CORO7	0.636874	0.0119197
DPP7	0.632191	0.0472385
SORT1	0.631445	0.0180807
RNPEPL1	0.629723	0.0189708
ARMC7	0.629679	0.0243769
PCYT2	0.625836	0.0317495
WHSC1	0.625627	0.0257548
TMEM87B	0.622714	0.0463539
PNKP	0.622478	0.0308851
SOX12	0.621962	0.0495567
RAB3D	0.621891	0.0232913
NME3	0.621137	0.0444639
BTBD9	0.619597	0.030323
MIR940	0.611948	0.0374214
FBXW5	0.609455	0.0353763
ADAR	0.60889	0.0375788
ISOC2	0.605142	0.0306929
AAGAB	0.603004	0.0306929
LRRC1	0.600598	0.00856564
MICAL1	0.58912	0.0402657
C17orf70	0.588013	0.0317424
GTF2IRD1	0.584224	0.0137113
GGCX	0.582007	0.0124803
ANXA2	0.564033	0.0411782
HDGF	0.556342	0.0094289
LINC00963	0.554315	0.0235236
PCYT1A	0.553833	0.0402657
RREB1	0.549931	0.0427932
VPS18	0.54108	0.0274331
IQSEC2	0.5406	0.0125741
CDK16	0.540406	0.0301813
ODF2	0.540055	0.0075652
TBC1D16	0.510633	0.0437415
GPR107	0.502086	0.0335587
CAPN1	0.499568	0.0296609
UBE3C	0.473788	0.0276707
ZBTB40	0.473172	0.0312725
UBE2H	0.471016	0.0386187
HIF1AN	0.394586	0.0407102
ZNF683	0.259652	0.00434877
FGF10	0.248769	0.00916259

## Sheet: STAR_EdgeR_up_DCIS_vs_Normal
Gene ID	log2FC (DvN)	p-value
S100A7	7.67694	2.23299e-11
C2orf54	5.78758	2.96878e-12
DSCAM-AS1	5.60468	2.47915e-08
ABCC12	4.95094	3.00233e-11
NCCRP1	4.81386	3.19576e-10
S100P	4.66071	2.7976e-08
IL2RB	4.56196	2.49539e-12
GRM4	4.32854	3.2026e-08
C8orf34	4.24683	2.08403e-06
CLEC3A	4.23911	1.80839e-05
DHRS2	4.22667	2.42104e-06
NKAIN1	4.14848	9.1036e-09
CEACAM6	3.98042	3.20386e-08
RRM2	3.88773	1.21428e-09
RP11-324D17.1	3.7896	2.72121e-06
ISG15	3.6975	2.17579e-14
MSMB	3.69437	8.35916e-07
PYDC1	3.66045	6.15606e-05
CST9	3.65583	0.000198261
IFI6	3.63274	1.95494e-12
AC110619.2	3.61119	8.30671e-11
CACNG8	3.56871	2.03604e-11
NXPH4	3.5482	2.1572e-09
GLYATL2	3.47372	9.5183e-06
SULT1C2P1	3.47344	6.88081e-06
CNTNAP2	3.45928	2.58774e-07
CLCA2	3.45494	2.77515e-06
COL10A1	3.40816	1.6967e-09
TMPRSS6	3.40519	1.56537e-06
PAX2	3.35364	2.47676e-07
AC004461.4	3.26095	0.00172448
KCNJ3	3.2417	1.67475e-08
AC132872.2	3.18699	3.49617e-07
BEX1	3.17196	0.000636949
RPL37AP8	3.15854	0.00188656
RP11-1042B17.1	3.08964	0.00556783
CDHR3	3.06594	3.61091e-07
CST1	3.06128	0.000711258
ERBB2	3.05548	7.4064e-12
RP11-206M11.7	3.05177	6.08975e-05
RP11-3M1.1	2.9965	2.59873e-07
PGLYRP2	2.98138	5.49868e-05
AL391421.1	2.91822	1.25267e-05
MIR142	2.90379	8.40012e-07
EEF1A2	2.86996	6.89982e-07
CNTD2	2.8678	6.75139e-06
ABCA12	2.8653	7.95694e-06
KIF1A	2.85949	3.42977e-05
KCNF1	2.85377	4.62556e-05
MMP11	2.82743	8.12021e-07
PPP2R2C	2.78244	2.50395e-05
OASL	2.7735	1.18424e-09
PNMT	2.7326	0.00012453
KYNU	2.70651	2.46304e-05
CYP2B7P	2.6879	0.00018649
CLIC3	2.67424	2.73435e-09
CRIP1	2.66503	2.40577e-09
CXCL9	2.64742	3.67631e-05
GZMM	2.64322	3.57101e-05
OAS2	2.6422	6.07735e-09
TNNT1	2.63729	0.000597601
PSCA	2.62858	0.000229585
IGHG2	2.62397	7.4195e-05
CCDC74A	2.57428	4.52657e-05
CST2	2.54116	0.000187425
ASCL2	2.52123	6.16637e-10
GABRD	2.51883	1.84705e-12
GJB2	2.51123	0.000114861
RPS26P2	2.47571	0.00213923
KLHDC7A	2.4684	2.91426e-05
AKR7A3	2.4615	5.81319e-07
ALDH3B2	2.45107	6.82655e-06
SRPK3	2.44517	4.30083e-07
CHRDL2	2.40389	5.00971e-06
FADS2	2.39048	2.78645e-06
ATP8A2	2.37087	9.69856e-05
MS4A1	2.36377	0.00162706
HES2	2.36114	0.000104275
CCDC64	2.3415	1.13667e-07
MX1	2.32505	2.46972e-07
C9orf169	2.31989	3.36019e-09
CHST1	2.31347	5.16977e-08
CYP4F8	2.3034	0.0217614
IFI27	2.3012	1.57807e-07
KCNK15	2.29869	1.02176e-06
SPOCD1	2.28498	2.99137e-06
BPIFB1	2.28155	0.000200475
TSPAN1	2.25425	3.39265e-05
TINCR	2.24628	1.57842e-06
ERP27	2.23493	0.00012589
AGTR1	2.23271	0.000140585
MIEN1	2.23129	8.65256e-07
IGSF1	2.20872	0.00129455
TUBB3	2.20769	3.5937e-06
CST6	2.20497	1.20488e-07
RP11-53O19.1	2.20228	0.00449162
DCD	2.19475	0.0191652
AC079776.2	2.1929	0.00201945
HRASLS2	2.19108	4.08059e-05
GLA	2.18599	0.000338435
AC093642.3	2.18389	5.814e-06
METRN	2.1752	6.07222e-07
TMEM86A	2.16421	2.50379e-07
ATP6V1C2	2.16163	0.000116184
RPL18P13	2.13843	0.000851223
NUDT8	2.13567	1.89657e-06
ZMYND10	2.13211	6.3168e-06
AL161626.1	2.12341	0.0490327
AC005355.2	2.11828	0.000314881
CCDC151	2.11475	7.93384e-05
NAT1	2.10114	0.00345999
RP11-467I20.3	2.09968	0.00559117
FIBCD1	2.09079	0.00450044
ABCC11	2.08631	0.00133962
FAM183A	2.08275	0.00042949
SCUBE1	2.07342	0.000738675
CYP4B1	2.07053	0.00012739
COMP	2.06626	0.0341605
NOX5	2.06113	1.74878e-05
IFIT1	2.06101	4.3832e-05
C19orf81	2.0581	9.07518e-06
BMPR1B	2.05586	0.000657976
LINC00861	2.04794	4.14329e-05
CCDC183-AS1	2.04793	2.74213e-06
MKX	2.0472	0.00519407
CACNG4	2.03179	1.954e-05
INHBA	2.02137	1.3471e-08
SEMA3B-AS1	2.01952	0.000518753
MISP	2.0149	0.000122264
ELOVL2	2.01456	0.000120546
PACSIN1	2.01352	4.91649e-06
NPY1R	2.01306	0.00532517
BIRC5	2.0085	3.1757e-05
ATP2A3	1.99191	1.3553e-12
SLC6A17	1.99145	8.87996e-05
BTK	1.99055	0.00114352
RP11-1260E13.1	1.9875	0.00575008
MATN3	1.98196	0.000147497
EDN2	1.98094	0.00118834
DEGS2	1.97714	9.25823e-06
CYP4F12	1.96151	0.000147553
CCR7	1.95897	0.000213035
PIEZO2	1.94603	0.00294602
ACOT4	1.94238	1.64919e-06
RP11-423H2.3	1.94146	5.85111e-06
TAS1R3	1.93734	8.24064e-06
FAM83E	1.93724	0.000827812
KIAA1467	1.9367	4.21798e-06
EOMES	1.93073	2.69196e-05
RP11-214O1.3	1.92971	0.00408564
SLC30A2	1.9254	0.00016777
ADCY1	1.92015	1.69626e-05
DNAI1	1.91216	0.000339965
FGD3	1.90827	5.15266e-07
RSAD2	1.90481	4.06766e-06
CEL	1.90298	2.36876e-06
IFI44L	1.90286	9.08916e-06
CTB-33O18.2	1.90253	0.0034167
WNT7B	1.89907	2.98847e-06
MYBL2	1.89636	5.31667e-05
CXCL10	1.89316	0.0104978
MUCL1	1.88787	0.00553819
FGFR4	1.8873	4.15613e-05
DHCR24	1.88528	4.45855e-07
SIAH2-AS1	1.88078	0.000721553
GRB7	1.8799	5.86945e-06
TCAP	1.87796	3.1167e-05
HIST1H3D	1.87002	8.3228e-05
LINC00176	1.87001	5.43654e-08
HSH2D	1.86078	7.36183e-07
RP11-503N18.1	1.85917	0.000749981
GFRA1	1.8587	0.000553897
NEURL1	1.85496	0.00294868
IL21R	1.8531	5.63169e-05
FGFR3	1.84932	0.000967765
PGAP3	1.84853	8.02001e-08
RP3-439F8.1	1.84785	0.000259157
AIM1L	1.84738	0.000452805
MRPS30	1.84613	0.000576955
CYP4F11	1.83905	0.000300321
GJB1	1.83631	0.00144647
ANXA9	1.8353	4.16562e-05
TRPV6	1.83336	0.000143071
SIX1	1.83282	0.000474047
RIMS4	1.8319	8.12963e-06
SLC39A6	1.83001	0.000132848
COX6C	1.82218	0.000148626
CXCR4	1.8143	9.98422e-05
LAMP5	1.80909	0.000438717
MAPK15	1.80856	0.00168346
GATA3	1.80654	2.00916e-06
CD96	1.80236	0.000373552
FAM83A	1.79227	0.00302626
SYCE3	1.79165	0.000403643
SLC7A4	1.78962	0.00535863
CLEC5A	1.78912	0.000180164
CHST8	1.78808	0.011586
ANKRD22	1.78487	0.000115105
S100A9	1.77891	0.00163458
KCND3	1.77885	1.69425e-05
CALML5	1.77691	0.0178903
C6orf223	1.77394	0.0417636
STARD3	1.76429	7.68357e-08
EPN3	1.76375	5.34515e-08
MAPK8IP2	1.76129	5.65942e-06
TMEM45B	1.75634	0.00019899
HIST1H1C	1.75394	1.80124e-05
IGHG1	1.75175	0.00507133
LRRC26	1.74409	1.64345e-05
LBP	1.74359	0.0284661
RP11-379F12.3	1.7434	0.00110431
S100A14	1.7342	6.92055e-06
DLX2	1.7297	0.0328465
LMTK3	1.72884	2.47942e-06
IGHG3	1.72623	0.000236212
AC005789.11	1.72527	5.42843e-05
FBXL16	1.7239	9.44169e-05
CACNA1H	1.72268	0.000170239
UBE2C	1.71918	0.00137683
SLC9A3R1	1.71041	8.20007e-06
PPM1J	1.70957	0.0001398
PPAPDC1A	1.70871	0.00408075
MUC1	1.70713	4.65199e-06
PLA2G4F	1.70676	1.50746e-05
BCAS1	1.7053	0.000176018
PRR15	1.70454	2.7786e-05
RP11-284F21.9	1.70177	0.00302569
HIST1H1B	1.70121	0.00742587
GATA3-AS1	1.70022	0.000470894
HIST1H2AE	1.699	0.000426215
C1orf228	1.69797	7.96672e-07
SCARNA22	1.69787	0.00367036
AARD	1.69668	0.000897233
TTC16	1.69416	1.19452e-05
MIAT	1.69132	7.70768e-06
DOPEY2	1.68264	5.52896e-11
PDE6G	1.68213	2.91174e-05
LINC00853	1.68205	3.39826e-05
HPD	1.68155	0.0181504
IFIT3	1.67953	1.9502e-05
ERMP1	1.67907	4.15616e-08
LINC00160	1.67599	0.000805963
HOTAIR	1.67455	0.0031922
CLPSL1	1.67231	0.000808948
PAQR6	1.67229	1.88111e-05
MLPH	1.67137	4.27954e-07
PTK6	1.67122	4.35799e-05
TTC36	1.66957	0.00445396
CCDC78	1.66621	4.0357e-05
H2AFJ	1.66273	6.3879e-07
OAS1	1.6585	9.85165e-05
G6PD	1.6544	1.66493e-06
AC005077.14	1.65344	0.00175783
B4GALNT3	1.65296	5.10086e-05
CACNA1I	1.65242	0.000476284
SELL	1.6524	0.00198998
C5orf46	1.64907	0.00418035
TLE6	1.64542	1.00175e-05
SPIB	1.64483	0.00215316
ENTPD8	1.64321	0.000624484
NUSAP1	1.64288	0.000437846
BAI2	1.63839	6.99488e-05
TRIM36	1.63676	0.00144597
KIFC2	1.63358	7.63106e-05
BRSK2	1.63185	0.000451334
SEMA3B	1.63075	0.000436612
FGD6	1.63	1.92736e-05
HMGB3	1.62724	5.38147e-05
CDK1	1.62247	0.000324924
RP11-456D7.1	1.61814	0.000303021
HDC	1.61805	0.000879718
CLSTN2	1.61672	7.07774e-05
SLC6A9	1.6165	9.71284e-07
TMEM63C	1.61533	3.22926e-06
AC109826.1	1.61529	0.000174015
RP11-54O7.3	1.6109	0.00028439
C15orf48	1.60453	0.00282708
PARD6B	1.59973	0.00141743
DNAAF3	1.59658	8.20162e-05
CLPSL2	1.59598	0.00818609
PGC	1.59534	0.0298817
BIK	1.59393	1.87796e-05
C1orf64	1.59286	0.00608193
CLDN9	1.58817	0.000135356
PLIN5	1.58495	0.00148986
AC090616.2	1.58463	0.000710574
QDPR	1.58328	0.000229277
TK1	1.58283	0.000184289
ZSCAN1	1.58144	0.000682045
SPEF1	1.58136	0.000338606
TPX2	1.5813	0.00085513
UCP2	1.58031	9.25584e-07
OAS3	1.57986	0.000197207
BST2	1.57873	3.29754e-05
LINC01124	1.57353	0.0159126
HIST1H2BK	1.5684	1.31085e-05
PRR15L	1.56692	4.36204e-06
PRKCB	1.56042	0.00386932
RUNDC3A	1.55996	0.015437
IGHGP	1.55984	0.00944673
CACNA1D	1.55957	0.000582862
REEP1	1.55947	2.87944e-05
DOK7	1.5549	0.00237229
S100A8	1.55244	0.00869648
CD52	1.55219	0.00011261
RP11-436H11.1	1.55146	0.000785843
SYT17	1.55141	0.000206263
ELP2	1.54516	1.26961e-07
SLC7A11	1.54349	0.00210179
SPAG1	1.54194	4.56972e-06
RP3-395M20.12	1.54153	1.35063e-05
UBXN10	1.54133	0.000756637
EME2	1.54035	2.21498e-08
RAB31	1.53568	2.19375e-05
SULT1A2	1.53561	0.000368849
RP11-496I9.1	1.53451	0.000181989
LRG1	1.53403	0.0115483
GCHFR	1.53305	9.16596e-06
BLK	1.533	0.00238738
GRIN2C	1.52902	0.000100816
CAPS	1.52786	1.095e-06
RHBG	1.52307	0.00155798
MGAT4A	1.52042	2.3845e-05
CAPN8	1.51934	0.000970707
CTD-2015H6.3	1.51685	9.2957e-07
ARTN	1.51528	0.00127676
ADAM15	1.51307	4.75063e-06
STARD10	1.51267	5.24603e-05
HSPB1	1.50387	3.61857e-05
SLC1A1	1.50259	0.00333076
HIST1H2BG	1.493	0.00677581
MIR210HG	1.49074	1.67768e-05
SAMD9	1.49048	0.000123294
CHAD	1.48985	0.0213916
ESPN	1.48934	4.16274e-05
HAGHL	1.48885	1.61503e-06
CCDC170	1.48502	3.90767e-05
ESR1	1.4848	0.00583699
BCAS4	1.4835	0.000274229
RET	1.48331	0.00577841
TBC1D10C	1.48293	4.77195e-05
RHBDL1	1.48245	1.981e-06
RP11-95D17.1	1.48094	1.62251e-06
RAMP1	1.47953	8.28757e-05
TNFAIP8L2	1.47815	0.000496626
AZU1	1.47662	0.00815611
MROH6	1.47117	7.30605e-08
TMEM132A	1.47091	7.05157e-05
RASGRP2	1.47066	5.88017e-05
RP3-455J7.4	1.47035	0.00147929
STAT1	1.46787	4.15844e-05
RPS19P3	1.46507	0.00710354
SGK3	1.46297	0.000827148
SLAMF9	1.462	0.0045232
CISD3	1.45949	1.38303e-05
SIX2	1.45908	0.0182229
CCNO	1.45676	0.000562887
EFNA3	1.45346	0.00286868
RP11-523H20.3	1.45255	0.00243893
CYP4F22	1.45115	0.0158213
CAPN13	1.44616	0.000219003
GGT1	1.44409	9.93356e-05
MKI67	1.44363	0.00497074
KB-1440D3.13	1.44325	0.00115533
IQGAP3	1.43934	0.00444863
F12	1.43613	7.30329e-05
CYP2T2P	1.43358	0.0246005
GRIK1-AS1	1.43242	0.0320185
CCL19	1.43055	0.0041505
EVL	1.42967	3.69647e-05
LASP1	1.42706	0.000259885
FOXP3	1.42583	0.00195763
PCSK6	1.42512	0.0109577
SCIMP	1.42457	0.00640617
VWA2	1.41981	0.00102256
ALCAM	1.41929	0.000378611
SULF2	1.41928	2.56629e-05
RP11-150O12.6	1.41892	0.00830453
LRRC46	1.41824	8.94725e-05
DBNDD1	1.41462	0.000433013
C1QTNF6	1.41379	6.09613e-06
WFDC2	1.41291	0.0113719
POF1B	1.4109	0.015807
HID1	1.4095	7.20805e-06
TOP2A	1.4088	0.00980098
CASP16	1.40811	0.0104185
CENPM	1.40648	0.000767995
HILPDA	1.40188	1.24322e-05
DPEP1	1.40188	0.00372011
SIGLEC15	1.39947	0.0165316
RP11-284F21.10	1.39877	0.00265412
WDR62	1.39791	1.81233e-05
CFB	1.39544	0.0108012
CORO2A	1.3947	7.45733e-08
TMEM40	1.3944	0.000967135
CTD-2319I12.1	1.38949	0.000386101
TEKT5	1.38941	0.00913549
KNDC1	1.38887	0.00530339
LRRC73	1.38695	0.000275095
PRICKLE4	1.38663	0.000533816
UBE2L6	1.38652	2.49632e-05
CCDC19	1.38518	0.00073337
SCARNA20	1.3834	0.0247947
CRAT	1.38233	0.000663617
RHOH	1.38089	0.000512962
NKD1	1.37914	0.00625624
CANT1	1.37856	5.52317e-05
C9orf152	1.37846	4.20561e-05
TYMP	1.37786	2.76294e-07
LINC00505	1.37748	0.0145805
AC008268.1	1.37134	0.0108581
RP11-196G18.22	1.37131	0.000792175
TNFRSF18	1.36923	2.7333e-05
PXMP4	1.36602	0.000431194
RN7SL832P	1.36601	0.00188446
NPW	1.36268	0.00848499
SULT2B1	1.36238	0.000379038
IRF7	1.35778	2.18741e-07
LA16c-380H5.5	1.35353	0.000346548
CTXN1	1.35121	0.00119161
REEP6	1.35107	0.000335107
AP1S1	1.35064	0.000120871
EFCC1	1.34969	0.000303519
CD48	1.34948	0.00695625
RP11-94L15.2	1.34805	0.00467769
AC009950.2	1.34783	0.00525348
BIRC7	1.34766	0.0153943
ECM1	1.34689	0.000143085
MANEAL	1.34609	0.00435008
ASF1B	1.34443	0.00100203
NPAS1	1.33753	0.00066089
SQLE	1.3374	0.000174804
CDH24	1.33597	0.0038864
PRRT3	1.33338	2.30425e-06
HIST1H2BD	1.33213	0.00285804
FOXA1	1.33027	0.000258749
RPL18AP7	1.33011	0.0352633
LCN12	1.33003	0.000558858
RP11-480I12.5	1.32883	0.000514573
GPR137B	1.32513	3.60095e-05
RTN1	1.32443	0.00845553
FAM178B	1.32202	0.0032206
CELSR2	1.32065	0.00046665
KCP	1.31982	0.000542704
DNASE1L2	1.31895	0.000129993
STEAP4	1.31852	0.00449454
LMNB1	1.31718	0.00311421
SIDT1	1.31689	5.8433e-05
BGN	1.31666	0.00315691
FBP1	1.31531	9.50095e-05
RP11-123K19.1	1.31207	0.00681325
IL1RN	1.31072	0.0228529
NLRP2	1.31019	0.0340761
ZG16B	1.30783	0.000319888
CCNB2	1.30594	0.0106702
SLC1A4	1.29984	0.00324728
IFI44	1.29896	0.00325761
CDKN2A	1.29655	0.000351366
ADM2	1.29604	0.000164601
MYBL1	1.29532	0.00941903
MYO1G	1.29468	0.000114534
VPREB3	1.29442	0.0184065
SDC1	1.29415	1.6124e-06
RAPSN	1.29338	0.00130198
SPP1	1.29307	0.0200837
GPR160	1.29282	0.000145137
KCNK6	1.28944	5.70724e-05
RP11-150O12.3	1.28799	0.0224355
RP11-120K24.5	1.28797	0.00396139
SUSD3	1.28415	0.00497463
CYP2J2	1.2836	0.00483859
PITX1	1.28354	0.0344765
HEBP1	1.28274	0.000125281
ZWINT	1.28261	0.0047878
IFI35	1.28235	0.00019572
PPP1R37	1.28119	0.000230232
GPRC5A	1.27941	0.000653581
CELSR1	1.27654	0.000205134
MAGED2	1.27609	5.43592e-05
TTC39A	1.27475	0.000751789
CTSD	1.27464	5.72837e-05
CLDN1	1.27398	0.00892623
S1PR3	1.27317	0.000548408
TMEM210	1.27205	0.00223804
OVOL1	1.27063	0.00609173
C5orf63	1.26946	2.41234e-05
C9orf116	1.26805	0.00103849
BANK1	1.26773	0.0449468
LRRC56	1.26672	5.82247e-05
IFIT2	1.26589	0.00658561
ARSG	1.26557	1.79573e-05
AGR3	1.26545	0.0415402
RAB11FIP4	1.26535	6.00186e-06
PBX3	1.26288	0.000795067
PROC	1.26287	0.00752353
SLC16A6	1.25908	0.0430622
E2F2	1.25808	0.00259511
MYB	1.25778	0.00324338
RP11-473M20.11	1.2568	0.00622551
ZNF28	1.25505	0.000464218
TSPAN15	1.25493	0.00164576
PLEKHN1	1.25411	0.000137735
PTPN7	1.254	0.000197594
FAM83H-AS1	1.253	0.000203483
PTTG1	1.25052	0.00537016
PMEPA1	1.24975	4.79082e-06
AC116614.1	1.24854	0.0184946
PRSS27	1.24846	0.00431261
VSNL1	1.24768	0.00754232
MIR3687	1.24672	0.0464061
FOXS1	1.2466	0.000316973
RAMP3	1.24604	6.27619e-05
TSPAN8	1.24596	0.0322147
SMIM22	1.24586	0.00281408
RP4-740C4.8	1.24527	0.0012247
CTB-181H17.1	1.24507	0.00991185
DNAJC12	1.24477	0.0151749
MAPT	1.24299	0.0122948
LDLRAD4	1.24056	1.56407e-06
TMC5	1.23853	0.00276858
MIR3648	1.23846	0.0291656
CCDC88C	1.23725	7.53489e-05
CTHRC1	1.23613	0.0262779
TRIM54	1.23592	0.0124145
NCDN	1.23276	0.000142839
CTD-2583A14.11	1.23191	0.000145594
SHISA9	1.22934	0.0101121
IFITM1	1.22836	0.0101459
FAIM3	1.22608	0.00142092
RGS1	1.22418	0.0042952
EMB	1.22181	0.00132908
ANO9	1.22131	8.90798e-06
SLC2A6	1.22	0.000143794
AP1S3	1.21747	0.00139328
RHPN1	1.2171	2.14646e-06
CD6	1.21682	0.00128197
CXCL14	1.21682	0.00428469
HMGN2P46	1.21643	0.0158696
CPPED1	1.21603	0.00320664
RAB26	1.21503	0.000124587
N4BP3	1.21389	4.45908e-05
ZNF385A	1.21328	0.000454837
TMEM64	1.21187	0.00269852
MMP15	1.21132	1.6392e-06
ZBTB18	1.20832	0.00608975
TRIB3	1.20787	0.00016146
PPIL2	1.20781	0.000164603
TIAM1	1.20627	0.00052672
GSTM3	1.20569	0.00197951
ZDHHC11	1.20186	0.00218584
RP11-800A3.4	1.20144	0.00305328
SLC27A4	1.2002	2.88919e-06
SLC30A4	1.19806	0.000740162
C16orf89	1.19662	0.0052246
SIAH2	1.19529	0.00682745
SH2D4A	1.19441	0.00163363
DOCK2	1.1939	0.0114792
TMC6	1.19266	2.46031e-07
SLC16A3	1.19155	2.82925e-05
ATOX1	1.19102	3.68675e-05
ABHD3	1.1895	0.00073465
KCNK1	1.18598	0.00433637
SCUBE2	1.18521	0.0235393
SNORA77	1.18406	0.0035329
HIGD1A	1.18261	0.00512868
RALGPS2	1.18238	0.00370456
S100A2	1.1811	0.0432055
KRT8	1.17952	0.000956568
C6orf141	1.17941	0.00162067
PMAIP1	1.17871	0.0135718
PRR11	1.17714	0.00681074
NQO1	1.17178	0.00565551
GPR183	1.17019	0.0498174
SLAMF6	1.16737	0.0231715
BPGM	1.16622	0.00119541
ACOT11	1.16521	0.00142462
C19orf33	1.1644	0.0250795
LAMTOR2	1.16404	9.15792e-06
SLC4A2	1.16273	0.00203939
LRRC10B	1.16223	0.0034163
ITGAL	1.15971	0.000178284
CTC-558O2.1	1.15919	0.0142585
FAM213B	1.15863	5.55928e-05
SFXN1	1.15714	6.32496e-05
DRAXIN	1.15659	0.00298691
AR	1.15656	0.000645927
RP11-465B22.3	1.15655	0.00592249
RNF213	1.15627	2.16701e-05
CTSZ	1.15486	0.0116042
PSMB3	1.15456	0.00131826
EDARADD	1.15317	0.00329754
TMEM79	1.15108	2.52183e-05
SLA2	1.14934	0.00974527
IGSF9	1.1486	0.00140099
PROM2	1.14852	3.96351e-06
KIAA1244	1.14801	0.000121154
FCER2	1.14634	0.0483569
GINS2	1.14496	0.0247702
TBC1D9	1.14454	0.00242148
TROAP	1.14451	0.0224389
RLTPR	1.14307	0.00420191
ASRGL1	1.14241	0.0109362
FBXO6	1.14202	0.000216437
CTD-3193O13.9	1.13902	0.000776519
TMEM150C	1.13869	0.00269785
EVI2A	1.13864	0.0375364
WDR65	1.13863	0.0108634
BNIPL	1.13785	0.000498621
ZAP70	1.13771	0.000905071
S1PR4	1.13607	0.00162961
GIPR	1.13586	0.0034837
IDH2	1.13457	1.40566e-05
PCSK4	1.13224	0.000343771
IL4I1	1.1312	0.000823448
PTPRC	1.13094	0.0115828
ABCA7	1.13049	1.24697e-05
HPGD	1.13035	0.0373231
SH3D21	1.1296	0.000183807
JADE3	1.12874	0.00552601
SRCIN1	1.12812	0.000408498
SERINC2	1.12699	0.000423127
RP11-147L13.2	1.12648	0.0191509
PGP	1.12467	2.70399e-05
COL8A1	1.12459	0.0150684
SEMA3F	1.12424	1.70609e-05
FYB	1.12333	0.0426575
PAFAH1B3	1.12332	2.5925e-05
FAUP1	1.11912	0.0327131
FAM159A	1.11906	0.00113921
ECT2	1.11857	0.00197579
P2RY6	1.11722	0.000513775
ATG9B	1.11447	0.000381491
DNAAF1	1.11445	0.00767536
PSTPIP1	1.10909	0.00266211
CARD14	1.10892	0.00114958
CCDC183	1.10884	2.26988e-06
ETV7	1.10806	0.0187586
FUT2	1.10701	0.00496809
OTOA	1.10676	0.0108865
MAL2	1.10563	0.00485216
BRI3BP	1.10562	1.10975e-05
SFXN5	1.10493	0.000166986
NAPSB	1.10491	0.00117361
SKAP1	1.10438	0.0131511
FAM65C	1.10213	0.00767373
SP6	1.10192	0.0102664
SRD5A3	1.10182	0.00450722
RP11-465B22.5	1.10083	0.014842
TSTA3	1.09948	1.44052e-05
DPP3	1.09751	0.000750933
LDLRAD3	1.09696	0.00140674
CTB-58E17.1	1.09659	0.000952303
IKZF1	1.09628	0.0138761
GRAP2	1.0961	0.00451752
STMN1	1.09531	0.00966129
SASH3	1.09364	0.00465155
IL7R	1.09337	0.0487832
CATSPER1	1.09333	0.0120067
HPN	1.09296	0.0146002
HIST1H2AC	1.09231	0.00496931
TFR2	1.09199	0.0168637
C9orf91	1.09171	1.64414e-05
TSPAN17	1.09072	2.36176e-07
CD22	1.0856	0.0193011
FOXO6	1.08556	0.000551739
LYPD6	1.0853	0.0432087
TNRC6C-AS1	1.08516	0.00323341
TMC8	1.08507	0.000529033
EFCAB12	1.08444	0.013313
ARHGDIB	1.08438	0.00030727
STX1A	1.08402	0.00012904
TJP3	1.08331	0.000752794
KCNS3	1.08221	0.00966482
PRLR	1.0807	0.000289853
CRIP2	1.07986	0.000196648
ARNT2	1.07906	0.00162062
FAM110A	1.07826	0.000377072
TLCD1	1.07816	0.00280637
PKM	1.07671	0.00337936
MPV17L	1.07667	0.0023299
TBC1D24	1.07638	1.54728e-05
NPC1L1	1.07583	0.0140999
C1orf216	1.07573	0.00126096
SPN	1.07568	0.00106614
MTL5	1.07514	0.002099
ADAP1	1.07474	0.000143476
ZBTB42	1.07441	0.000272476
GPR132	1.07385	0.0010782
ABCC3	1.0738	0.0040025
E2F1	1.07317	0.00227194
SPC24	1.07301	0.019789
SLC4A8	1.07282	0.0145114
RECQL4	1.07184	4.94307e-05
VAV3	1.07182	0.00141413
GRIN1	1.07116	0.00757646
LINC00884	1.06999	0.00156509
PYCRL	1.06886	0.000147203
LPCAT1	1.06863	2.70999e-05
CACFD1	1.06829	3.15229e-05
MBOAT7	1.06661	2.07926e-05
FAAH2	1.06599	0.00120877
RASSF7	1.06567	6.47392e-05
UGCG	1.06489	0.0111051
HSPB8	1.06436	0.0362531
SLC22A18	1.06344	2.01344e-05
RP11-368J21.3	1.06334	0.00980173
LINGO1	1.06264	0.0129597
VSTM2L	1.06243	0.0240853
FASN	1.06013	0.028045
ZNF185	1.06008	0.00130395
PDCD1	1.06	0.0160779
RP11-53O19.3	1.05927	0.0299664
LIMD2	1.05779	0.000123069
PREX1	1.05681	0.0199174
BAX	1.05375	0.00873087
CACNA1F	1.05291	0.00862668
SLC25A10	1.05266	3.41686e-05
TIMELESS	1.05256	0.0027562
MTFR1	1.05223	0.00353082
FMO5	1.05146	0.0136333
SCCPDH	1.0491	0.000108524
DDX60	1.04515	0.0296935
TAGLN2	1.04439	0.000140664
RP11-33I11.2	1.04145	0.00497243
LY6H	1.04016	0.0345363
CD84	1.03927	0.00113183
C15orf27	1.03865	0.0264506
SERTAD4	1.03815	0.00298184
RP11-174G6.5	1.03781	0.0060816
MMP17	1.03657	0.000476902
CARD11	1.03656	0.00268416
SPDEF	1.03469	0.00366862
CAPG	1.03405	0.000786357
AIFM3	1.03274	0.00117401
PTPLAD1	1.03105	0.000956385
ATP6V0B	1.03017	1.62449e-05
CENPP	1.02841	0.0153832
CYB561	1.02835	0.000523878
LBX2-AS1	1.02801	0.00806658
POU2F2	1.02795	0.00179072
LYPD6B	1.02783	0.049008
PITPNM1	1.02782	0.000162471
FA2H	1.02673	0.0444527
TPRN	1.02634	0.000166641
KRT18	1.02377	0.012658
LMX1B	1.02308	0.00107572
C5AR2	1.02291	0.0130685
PIGQ	1.02086	2.71278e-05
CD5	1.02068	0.00778245
RTP4	1.02047	0.00607933
LLGL2	1.01967	0.000473949
NOX4	1.01878	0.0400076
MSX2	1.01735	0.00637808
NAGS	1.01733	0.0155091
SULF1	1.01602	0.0069945
PAAF1	1.01437	0.0056342
ZNF587	1.01296	8.25609e-05
CCDC40	1.01274	0.00167245
RP5-882C2.2	1.01132	0.00334382
RSPH1	1.01052	0.0107969
MESP2	1.0104	0.0160735
BLVRA	1.00997	0.000634421
SAMD9L	1.00891	0.0244466
CD37	1.00889	0.00281068
LINC00263	1.00725	0.0164082
LINC00277	1.00636	0.0489895
SYK	1.00606	0.000788669
Z73979.1	1.00533	0.0454571
FAM174B	1.00485	0.00210682
ABHD11	1.00435	0.000571384
CYB5A	1.00248	0.00160051
GEN1	1.00231	0.0206044
PCDH1	1.00127	0.000106507
ASAH1	1.00127	0.00147986
BLNK	0.999228	0.0320235
GGCT	0.999131	0.00163143
PLEKHF2	0.998077	0.00546161
PRSS23	0.99625	0.0349355
MARVELD2	0.996174	0.00199055
MFHAS1	0.995897	0.0292409
ITGB2	0.995472	0.00731938
SIGIRR	0.995419	1.03754e-05
ABCG1	0.992046	0.00257484
TMEM63B	0.991908	0.000479218
ACP5	0.99185	0.00844656
CABP4	0.991331	0.0146778
S100A16	0.991157	0.00449429
MARVELD3	0.990545	0.00100522
MRPS7	0.990144	0.00164913
PSMD3	0.989987	0.000667013
GAPT	0.987717	0.0224704
CTNND2	0.987183	0.04302
PRDX1	0.987057	0.00160619
ARL11	0.98686	0.0332096
RASAL3	0.986178	0.000252797
PIK3R3	0.986065	0.00198891
MYH14	0.985393	0.0158123
IL17RB	0.985098	0.0363821
ENTPD5	0.983687	0.0261093
FUNDC1	0.982194	0.00833611
CTA-360L10.1	0.982189	0.0448302
GREB1	0.982184	0.01655
C14orf64	0.981851	0.0155319
C14orf80	0.981846	0.0229847
RNF208	0.981805	0.000161986
CERS6	0.980853	0.0102048
KIF2C	0.980616	0.0473952
POC1A	0.978398	0.0050225
HTATIP2	0.977365	0.00161834
KLHDC7B	0.977285	0.0224897
KCNC3	0.977259	0.0216099
RP11-465N4.4	0.977046	0.0109193
FAM221B	0.976233	0.0371225
ULK4	0.975847	0.00349921
SBK1	0.974909	0.00872081
RP11-307C12.11	0.974741	0.00297921
ZNF467	0.973879	0.000171439
ACTL10	0.973875	0.00775136
CD7	0.973594	0.00528933
SDF2L1	0.973581	0.00010083
FPR3	0.972387	0.0362097
CD79B	0.970136	0.00613586
TP53INP1	0.968601	0.00705846
CBR3-AS1	0.967096	0.0125279
CCDC167	0.966632	0.000257861
CCNF	0.965218	0.000658147
ATHL1	0.965125	0.0219093
HN1	0.963936	0.000810579
RP13-516M14.2	0.96386	0.00708261
MEX3A	0.962748	0.00683351
SOGA2	0.962336	0.0247349
MYO5B	0.962269	0.00161714
C16orf59	0.961027	0.00324724
TMEM241	0.960331	0.00188106
DDX58	0.959045	0.000504389
PCBD2	0.95862	0.00232558
ARHGEF16	0.958168	9.89158e-05
TMEM254	0.956237	0.000331159
TMEM8A	0.955019	1.15469e-07
CDKN2B	0.954462	0.0256087
SLC26A1	0.953366	0.0174623
SMPD4	0.952407	0.0287583
TMEM74B	0.952229	0.00753812
TMED3	0.951499	0.00357743
GTSE1	0.949965	0.0272383
CTD-2619J13.8	0.94915	0.0411301
VOPP1	0.946625	0.00616754
P2RY2	0.946283	0.0120179
CEACAM21	0.945999	0.010683
IER5L	0.945396	0.00985854
CCDC125	0.945114	0.000461127
CD2	0.943608	0.0193022
TMEM145	0.941413	0.0409332
C6orf211	0.940949	0.0230145
CRB3	0.94092	0.012099
FLAD1	0.940474	9.82186e-06
ADAM8	0.940446	0.00916888
KRTAP5-10	0.939717	0.0255621
RP5-1065J22.8	0.93927	0.00480791
ENO4	0.938244	0.00718209
FBXO36	0.938025	0.00639728
SLC50A1	0.937742	0.000568804
CERS4	0.936165	0.001758
ALDH4A1	0.934968	0.000491628
FAH	0.93454	0.00157721
SLC39A11	0.931043	0.000252538
MAPK13	0.930802	0.00142647
TRIM14	0.929647	0.00325463
CAMK1D	0.929252	0.0194522
CIITA	0.928987	0.00207776
STRA13	0.927987	0.00644091
ASIC3	0.926819	0.00191578
TACC3	0.926333	0.00552075
SMIM5	0.925844	0.00877478
MST1R	0.925451	0.000933973
IL18	0.924892	0.0139941
CREB3L4	0.924724	0.0044529
MEGF6	0.924498	0.0423756
ARHGDIA	0.923716	0.0275551
RRP36	0.923628	0.00192629
APOLD1	0.923443	0.000944866
DNAH14	0.923324	0.00987434
DFNB31	0.922944	0.00391933
ZNF552	0.922668	0.00174793
CNFN	0.922086	0.0105418
ARHGAP30	0.921802	0.000766618
SLC52A3	0.921101	0.00915669
CTD-2210P24.4	0.920599	0.0437304
PLGRKT	0.920569	0.00498016
QPRT	0.9202	0.0262421
NDUFS2	0.919884	0.00115764
ABHD2	0.919448	0.00366657
KRT19	0.918863	0.00560776
TMEM110	0.918616	0.000656263
FAAH	0.918603	0.000692231
SCO2	0.918021	0.000320225
TRIM24	0.91769	0.00341891
MED1	0.915525	0.00117212
ST3GAL1	0.915188	0.000461569
SLC41A2	0.915166	0.0368736
TMEM54	0.915056	0.00176823
CIB1	0.914698	0.00118755
SGPL1	0.914665	0.000168606
AQP3	0.914305	0.0268617
GSDMB	0.913423	0.0254771
KLHL35	0.912767	0.00287218
MAST4	0.912648	0.00038182
HPCAL1	0.911836	0.015353
SIT1	0.911061	0.0149849
SDSL	0.911052	0.00144175
HERC6	0.910719	0.0105173
BAK1	0.910406	0.00473277
AC006547.13	0.909615	0.01068
C2orf72	0.90711	0.0340041
TMEM191A	0.906858	0.0044883
LEF1	0.906081	0.0380056
GPC1	0.905504	1.55335e-05
ANO7P1	0.905427	0.0212625
STRBP	0.905002	0.00396068
MFSD7	0.902858	0.0149338
EXOC3L4	0.900216	0.043453
LRRC59	0.899785	0.000639075
SPPL2A	0.899508	0.0282777
XBP1	0.899378	0.0153534
AKR1A1	0.899349	0.0022499
ZDHHC24	0.89875	0.000149246
WDR24	0.897906	0.000268341
DUSP18	0.89757	0.000570922
LINC00672	0.897071	0.0359372
RN7SL180P	0.895678	0.0402262
RHOC	0.895591	0.000222884
LINC01137	0.895519	0.00689988
CYB561D2	0.89527	0.00507829
FAM195A	0.895098	0.00329576
TMEM141	0.892989	0.00181488
LCP1	0.891952	0.0251306
PRR19	0.891417	0.00588824
PCDH17	0.891104	0.00505356
CLDN7	0.890735	0.000436584
CXCR3	0.889818	0.0485287
COMTD1	0.889188	0.00105593
AMDHD2	0.888386	0.00120183
RIPK3	0.887961	0.00171696
GALE	0.887689	0.00533443
SYNGR2	0.887276	0.00360647
ARHGAP39	0.886289	0.00120299
RAB37	0.884716	0.000839847
IQCD	0.884179	0.0212951
FAM83H	0.884098	0.000272309
CELSR3	0.881761	0.00396078
CYB561A3	0.880583	0.009119
OAZ3	0.879977	0.0177375
STXBP2	0.879722	0.00257091
SPR	0.879207	0.00902081
C17orf62	0.879154	3.00591e-06
EPT1	0.878996	0.000783648
SIL1	0.878053	0.000150214
RP11-902B17.1	0.876682	0.0374446
RP11-432J24.2	0.876447	0.0138599
FAM45A	0.875731	0.00126278
SPOPL	0.875443	0.00740014
PCGF2	0.873727	0.0195951
BAG1	0.873449	0.0163834
DNASE1L1	0.872907	0.0261932
C18orf32	0.872622	0.0132764
ZNF296	0.872473	0.00269174
SYTL2	0.871986	0.014193
C2ORF15	0.871062	0.0433779
C11orf48	0.869785	0.0444113
ADIPOR2	0.869531	0.00163559
TSTD1	0.868702	0.0350538
EPHA10	0.868532	0.006432
VANGL1	0.867801	0.00431919
KIF21B	0.867334	0.0260714
DNALI1	0.866812	0.0276541
SFXN2	0.866189	0.0105678
MCCC2	0.866106	0.0196739
USP35	0.865669	0.0059236
PPP1R26-AS1	0.863443	0.0286355
VTCN1	0.863439	0.0462996
TMEM154	0.863256	0.0119977
PQLC3	0.861528	0.00968127
RP11-889L3.4	0.859893	0.00409289
SEPHS2	0.859747	0.00572037
TTLL12	0.8594	0.0103353
BAMBI	0.85906	0.0201001
INF2	0.858581	6.91669e-05
EVPL	0.858215	0.00293171
RAB3IP	0.856768	0.0123322
ACOT2	0.855551	0.000327082
MDK	0.855398	0.0108233
PRSS8	0.855096	0.0398202
COMMD7	0.855023	0.000509291
PKP3	0.854621	0.00313457
OBFC1	0.854211	0.0185794
CCDC81	0.853331	0.0291843
MAD2L1	0.853049	0.0288897
GMIP	0.850075	4.12398e-05
MYEOV2	0.850057	0.0465789
TRBC2	0.850057	0.0355275
SLC26A6	0.848694	0.000378727
DENND2D	0.848439	0.0216246
P4HB	0.847601	0.00774978
LGALS8	0.845243	0.0019299
PDIA4	0.841851	0.00014494
NPTXR	0.841582	0.00639684
AGRN	0.841486	0.0249689
HN1L	0.841429	0.000326501
UQCC2	0.840767	0.00175708
DHTKD1	0.839859	0.000448802
CIT	0.839692	0.0363309
SH3BP5L	0.839623	0.0041159
ERBB3	0.839025	0.00172253
PDLIM1	0.837814	0.0108269
ABAT	0.837561	0.00875229
PYCARD	0.837148	0.00261988
ATP13A2	0.836331	0.000497442
CAP2	0.836276	0.0479813
PYY2	0.836158	0.0142877
SEZ6L2	0.836128	0.0227138
DACH1	0.835566	0.0464618
LPGAT1	0.835217	0.000446079
MEGF9	0.833462	0.00205214
C2orf68	0.832643	0.000514508
CTD-2555A7.2	0.831952	0.0174803
REC8	0.831146	0.0174003
GPC2	0.830617	0.0494122
NACC1	0.829509	0.0329491
C1orf233	0.829421	0.00990081
SNRNP25	0.829353	0.00231114
LYPD3	0.829194	0.0470904
SSPO	0.828109	0.00104178
EML2	0.827387	0.0153592
TTLL9	0.827212	0.0278683
UQCRQ	0.826746	0.000965285
GRHL2	0.826697	0.00105604
HLCS	0.826497	3.70938e-05
CST7	0.826263	0.0127218
TMEM229B	0.826005	0.00623105
XXbac-B135H6.15	0.825582	0.0370261
INPP4B	0.824532	0.0201937
ACSF2	0.823688	0.00198822
CRABP2	0.82341	0.0416458
ESRP1	0.822808	0.0146294
ZMPSTE24	0.822686	0.00261185
EZR	0.821165	0.00323794
YIPF1	0.820363	0.000650914
FAM107B	0.820015	0.0386697
NUDT16L1	0.819645	0.000706049
C19orf18	0.819473	0.00939421
ZNRF2	0.818676	0.0187448
FBXO41	0.818414	0.000229893
FSCN2	0.817313	0.0268965
CA12	0.817107	0.0255449
SHB	0.816605	0.000495526
MAP4K1	0.816101	0.0102002
TST	0.815925	0.0136697
UHRF1BP1	0.815728	0.0203527
PGD	0.815174	0.00179576
PAPSS2	0.815029	0.0195034
IFIH1	0.813701	0.0482861
BCAM	0.81229	0.0207158
SLC38A1	0.812179	0.0115168
PTPRCAP	0.811609	0.00490819
KIAA0319L	0.811578	9.2376e-06
LRBA	0.811479	0.000135125
BATF	0.810279	0.0208929
KIAA1211L	0.810252	0.0198069
JAK3	0.810068	0.0115847
RUNDC1	0.808504	0.000894136
OTUB2	0.808484	0.0090179
SPINT2	0.807321	0.00111579
SECTM1	0.806223	0.00635373
MTCH2	0.805961	0.0101469
PHLDA2	0.804293	0.0204019
NPNT	0.804071	0.0232823
RTN4RL1	0.803346	0.0293915
Y_RNA	0.803137	0.0349173
ATP6AP1	0.802748	0.00145293
F11R	0.802458	0.000792553
RP11-505K9.1	0.801704	0.0476281
SLC7A6	0.801328	0.0258586
RABL6	0.800539	3.48239e-05
ENC1	0.80036	0.0216209
INTS7	0.800256	0.00247915
RABEP2	0.799801	0.000373197
ACAP1	0.798834	0.00209375
ESRP2	0.798687	0.00266661
MTHFD2	0.798221	0.00196711
SLC2A10	0.798214	0.00546255
ORAI2	0.79814	0.000923367
HMHA1	0.797596	0.00222331
CYBB	0.797412	0.0366821
RGS3	0.796821	0.0321587
ACE	0.796083	0.0125138
C4orf48	0.795884	0.00399671
GEMIN7	0.795457	0.000129764
DTX2	0.795232	0.000404831
GGPS1	0.793748	0.00231382
ZDHHC12	0.792747	0.00187073
PGM2L1	0.792339	0.0232347
PRKACB	0.791502	0.0274756
ABCB8	0.791382	0.000356742
SHROOM2	0.79072	0.0151682
BLVRB	0.790609	0.00480724
SAMD10	0.790249	0.00602395
IRF5	0.790187	0.0126207
ENPP1	0.790187	0.0120386
KIAA1841	0.790029	0.00473578
FAM173A	0.789831	0.00211671
FZD8	0.78934	0.023361
MRPS34	0.789167	0.00434203
RFX5	0.789092	0.00558611
ADAT1	0.788127	0.0116511
ABCD1	0.787894	0.00242063
C17orf96	0.787683	0.0316648
ORMDL3	0.786493	0.0199965
GRTP1	0.786456	0.0228685
TGFB1	0.785082	0.0125918
EGLN3	0.78454	0.0409707
PSENEN	0.783283	0.0163964
RUSC1-AS1	0.782338	0.00710502
SUSD2	0.781999	0.0441193
FAM162A	0.781637	0.00974698
PPP1CA	0.781615	0.0162266
FAM102A	0.781267	0.00184501
SLC2A1	0.781074	0.00419242
NHLRC2	0.780998	0.00975165
PAK6	0.780687	0.0373127
RHBDD2	0.779736	0.0011003
LINC00926	0.779378	0.0249174
KDM4B	0.779288	0.0213419
KIAA1522	0.779133	0.00131974
SEC22B	0.778393	0.00219061
RALGPS1	0.778199	0.000865682
hsa-mir-1199	0.777574	0.0138021
FAM63A	0.776833	0.0179201
IL10RA	0.776579	0.0329068
IMPDH1	0.776322	0.00228733
MRPL41	0.775209	0.000169377
ATP6V1G1	0.774804	0.0328045
FHDC1	0.774596	0.0150085
AFMID	0.77456	0.00700191
CECR1	0.774418	0.044567
AK8	0.773631	0.0287377
NAPRT1	0.773273	0.00349368
GLE1	0.773087	0.0036486
MARCKSL1	0.772807	0.00539511
TMUB1	0.77221	0.000203043
GALNT6	0.771077	0.0446786
MRPS16	0.770943	0.000632516
CD72	0.770299	0.00868626
YJEFN3	0.770088	0.00832648
PTPN6	0.769685	0.000605953
MAGI3	0.769404	0.007529
MSI2	0.76788	0.00265596
FLNB	0.767726	0.0224054
NDE1	0.767637	0.0340975
TSPAN13	0.767069	0.0341305
NME1	0.767059	0.00304624
NECAB3	0.766828	0.00211457
EMP2	0.766438	7.68108e-05
NEAT1	0.766185	0.0122886
RAC3	0.765856	0.02004
VPS37C	0.765087	0.00206404
PON2	0.764997	0.0429712
CHML	0.764723	0.0460398
CBLC	0.764122	0.0162437
SAPCD2	0.762858	0.0307232
FPGT	0.762687	0.0167994
ISOC1	0.762435	0.0264224
STAT2	0.76191	0.0298295
TMC4	0.761392	0.020911
SCAND1	0.760117	0.0022375
RP11-452L6.5	0.760048	0.00749583
H2AFY	0.760029	0.000247455
PVRL2	0.759199	0.00389643
UFSP1	0.758261	0.020425
FUT8	0.757667	0.021212
SRP9	0.757666	0.0298605
SCNN1A	0.757493	0.0265818
SRRM3	0.756768	0.016903
PDLIM5	0.755865	0.00141662
LMAN2	0.755251	0.00122793
RP13-582O9.7	0.754163	0.0416052
NEK6	0.753792	0.00163221
HMGA1P4	0.753429	0.047318
PARP12	0.753032	0.00197078
TTC39C	0.752298	0.00199073
LRWD1	0.751512	0.00285852
ZNF626	0.750923	0.00487845
INHBB	0.750044	0.0428848
ARRDC1	0.748156	0.00338074
RBM47	0.747231	0.00697134
VAMP8	0.746217	0.00799109
REEP4	0.745687	0.00696912
FAM211B	0.744064	0.0012379
SMIM12	0.743966	0.000656556
RP11-212P7.2	0.741566	0.00213399
ARHGEF3	0.74096	0.0285873
GDPD1	0.740891	0.0371358
CCND1	0.739989	0.0161791
WDR34	0.739695	0.00251857
SNX30	0.739617	0.0104318
VRK2	0.739364	0.0264716
IFT122	0.738523	0.00184885
PODXL2	0.738014	0.0361916
ORMDL2	0.737837	0.0267073
TLR9	0.737824	0.0457922
MIR4435-1HG	0.737787	0.0459527
AL022341.3	0.737678	0.0358916
UGGT1	0.737468	0.0005757
DHCR7	0.737291	0.0453192
SNAI3	0.737032	0.0220626
GNAO1	0.736933	0.0494936
GDE1	0.73675	0.00459147
TTC9	0.736072	0.0108916
ATF5	0.735504	0.000787852
CDK5	0.734345	0.0060073
GFER	0.733406	0.00136308
PHPT1	0.733279	0.000964194
RP11-455F5.3	0.732568	0.0434634
NUDT18	0.7323	0.00446973
U73166.2	0.731564	0.0241316
SAMD14	0.731428	0.0259035
BRCA1	0.731268	0.019805
RP11-175O19.4	0.73044	0.0257713
SLC37A1	0.729755	0.00381169
FAM227A	0.72943	0.0203956
YIF1B	0.72768	0.000968551
ARPC1B	0.726408	5.02209e-05
AC009237.8	0.725848	0.033297
LCLAT1	0.724971	0.0326002
SMUG1	0.724308	0.00655695
MGAT5	0.723972	0.0224148
SIPA1L3	0.723461	0.0170001
DCAF10	0.723285	0.0104151
RP11-629O1.2	0.72299	0.00873821
KLHDC9	0.722839	0.0350598
RP11-395P17.3	0.722828	0.0417184
RANGAP1	0.722494	0.000828997
PPP2R4	0.722189	0.00409189
PARD6A	0.721692	0.0426595
MAGIX	0.721598	0.0224365
DCTPP1	0.720781	0.00267212
SYTL4	0.720734	0.0114401
TRIM38	0.720244	0.0104967
CDH1	0.71977	0.0213596
ASPSCR1	0.719614	0.000148598
ARHGAP4	0.719555	0.00179095
GPR137	0.71736	0.000359893
UHMK1	0.717257	0.00723534
CCDC159	0.716987	0.000363082
PPP6R1	0.716852	0.0221813
UVSSA	0.716022	0.00797829
SLC19A1	0.715553	0.00093428
ZNF598	0.715291	0.0490607
PARP9	0.713875	0.00850052
GFPT1	0.713535	0.0197798
CYTH4	0.713144	0.0252366
FAM84B	0.713029	0.0332656
GAPVD1	0.713004	0.00457015
RGS11	0.712991	0.0483041
FAHD1	0.711452	0.00424834
AGPAT3	0.708586	3.42346e-05
AP1M2	0.70777	0.0193344
ARSD	0.707583	0.0297083
PTP4A2	0.707384	0.0134143
CHMP4B	0.707185	0.0144227
UFD1L	0.707083	0.00141149
CCDC24	0.706469	0.00490541
TTLL5	0.706071	0.00651288
TTC31	0.705464	0.01645
SAMD12	0.705038	0.0478274
TMSB10	0.705017	0.0280534
NUCB2	0.703908	0.0136685
STIP1	0.703582	0.000408909
COA6	0.703232	0.0419928
INHA	0.703047	0.0364739
NKG7	0.701503	0.0401468
ARHGAP32	0.701436	0.00184245
PPDPF	0.701337	0.0118022
POLR3K	0.701328	0.0226398
ARSB	0.700988	0.0433101
SPHK2	0.700876	0.0247652
OTUD7B	0.700758	0.000283925
NCKAP1L	0.700408	0.0270087
TNPO3	0.699985	0.00684187
KCTD17	0.698982	0.000543104
SLC52A2	0.698973	0.000284049
TONSL	0.698742	0.00260387
FAM104A	0.698695	0.00797775
UNC93B1	0.697915	0.00612844
ZNF205	0.697305	0.049055
IL32	0.696888	0.0267587
ALDOA	0.695588	0.0246078
SLC25A22	0.6954	0.00400795
TDRD7	0.693602	0.0446379
ANKDD1A	0.693601	0.00586601
CCDC134	0.693506	0.0207896
SUZ12P	0.693041	0.0300578
NADK	0.693009	0.00424228
CRIPAK	0.692968	0.021038
PPFIBP2	0.692719	0.0443744
ATP2C2	0.690931	0.0234097
ACP2	0.690847	0.00424787
HDAC11	0.6908	0.0136082
LIMK1	0.689783	0.00204512
REEP5	0.689633	0.006991
TMEM19	0.687887	0.00741455
RRN3P3	0.687036	0.0266308
TM6SF1	0.686942	0.0213438
POMT2	0.686803	0.00190632
CHCHD2	0.686613	0.0230836
ECE2	0.686593	0.0110442
PVRL4	0.686514	0.0361853
RAB11FIP1	0.686115	0.0476106
CASZ1	0.68553	0.0118554
SYMPK	0.685221	0.00401341
APMAP	0.684681	0.0027685
SMAD1	0.68411	0.0486521
CHPF	0.68398	0.00201455
PCK2	0.683778	0.0135314
PRKCD	0.683025	0.00440304
SERP1	0.682825	0.00936004
C3orf14	0.681012	0.0333925
TXNDC17	0.680687	0.0244165
TMED8	0.680336	0.0296915
ABCA3	0.680212	0.0303706
RAB3D	0.678677	0.0021642
ENPP4	0.67858	0.0338132
LAPTM5	0.677788	0.012751
KIAA1598	0.677648	0.0462179
BLOC1S2	0.676997	0.0408651
UCN	0.676801	0.0186451
KIF22	0.676422	0.00684581
CEP70	0.676251	0.0114756
PPCS	0.674467	0.0446982
BSPRY	0.673743	0.0366104
SH2B2	0.673656	0.00768231
AMICA1	0.673002	0.0356188
CYFIP2	0.672921	0.0107664
PEX13	0.672877	0.0193658
NDUFS8	0.671997	0.00814298
MYO6	0.671849	0.0074698
SQRDL	0.671304	0.0326571
OXLD1	0.671243	0.0202474
TMPRSS13	0.670351	0.0387885
DPP7	0.669406	0.00290467
CEP104	0.669169	0.000197122
SORT1	0.669095	0.00201294
CORO7	0.668765	0.000456856
SOX12	0.668672	0.00218563
AAGAB	0.668358	0.00449975
FBXL8	0.667584	0.0470499
TMEM184B	0.667312	0.0092059
SYAP1	0.666524	0.00692927
RNPEPL1	0.665492	0.000711998
RNF103	0.665207	0.0454822
ARMC7	0.665	0.000934735
SHKBP1	0.664885	0.004895
DNAJC3-AS1	0.664452	0.049612
C1orf170	0.663755	0.020153
WHSC1	0.663554	0.00300176
PCYT2	0.663367	0.00137723
CBX4	0.662778	0.0175972
ABRACL	0.661614	0.0200234
VEGFA	0.661423	0.00769237
PNKP	0.660629	0.0010734
TMEM160	0.659922	0.00411203
ENSA	0.658934	0.0141824
MICALL2	0.658375	0.00335179
ZNF107	0.657476	0.0300515
NME3	0.656521	0.00261846
SMIM14	0.656211	0.0114128
TMEM87B	0.654888	0.00607118
TP53I11	0.65464	0.0443306
AGTRAP	0.654478	0.00541481
PTPN1	0.65411	0.00527185
ZNF703	0.653384	0.0416742
FBXL19	0.653191	0.00439638
TMEM189	0.652299	0.00569211
EMC9	0.652103	0.00370815
FOXP4	0.651502	0.0155717
GPR157	0.651163	0.0185885
CCDC6	0.650399	0.0431746
CTD-2666L21.3	0.650128	0.0262378
DNAJA4	0.649982	0.0182677
ASB13	0.649613	0.0190479
LRRC45	0.649484	0.0078687
AMFR	0.649383	0.0169476
LRRFIP1	0.648515	0.00885531
TANGO2	0.648443	0.0138295
RP11-429J17.2	0.648385	0.00830115
TXN	0.648241	0.0228216
PEA15	0.646927	0.0114585
TMEM104	0.64651	0.0064103
SPINT1	0.646061	0.0305767
C6orf1	0.645902	0.020167
TLE3	0.644852	0.0275628
MIR940	0.644721	0.00252164
ABCD3	0.644239	0.0196378
BTBD9	0.644152	0.00331166
NLRC5	0.644059	0.0341879
CCDC157	0.643062	0.0168599
ST6GALNAC4	0.642361	0.0192972
APOBR	0.641162	0.0378897
MFSD3	0.640932	0.0314888
PTER	0.640917	0.0126817
EPPK1	0.640404	0.0434291
FBXW5	0.639941	0.00174409
ADAR	0.639866	0.00304275
DLG1	0.639738	0.0375559
TELO2	0.639201	0.00350222
ISOC2	0.638337	0.00155867
BUB3	0.637118	0.0414448
AP2S1	0.637104	0.00741583
GALNT10	0.636531	0.00649448
EXOC3L2	0.635871	0.0268581
EFCAB4A	0.63558	0.0205627
COA3	0.635509	0.0089566
ZNF428	0.635122	0.0109404
P4HA1	0.634067	0.0317782
SLC25A45	0.633848	0.011889
DHX58	0.633832	0.0314107
GUCD1	0.631547	0.0266582
C17orf70	0.631531	0.00126072
CD44	0.631437	0.018506
PRR7	0.631378	0.0263605
PDK3	0.631302	0.0292105
NANS	0.6304	0.0130967
B4GALNT4	0.630142	0.0284185
CERS2	0.62968	0.0203387
PRRG4	0.627559	0.0109745
EPHA1	0.627416	0.0136003
LRRC1	0.627265	0.000683877
HDAC10	0.627208	0.0172072
CLPB	0.626803	0.0283435
RP11-47A8.5	0.626333	0.0162225
ZNF687	0.626202	0.018986
LYPLA2	0.625309	0.011353
IQCK	0.625305	0.0411309
JOSD2	0.625183	0.00790272
ERGIC1	0.624073	0.00750227
ATP8B1	0.623999	0.0181395
LRSAM1	0.623301	0.003584
AMZ2	0.622368	0.048183
KMT2E-AS1	0.621917	0.0216693
CTPS2	0.621714	0.0496746
ROGDI	0.62142	0.0161896
MED18	0.620888	0.04069
PRRG2	0.620534	0.015699
POLR2L	0.620458	0.0335823
DCXR	0.620412	0.0425008
HSD3B7	0.620058	0.018706
GTF2IRD1	0.619889	0.00129001
ZMYND19	0.61923	0.00786207
APOA1BP	0.618177	0.0470246
NUP210	0.617941	0.00420348
CHDH	0.61708	0.0411999
EVA1B	0.616466	0.029487
CNIH2	0.615546	0.0343614
PPM1H	0.614372	0.0413947
NOL10	0.614371	0.0170005
MICAL1	0.612048	0.00330764
LGALS3BP	0.611198	0.0103747
MCM8	0.610986	0.0356141
C5orf22	0.609372	0.0498857
GGCX	0.607831	0.000546031
DVL3	0.606744	0.00352238
POLR2K	0.604417	0.0276784
ANKRD9	0.603407	0.0342327
LTB4R	0.603312	0.0162473
HCN3	0.602163	0.0244921
G6PC3	0.602037	0.0127652
STX3	0.602017	0.00868387
CNDP2	0.60149	0.0110341
HOOK1	0.601307	0.0426096
ADIPOR1	0.600993	0.00644854
WDR55	0.600982	0.00887326
RP11-268J15.5	0.600184	0.0409036
SRRM2-AS1	0.600179	0.0264548
MRPL19	0.600143	0.0210238
RPN2	0.599156	0.0131215
CLN3	0.598913	0.0497618
ACOT7	0.596324	0.026045
PWWP2B	0.595941	0.030995
IGSF3	0.594733	0.0440626
ARSA	0.59448	0.0061622
SLC31A1	0.593282	0.00717693
PAK1	0.593197	0.0140216
PYGO2	0.592079	0.0233889
HDGF	0.590726	0.000985981
ARL8B	0.588906	0.02623
RREB1	0.588319	0.00415864
CDC42SE1	0.588247	0.0366725
CAP1	0.587921	0.0333292
PAIP2	0.587041	0.0259527
DECR2	0.58681	0.0196849
TCEA3	0.586285	0.0330412
P2RX7	0.585671	0.0394961
C11orf35	0.585406	0.0478605
BCL9	0.58455	0.0339369
PHKG2	0.584004	0.00336692
AFTPH	0.583252	0.0269368
LINC00963	0.58242	0.00142784
NDUFA3	0.582165	0.0471684
CLASRP	0.581939	0.0391049
REPIN1	0.581712	0.00745795
PARP10	0.58072	0.0331079
CACNB3	0.580289	0.0295918
PPIP5K1	0.579349	0.0342786
ANXA2	0.579285	0.00543065
BOK	0.578725	0.020957
HELZ2	0.577944	0.041328
LRRC27	0.577448	0.0424841
RHBDD3	0.577365	0.00330725
VPS18	0.57697	0.0011897
SLC25A29	0.576397	0.0460205
PCYT1A	0.576025	0.00552476
HNRNPUL2	0.574876	0.0197974
SPATA33	0.57459	0.0210136
NVL	0.574212	0.0290972
LSM4	0.573953	0.0443798
RBBP8NL	0.573927	0.0412158
NMRAL1	0.573807	0.00749422
DDAH1	0.573436	0.039066
CHCHD1	0.573184	0.0253185
FIG4	0.572747	0.0387041
ZNF668	0.572345	0.0127151
TMEM63A	0.571468	0.014245
ZNF768	0.571287	0.0164562
RCC1	0.570558	0.0156181
JTB	0.570261	0.0229079
AF127936.7	0.569934	0.0450443
NPLOC4	0.569492	0.00979668
EIF2AK2	0.568662	0.0332263
CDK16	0.568357	0.00141585
METTL8	0.568221	0.040221
ARFIP2	0.56794	0.0397818
PQLC2	0.567688	0.00322556
NUDT14	0.567634	0.0312785
IQSEC2	0.567525	0.000905437
LAT2	0.567505	0.0403228
CNIH4	0.567082	0.0175819
ODF2	0.566713	0.000631822
WFS1	0.566688	0.0170311
ARPC3	0.566513	0.0132053
AGPAT5	0.566212	0.0421559
EMC10	0.565581	0.0473545
TRPM4	0.565327	0.0129701
PCBD1	0.565047	0.0324965
HM13	0.564586	0.0407515
PRKAG1	0.563859	0.0122975
DDI2	0.563731	0.0242575
CTNNBIP1	0.563534	0.0154665
GSR	0.563246	0.0499993
AAK1	0.563183	0.0391177
TMEM41B	0.56275	0.0406179
UQCR10	0.562055	0.0399302
TRAPPC9	0.561908	0.0179876
AKT1S1	0.561436	0.00864123
PARP1	0.561092	0.00980309
VSIG10	0.559291	0.040829
METTL12	0.559209	0.0447578
POLN	0.558348	0.0406573
TRAF2	0.557922	0.0118164
CD9	0.55724	0.0471774
BAIAP2	0.557121	0.0244737
ICAM3	0.557021	0.0136815
KIAA1279	0.556816	0.0242336
GOLGA2	0.555833	0.025009
XKR8	0.554857	0.0174155
NDUFA5	0.554621	0.00688953
ACRBP	0.553846	0.0442974
ICT1	0.553328	0.0286571
SLC35E3	0.551264	0.0124783
PPP1R3B	0.551146	0.0237644
LRRC23	0.550819	0.0277924
RPAP2	0.550596	0.0295916
ATP5E	0.550123	0.0136495
RDH11	0.549272	0.0379538
TRIM62	0.549218	0.0438579
FASTK	0.548564	0.00553904
CXXC5	0.548466	0.02148
ZFYVE19	0.547752	0.00483363
VWA1	0.546744	0.0189812
KDM5B	0.546277	0.0148496
PASK	0.545807	0.0222438
TBC1D16	0.54502	0.00254724
MCM4	0.544831	0.0101779
SLC39A9	0.544464	0.0122234
GPS1	0.544332	0.00428226
MED25	0.544232	0.0255097
ARF3	0.54411	0.021049
INSIG1	0.543514	0.0246631
STYXL1	0.542722	0.0288855
EFHD2	0.542212	0.00875491
ARHGEF2	0.541736	0.0146202
MSL1	0.539707	0.0396057
SLC25A1	0.538697	0.0336683
C9orf142	0.537385	0.0142897
TRPM2	0.537034	0.0389981
EBP	0.536441	0.0194229
MAP3K10	0.536401	0.0414027
AURKAIP1	0.536326	0.0217334
RER1	0.536201	0.0150976
ANP32A	0.534816	0.0329979
ALAD	0.534706	0.00615067
PPP2R5A	0.534194	0.0402707
UBE2M	0.53221	0.00999459
DOLK	0.531843	0.0225935
RNF25	0.531599	0.0252757
PGAP2	0.531586	0.0150582
RAB13	0.53075	0.0364869
CAPN1	0.529501	0.00158642
RAB18	0.528862	0.0418752
DOK3	0.52858	0.0338201
SHARPIN	0.527916	0.0155355
IFT140	0.527539	0.0362914
NINJ1	0.527458	0.0470854
PTGR1	0.527422	0.0200554
MAPK11	0.527255	0.049576
GPR107	0.527118	0.0030241
YDJC	0.525644	0.030446
ATAD3A	0.525618	0.0216573
SNAP29	0.524405	0.00955664
ACTR1A	0.524191	0.0191587
MANSC1	0.522296	0.033016
C19orf66	0.522134	0.0185095
DUS1L	0.521625	0.0150085
XPNPEP3	0.521578	0.0224635
LPAR2	0.519353	0.0084939
FECH	0.51904	0.0391293
CHP1	0.518478	0.0244493
APEX2	0.518478	0.0348849
MYD88	0.517868	0.0377588
PPAPDC1B	0.517194	0.0334564
HMGXB4	0.516738	0.0240154
RDH13	0.516724	0.0176303
VAMP5	0.516453	0.044488
OAZ1	0.516393	0.0229324
DNAJC5	0.516259	0.0147672
PSD4	0.516114	0.0165492
STK35	0.514264	0.0149346
RPS6KA1	0.513858	0.0210987
MPND	0.513847	0.0171342
AK2	0.512845	0.00751144
GPAA1	0.511054	0.0193833
PLXNA3	0.510984	0.0283414
ZFP41	0.510268	0.0187305
ACLY	0.509701	0.0259529
SMPD1	0.509428	0.0137945
FPGS	0.508896	0.0303002
AIFM1	0.50748	0.0286874
ZBTB40	0.507139	0.0038593
FAM50A	0.506951	0.0117557
CDC42	0.506674	0.0477492
NOL3	0.506353	0.027093
COG2	0.505792	0.0311138
SLC9A3R2	0.505284	0.0313385
TUBD1	0.505184	0.0467641
UBE3C	0.504882	0.00189574
UBE2H	0.502051	0.00496664
PLXND1	0.500339	0.0189145
SLC2A8	0.499945	0.0149514
B3GAT3	0.499693	0.0190328
C21orf59	0.498402	0.0496987
YWHAB	0.497171	0.0396799
ACVR1B	0.496414	0.0224644
CDV3	0.496119	0.0378486
LDLRAP1	0.494947	0.04464
CAPZA1	0.49475	0.0388934
C1orf43	0.494011	0.029733
NDOR1	0.493799	0.00493231
GSDMD	0.493707	0.0118457
RNF149	0.492246	0.0478485
TXNL4A	0.491959	0.0119546
RAB8A	0.49195	0.0124426
TMCO1	0.491054	0.0278413
AP3M1	0.490292	0.0419349
CKAP5	0.489424	0.0122077
RPUSD1	0.48824	0.0261033
KIAA0040	0.48822	0.0468543
MPDU1	0.48785	0.0270143
GPI	0.48716	0.0176597
POLD1	0.486089	0.0403342
EIF2AK1	0.485909	0.0132808
RAB11FIP3	0.485695	0.00908949
ATP6V1H	0.482637	0.00615203
PIGV	0.48126	0.0360528
IFT46	0.479575	0.0261859
C6orf132	0.478819	0.0353448
PAFAH2	0.478317	0.0427705
PLCB3	0.47562	0.0457681
PSME1	0.471416	0.0100974
CREB3	0.471061	0.0184078
ADCK5	0.4702	0.0101644
TMBIM6	0.468835	0.0491634
GSS	0.468014	0.020801
DPM2	0.466835	0.0343583
MAST2	0.465893	0.0275976
COPE	0.46445	0.0492182
FIBP	0.463846	0.014622
VAPB	0.463429	0.0154157
CUL9	0.463277	0.00590652
43352	0.463008	0.0110925
CSK	0.462666	0.0194237
HCFC1R1	0.462503	0.0214611
KIAA0930	0.460765	0.0148112
FKBP2	0.460579	0.0452932
GRPEL1	0.45987	0.0238017
LONP2	0.457803	0.043666
POGK	0.457723	0.0297277
LCOR	0.457081	0.042978
PLEC	0.456931	0.034629
CYHR1	0.455671	0.0095477
PIGM	0.455302	0.0281764
BSG	0.454992	0.0400876
NARFL	0.454874	0.0327528
ZNF672	0.454447	0.0247326
ITFG3	0.45344	0.0197217
ULK3	0.451624	0.0491201
C9orf37	0.446532	0.0264853
C9orf69	0.446412	0.0201823
TGOLN2	0.443318	0.0226952
TMEM57	0.442716	0.0270293
MAPK9	0.442201	0.0381133
CYTH1	0.441959	0.0326392
IRF3	0.441906	0.0187848
KIF3B	0.441365	0.0105674
USP39	0.440791	0.0158653
HES4	0.439753	0.024977
PEX16	0.438662	0.0229136
NADSYN1	0.43676	0.0161856
APEH	0.435284	0.0308398
ARFGAP1	0.434736	0.0244904
CLMN	0.429601	0.0465364
ELOVL1	0.428829	0.0307846
HIF1AN	0.427978	0.0044825
MEF2BNB	0.426454	0.0153287
ANKRD52	0.42417	0.0296033
CRTC1	0.422281	0.032753
UBL5	0.421484	0.0484949
C1orf159	0.417277	0.0384588
NSMF	0.417264	0.0411082
TRIM41	0.415679	0.0368162
RXRA	0.415667	0.0242535
CACUL1	0.414153	0.0454745
MTA3	0.413518	0.0366578
RNF167	0.411315	0.0267079
B4GALT2	0.411223	0.0224747
ATP6V0D1	0.409596	0.0486996
RAB2A	0.408509	0.0489736
SEC61A1	0.405898	0.0178485
TRAPPC10	0.405521	0.00936182
INPPL1	0.40512	0.0134532
CTSB	0.401657	0.0283342
GATS	0.400179	0.0484913
GMPPA	0.398645	0.0268152
SQSTM1	0.394962	0.0401043
ACP1	0.394879	0.0380715
ASL	0.392161	0.0489491
MYL12B	0.389632	0.0434483
ZNF513	0.386775	0.0440281
EIF4G3	0.384874	0.0281482
ANKRD13D	0.382166	0.0333558
NRBP1	0.379708	0.0292693
VTI1A	0.378806	0.0286493
RTN3	0.377395	0.0497776
UQCC1	0.376105	0.0236528
ERH	0.374907	0.0198281
ARF1	0.372974	0.0450104
SH3BP2	0.372598	0.0431217
GNB1	0.370661	0.0470573
VPS39	0.365129	0.0264953
IKBKB	0.364017	0.0306909
SPECC1L	0.349159	0.045688
NUP62	0.348035	0.0487611
DERL1	0.346401	0.0469291
PEX26	0.337592	0.0462008
ZNF592	0.309811	0.0431706

## Sheet: STAR_DESeq2_up_IDC_vs_Normal
Gene ID	log2FC (IvN)	p-value
DSCAM-AS1	6.93029	8.08785e-10
MMP11	6.50748	1.68769e-39
WBSCR28	6.29679	1.12454e-06
FOXJ1	6.00847	5.39425e-19
CD177	5.65765	1.22719e-08
COL10A1	5.40688	1.4272e-32
Z82214.3	5.30228	0.00011618
KRT75	5.15259	1.30681e-07
GJB2	5.0945	7.82996e-20
SYT13	4.91212	0.00362138
IGFL1	4.77586	1.07919e-12
GRM4	4.70808	4.26105e-12
PRAC2	4.60209	0.00406271
CAPSL	4.56944	1.45112e-11
IGFL3	4.54734	2.63312e-11
PPAPDC1A	4.37467	5.63263e-18
CST1	4.36054	3.29834e-05
C2orf54	4.16972	2.00582e-09
EDN2	4.1466	3.24221e-15
CLEC3A	4.13122	0.000938856
S100A7	4.12664	6.29418e-07
KLKP1	4.10332	1.55727e-17
KISS1R	4.05285	2.41158e-08
HOXB13	4.02046	0.000262725
TUBB3	3.96722	1.41978e-22
PVALB	3.95426	6.0853e-07
LINC00922	3.84424	2.50471e-09
MS4A15	3.83619	0.000345389
TDO2	3.83143	5.14779e-06
INHBA	3.80423	4.71667e-39
SYNDIG1	3.72308	1.18911e-10
CDHR4	3.72201	3.33405e-08
KLK4	3.69036	1.42556e-23
CST2	3.67763	3.16975e-08
GHRH	3.66643	0.000116692
CXCL9	3.61026	1.30412e-09
DIO1	3.60731	3.80518e-07
RP11-388M20.9	3.60041	0.00394978
NKAIN1	3.59843	2.01529e-08
RP11-527H14.4	3.58931	1.56137e-08
RP11-15F12.1	3.58772	1.17534e-06
DLX2	3.55886	1.07281e-05
OLR1	3.55478	4.27778e-12
S100P	3.54383	1.34088e-07
LRRC15	3.51028	5.54718e-09
RP11-127O4.3	3.46702	1.67592e-08
WISP1	3.45436	6.78404e-11
MATN3	3.41238	2.2343e-15
PYDC1	3.40646	2.89368e-05
DUSP13	3.40446	7.10096e-07
KCNH6	3.39107	2.46573e-06
COL11A1	3.35513	5.02483e-05
SLC25A48	3.3468	1.39994e-07
UBE2C	3.3061	9.28618e-12
IL20	3.30216	0.000746384
CYP2B7P	3.2836	3.45555e-07
CYP4Z1	3.28192	3.28886e-05
TNNT1	3.27187	1.66994e-06
PPEF1	3.2623	9.62764e-05
RP11-863P13.3	3.23342	1.57772e-08
COL8A1	3.21507	1.0516e-15
CST9	3.2103	0.00551025
RP11-417E7.1	3.15532	5.43508e-08
NEURL1	3.15332	2.32722e-08
PKMYT1	3.13164	6.44637e-05
EMX1	3.12266	6.00434e-06
TMEM151A	3.11484	4.44636e-05
FAM153C	3.10866	1.70121e-07
RP11-119J18.1	3.09793	1.04669e-07
P4HA3	3.07153	2.46054e-05
DRP2	3.0563	2.01421e-05
SLC24A2	3.04971	2.60291e-08
HSD17B6	3.046	2.18986e-11
KCNJ6	3.0436	0.000133425
AC017002.1	3.04058	1.3805e-08
WI2-85898F10.1	3.03183	1.4693e-08
TCN1	3.02611	6.86563e-05
AIM1L	3.00841	6.5066e-10
EEF1A2	3.00587	1.60199e-10
CTD-2315E11.1	3.0008	5.79991e-05
KCNF1	2.97528	3.38297e-06
PROC	2.95011	6.02842e-14
MYT1	2.91601	1.49595e-07
STMND1	2.90518	6.42249e-07
GRB14	2.89793	0.00104671
TNFSF4	2.85662	4.1911e-06
MFAP2	2.84816	1.0768e-11
DPY19L2P4	2.84121	0.000518256
GPRIN1	2.83388	9.90246e-11
FABP6	2.82801	0.000970514
ARTN	2.80988	9.39231e-12
BIRC5	2.79722	4.85691e-11
CLEC5A	2.78793	5.2795e-12
PAQR4	2.78249	4.63438e-10
TPX2	2.77079	3.61578e-11
CEP55	2.76448	1.14867e-05
PTCRA	2.76219	6.63999e-06
KCNK15	2.73355	8.52859e-12
CTD-3193O13.8	2.72743	5.60419e-05
HOXC13	2.72012	4.97566e-09
KIF26B	2.71624	1.82389e-09
SYT9	2.70567	2.04996e-08
CTHRC1	2.70168	1.12224e-08
EGR4	2.69659	8.20401e-05
TMEM145	2.67092	2.74775e-11
ISG15	2.66507	9.24988e-14
GABRD	2.65226	2.0167e-23
LBP	2.64071	0.00130172
FSTL4	2.63953	1.05532e-07
FOXM1	2.63622	2.0471e-07
TK1	2.62546	1.75063e-12
ADAMTS16	2.62109	1.32323e-08
MMP13	2.61516	3.50404e-06
CNTD2	2.61109	4.51796e-06
VWA5B2	2.60579	4.51751e-08
PAX1	2.60252	0.000148575
LMO1	2.58585	0.000175892
RP1-34B20.4	2.58462	8.93862e-06
RP11-426C22.4	2.57916	6.75461e-08
CCDC19	2.57596	6.55186e-13
PYY	2.57507	5.11643e-05
FAM57B	2.56696	1.95603e-05
DLX1	2.56222	0.00116684
SYT1	2.56157	1.35213e-06
PPP2R2C	2.5604	1.00372e-05
EPHA8	2.55539	0.00827888
PBK	2.54975	2.06067e-05
DCD	2.53608	9.90818e-07
BGN	2.53587	2.80254e-11
IGHG3	2.53149	2.72309e-10
ASF1B	2.52469	4.29902e-12
UNC5B	2.51231	7.79645e-15
IGHGP	2.50626	3.06987e-06
CYP2T2P	2.50621	1.10918e-05
ACTA1	2.4951	7.37944e-06
CACNG1	2.48215	3.45005e-06
MMP9	2.47021	1.71477e-06
JPH3	2.46846	1.48164e-05
IL21R	2.46752	2.39306e-10
SDS	2.46281	8.64766e-08
COMP	2.46149	0.00260023
AL391421.1	2.45117	7.35518e-05
SLC6A4	2.4452	0.00191037
ADAMTS14	2.43274	7.54436e-08
IGHG2	2.42735	4.67652e-05
CILP	2.42439	7.80705e-14
MYO3B	2.41477	0.000398382
AC018816.3	2.4132	4.59478e-06
CACNG4	2.41255	4.68237e-09
MYBL2	2.40798	2.93878e-09
SIRPG	2.40276	4.22297e-05
AC009005.2	2.39529	1.37132e-07
ANKRD22	2.39287	1.30257e-09
IGHG4	2.39023	0.000994796
RP11-304L19.12	2.36877	4.80069e-07
RBM24	2.3645	0.00089732
TSPAN1	2.36332	2.88222e-07
CIB3	2.36305	2.63705e-06
HOXC11	2.35762	7.42466e-07
OASL	2.35215	3.8922e-10
CCDC151	2.34383	2.73259e-07
C5orf46	2.34348	8.7187e-06
RP5-1028K7.2	2.34221	2.75095e-08
CCDC78	2.33581	1.10419e-11
C3orf80	2.33448	2.32336e-07
OPCML	2.32919	0.000979042
RP11-115D7.3	2.3285	0.00151466
DEGS2	2.31694	9.93898e-10
CNTNAP2	2.31404	9.70654e-05
TOP2A	2.30939	6.65902e-07
SORCS2	2.30671	4.03791e-13
LEF1-AS1	2.30148	5.00369e-08
C2CD4A	2.29348	0.000406225
ROBO2	2.28944	0.000475526
AC079776.3	2.28656	0.00144234
COL5A1	2.28628	2.81059e-09
OAS2	2.28537	1.08686e-09
KRT86	2.28482	1.96716e-05
CEACAM6	2.28332	0.000376201
ASPN	2.28129	0.00242061
SPOCD1	2.27787	3.8053e-08
AMZ1	2.27231	5.07444e-05
MKX	2.27199	0.00218975
CILP2	2.27088	0.000477422
TSPAN15	2.26686	7.78209e-11
CSMD2	2.26447	1.32564e-09
ATP8A2	2.26356	3.42392e-05
NRIP3	2.25903	2.46423e-07
RP11-783K16.5	2.25771	1.42735e-08
CRIP1	2.25535	3.9366e-10
PITX1	2.25443	3.79344e-05
CLPSL1	2.2526	1.58235e-07
CDC25C	2.25149	0.00166989
CLPSL2	2.24656	5.65057e-05
KIAA1199	2.2414	2.53981e-05
RP1-212P9.2	2.24015	0.00505724
CORO6	2.23601	2.97474e-09
CST6	2.23536	2.45565e-10
AC110619.2	2.23471	7.97024e-07
CASP16	2.23081	2.13939e-06
GRIN2D	2.22928	8.37501e-10
IFI27	2.22889	1.11383e-09
C20orf201	2.21675	8.99465e-08
CYP4B1	2.2164	4.01874e-06
GAPT	2.21635	2.32979e-09
PAEP	2.20846	7.83978e-05
UGT3A2	2.20205	0.00812384
IFI6	2.20066	1.48828e-08
LAMP5	2.19935	7.3004e-08
RP11-65J21.1	2.19773	0.000157855
ZMYND10	2.1856	5.05719e-08
CCNO	2.18512	2.72767e-09
CCNB2	2.18474	4.03864e-06
MISP	2.18023	1.12614e-06
GREB1L	2.1767	5.31269e-10
COL1A1	2.14664	1.61356e-05
UNC13A	2.14391	0.00549187
PTTG1	2.13515	5.00891e-08
SAMD11	2.13441	1.65583e-05
RIMS1	2.13201	0.000721292
RGS1	2.12752	7.23748e-09
RIMS4	2.12561	1.87045e-09
ADAMTS6	2.12387	1.35551e-05
SLC44A4	2.1179	0.000229523
KCNG2	2.11478	3.80692e-08
LOXL1	2.10766	9.70204e-12
KIAA1644	2.10549	0.000427826
U82695.9	2.10541	4.67959e-06
CCDC64	2.1039	2.58875e-08
NINJ2	2.09076	3.46282e-08
FGD3	2.08911	8.47552e-11
SYNGR3	2.0878	0.000319543
SUSD3	2.07583	1.6382e-07
RP11-429J17.5	2.07534	0.00157815
AC109826.1	2.07394	2.4441e-08
LILRB4	2.07375	1.59409e-08
DNAAF3	2.07363	3.55621e-09
MKI67	2.06195	4.43826e-06
BUB1	2.05936	0.00110774
SULF1	2.05799	1.75293e-10
ILDR2	2.05784	9.30208e-05
ERP27	2.04977	4.29927e-05
LAMP3	2.04401	0.000632599
LINC00607	2.04396	0.000120272
TMEM52B	2.04071	6.66408e-05
PADI3	2.03718	0.00495495
LRRC46	2.0281	3.124e-11
NOX4	2.02539	1.81754e-06
HN1	2.02444	3.49055e-15
FNDC1	2.02331	0.00509624
AGAP1-IT1	2.02212	0.00251478
NAT1	2.01834	0.0016441
BCAS4	2.01694	1.29029e-08
RNF224	2.00852	0.000195461
CYP4F35P	2.00153	0.000239027
TIGIT	1.99867	0.000123786
MICAL2	1.99178	2.09973e-09
CXCL10	1.99067	0.0038535
HIST1H2BH	1.99049	4.62885e-06
AC092569.2	1.98884	0.000333967
PLA2G2A	1.98475	0.00104534
LY6H	1.98414	1.16073e-06
SDC1	1.98234	3.18436e-17
NKD1	1.98184	9.32647e-06
SLC1A1	1.98159	3.80568e-06
SBK1	1.9813	2.33998e-09
TG	1.98088	4.62217e-07
FAP	1.97643	0.000214171
ACAN	1.97618	1.03869e-05
KIF18B	1.97431	0.00121657
MIAT	1.97331	7.68189e-10
RAB31	1.96329	1.39375e-10
AC093642.3	1.96276	2.82836e-06
MAPK8IP2	1.96199	4.16624e-09
GPRC5A	1.96135	1.40351e-09
C1QTNF6	1.95828	2.56683e-13
ZNF469	1.95309	4.5739e-15
CTXN1	1.94198	1.36517e-07
HOXA11-AS	1.93962	8.06758e-05
CFB	1.93909	9.27663e-05
SPARC	1.93787	1.66015e-07
TAL2	1.93784	0.00156038
RP11-263K19.4	1.93724	7.89128e-09
AP000330.8	1.93589	0.000164655
TFR2	1.93398	1.55727e-06
TROAP	1.93374	1.88105e-05
CACNA1B	1.93087	0.00433765
CCR7	1.92965	3.36134e-05
NUSAP1	1.92773	4.79578e-07
MUC1	1.92702	1.6464e-09
IFI44L	1.92105	1.68158e-07
NXF3	1.9131	0.00686891
CD207	1.90137	0.000122513
WNT7B	1.89796	3.26351e-08
TINCR	1.89711	2.91092e-06
FBN1	1.89213	3.85053e-08
CCL19	1.89115	1.00457e-05
LINC00337	1.89086	0.000201298
CAPN13	1.88872	2.27441e-08
ITPKA	1.88386	2.92642e-05
FOXP3	1.8828	2.61242e-06
FN1	1.88269	1.29973e-05
RLTPR	1.87767	8.98704e-08
RND1	1.87697	7.89874e-06
ICOS	1.87478	0.000400619
CENPM	1.86738	6.10903e-07
KIF20A	1.86717	1.76651e-05
SSTR2	1.86666	0.000138537
RIPPLY3	1.86526	0.0028507
HTRA3	1.86181	8.93322e-11
RSPH1	1.85877	4.72528e-08
KIF2C	1.85576	3.27511e-06
THPO	1.8525	4.54255e-05
MSMB	1.85206	0.00981865
CMPK2	1.85182	2.89563e-05
CATSPER1	1.8512	3.27396e-08
TPRG1	1.84987	9.46665e-05
CDC20	1.84758	6.76712e-06
HES6	1.84624	3.61346e-12
GALNT6	1.84534	4.76347e-08
LINC00475	1.8447	6.22047e-06
PTCHD2	1.84451	3.75576e-05
RSAD2	1.84262	1.70477e-07
MGC4294	1.84067	3.98719e-06
PCSK1N	1.83754	0.000413301
OAS3	1.83604	5.67893e-07
TMC5	1.83468	1.33799e-07
HAGHL	1.83169	5.42664e-12
ARSI	1.83095	5.76126e-11
CACNA1H	1.83062	5.52007e-06
LINC00176	1.82633	3.97308e-10
DPEP1	1.8251	1.35699e-05
PGM2L1	1.81428	1.78983e-09
CCDC74A	1.8127	0.00226309
TPSG1	1.81192	0.00614498
RP11-626H12.2	1.81037	2.27994e-05
LINC00940	1.80679	6.83121e-05
AURKA	1.80513	1.15699e-06
43355	1.80332	0.000456109
HIST1H4H	1.79896	5.72431e-05
OLFML2B	1.79759	1.07739e-07
SCUBE1	1.79533	0.000806516
SLC16A3	1.79247	3.89772e-13
TTC16	1.78977	1.21259e-08
UNC5A	1.7868	0.000108292
TEKT4	1.7858	0.00218865
LINC00152	1.78529	2.48866e-06
IGFL2	1.7828	0.00473245
CREB3L1	1.78199	1.90941e-08
CXorf40A	1.78112	0.00533381
F7	1.7808	6.52466e-05
PYCR1	1.77982	3.21006e-06
IGSF9	1.77855	1.19819e-08
IFITM1	1.76978	3.55811e-05
RP11-54O7.3	1.76881	3.3362e-06
CDCA8	1.76236	8.09206e-05
RNF144A-AS1	1.7621	0.000895205
SIX2	1.76011	0.00209272
PDE6G	1.7587	9.4438e-07
OAS1	1.75716	1.41386e-06
SLC44A5	1.75443	0.00246198
KIF23	1.75435	9.37627e-05
MUM1L1	1.75323	1.23624e-06
HSPB1	1.75223	3.40295e-08
ANXA9	1.74832	3.45349e-06
RP11-496I9.1	1.74682	1.2479e-06
COL12A1	1.7468	6.96834e-05
ITGA11	1.74179	3.65967e-07
SPEF1	1.73984	4.53601e-06
SLAMF8	1.73957	6.61302e-06
THY1	1.73911	4.91801e-08
IL4I1	1.73533	6.85561e-09
FGF18	1.7316	3.53439e-05
TICRR	1.73157	0.000153088
DLG3-AS1	1.72818	0.000711655
UBE2T	1.72676	1.63622e-05
M1AP	1.72434	7.07568e-06
RP3-439F8.1	1.72377	6.36254e-05
CDCA3	1.71918	1.08564e-05
SOX11	1.71775	0.000979236
RP11-702H23.4	1.71707	0.000524682
CDKN2A	1.71441	8.08358e-08
HJURP	1.71221	0.000329069
SOWAHA	1.71097	0.00849223
PMEPA1	1.70021	2.30282e-13
TMEM92	1.69964	0.00245238
PLAUR	1.69643	7.7645e-07
CAPS	1.68409	5.07853e-10
AC005355.2	1.68306	0.00148746
TMPRSS6	1.67896	0.00466748
RAB6C-AS1	1.67797	0.00578192
NFAM1	1.67539	2.21917e-09
ANTXR1	1.67538	3.23788e-07
RP11-368I7.4	1.6731	3.1481e-05
IL1RN	1.67148	0.00130129
NUF2	1.66902	0.0042642
MRPS30	1.66521	0.000222243
AURKB	1.6612	0.000126437
CDKN3	1.65746	8.94089e-05
RP11-589N15.2	1.6569	0.000169059
CST4	1.65661	0.000253419
CTD-2201I18.1	1.65583	0.00418294
FADS2	1.65564	0.00012406
RP11-379F12.3	1.64931	0.000292314
RP11-368J21.3	1.64878	1.3099e-05
MAPK15	1.64824	0.00117417
C9orf117	1.6471	0.00015218
SERPINA11	1.64534	0.00996619
CRAT	1.64293	4.8383e-06
E2F1	1.64037	2.29411e-07
AC003102.3	1.64018	0.00268113
FCGR1C	1.63794	0.00694322
P2RY6	1.62973	1.28648e-08
RP11-503N18.1	1.62962	0.000414946
MX1	1.6273	2.05016e-05
TEKT5	1.62358	0.000427135
CHST1	1.62314	5.6377e-06
RP11-123K19.1	1.62276	0.000151152
FSIP1	1.62221	0.000688418
CTC-250I14.3	1.62032	0.000538556
CELSR3	1.61514	5.15247e-09
ENC1	1.61402	1.21049e-08
NXPH4	1.61022	4.5409e-05
LRFN2	1.6068	0.00192704
C9orf116	1.6047	9.78178e-07
MCM10	1.60419	0.00664139
VWA3A	1.604	0.00349768
NCAPH	1.59971	0.00178915
NKAIN4	1.59859	0.000509283
FCGR3A	1.59829	0.000328644
TUBA1C	1.59754	1.68306e-08
FAM155A	1.59692	3.37285e-06
FCGR1A	1.59674	0.00608092
BEST3	1.5949	0.00569659
SPAG1	1.59234	7.75912e-08
PARD6A	1.59093	5.81989e-07
DTL	1.58842	0.000408401
COL1A2	1.58741	0.000599886
PAX2	1.58718	0.00765212
RP11-279F6.3	1.58644	0.000164471
FBXO6	1.58325	1.21733e-09
SMYD3	1.58229	2.42619e-05
SPC24	1.58188	7.36001e-05
E2F2	1.58182	3.048e-05
KIF4A	1.58144	0.00745147
SIX1	1.58016	0.000443805
C9orf106	1.57977	0.000254913
SIGLEC9	1.57933	5.90116e-06
FOXS1	1.57893	2.00026e-07
TLCD1	1.57885	7.72053e-07
DNAAF1	1.57807	1.63599e-05
SFRP2	1.5768	3.80241e-07
S100A14	1.57614	1.81643e-06
EFCAB12	1.57473	4.36132e-05
HIST1H4J	1.57406	0.0099442
KIF14	1.57318	0.00504942
HOXC10	1.57248	8.95425e-05
EVL	1.5722	1.65723e-07
NPNT	1.57116	3.29332e-07
S100A11P2	1.56995	0.000395072
NKX3-2	1.56911	0.00803246
SLC4A8	1.56851	7.75913e-06
GLA	1.56762	0.00315118
C16orf59	1.56636	1.16611e-07
FPR3	1.56632	8.09865e-05
RP11-459E5.1	1.56406	0.00171071
ZWINT	1.56062	2.85194e-05
ELN	1.5583	1.85047e-06
HLA-DPA1	1.55777	0.000121094
OVOL1	1.55591	0.000120609
RP11-708J19.2	1.55527	0.000468001
NREP	1.55322	1.0332e-06
UNC5B-AS1	1.55251	2.20722e-05
GXYLT2	1.55229	0.000331603
RAD51	1.55176	0.00884917
LILRA4	1.54817	0.00210146
CCDC42B	1.54707	0.00264267
MORN5	1.54688	0.00301285
HOXC-AS3	1.54648	0.00283236
RP11-510J16.5	1.54347	0.000665325
ITGBL1	1.54335	3.03003e-07
MDS2	1.54331	0.00643572
KIAA1467	1.54248	2.00847e-05
CXCR3	1.53899	0.000110752
NPR3	1.53733	0.00775533
GLYATL1	1.52832	0.00914561
RARRES3	1.52756	8.33028e-07
PLK1	1.52357	8.42235e-06
CHAD	1.52338	0.00879923
KRT18P51	1.52055	0.00283402
SPP1	1.52032	0.00121852
SERPINE1	1.52014	0.000480276
ANLN	1.51986	0.000643392
OTOA	1.51803	5.9441e-05
C9orf169	1.5166	3.46898e-06
SYCE3	1.51538	0.000693302
FRMPD3	1.51466	0.0074121
CDK1	1.5125	5.08658e-05
OAZ3	1.50774	4.14019e-06
IQGAP3	1.50713	0.000236457
SLC40A1	1.50412	2.51588e-07
PYCARD	1.5038	1.56946e-09
GATA3	1.50326	3.08357e-06
AKR7A3	1.50245	0.000224491
TMEM132E	1.50227	4.94599e-05
STMN2	1.50025	0.000175027
MORN3	1.497	2.32707e-05
ECM1	1.49599	9.11242e-07
FOXO6	1.4954	3.88589e-08
KIF11	1.49307	0.00049435
RN7SL3	1.49225	0.00108306
CENPF	1.49019	0.00183154
EPHB2	1.48958	8.05544e-06
PLAU	1.48765	1.1559e-05
GBP5	1.48347	0.00554381
PCSK6	1.48012	0.0029277
CCL11	1.47986	0.0032473
C5orf49	1.4789	0.000553551
SLC16A6	1.47781	0.0069953
KIAA0101	1.47718	0.00038148
IGSF21	1.47699	0.000880268
RBP5	1.47654	0.000153513
KRT8	1.47385	2.7943e-06
WDR62	1.47344	1.68985e-07
MICALCL	1.4724	0.00674444
LBX2-AS1	1.4719	1.26788e-05
FCGR1B	1.47179	0.00154445
IGFALS	1.47149	0.00117671
MSC	1.47009	4.67763e-07
FUT2	1.46953	2.18561e-05
EVI2A	1.46841	0.00181513
SRPK3	1.46712	0.000374126
GRIK4	1.46378	0.00210876
CENPP	1.46294	6.28794e-05
PRND	1.46228	0.00231923
B4GALNT1	1.46125	3.63173e-06
PSCA	1.46124	0.00989887
RAMP1	1.45981	7.62435e-06
RELT	1.45817	2.55395e-08
KLHDC7A	1.4578	0.00499792
USP30-AS1	1.45535	0.000329262
RHOD	1.4536	2.86332e-06
AEBP1	1.45023	1.54753e-06
CCDC109B	1.44965	1.76637e-08
SOWAHD	1.44933	6.5636e-05
CD300LF	1.44914	3.08844e-05
PDCD1	1.44598	0.00020143
RRM2	1.44593	0.00370497
TNFSF9	1.44587	0.000586126
TLL2	1.44456	0.00885876
FAM26F	1.4428	0.000557743
ASPM	1.44037	0.0097618
IL2RA	1.43916	0.00550286
CLDN9	1.43592	7.4333e-05
COL3A1	1.43476	0.00377417
FAM183A	1.43157	0.00897476
SCUBE2	1.43093	0.00149979
HIST1H1C	1.42738	5.85007e-05
LINC00861	1.42663	0.00114816
VOPP1	1.42619	1.24962e-06
CSDC2	1.42352	2.122e-07
DOK7	1.42207	0.00162431
ATP10A	1.42124	4.29392e-05
PTPRT	1.42115	0.000599319
IRF7	1.4194	2.25783e-10
TPBGL	1.41938	0.00108891
PLA2G2D	1.41719	0.0101787
SIX4	1.41615	3.45993e-05
ARSB	1.41415	1.72799e-06
BIK	1.41362	1.41165e-05
GINS2	1.41293	0.00204124
B4GALNT4	1.41124	5.00683e-08
SERPINH1	1.41007	1.1038e-07
RP11-150O12.6	1.40924	0.00291062
FAM83D	1.40887	0.00702015
TMEM63C	1.4056	2.3547e-06
C3orf52	1.40447	0.00528882
UGCG	1.40311	9.85243e-05
IFI35	1.40243	4.33682e-06
GPR68	1.40089	1.39072e-06
RIBC2	1.39877	0.00846078
HPN	1.39872	0.000359498
HLA-DPB1	1.39864	0.000306416
CHSY3	1.39787	0.00897002
MIR210HG	1.38967	3.19957e-06
SLC29A3	1.38842	1.93132e-06
SPIB	1.38457	0.00342426
FAM111B	1.38455	0.0044636
CAPG	1.38433	4.24533e-07
TACC3	1.38429	3.95822e-06
DNAJC22	1.38212	0.00122169
STK32B	1.38137	0.000126475
RP11-475N22.4	1.38131	0.0039653
IQCD	1.381	3.07346e-05
TMEM132A	1.37912	2.26607e-05
RP13-122B23.8	1.37864	0.0002764
ADAM19	1.37812	1.25799e-07
NLRP12	1.37592	0.00287253
CYFIP2	1.3759	6.81705e-09
RP11-465N4.4	1.37553	2.39069e-05
UBE2S	1.37471	0.00184746
SCIN	1.3727	0.00151272
CRABP2	1.37045	0.000100602
RP11-295G20.2	1.37025	0.000491559
GLIS2	1.36332	1.20024e-06
SH2D4A	1.3598	4.58714e-05
CTD-2319I12.1	1.35938	6.31067e-05
VSTM2L	1.35863	0.000942165
AC005077.14	1.35863	0.00402455
C1QB	1.3562	5.53626e-05
NCAM2	1.35603	0.00390316
MS4A7	1.35573	0.000201503
DPYSL3	1.35567	1.0882e-07
HOTAIR	1.35342	0.00440565
S100A11	1.35246	2.49583e-05
LINC00160	1.35239	0.00157442
ADC	1.35	3.1894e-09
PODNL1	1.34921	5.63121e-07
RP11-429J17.7	1.34852	0.000601247
TTLL12	1.34722	9.48801e-06
AC015849.2	1.34707	0.0024274
FBXL16	1.34447	0.000554914
RP11-552F3.9	1.34306	0.00124834
TPRN	1.34166	3.38005e-08
ETV7	1.34101	0.00139055
PSMB9	1.33792	0.0021336
LLGL2	1.33728	3.50418e-07
RP11-383H13.1	1.33687	0.000632456
HSF2BP	1.33664	0.00574818
CTD-3193O13.9	1.33479	1.14585e-05
LEF1	1.33411	0.000216644
F2RL3	1.3336	0.000166155
PCDH17	1.33179	1.02735e-07
GAS2L3	1.32934	0.00177997
KPNA2	1.3276	0.000234628
POLD4	1.3267	1.63709e-06
PAFAH1B3	1.32603	2.70266e-08
GDF15	1.326	0.00129058
RGS11	1.32544	3.32741e-05
CHRD	1.32414	3.36465e-06
IL18	1.32393	5.67063e-05
CIITA	1.32306	5.21255e-07
DIAPH3	1.3222	0.00958733
GTSE1	1.32204	0.00019382
BST2	1.32066	7.1689e-05
POLR3K	1.32012	4.26132e-07
CPNE9	1.31957	0.00141891
REEP1	1.31823	3.43209e-05
LAPTM5	1.31629	6.706e-08
LRRC32	1.31555	5.86822e-08
RP11-98D18.9	1.31531	0.00115031
LYZ	1.31524	0.00198528
TOX2	1.31385	0.000904623
RP11-83N9.5	1.3136	0.00374032
C1QC	1.31354	0.00108226
TRAC	1.31275	0.000850227
EPO	1.31202	0.00673839
LINGO1	1.30946	0.000448325
SELPLG	1.30437	7.23833e-05
N4BP3	1.30392	7.79553e-07
SLC2A6	1.30341	3.46776e-06
UCHL1	1.3011	0.000195223
CENPE	1.30063	0.00128146
EME2	1.3001	1.39983e-08
SAMD14	1.29756	8.0305e-07
C15orf59	1.29673	0.00262069
RAD51AP1	1.29633	0.00103391
OSCAR	1.29573	1.53605e-05
SIM2	1.2948	0.00012692
EPSTI1	1.29415	0.000217452
NUPR1L	1.29254	0.000929172
SLC51A	1.29048	0.000915689
LRP4-AS1	1.28924	0.00323676
TFDP3	1.28732	0.00785709
AC074389.9	1.28637	0.0100926
TGFB1	1.28613	6.16109e-06
CBS	1.28599	0.00159188
SLC7A8	1.28243	3.8561e-05
PXDN	1.28235	4.66823e-11
RHBDL1	1.28161	1.28905e-06
RP11-92K15.3	1.27846	0.00200764
GRM2	1.27769	0.0056851
RDH16	1.27762	5.94761e-05
SLC7A5	1.27345	5.24263e-05
COL8A2	1.27332	0.000528574
RTN1	1.27314	0.00344059
RACGAP1	1.27102	0.0105184
NEFH	1.26968	0.000120564
PLA2G4F	1.26851	0.000259993
LAT2	1.26658	2.67802e-07
REEP4	1.26609	3.61896e-07
PGP	1.26534	8.19747e-08
CNIH2	1.26531	1.31209e-06
TREM1	1.26399	0.0102243
SPI1	1.26396	8.06495e-05
TTLL9	1.26324	0.000132863
ZNF467	1.26321	3.9019e-08
RHEBL1	1.26224	1.68303e-05
AP001007.1	1.26197	7.95131e-05
C6orf1	1.26188	3.89864e-07
PRR15	1.26128	0.000173564
LAGE3	1.26031	0.000144174
FBN2	1.26004	0.00704759
ITGAX	1.25981	4.52921e-05
ZNF385A	1.25962	4.01221e-05
RAB26	1.25593	3.98631e-06
PARD6B	1.25538	0.00336301
B4GALNT3	1.25527	0.000355753
RAD54L	1.2551	0.00233234
SLC12A8	1.25494	0.000316585
HMGB3	1.25453	0.000280783
CHPF	1.2541	1.80698e-10
ZNF668	1.25363	5.85231e-10
CA12	1.25256	0.00011018
COX6C	1.25209	0.00209466
EOMES	1.2519	0.00100941
TRIP13	1.2513	0.0010196
UBE2QL1	1.25053	0.00371764
RP11-480I12.5	1.24997	0.000205682
SEMA7A	1.24829	1.01062e-05
RHBG	1.2481	0.00325447
SLAMF9	1.2478	0.00400045
KRT8P41	1.24664	0.00366194
CCDC153	1.24445	2.54721e-05
MB	1.24385	0.000449535
COL5A2	1.24255	0.00373089
CERCAM	1.24188	4.3875e-05
SLC15A3	1.24158	5.02913e-06
MIR4435-1HG	1.24051	0.000146229
LRRC10B	1.2404	0.000378438
DOPEY2	1.23952	3.03918e-10
TMEM191C	1.2394	0.000664402
HPSE	1.23855	0.00702783
TYROBP	1.23686	0.00021689
RHPN1	1.23669	4.99877e-08
COL6A1	1.23333	3.76355e-06
FAM159A	1.23256	4.53288e-05
RP11-398C13.6	1.23244	0.0105078
BASP1	1.23003	0.000133818
KIFC2	1.22961	0.000936646
TYMP	1.2288	8.71838e-08
CD74	1.22682	2.89648e-05
TMC7	1.22678	0.00658597
CD300LB	1.22674	0.00275691
STAT1	1.22672	4.75077e-05
KIF24	1.22328	0.00380956
TPM3	1.2224	3.91304e-05
F12	1.22223	0.0001201
AATK	1.22092	0.00759467
MAL2	1.22082	0.000290125
ADORA3	1.22072	0.00847365
AF001548.5	1.21573	0.00102528
POC1A	1.21568	0.000110627
WDR76	1.21425	2.33165e-05
PHLDA2	1.2128	7.69163e-05
TGFB2	1.21165	0.000357397
IGSF6	1.21108	0.00523344
COL6A3	1.21103	0.000440576
FIBIN	1.21098	0.00683117
DPP3	1.20702	3.09402e-05
CMAHP	1.20697	0.00253854
MGAT5B	1.20626	0.0104208
ECT2	1.20437	1.6614e-05
WDR65	1.20381	0.00168985
SPOCK2	1.20308	0.000344517
ARHGAP11A	1.20213	0.00294624
SUGCT	1.20187	0.00717667
CCDC96	1.20181	0.000103777
SLC38A5	1.20177	3.59408e-05
C9orf89	1.2014	0.000219738
PRRT3	1.20036	1.05212e-06
KRT18P29	1.20012	0.00586725
TGM2	1.19994	0.000329047
MCM2	1.19805	0.000948326
DENND1B	1.19668	9.60192e-05
TRIM46	1.19599	0.000110054
IFITM10	1.19557	0.000383271
CD3D	1.19473	0.00214287
GADD45G	1.19282	0.000197489
TP53I11	1.19251	3.91998e-05
TUFT1	1.19065	0.000346718
ADAMTS7	1.18816	0.000105199
LY86	1.18743	0.00182486
TRIM3	1.1874	0.000147109
CTD-3193O13.1	1.18512	0.00566724
LDLRAD4	1.18418	8.9884e-08
ABHD2	1.18227	1.52322e-05
GALE	1.18066	3.58556e-05
SLC6A6	1.17748	0.000141818
PSEN2	1.17446	4.33268e-05
MOXD1	1.17419	0.00117141
ITGB2	1.17402	0.00029643
EZR	1.17386	2.26338e-06
GAL3ST4	1.17291	5.41656e-06
CDT1	1.16974	0.000704842
COMTD1	1.16937	1.78473e-06
FPR1	1.16935	0.00490108
C3AR1	1.16842	0.00632862
AIFM3	1.16805	7.40058e-05
CCNF	1.16626	4.55505e-06
GATA3-AS1	1.16524	0.0049161
PPM1J	1.16503	0.00258614
AGMAT	1.16487	0.00619148
SLC2A13	1.16439	0.000167852
H2AFX	1.16226	1.57354e-05
MRPS7	1.16068	3.92014e-05
HTRA1	1.16001	7.5282e-05
PAX9	1.15985	0.00318466
TMEM79	1.15894	1.66663e-06
CXCR4	1.15796	0.00319262
CD300C	1.15783	0.00356734
P2RY2	1.15605	0.000470676
CCDC167	1.15385	1.27599e-06
ZBTB18	1.15305	0.00219295
IL24	1.15255	0.00516953
RECQL4	1.15171	6.73186e-07
HSH2D	1.15123	0.000416814
APOBR	1.15023	3.43686e-05
IDH2	1.14962	5.16923e-07
UCP2	1.1449	4.25702e-05
RP11-120K24.5	1.14385	0.00471864
CRB3	1.14192	0.000619853
ARNTL2	1.14171	0.00284194
LMCD1	1.14045	1.15546e-07
CD5	1.14016	0.000797224
AP000487.6	1.14012	7.8635e-05
CYP2S1	1.13833	0.0002177
BCAS1	1.13783	0.00335906
CHKB-AS1	1.13771	0.00325256
RASGRF2	1.13768	0.000237777
CD48	1.13705	0.00739671
ACOT4	1.13563	0.00124719
EPPK1	1.13502	5.08108e-05
CDKN2D	1.13076	1.01056e-06
BRSK2	1.13016	0.00423051
METRN	1.12681	0.00197374
BARD1	1.12472	3.00658e-05
PARP12	1.12467	2.69468e-07
CIT	1.1242	0.000844901
MILR1	1.12214	0.000600774
PRSS22	1.11973	0.00071068
RP11-473M20.11	1.11966	0.00616319
STX1A	1.11963	8.09934e-06
ZBTB32	1.11887	0.00383818
BAI2	1.11474	0.00156758
CCNE1	1.11469	0.000325797
CIB1	1.11433	1.1513e-05
TJP3	1.11421	0.000101947
PAQR6	1.11392	0.000890566
FAIM3	1.11321	0.000845914
CUEDC1	1.11318	2.28019e-05
ATAD2	1.11139	0.000201258
CD84	1.11092	7.2073e-05
GPR132	1.11066	6.35345e-05
FCGR2A	1.11035	0.00375348
ABCG1	1.10853	9.69229e-05
PLOD2	1.10683	0.000150231
ABCC5	1.1059	1.00027e-05
FAR2	1.10519	0.00217349
RAP2C	1.10383	0.000638478
CCNB1	1.10303	0.00442551
PRR15L	1.10137	0.000165982
SNRNP25	1.10098	7.74802e-06
LINC01094	1.10071	0.000396582
CAP2	1.10027	0.00289859
BMF	1.09994	0.000193108
C5AR1	1.09854	0.00109611
PROM2	1.09835	3.90602e-07
MRPS21	1.09677	9.38165e-05
VWA2	1.09543	0.00264737
AC005789.11	1.09543	0.00117979
C5AR2	1.09534	0.00174113
NOX1	1.09384	0.00652454
FLVCR2	1.09032	0.00233012
BMP1	1.08946	7.7154e-06
CALU	1.08869	3.08377e-06
POLB	1.0881	2.29607e-05
SDSL	1.08763	2.9146e-05
PPP1CA	1.08756	0.000177433
S100A16	1.08468	0.000439539
DRD4	1.08427	5.69342e-05
DYX1C1	1.08414	0.00238654
ZC3H12D	1.08198	0.00884014
LAMTOR2	1.08172	3.03294e-06
AC007362.1	1.07998	0.00149695
43351	1.07952	1.20542e-05
IGFBP5	1.0793	0.00032961
MSRB1	1.07882	2.59563e-05
KCNS3	1.07845	0.00356239
GOLT1A	1.07699	0.000206793
PTPN7	1.07677	0.000233329
SFXN5	1.07629	3.22631e-05
CDK2AP2	1.07593	0.000197774
TLE6	1.07573	0.000792957
GTF3C1	1.07544	1.62438e-06
CCND1	1.07489	7.72094e-05
ASIC3	1.07423	8.01407e-05
DUSP10	1.07343	8.8706e-05
PRR19	1.07047	0.000119333
TTYH3	1.06996	3.32204e-06
ARL11	1.06641	0.00532574
CD2	1.06539	0.00303868
MMP14	1.06534	6.89251e-06
NBL1	1.06502	0.000605296
CRYBB1	1.06389	0.00365747
KAZALD1	1.06383	0.000213265
ADAMTS2	1.06051	0.0031852
AMH	1.05976	0.0041115
RUNX1	1.05927	2.31521e-05
MCM4	1.05907	3.16609e-08
PACSIN1	1.05894	0.00655248
SULF2	1.05825	0.000179756
RP11-108M9.4	1.05785	0.00981542
HSD3B7	1.0576	7.86016e-06
MAPKAPK2	1.05707	3.27491e-07
PRR11	1.05688	0.00713043
RGS19	1.05662	1.06921e-05
TMEM119	1.05526	0.000263565
EGLN2	1.05395	1.54629e-06
VAV3	1.05368	0.000239828
MDK	1.05354	0.000430535
COL6A2	1.05194	0.0022845
SCCPDH	1.05144	5.76976e-06
LRRC56	1.04994	0.000166043
COPZ2	1.04949	0.00141087
JADE3	1.04794	0.00223985
LRFN4	1.04759	0.00135376
CDA	1.04745	0.00837935
MXRA5	1.04724	0.00134838
IL12RB1	1.04547	0.00125906
ASRGL1	1.04448	0.00871189
F11R	1.0441	4.18516e-07
ITGB5	1.04302	4.71793e-07
SREBF1	1.04296	0.00593841
CLSTN2	1.04106	0.00342201
EPN3	1.04082	0.000213331
CDH11	1.0402	5.32173e-05
GIPR	1.0393	0.00241283
ENSA	1.03891	1.81958e-05
MIEN1	1.03759	0.00683444
APOA1BP	1.03743	0.000197346
KCNQ3	1.03688	0.0032173
RP11-253M7.1	1.03586	0.00179056
SGIP1	1.0355	0.000358154
SGPL1	1.03482	2.06168e-07
KRT19	1.03152	0.000399227
TRPM2	1.03147	8.84598e-06
STX6	1.03067	1.20887e-07
ECE2	1.03023	3.15525e-05
RUVBL1	1.03002	6.09036e-05
ADM2	1.02973	0.000829433
RNFT2	1.02938	0.00480119
LEPREL4	1.02897	5.59436e-07
MST1R	1.02886	3.84909e-05
RASSF7	1.02792	1.31126e-05
ZNF552	1.02759	9.47762e-05
CPNE7	1.02601	0.0101759
LILRB1	1.0257	0.00854653
ITGAL	1.02564	0.000165863
USP35	1.02558	0.000191243
RP13-582O9.7	1.02537	0.0016451
ORMDL2	1.0252	0.000465807
KCNC3	1.02498	0.00703688
CCDC114	1.02471	0.00409191
TUBG1	1.02451	0.000366399
SPSB1	1.02413	0.00157735
POLR2L	1.02327	9.0055e-05
MAP4K1	1.02316	0.000290658
LYPD3	1.02203	0.0057552
IFITM3	1.02087	0.000828287
IL2RG	1.02078	0.00309922
RNASEH2A	1.01884	7.05807e-05
VASH1	1.01781	3.20614e-05
SLC9A3R1	1.01623	0.00230552
IRF8	1.01297	0.00392004
MYO1D	1.00822	0.000272582
NCKAP1L	1.0075	0.000322562
C1orf122	1.00736	0.000328082
CISH	1.0068	5.78768e-05
LIMK1	1.00585	3.84551e-07
CD276	1.0052	2.35738e-05
CDK5	1.00472	3.10439e-05
SCUBE3	1.0039	0.000585245
HIST1H2BK	1.00385	0.00115166
RP11-465B22.3	1.00379	0.00240066
TMED3	1.00371	0.0005766
SLC25A22	1.00366	3.17767e-06
ARMC9	1.00248	6.14634e-08
LRRC73	1.00234	0.00260304
TRIM59	1.00123	0.000494367
BATF	1.00009	0.00137561
C1orf85	0.999679	1.57333e-05
MTL5	0.997994	0.00130018
CD83	0.996992	0.00131084
RP6-109B7.5	0.996443	0.00785207
IL11	0.996325	0.00014782
TSEN15	0.996014	1.98165e-05
APOC1	0.995664	0.00716615
ARHGAP22	0.993612	0.00123653
CKAP4	0.993539	3.67447e-05
NAPSB	0.993312	0.000795887
VWA1	0.993105	2.21544e-06
PRKCD	0.992749	2.92241e-06
SLC12A5	0.992662	0.00510005
DYNLL1-AS1	0.992481	0.00153148
GNGT2	0.99247	0.00140294
BPGM	0.991798	0.000369066
CACNB3	0.991639	4.08363e-05
FAM102A	0.99079	7.02019e-06
SIAH2	0.988982	0.00912332
PPP1R26-AS1	0.988064	0.00637318
ALDH1B1	0.987747	2.75842e-06
IFI44	0.986451	0.0090221
KIF5C	0.986136	0.00158341
VMP1	0.985566	0.000317493
NID2	0.985232	0.00941018
COTL1	0.984957	0.000174068
RP11-339B21.10	0.984601	0.00215991
IFITM2	0.983329	0.00325535
PKM	0.9832	0.00230008
TBC1D9	0.98064	0.00276587
ERBB2	0.980503	0.00499288
SRRM3	0.980291	0.000521379
KLHDC9	0.980206	0.000819596
TMEM86A	0.980111	0.00599209
ADIPOR2	0.979948	5.97873e-05
CD4	0.979085	0.00632274
RP11-74C1.2	0.978325	0.00107676
CTD-2015H6.3	0.977991	0.00024075
CARD11	0.976524	0.0013625
GALNT18	0.974644	0.00085816
ZBP1	0.974071	0.00637631
SRPX2	0.973133	0.000324535
FAM173A	0.973032	2.63844e-05
PRAF2	0.971716	1.95893e-07
PFDN2	0.970586	0.00242695
FLAD1	0.97039	1.86169e-07
LRRC59	0.969791	2.31227e-05
TSPAN9	0.968835	1.98228e-05
GINS1	0.968283	0.00573306
UBXN10	0.967528	0.00967777
DNASE1L2	0.967247	0.00135739
RNPEP	0.967152	0.000899836
DAP3	0.967111	0.000239446
ZNF710	0.966334	0.000190602
HILPDA	0.966008	0.000443165
C17orf62	0.965859	2.53279e-09
LGALS9	0.965676	0.000243093
ARPC1B	0.965505	1.27467e-10
GMIP	0.964764	1.56712e-07
SYT17	0.963521	0.00533767
PCGF2	0.961964	0.00406419
LDLRAD3	0.96161	0.00141956
CD52	0.961606	0.00565068
CD86	0.960171	0.00420082
MN1	0.959395	0.00355655
SHISA2	0.958521	0.0102218
SLC52A3	0.958284	0.00280949
SSPO	0.957951	1.97284e-05
TMEM121	0.957684	0.000330133
FAM104A	0.957523	4.57609e-05
SLC11A1	0.956652	0.000775145
ATP6V0B	0.956382	5.39171e-06
IFNGR2	0.955312	3.82796e-05
CDR2L	0.954723	0.00120558
ACBD6	0.954189	0.000748354
CDC42SE1	0.953925	7.54852e-05
CYB5A	0.953632	0.000574149
ROGDI	0.952186	4.32943e-05
NLRC5	0.951253	0.000402702
APLNR	0.950293	0.000895899
RUNX2	0.949723	0.000307371
NRP2	0.949263	1.11097e-05
CAMK1D	0.949259	0.00483298
RGS14	0.948033	0.000632172
RP4-616B8.4	0.947758	0.0087026
PPP4C	0.946994	0.000873862
COMMD5	0.94465	0.000986328
LRRC20	0.942593	0.0073781
ELF4	0.941511	0.00665283
MPC2	0.940568	0.00151164
RAI14	0.940549	0.00231936
SYT7	0.939335	0.0100375
SAE1	0.938761	0.000496967
VCAN	0.937828	0.0051408
DNAH14	0.936908	0.00192276
TCEAL1	0.936097	0.00749869
WDR1	0.935823	8.61545e-09
SMAP2	0.93491	0.000322324
ALYREF	0.934594	0.000161598
TNFRSF19	0.934426	0.00701112
S100A10	0.933132	0.00172462
RP11-157P1.4	0.932874	0.00262811
LINC00467	0.931414	0.00418295
DCTPP1	0.931359	7.33585e-06
SLC39A11	0.929621	1.65108e-05
FBLN2	0.929562	0.000290289
RP11-432J24.2	0.929374	0.00318372
DNALI1	0.929323	0.00691772
B4GALT3	0.929314	0.00134244
THBS2	0.928739	0.00216706
UQCR10	0.928283	0.000171208
C2CD2L	0.927612	5.11255e-06
KPTN	0.927118	0.00034551
DOK1	0.927046	0.000750276
THBS1	0.926698	0.00068575
HOXB7	0.925282	0.00130628
MARCKSL1	0.92526	0.000204292
RP11-435P24.2	0.924886	0.005787
SYK	0.924826	0.000511346
LSM4	0.924509	0.00037664
LIMD2	0.92394	0.000135289
NUAK1	0.923106	0.000690365
SASH3	0.92145	0.0060468
SAMD9	0.921369	0.00429832
WDFY4	0.920759	0.003411
CORO1B	0.918977	0.000262527
TM6SF2	0.918486	0.00999939
SECTM1	0.917186	0.000551986
UNC5C	0.917081	0.00976019
RUSC1	0.91707	0.00307522
KCNJ11	0.916962	0.0059666
MGST3	0.916718	0.00113649
CST7	0.916657	0.00169512
SEPHS2	0.916348	0.00106412
SPN	0.915411	0.00148169
SPECC1	0.915077	0.000641649
TBC1D7	0.914239	0.00652097
PLXNA3	0.914213	1.56401e-05
CADM1	0.914078	0.0065647
ATOX1	0.913835	0.000343236
PTGS1	0.912729	0.00014809
RGS3	0.912681	0.00497777
TTC39A	0.91244	0.00618307
ELFN1	0.912098	0.0011103
PARVG	0.911395	0.000483023
CD37	0.911124	0.00218906
GLB1	0.910375	0.00284817
TGFB3	0.91005	0.0022925
SMS	0.909181	5.1513e-05
DLL4	0.90897	0.0035045
PTGFRN	0.908937	2.53852e-05
GPR160	0.908777	0.00114174
RP11-382A20.2	0.90765	0.00184362
PSMB3	0.906995	0.00450374
GPR161	0.906817	0.0040727
WAS	0.905459	0.00129806
DPCD	0.905131	0.00143747
RP11-307C12.11	0.904562	0.00112248
FOXA1	0.903217	0.00364231
C5orf30	0.902776	0.00271869
LRRN2	0.902325	0.00305256
PEA15	0.902002	8.18852e-05
SLC6A8	0.900668	1.80796e-05
NCDN	0.899433	0.00178104
CRIP2	0.899413	0.000432455
CDCA4	0.89727	0.00139796
FAM109B	0.896987	0.000436736
CD9	0.896848	0.000267393
TMEM191A	0.896652	0.00189297
MCU	0.896103	2.53911e-07
CEACAM21	0.89571	0.00633168
ATP6V0E2	0.895115	0.00286254
CACFD1	0.895073	0.000104018
CTSA	0.894991	1.5388e-05
SPR	0.894754	0.0030099
AOAH	0.893666	0.00137952
VAV1	0.893218	0.000454538
PSENEN	0.893178	0.00247384
TSTA3	0.893016	6.33701e-05
CCT3	0.892804	0.000301437
UBTD1	0.891206	8.9034e-06
AP3M2	0.889558	1.5607e-05
CCL5	0.889547	0.00632923
PPP6R1	0.889236	0.00128579
SLCO2B1	0.88921	4.97031e-05
CPPED1	0.889207	0.0076294
NACC1	0.886854	0.00964858
RP11-889L3.4	0.886632	0.000818803
SERF2	0.884217	0.0013821
ADAM8	0.883922	0.00538761
LEPRE1	0.883634	0.000593453
TMEM8A	0.881405	6.24346e-09
LINC01116	0.881021	0.0101399
FBXO41	0.880915	8.11569e-06
PYCRL	0.879628	0.000441701
DNAJC1	0.879089	0.000294973
COL5A3	0.878998	0.00108023
CBX4	0.877115	0.000257084
ARNT2	0.876714	0.0024567
CD6	0.87646	0.00825161
ABHD12	0.875685	0.000532125
HOMER3	0.874837	0.00020245
TTC9	0.874563	0.000713936
ESPN	0.873937	0.00575827
ITGA5	0.873904	0.000318839
PIK3R3	0.872681	0.00205296
TRAFD1	0.872567	0.000882154
TFPT	0.872002	0.00192212
CCDC40	0.871293	0.00228956
DBN1	0.871158	0.000169031
RARA	0.868362	0.00282918
LSR	0.868273	0.00302172
CSRNP2	0.867546	7.56591e-06
NCS1	0.867498	7.59197e-05
PPP1R14B	0.86746	0.0032888
PDGFB	0.866116	0.00379164
METTL2A	0.866034	0.0010163
NEK6	0.865317	4.13684e-05
SIGLEC1	0.865274	0.00798814
GSTCD	0.864655	0.00173015
OAZ1	0.863544	2.40832e-05
TLE3	0.863123	0.00106148
APOL1	0.863067	0.000736218
AC147651.4	0.863049	0.00124383
TBCB	0.862277	0.000465644
EMB	0.862002	0.00848046
BAIAP2L1	0.861756	1.55501e-05
HID1	0.861211	0.00182145
TIMP2	0.8612	0.00192975
PSMC4	0.860665	0.000815122
TRIB3	0.859747	0.00266851
NAGK	0.859261	0.000309689
NAT14	0.85885	3.79041e-05
FLYWCH2	0.858787	0.00121031
CORO2A	0.858341	5.34125e-05
ANAPC11	0.858312	0.00118605
C17orf72	0.858076	0.00664355
SMIM5	0.858044	0.00702919
SHB	0.857291	3.18247e-05
ZNF28	0.857078	0.0058006
RASAL3	0.856387	0.000295822
SLC52A2	0.856011	7.34066e-07
SLC22A18	0.855916	8.42993e-05
TRIM14	0.855612	0.00184016
COL4A1	0.855016	0.000578016
ENO2	0.85422	0.00363878
EPHA10	0.854166	0.00282771
MRPL24	0.854082	0.00311186
FAM26E	0.853949	0.00271587
TRIM62	0.853255	0.000555876
EFNA4	0.852883	0.00424109
FBP1	0.852338	0.00393344
GPX8	0.852324	3.72061e-05
PAM16	0.852274	0.0071948
ELP4	0.851823	0.00255491
ARF3	0.851656	5.94447e-05
ZNF703	0.850763	0.00302769
IL32	0.850325	0.00244206
RRM2B	0.850069	0.000391994
AR	0.849037	0.00458687
CDYL2	0.848681	0.00651353
FAH	0.848345	0.00140987
DUSP23	0.848223	0.00111375
MRPS34	0.8473	0.000735428
ADAP1	0.847224	0.000712198
HAGH	0.845464	0.000143586
EVA1B	0.84405	0.00104128
COX17	0.844011	0.000360277
HCFC1R1	0.843838	2.0689e-06
NFKBIE	0.843714	0.000163599
GPR162	0.843631	0.00313371
GPC1	0.842997	2.90283e-06
KIAA1462	0.842728	0.00238618
MVP	0.842601	4.97367e-05
FAM214B	0.839467	0.00184477
NUP210	0.838438	1.1926e-05
LAIR1	0.836931	0.00412352
TBXAS1	0.836907	0.000159869
COLGALT1	0.836142	1.69657e-05
HMHA1	0.835949	0.000324115
PTAFR	0.835498	0.00635793
RNF32	0.83539	0.00592839
DDX39A	0.835002	7.17135e-05
MMP17	0.833636	0.00145283
SNAI3	0.832544	0.00203538
GRN	0.832223	0.00192387
KDM4B	0.831095	0.00605096
TMEM134	0.82949	0.00254393
NAGA	0.828957	1.41305e-05
PSPH	0.828873	0.000413217
DOK3	0.828459	0.000220799
PLEKHO1	0.827578	0.000185683
PRLR	0.825912	0.000927019
NKD2	0.825805	0.00075012
PLXNA2	0.824456	0.00164285
C12orf49	0.824241	0.00399828
CHST11	0.823587	0.00277675
CCDC80	0.821582	0.0012979
RHBDF2	0.821384	0.00107146
MMP2	0.820484	0.00510915
EFNA1	0.820481	0.00603371
BNIPL	0.820376	0.00486719
G6PD	0.817318	0.00679366
DECR2	0.816735	0.000292166
HOXC4	0.816431	0.000385669
IL27	0.814971	0.00918058
GUCD1	0.814736	0.0014936
TRPV2	0.814427	0.000288247
TSFM	0.813992	0.00585638
IKBKB	0.813885	3.37946e-08
CEP85	0.813548	0.000229758
TM6SF1	0.813223	0.000469671
PRR5L	0.813219	0.00709153
GIPC1	0.812363	0.000160661
TSSC1	0.812056	0.00220665
ARHGDIB	0.811063	0.00176196
CDR2	0.808207	0.00148258
RP11-303E16.2	0.807225	0.00636008
ANO9	0.807151	0.000755408
ARSG	0.80695	0.00178166
KCNAB2	0.806419	0.00873903
TIMP1	0.804971	0.000556966
SHISA4	0.804859	0.000259731
TOR3A	0.804188	6.22472e-06
FAM45A	0.803626	0.00103292
TMEM110	0.803404	0.00062151
SCARF2	0.80338	0.00902692
TRPS1	0.802622	0.00875042
PDE4A	0.801885	0.00307971
PFKFB4	0.800992	0.00239288
IMPDH1	0.799671	0.000446207
ACOT7	0.799358	0.000922347
ZNF174	0.798621	0.00294866
IRF5	0.796831	0.00562185
SPAG5	0.796471	0.00619846
PAPSS2	0.795488	0.00799204
LPCAT1	0.794829	0.000409817
SHOC2	0.794093	0.000825506
CYB561D2	0.793142	0.0061487
SDCBP	0.793018	0.00215135
PLA2G15	0.792151	0.00349744
SPATA33	0.792088	0.000295308
KIAA1211L	0.791398	0.00657403
YWHAH	0.789923	1.18852e-05
YKT6	0.789721	0.00158785
SCAMP3	0.789666	0.00154006
TPGS2	0.789518	0.000787205
TMC6	0.788963	6.19169e-05
SHKBP1	0.78641	0.000160386
MGAT4A	0.786195	0.0104394
SLC6A9	0.785785	0.00669576
SLC35F6	0.784908	0.000364566
MARCH2	0.783569	0.00133436
TNS3	0.782532	0.000282287
MAGED2	0.78218	0.00472056
ABI3	0.780874	0.000903068
KIAA0556	0.780672	0.0021135
SLC20A2	0.78055	0.000110221
SLC39A13	0.779364	0.000706307
COMMD4	0.778962	0.00443114
ARPC3	0.778901	2.689e-05
PRDX1	0.777965	0.00538692
ARHGAP1	0.777729	1.90221e-05
LEPREL2	0.777588	0.000638322
SHISA5	0.77741	0.001013
VEGFA	0.777343	0.000307519
PILRA	0.777168	0.00543598
CREB3L4	0.776363	0.0073933
SYNGR2	0.776283	0.00505513
KIF22	0.77576	0.000666363
PSMD4	0.775755	0.00330271
TIMELESS	0.77493	0.00626968
POLR2K	0.774207	0.000943685
TMEM104	0.774151	0.000275931
YIF1B	0.773014	0.000131424
ALDH3B1	0.77093	0.00263245
C7orf43	0.770748	0.000653638
GLI1	0.77043	0.00673947
TRAPPC9	0.769745	0.000343538
CLN3	0.76883	0.00548138
APH1A	0.768432	0.000127442
RP11-629O1.2	0.765935	0.00195189
OXLD1	0.765568	0.00354955
BRI3BP	0.764812	0.000376475
HSPA4	0.763968	0.000370944
H2AFJ	0.763538	0.00799864
MYH9	0.762406	2.30894e-05
OTUB2	0.762316	0.00452098
UHMK1	0.761613	0.000696799
TRIM11	0.760924	0.000718095
EIF4EBP1	0.7608	0.0100797
TAGLN2	0.759776	0.00137707
HCN3	0.759053	0.00149982
KLHL12	0.758289	0.000180049
FERMT3	0.75796	0.00947487
CTSD	0.757853	0.00638094
VPS37C	0.757688	0.000635105
HK1	0.757401	0.00146353
FIG4	0.756195	0.00183054
HELZ2	0.75519	0.00286986
TNFRSF18	0.755035	0.00659907
PCK2	0.754203	0.002837
ANKH	0.754163	0.000107605
EVPL	0.752674	0.00409434
CHPF2	0.751722	0.00100169
LRRC16B	0.751542	0.00774388
GATA2	0.750346	0.00214627
FAM83H	0.749225	0.000514521
ACOT2	0.749117	0.000309127
SHROOM2	0.748708	0.010517
CRELD2	0.74813	0.00111898
PDRG1	0.747307	0.00466915
SAMD1	0.74657	0.00814664
BBC3	0.746417	0.000302457
ARPC5L	0.745475	0.00158242
TMSB10	0.745367	0.00906264
KCTD5	0.745173	0.000522162
KIAA0586	0.744677	0.0030572
SLC39A1	0.744182	0.00240605
SH3GL1	0.740699	0.00230445
TOR2A	0.739692	0.0091151
PSMD2	0.739098	0.000782423
DTX2	0.736951	0.000243787
PSAP	0.736275	0.00182558
GDE1	0.735421	0.00143997
MBOAT2	0.735048	0.000302007
NADK	0.73334	0.00053381
FAM53B	0.733067	0.00285698
ADAMTS10	0.732988	0.00267611
PARP9	0.732122	0.00129029
RABIF	0.731172	0.000367895
NUDT16L1	0.730466	0.00085377
LOXL2	0.730237	0.00659685
CCDC125	0.730121	0.000970878
SPHK1	0.728928	0.00260915
UBA1	0.728295	0.00629222
ACP2	0.727468	0.000900224
ZDHHC24	0.727224	0.000638792
ADA	0.726988	0.00851292
CAP1	0.726388	0.00295864
UCN	0.72622	0.00439563
PDK3	0.726213	0.00338726
FAM195A	0.725751	0.00834193
PPP2R4	0.725196	0.00156314
RAB2A	0.724548	2.27405e-05
MAPKAP1	0.724289	0.000487093
FBXO25	0.723908	0.00940123
ATG9B	0.723779	0.00963871
PYCR2	0.723562	0.00132022
SLC50A1	0.722847	0.00188634
CCDC24	0.722254	0.00162721
FAM114A1	0.720961	0.00107104
CAPZB	0.719228	0.00187754
THOC6	0.718871	0.0105043
HLCS	0.718028	3.30155e-05
HHIPL1	0.717993	0.00549104
NDUFS8	0.717274	0.00173301
TCP11L1	0.716506	0.00127885
SEPW1	0.716108	0.00483856
NINJ1	0.715447	0.00308764
SOX12	0.714743	0.000344097
UNC93B1	0.714739	0.00184191
TRAF2	0.71386	0.000408351
FAM110A	0.713041	0.00869694
RFX5	0.712834	0.00210653
PHKG2	0.712168	6.95928e-05
UQCC2	0.712165	0.00349733
XPR1	0.709717	0.00125315
ALDH18A1	0.707937	0.00526728
HM13	0.707552	0.00478667
INTS9	0.707455	0.0101114
PISD	0.707365	0.00930954
CETN2	0.707343	0.00357569
RBBP7	0.705906	0.00409151
ZNF48	0.70577	0.00146126
IRF1	0.703873	0.00421372
BCL9	0.702146	0.00173822
ACRBP	0.700899	0.00422225
NME4	0.69863	0.00794085
TMEM241	0.697466	0.0102598
FARP1	0.696261	0.00806613
NVL	0.69622	0.00103406
GALNT10	0.695068	0.000285121
ARHGAP39	0.694081	0.00487483
ASAP1	0.694036	0.000338515
PLCB2	0.693225	0.00848218
SLC12A7	0.692904	0.00189673
PMVK	0.692825	0.00847192
C4orf48	0.691838	0.00568526
MRPL27	0.690475	0.00312515
PHF5A	0.689251	0.00516403
CTSB	0.689194	9.31984e-06
SLC19A1	0.688123	0.000413731
MRM1	0.687804	0.00902094
USP5	0.687772	0.00151379
TANGO2	0.687581	0.00171536
PLVAP	0.687274	0.00130281
RABAC1	0.687136	0.00298172
CLPB	0.687094	0.00744072
TMED9	0.686442	0.000803784
AK1	0.685546	0.00011791
INTS7	0.68523	0.00122976
C1orf170	0.684878	0.00538612
SFXN3	0.683886	0.000284805
TACO1	0.683719	0.00239989
TCIRG1	0.683563	0.00404305
GATC	0.683301	0.00130052
ARHGEF16	0.683174	0.00185981
NPTXR	0.683009	0.00977922
ARL6IP1	0.68276	0.000953458
GFER	0.682741	0.000981804
UBE2A	0.682008	0.000928593
COPG1	0.68163	1.31244e-05
ENY2	0.681074	0.00432391
RABEP2	0.680997	0.00069454
AP2M1	0.679833	0.00387695
TNFAIP3	0.678787	0.00781377
PHF19	0.678416	0.00703688
PDIA4	0.677351	0.000659479
FAM120A	0.676762	0.00252139
GRPEL2	0.676273	4.04949e-05
FAM127A	0.676024	0.00454152
KIAA0040	0.675984	0.00158263
SMPD1	0.675629	0.000294498
COG2	0.675506	0.00172618
CDC123	0.674207	0.00287851
TPI1	0.672793	0.00156842
KIAA1841	0.672647	0.0047023
ATP2A3	0.67182	0.00234284
FAM189B	0.670125	0.00556979
PSME3	0.670011	0.000133881
SKIL	0.669668	0.00965523
BLVRB	0.669666	0.007934
TGIF1	0.669454	0.00942447
ARPC2	0.669369	0.000323771
HNRNPAB	0.669308	0.00229857
GSR	0.668847	0.0085821
CNOT11	0.66814	0.00557735
PPM1H	0.668117	0.00853376
ZDHHC12	0.667782	0.00449922
DDX58	0.667109	0.00546546
LYPLA2	0.666849	0.00279447
FTSJ1	0.665903	6.38488e-06
LAMA5	0.664823	0.000193493
EFHD2	0.663986	0.000280066
NME3	0.66134	0.000738493
NME1	0.661007	0.00317445
KIAA1279	0.660795	0.00103857
MBOAT7	0.660252	0.00295672
PTPN6	0.659658	0.00106943
AMDHD2	0.659629	0.0072597
ZMIZ1	0.659151	0.000970081
ZNF71	0.659084	0.00615812
GATAD2B	0.658579	0.00323191
KCTD15	0.658537	0.00334567
RAB8A	0.658522	7.71157e-05
PRR13	0.657713	0.0019496
DGKD	0.657695	0.00357933
MEIS3	0.657363	0.00331754
RAB7A	0.657167	0.000397528
DTYMK	0.656228	0.00469745
FMNL3	0.655326	0.000151255
DERL1	0.654834	2.37725e-06
TOR1A	0.654332	0.000684801
MRPL17	0.653634	0.00126674
PARP14	0.653547	0.00589056
WBP1L	0.653383	0.00164156
VCP	0.652995	0.000977957
ACTB	0.652938	0.00260946
ASNA1	0.652825	0.000598302
ERH	0.652536	5.726e-07
SH3TC1	0.652365	0.000580127
ARF6	0.651757	0.00998672
ARMC1	0.651354	0.00491446
ACTR1A	0.651017	0.00124757
NEIL2	0.649762	0.00710294
MYO6	0.649579	0.00298239
SURF4	0.649479	2.80838e-05
ARF1	0.648576	4.52925e-05
NAA60	0.646111	0.00217027
ARHGAP30	0.646057	0.00782787
AC008132.13	0.645625	0.000795228
HN1L	0.645402	0.00230536
ICA1	0.644025	0.00946756
ACP1	0.641219	0.000114044
CKLF	0.641181	0.000879063
NR2F6	0.640896	0.0031816
ZFAND3	0.640558	0.000746116
MEF2D	0.639808	0.00843913
SLC35A2	0.639231	0.00547096
P2RX4	0.639031	0.00387436
ADAR	0.636807	0.000702358
SUV420H2	0.636472	0.00185349
MAFB	0.636152	0.00837224
DOLK	0.636142	0.0023808
SCO2	0.635347	0.00489361
PI4K2A	0.63531	0.00357898
LMNB2	0.634978	9.97968e-05
YWHAB	0.634235	0.00314501
PCBD1	0.633408	0.00766243
SLC25A10	0.633272	0.00488467
PHPT1	0.633188	0.00147127
CASP3	0.631633	0.00333312
RP11-452L6.5	0.629529	0.00985871
ITGAM	0.629523	0.0102253
NPLOC4	0.629502	0.00166436
TBK1	0.629303	0.00663707
INSIG1	0.62813	0.00388746
GTF2IRD1	0.627745	0.000142104
NAP1L4	0.626941	0.00173634
PSMD8	0.626464	0.00157132
PDE6D	0.625639	0.00732826
TNFAIP1	0.62511	0.0057834
BCKDK	0.624971	0.00146449
UROS	0.623944	0.00175024
ST3GAL4	0.623084	0.000243497
RER1	0.622786	0.00149585
HUS1	0.621932	0.000508777
NDRG3	0.621405	0.00884742
ORAI2	0.620543	0.00331154
IRF6	0.619737	0.00343169
TNK2	0.617284	0.00419456
WDR90	0.616147	0.00640929
ZNF687	0.616141	0.00804623
PCNXL3	0.615232	0.00988756
YIF1A	0.61483	0.00241095
PARVA	0.613442	0.00126507
MEGF9	0.612779	0.00895707
ICT1	0.612513	0.00725883
PREB	0.611222	0.00509054
RAB11FIP3	0.609642	0.000300419
COL18A1	0.609163	0.00135979
PCYT1A	0.608852	0.00052823
PYGO2	0.607476	0.00909021
COPA	0.607368	9.62981e-05
SLC2A4RG	0.606973	0.0048649
ZNF672	0.605658	0.000836833
PTK2B	0.604898	0.00419329
PSMG3	0.604518	0.00938638
PHF12	0.602899	0.000635433
KDM5B	0.602822	0.00127811
C11orf24	0.602227	9.88531e-05
USP39	0.600614	3.08044e-05
PIGN	0.599802	0.00815226
SHARPIN	0.599715	0.00239216
CORO7	0.598914	0.000353717
SLCO2A1	0.598855	0.00576116
HMOX2	0.596278	0.00477548
SRCAP	0.595535	0.00856672
CSK	0.59416	0.00107692
YDJC	0.594158	0.00703582
SLC25A16	0.594003	0.000336903
YARS	0.593309	0.00172955
FAM50A	0.592007	0.00104215
TWF2	0.591846	0.0028606
RAP2B	0.589185	0.00289464
CLEC11A	0.588157	0.0056993
IPO13	0.58619	0.00877547
CUX1	0.585372	0.00645057
TXNL4A	0.585086	0.000616442
RHBDD3	0.584949	0.00116146
DVL3	0.583987	0.00203734
RHOC	0.583892	0.00688167
REXO2	0.581999	0.00185946
ANXA2	0.581643	0.000980308
TFDP2	0.580906	0.00192174
PARP1	0.580222	0.00159455
OTUD7B	0.578988	0.000373754
TRPM4	0.578919	0.00514853
GPR4	0.578899	0.00495624
AXL	0.577612	0.00792221
RPUSD1	0.577496	0.00384702
ALAD	0.577253	0.000602247
FXYD5	0.576452	0.00842825
COPE	0.576355	0.00766205
ZNFX1	0.575408	0.00272496
EFTUD2	0.574769	0.0100781
SRA1	0.573191	0.00167107
43168	0.573168	0.000134573
TMEM189	0.572675	0.00761767
GAA	0.569712	0.00343145
JOSD2	0.568692	0.00867242
CHST15	0.568219	0.00102208
B4GALT2	0.566975	0.000398466
CTTN	0.566143	0.00052833
CRTC1	0.56597	0.00152957
SAR1A	0.565576	1.35724e-06
RPS6KA1	0.565302	0.00524917
WDR92	0.565269	0.00719167
GOSR2	0.564907	0.00533368
STK10	0.564344	0.00305706
VPS72	0.564205	0.00575301
GPI	0.563904	0.00194888
SLC38A7	0.563027	0.00798933
SEC22B	0.562073	0.00550475
MAPK9	0.562057	0.00151549
EFR3A	0.561793	0.0015442
TMCO1	0.560908	0.00222914
MYD88	0.560025	0.00835981
LZTR1	0.558192	0.0101046
MICU1	0.557512	0.00744158
C9orf91	0.557037	0.0086808
MOGS	0.55683	0.00738585
PGAM5	0.555834	0.00688835
MICAL1	0.553103	0.00243766
CNPPD1	0.550852	0.0065102
TRIM41	0.550794	0.00216341
ISG20L2	0.550517	0.00536026
TM9SF1	0.550382	0.00522442
DPP9	0.549627	0.00168065
UBE2F	0.547436	0.0036194
EMC9	0.547043	0.00718903
TMEM87B	0.545996	0.00566507
UBAP2L	0.545562	0.00248652
DAPK3	0.545487	0.00983495
MEF2BNB	0.544243	0.000441965
MRPS11	0.543997	0.00297678
POMT2	0.540806	0.00461403
R3HDM4	0.540105	0.0084093
PIGC	0.539605	0.00363221
TONSL	0.539524	0.0102381
ZKSCAN5	0.539387	0.00492611
DHTKD1	0.538632	0.00903788
ATP5E	0.537159	0.00513657
DBNL	0.536802	0.00248711
EHMT1	0.535229	0.00484146
PIN1	0.534811	0.00813206
CEP104	0.534696	0.000406343
RAC1	0.530602	0.00167399
MAP4	0.530355	0.00765782
DNAJB11	0.528855	0.00160865
UBALD1	0.528808	0.00428893
KIAA0930	0.528141	0.00205044
GSDMD	0.527967	0.00270291
GRAMD1A	0.525177	0.00440025
DCTN5	0.525098	0.000924163
TSPAN17	0.524555	0.00422014
MPV17	0.524477	0.00407715
GALNT2	0.524101	0.00399906
B9D2	0.523269	0.00723156
ASPSCR1	0.523014	0.00209362
LRRC1	0.521631	0.000526935
PLXND1	0.521571	0.00620028
PLXDC2	0.521413	0.0098457
SFI1	0.520276	0.00642945
UBE3C	0.520104	0.00017319
CKAP5	0.518234	0.00100907
FAM32A	0.517838	0.0101921
ADIPOR1	0.516042	0.00523632
FBLIM1	0.514888	0.0085951
IKBKE	0.512978	0.00654867
SPATS2	0.51274	0.000461079
RFC2	0.512596	0.0101749
DAP	0.512511	0.0087208
KLHL17	0.504971	0.00457509
BCAP29	0.503336	0.00136328
MOV10	0.501976	0.0074994
PASK	0.501468	0.00407908
RAB5C	0.499895	0.00342931
EIF1AD	0.498956	0.0067408
VTI1A	0.498584	0.000249158
H2AFY	0.498115	0.00365963
YIPF2	0.496517	0.00935054
PSMD11	0.494753	0.00630799
CALM1	0.494432	0.00417955
DCAF6	0.490917	0.00285293
SNAP47	0.490822	0.0100056
AGPAT3	0.490498	0.00118486
FAM168A	0.490028	0.003994
MAPK8IP3	0.488955	0.00890142
CARM1	0.48823	0.00848727
PSME1	0.486206	0.00126071
PAK2	0.481479	0.00637721
CEP89	0.478752	0.00616988
MAP7D1	0.478741	0.0103679
HDGF	0.47853	0.000749002
CHFR	0.476484	0.00821104
OGG1	0.475062	0.00773012
SIRT6	0.473836	0.00129136
SQSTM1	0.470459	0.00590494
VPS39	0.468874	0.000658912
LARP4B	0.463423	0.00225822
CLPTM1L	0.462269	0.00220367
KCTD17	0.461025	0.00843927
ZNF513	0.460515	0.00812684
MTA3	0.46018	0.00854168
COPS7A	0.453089	0.00353454
ODF2	0.452053	0.00111388
HNRNPU	0.450065	0.000691074
PSMA7	0.447909	0.00426378
AK2	0.44372	0.00445393
SPECC1L	0.442401	0.00376805
FBXW2	0.422742	0.00972353
CCDC127	0.407977	0.00890357
SEC13	0.406291	0.00851004
IQSEC2	0.403514	0.00669392
UBE2H	0.399053	0.00537473
SEC61A1	0.393378	0.00921794
ELAVL1	0.384296	0.00120634
TP53BP1	0.360848	0.00571348
GTPBP3	0.334599	0.0103117
ARIH2	0.311063	0.00526865
GBF1	0.309976	0.00933486
LY6D	0.239133	5.13216e-06
MCOLN3	0.208283	0.00527788
LHFP	0.205495	0.00113255

## Sheet: STAR_EdgeR_up_IDC_vs_Normal
Gene ID	log2FC (IvN)	p-value
DSCAM-AS1	6.5796	4.74018e-11
MMP11	6.50313	1.16013e-18
COL10A1	5.44349	4.24263e-18
BEX1	5.17997	5.8696e-08
GJB2	5.0795	1.7319e-14
GRM4	4.82615	2.95455e-10
CST1	4.55114	4.59637e-07
PPAPDC1A	4.37438	1.94895e-13
EDN2	4.10702	1.79156e-11
KLKP1	4.10034	7.61405e-13
S100A7	4.09311	9.44037e-06
MS4A15	4.00483	4.58579e-06
C2orf54	3.98994	3.2317e-08
PVALB	3.92589	2.65301e-07
CLEC3A	3.92533	1.9048e-05
TUBB3	3.91898	2.14348e-14
CST2	3.80985	1.82321e-08
INHBA	3.80774	1.69475e-20
CXCL9	3.65764	4.01581e-09
KLK4	3.64824	2.40037e-15
NKAIN1	3.57702	8.78136e-08
DLX2	3.5541	1.69247e-06
SYNDIG1	3.54355	3.08622e-09
LRRC15	3.5224	3.58637e-07
MATN3	3.47362	1.95848e-11
LINC00202-1	3.46944	6.77325e-08
S100P	3.44966	5.11824e-06
PYDC1	3.42117	6.49253e-05
CYP2B7P	3.41357	7.73291e-07
CYP4Z1	3.35065	7.82847e-06
WISP1	3.33653	4.72658e-09
TNNT1	3.30827	8.14417e-06
COL11A1	3.29393	4.15969e-05
COL8A1	3.21218	2.69223e-11
UBE2C	3.20496	1.16265e-09
NEURL1	3.1657	2.26673e-07
RUNDC3A	3.14607	3.82385e-07
SLURP1	3.12674	4.0456e-05
CYP4F8	3.06573	0.00128374
CST9	3.04935	0.00100377
EEF1A2	3.01174	4.63566e-08
TCN1	3.00347	1.57582e-05
P4HA3	3.00196	1.83583e-05
C8orf34	2.97708	0.000276735
KCNF1	2.91533	9.82617e-06
PROC	2.88606	1.20048e-10
GDAP1	2.80893	8.92542e-08
SYN1	2.76976	5.31211e-09
AIM1L	2.76708	1.56893e-08
KIF26B	2.76572	4.19763e-08
BIRC5	2.74712	3.71469e-09
TPX2	2.74358	4.8044e-09
PPP2R2C	2.74322	9.15663e-06
ARTN	2.73288	2.26257e-09
CTHRC1	2.70907	4.7064e-07
CLEC5A	2.70727	1.41859e-09
KCNK15	2.70308	2.60559e-09
PYY	2.66328	2.14188e-05
ISG15	2.66202	1.86183e-10
GABRD	2.65489	7.7777e-15
ADAMTS16	2.645	1.6827e-07
TMEM145	2.62414	2.60303e-09
TK1	2.62013	5.83616e-10
CCDC19	2.57237	2.39363e-10
IGHG3	2.56316	2.40265e-08
CNTD2	2.55561	1.4875e-05
BGN	2.55107	8.27937e-09
IGHGP	2.54982	7.63969e-06
CYP2T2P	2.5473	2.58545e-05
LBP	2.52873	0.000584772
DCD	2.52033	0.00384476
UNC5B	2.51432	2.13843e-11
IL21R	2.50728	8.60909e-09
ASF1B	2.49417	6.40582e-10
COMP	2.48304	0.00631394
C2CD4A	2.47984	0.000171046
CILP	2.469	8.64236e-11
DLX1	2.45529	0.000797486
ANKRD22	2.4409	2.79136e-08
SDS	2.43896	1.17015e-06
MMP9	2.43125	1.09366e-05
IGHG4	2.42694	0.00210932
AL391421.1	2.41772	7.767e-05
ADAMTS14	2.41659	1.2475e-06
TOP2A	2.40337	2.63046e-06
IGHG2	2.3973	8.93624e-05
CCDC78	2.39322	1.3477e-09
CACNG4	2.39128	1.28097e-07
MYBL2	2.39073	9.32839e-08
AC018816.3	2.38287	1.00327e-05
AC009005.2	2.3589	8.80318e-07
CNTNAP2	2.35302	9.83981e-05
HOXC11	2.35107	3.44377e-06
DEGS2	2.34493	3.75333e-08
CEACAM6	2.34407	0.000249403
CLPSL2	2.33809	3.5248e-05
TSPAN1	2.33764	4.35405e-06
CSMD2	2.32955	6.05659e-08
CCDC151	2.32787	3.04636e-06
RBM24	2.32145	0.000370595
OASL	2.32074	2.06134e-08
CLPSL1	2.31639	9.94378e-07
ASPN	2.30583	0.00631062
COL5A1	2.30488	1.16099e-07
KRT86	2.3021	4.18921e-05
PITX1	2.30141	5.39523e-05
CILP2	2.29867	0.0165372
SORCS2	2.29413	1.67674e-10
NRIP3	2.29196	2.14314e-06
LAMP5	2.2788	1.16472e-06
CASP16	2.2774	9.14336e-06
OAS2	2.2737	4.23892e-08
SAMD11	2.26733	2.1588e-05
SPOCD1	2.26622	6.36662e-07
CRIP1	2.26385	2.49261e-08
TSPAN15	2.25842	7.35761e-09
C5orf46	2.24034	2.69778e-05
CORO6	2.23342	9.66458e-08
GREB1L	2.23009	1.46979e-08
MKX	2.22294	0.000834395
CST6	2.22062	1.21393e-08
IFI6	2.21893	3.3956e-07
ZMYND10	2.21628	4.85739e-07
IFI27	2.20612	6.21047e-08
GRIN2D	2.20455	3.43954e-08
CCNO	2.19875	5.52555e-08
MISP	2.19602	7.49092e-06
ATP8A2	2.18124	9.5411e-05
COL1A1	2.16944	5.63937e-06
RGS1	2.16556	9.96199e-08
AC110619.2	2.16164	7.05504e-06
GAPT	2.16078	4.62457e-08
CYP4B1	2.15671	1.77214e-05
LOXL1	2.12205	1.17675e-09
RIMS4	2.10916	5.34819e-08
CXCL10	2.10455	0.00145829
FGD3	2.10275	4.89291e-09
SUSD3	2.1027	1.23311e-06
DNAAF3	2.09927	5.71288e-08
SULF1	2.08115	1.06193e-08
PTTG1	2.0778	6.01738e-07
SLC1A1	2.07378	1.15641e-05
MKI67	2.07303	1.43433e-05
NAT1	2.07037	0.00170648
HLA-DQA1	2.06363	0.00952222
CCNB2	2.06109	1.26946e-05
LILRB4	2.05854	1.98157e-07
NINJ2	2.05848	3.63188e-07
ERP27	2.05754	9.8735e-05
BCAS4	2.05114	1.35108e-07
CCDC64	2.04837	4.27174e-07
AC109826.1	2.04717	2.42537e-07
FNDC1	2.03764	0.00820385
LRRC46	2.03295	3.93004e-09
HN1	2.01629	6.05253e-12
NUSAP1	2.01475	2.42745e-06
MIAT	2.01305	1.50442e-08
SDC1	1.99675	2.66484e-13
MICAL2	1.98169	6.17042e-08
PLA2G2A	1.97821	0.000848981
RAB31	1.97735	1.02941e-08
ZNF469	1.97047	6.92875e-12
MUC6	1.97026	0.00750648
SBK1	1.96944	4.03208e-08
GPRC5A	1.96784	4.85582e-08
C1QTNF6	1.96759	1.22112e-10
MAPK8IP2	1.96477	7.20629e-08
MUC1	1.96135	2.6975e-08
SPARC	1.95999	1.87027e-06
CTXN1	1.95622	7.79742e-07
LY6H	1.94779	8.88224e-06
WNT7B	1.9472	2.5477e-07
KIF2C	1.94481	1.27842e-05
NOX4	1.94287	1.40004e-05
THBS4	1.93375	0.0148041
IFI44L	1.93176	1.16505e-06
TFR2	1.93015	4.88967e-06
PTCHD2	1.92437	6.47935e-05
FN1	1.92189	5.12874e-05
AC093642.3	1.92178	1.24862e-05
CCR7	1.91691	6.43948e-05
CCL19	1.91349	3.9718e-05
NKD1	1.91278	3.29435e-05
TMC5	1.90913	7.71751e-07
FBN1	1.90709	3.93083e-07
CAPN13	1.90701	2.06007e-07
RND1	1.90396	2.3509e-05
RLTPR	1.88831	4.73073e-07
TINCR	1.88717	9.63194e-06
CATSPER1	1.88331	1.59777e-06
DPEP1	1.88114	2.46521e-05
RSAD2	1.88037	8.32414e-07
FOXP3	1.87824	9.53815e-06
MSMB	1.87653	0.00681021
GALNT6	1.87275	3.50592e-07
CFB	1.86744	0.000181246
RP11-263K19.4	1.86666	3.28467e-07
TROAP	1.86485	4.99636e-05
RSPH1	1.86415	4.97362e-07
HTRA3	1.86405	3.39552e-09
DISP2	1.85917	0.000150626
TPRG1	1.85789	0.000211851
HAGHL	1.85737	4.7313e-10
LINC00176	1.8515	6.52847e-09
HOXA11-AS	1.84974	0.000166003
OLFML2B	1.84582	7.62019e-07
ARSI	1.84526	2.95608e-09
HES6	1.84263	3.48119e-10
CENPM	1.8421	2.4857e-06
RP11-54O7.3	1.83572	8.73324e-06
CDC20	1.83219	2.0039e-05
PGM2L1	1.82549	3.02701e-08
LINC00475	1.82438	1.78674e-05
SSTR2	1.82299	0.00030588
OAS3	1.81022	4.42629e-06
GLYATL2	1.79545	0.0103814
F7	1.79208	0.000132343
LINC00152	1.79112	8.83354e-06
CREB3L1	1.79025	1.87185e-07
SLC16A3	1.78879	1.42845e-10
FAM155A	1.78733	1.17938e-05
RP3-439F8.1	1.78454	0.000107098
IGSF9	1.78103	1.83592e-07
ANXA9	1.77852	1.34814e-05
SPEF1	1.7776	1.3049e-05
CACNA1H	1.77215	2.52319e-05
COL12A1	1.7698	0.000224061
TTC16	1.76797	5.0403e-07
SIX2	1.76788	0.00157263
OAS1	1.76573	7.04569e-06
PCSK1N	1.76074	0.000976781
TPSG1	1.75871	0.00397995
CCDC74A	1.75763	0.00213308
PYCR1	1.75619	1.10186e-05
ITGA11	1.75052	1.89328e-06
HSPB1	1.75011	3.02329e-07
THY1	1.74973	4.62109e-07
SCUBE1	1.7453	0.00187061
UNC5A	1.74525	0.000270331
SLAMF8	1.73482	1.55305e-05
IL4I1	1.72904	6.76298e-08
PMEPA1	1.71562	1.09081e-10
CDKN2A	1.71376	4.9674e-07
RP11-496I9.1	1.71273	6.45123e-06
FCGR3A	1.7119	0.000379657
RP11-503N18.1	1.70296	0.000607058
MAPK15	1.6949	0.00129627
MRPS30	1.69486	0.000539037
IFITM1	1.69466	0.000111658
CAPS	1.69275	8.90404e-09
SERPINA11	1.6898	0.00882949
IL1RN	1.68608	0.00139321
SLC4A8	1.68564	2.36714e-05
RP11-379F12.3	1.68373	0.000562949
ANTXR1	1.68372	2.25275e-06
PDE6G	1.67813	4.74364e-06
NFAM1	1.67336	2.98107e-08
PLAUR	1.67291	5.68474e-06
SMYD3	1.66853	4.45428e-05
ENC1	1.66615	2.89496e-07
TMPRSS6	1.66498	0.00734512
RRM2	1.65876	0.00261796
NOV	1.64938	0.0211865
C1QTNF3	1.6393	0.00832979
CHST1	1.6381	1.47352e-05
CDCA3	1.63435	6.78297e-05
FADS2	1.62939	0.000344171
AURKB	1.62926	0.000252001
CRAT	1.62845	1.55064e-05
E2F1	1.62515	8.62485e-07
COL1A2	1.62476	0.00130201
TEKT5	1.6221	0.000871231
TUBA1C	1.61827	2.17299e-07
P2RY6	1.61528	9.04178e-08
MX1	1.61454	5.63333e-05
ZWINT	1.61275	8.03574e-05
C9orf116	1.60282	6.84934e-06
SCGB1D2	1.60165	0.0183413
IQGAP3	1.60017	0.00041944
SFRP2	1.59908	2.21795e-06
AC079776.2	1.59884	0.0132945
GLA	1.58829	0.00406549
ELN	1.58766	6.27457e-06
S100A14	1.58563	6.68995e-06
NREP	1.58205	3.65858e-06
SPC24	1.58122	0.000143204
PARD6A	1.581	2.09969e-06
CELSR3	1.57915	5.4234e-08
TLCD1	1.57757	2.91795e-06
EDIL3	1.57689	0.0122692
SIX1	1.57508	0.00079553
NPNT	1.57267	1.87484e-06
FBXO6	1.57261	5.95744e-08
DNAAF1	1.57246	4.1643e-05
EVL	1.56963	1.07522e-06
GXYLT2	1.56749	0.00055754
AC005355.2	1.56652	0.00321664
FOXS1	1.5655	1.158e-06
SCIN	1.56549	0.00121873
CDK1	1.56393	0.000111336
PAX2	1.56052	0.00640155
SPAG1	1.55984	3.89699e-07
RP11-368J21.3	1.55945	3.36252e-05
HOXC10	1.55933	0.000161031
AKR7A3	1.55443	0.000395691
C16orf59	1.55261	4.07217e-07
OAZ3	1.54954	7.11006e-06
RP11-123K19.1	1.54876	0.000490652
SPP1	1.54691	0.00213618
ITGBL1	1.54632	1.4005e-06
CXCR3	1.54562	0.000150818
FPR3	1.54552	0.000171936
SERPINE1	1.53879	0.000996878
NXPH4	1.5382	0.00234684
KIAA1467	1.53683	4.86257e-05
RARRES3	1.53347	2.63473e-06
OTOA	1.53133	0.000112183
RP11-53O19.1	1.52944	0.0303842
SLC40A1	1.5278	1.40741e-06
E2F2	1.52459	5.80244e-05
EFCAB12	1.52387	0.000112368
IGFALS	1.52125	0.00170177
GATA3	1.51731	1.01257e-05
PYCARD	1.51614	1.62064e-08
UNC5B-AS1	1.5112	0.000102527
OVOL1	1.51113	0.000351182
C9orf169	1.50629	1.09394e-05
PLAU	1.50449	3.25506e-05
ECM1	1.49914	4.76505e-06
HOXC-AS3	1.4991	0.00298743
EVI2A	1.49816	0.00207381
SYCE3	1.49571	0.00107931
EPHB2	1.49235	2.02058e-05
CHAD	1.48643	0.0117534
MORN3	1.48233	0.000103999
IGSF21	1.48127	0.00125349
WDR62	1.47634	8.15893e-07
COL3A1	1.47519	0.00441565
FOXO6	1.47442	5.1844e-07
LYZ	1.47408	0.00163132
KRT8	1.4718	9.0195e-06
RAMP1	1.47156	1.91429e-05
CCDC109B	1.47119	4.59174e-07
KRT81	1.46616	0.0129752
PTPRT	1.46429	0.000769105
RHOD	1.4641	6.31735e-06
PCSK6	1.46399	0.00405718
PLK1	1.46248	2.47573e-05
AEBP1	1.46104	8.1769e-06
STMN2	1.45943	0.00030558
MSC	1.4504	3.85035e-06
CENPP	1.44945	0.000130801
SRPK3	1.44503	0.000692192
IGHG1	1.44387	0.0110174
PDCD1	1.44217	0.000264162
SCUBE2	1.44198	0.00252179
HIST1H1C	1.44094	9.62883e-05
RELT	1.44068	9.77911e-07
PLA2G2D	1.44046	0.00721327
CD300LF	1.43967	6.12669e-05
CSDC2	1.4364	1.20284e-06
BIK	1.43516	2.25937e-05
FUT2	1.43486	6.79086e-05
UGCG	1.43127	0.000201664
RP11-150O12.6	1.43125	0.00320956
IRF7	1.43021	4.39423e-09
KLHDC7A	1.42793	0.00729897
PSCA	1.42742	0.0257988
B4GALNT1	1.42552	1.68127e-05
LINC00861	1.42544	0.00130924
SERPINH1	1.42389	6.14896e-07
TMEM63C	1.42138	6.12842e-06
HOTAIR	1.41885	0.00427819
VOPP1	1.41748	8.42204e-06
LBX2-AS1	1.41668	5.37112e-05
SLC16A6	1.41665	0.0111002
CLDN9	1.41401	0.000154017
ATP10A	1.41394	7.7539e-05
B4GALNT4	1.41175	2.39121e-07
SIX4	1.41149	0.000114733
LEF1	1.41061	0.000310885
GTSE1	1.40201	0.000311507
ARSB	1.39954	9.10986e-06
PCDH17	1.3965	1.38731e-06
IFI35	1.39366	1.10195e-05
SLC7A4	1.38859	0.0180147
CAPG	1.38798	1.43895e-06
SH2D4A	1.38758	6.54044e-05
RBP5	1.38637	0.000454447
SPIB	1.38605	0.00371882
CYFIP2	1.38582	4.14412e-08
HPN	1.38346	0.000717811
TMEM132A	1.38344	4.10365e-05
RP11-465N4.4	1.38287	7.51182e-05
DOK7	1.38231	0.00293031
CRABP2	1.38225	0.000200235
MS4A7	1.38221	0.000337949
FAM183A	1.38141	0.00994899
LINC00160	1.37738	0.00228099
RP11-295G20.2	1.37566	0.000589635
DPYSL3	1.37433	7.90302e-07
MIR210HG	1.37257	1.25734e-05
GINS2	1.37111	0.00300724
IQCD	1.37088	8.44018e-05
ADAM19	1.37077	5.13776e-06
C1QB	1.36854	0.000106786
VSTM2L	1.36778	0.00113704
S100A11	1.36571	4.65773e-05
SLC29A3	1.36532	5.66483e-06
GLIS2	1.3636	5.21225e-06
CTD-2319I12.1	1.36033	0.000105738
PODNL1	1.36012	1.2832e-06
ADC	1.36006	2.8011e-08
TACC3	1.35956	1.03279e-05
XG	1.3567	0.0265945
CIITA	1.35435	1.45598e-06
STK32B	1.35398	0.000231813
CTD-3193O13.9	1.35306	1.50772e-05
EOMES	1.35192	0.000916666
PAFAH1B3	1.34751	7.09445e-08
TTLL12	1.34655	1.52822e-05
TPRN	1.3436	1.55521e-07
RGS11	1.34225	5.63196e-05
EPSTI1	1.33905	0.000345563
REEP1	1.33838	7.06707e-05
LAPTM5	1.33388	2.53173e-07
LLGL2	1.33271	9.95568e-07
F2RL3	1.33185	0.000221994
LRRC32	1.32854	4.57285e-07
BST2	1.32853	0.000109888
FBXL16	1.32836	0.000854645
EME2	1.32593	8.68934e-08
POLD4	1.32329	3.87093e-06
IL18	1.32201	0.000109011
TRAC	1.31845	0.00107474
N4BP3	1.31802	1.49579e-06
C1QC	1.31408	0.00173848
SLAMF9	1.31265	0.00424175
SELPLG	1.31151	0.000122035
CHRD	1.30724	9.77333e-06
PSMB9	1.307	0.00286772
NEFH	1.30538	0.000141271
ETV7	1.305	0.00211293
SAMD14	1.30315	9.45572e-06
POLR3K	1.30103	4.7e-06
LINGO1	1.2993	0.000795912
GDF15	1.29896	0.00202359
COL8A2	1.29891	0.000814142
TGFB1	1.29879	9.11377e-06
SLC2A6	1.29864	8.60193e-06
PXDN	1.29849	1.65537e-09
OSM	1.29804	0.0125927
COL5A2	1.29668	0.00457397
ECT2	1.28931	7.56272e-05
RDH16	1.28712	7.69022e-05
UCHL1	1.28705	0.000319725
SIM2	1.2859	0.000336099
RHBDL1	1.2855	4.71086e-06
RAB26	1.28112	9.05035e-06
CA12	1.28048	0.000141452
RTN1	1.27886	0.00446633
LAGE3	1.27847	0.000178566
SLC7A8	1.27727	8.27816e-05
PRR15	1.27688	0.00045948
RP11-480I12.5	1.27629	0.000221761
C6orf1	1.27539	1.11743e-06
PARD6B	1.2747	0.00491436
CHPF	1.27189	3.27854e-09
DOPEY2	1.27148	1.4789e-08
LAT2	1.27103	9.95052e-07
ZNF668	1.27037	1.0517e-08
AC005077.14	1.26694	0.00839978
STAT1	1.26668	8.50354e-05
ZNF467	1.26642	1.83228e-07
SPI1	1.26468	0.000142611
OSCAR	1.26462	5.39478e-05
RHBG	1.26319	0.00344874
COX6C	1.26235	0.00342234
TTLL9	1.26235	0.00020498
CNIH2	1.2622	2.85889e-06
AP001007.1	1.26173	0.000104214
BASP1	1.26135	0.000236716
REEP4	1.26134	1.03779e-06
HMGB3	1.25991	0.000481551
ITGAX	1.25785	9.99311e-05
MB	1.2578	0.000550557
RHEBL1	1.25667	6.70817e-05
ZNF385A	1.25632	7.05587e-05
SLC7A5	1.25623	0.000102625
MAL2	1.25355	0.000451097
RHPN1	1.25214	1.19115e-07
TUFT1	1.25181	0.000457061
TYROBP	1.2518	0.000329552
B4GALNT3	1.25131	0.000624711
PGP	1.25074	4.14038e-07
FAM159A	1.24942	5.75046e-05
TGFB2	1.24911	0.000469858
CERCAM	1.2472	9.18992e-05
TSPAN2	1.24686	0.0305598
F12	1.24585	0.000140135
SLC15A3	1.24543	1.03947e-05
COL6A3	1.24415	0.000668511
CD74	1.2439	5.93242e-05
COL6A1	1.24234	1.34612e-05
TPM3	1.24158	7.6273e-05
PLA2G4F	1.24094	0.000438556
TYMP	1.23844	3.36954e-07
DENND1B	1.23633	0.000136089
SEMA7A	1.23605	3.22075e-05
NUPR1L	1.23484	0.00135648
CCDC153	1.23463	4.36571e-05
SLC38A5	1.23078	5.3118e-05
BCAS1	1.21826	0.00297728
SPOCK2	1.21777	0.00039722
CD3D	1.21771	0.00209909
ABHD2	1.21369	2.97496e-05
PRRT3	1.21329	2.04238e-06
SLC12A8	1.21097	0.000521466
TGM2	1.20771	0.000519915
CXCR4	1.2064	0.00357507
ARNTL2	1.20592	0.00365515
C9orf89	1.20373	0.000314831
LRRC10B	1.2035	0.000695692
MIR4435-1HG	1.20348	0.000343101
WDR65	1.20306	0.00266202
CBS	1.20279	0.00319966
PPM1J	1.20028	0.00294943
GADD45G	1.1995	0.000276545
CD48	1.19761	0.00698216
TMEM191C	1.19756	0.00107493
LINC01094	1.19704	0.000659463
TP53I11	1.19702	6.6068e-05
TREM1	1.19554	0.0133631
GALE	1.19541	4.548e-05
DPP3	1.19524	5.797e-05
TRIM46	1.19406	0.000144925
ATAD2	1.1929	0.000313982
ITGB2	1.19017	0.000418085
LDLRAD4	1.18965	4.27186e-07
TRIM3	1.18842	0.000186826
EZR	1.18296	5.07647e-06
ZBTB18	1.18182	0.00296114
PHLDA2	1.18044	0.000196036
CCDC167	1.17973	1.47521e-06
FIBIN	1.17839	0.00849541
RECQL4	1.17807	1.20831e-06
P2RY2	1.17801	0.000566388
IFITM10	1.17799	0.000597085
GATA3-AS1	1.17766	0.00702944
CCL17	1.1774	0.0265367
GAL3ST4	1.17733	1.55837e-05
FAR2	1.17609	0.0028624
HTRA1	1.17593	0.000132012
MCM2	1.17376	0.00143038
POC1A	1.17376	0.00020996
S100A2	1.17186	0.0259859
TMEM79	1.17161	2.71841e-06
CD5	1.17132	0.000667866
COMTD1	1.17114	3.29923e-06
BAI2	1.17089	0.00149967
CDT1	1.17051	0.000839559
PSEN2	1.17017	7.59564e-05
AC005789.11	1.16862	0.00190773
DUSP10	1.16536	0.00015197
BRSK2	1.16508	0.00474849
DNAI1	1.16502	0.0146965
CCNF	1.16488	7.76841e-06
FPR1	1.16456	0.00586173
BARD1	1.16456	8.42487e-05
C3AR1	1.1631	0.00740799
UCP2	1.16148	4.86147e-05
RAP2C	1.16051	0.000754528
TRIM59	1.16003	0.00136506
ADAMTS7	1.15993	0.000241209
IDH2	1.15765	1.26476e-06
EPPK1	1.15656	6.9088e-05
SIAH2-AS1	1.15642	0.0202506
KIFC2	1.15455	0.00185354
METRN	1.15105	0.00246176
CRB3	1.14886	0.000727797
MRPS7	1.14821	6.64042e-05
SLC6A6	1.14741	0.000218074
PLOD2	1.14496	0.00022596
PAQR6	1.14412	0.000967783
AP000487.6	1.1439	8.66593e-05
FCGR2A	1.1428	0.00523348
C8orf4	1.14205	0.019832
CCDC96	1.14036	0.000292796
LMCD1	1.13771	4.71858e-07
H2AFX	1.13637	3.02623e-05
GPR132	1.13545	0.00012069
RASGRF2	1.13527	0.00031606
TJP3	1.13426	0.000106921
FAIM3	1.13284	0.000984248
APOBR	1.12603	6.66683e-05
CIB1	1.12579	1.47469e-05
MRPS21	1.12245	0.0001098
CD84	1.12187	9.60927e-05
RP11-473M20.11	1.12057	0.00660974
AARD	1.12052	0.0147856
RNF183	1.11944	0.0248994
HSH2D	1.11854	0.000701545
EFNA3	1.11791	0.0110375
CDKN2D	1.1178	3.39004e-05
CYP2S1	1.11761	0.000398182
SPTSSB	1.1169	0.0371689
PARP12	1.11673	9.11283e-07
SGIP1	1.11669	0.00134637
VPREB3	1.11399	0.0236045
RP11-150O12.3	1.11397	0.0266537
ABCG1	1.11359	0.000187108
CHKB-AS1	1.11304	0.00494422
CALU	1.11228	9.10184e-06
SCIMP	1.11207	0.0155326
PRR15L	1.11141	0.000244363
CIT	1.11094	0.00180579
CUEDC1	1.11017	4.25027e-05
IFIT1	1.11007	0.0136057
CCND1	1.10868	8.64069e-05
HSD17B1	1.10851	0.000194795
AIFM3	1.10837	0.000124657
ARL11	1.10782	0.00710513
STX1A	1.10737	1.7263e-05
LAMTOR2	1.1067	3.40318e-06
VWA2	1.10623	0.00429888
BMP1	1.10563	1.45861e-05
SNRNP25	1.10534	1.08815e-05
VAV3	1.10501	0.000282449
CCNE1	1.10499	0.000455006
PROM2	1.10431	1.06185e-06
PRSS22	1.10304	0.000949461
CCL4	1.10267	0.0123322
MILR1	1.10125	0.00144141
ABCC5	1.10117	2.03271e-05
C5AR2	1.10084	0.0028566
POLB	1.10002	3.16988e-05
DRD4	1.09851	5.64275e-05
RGS19	1.09799	5.99138e-05
SFXN5	1.09674	3.8821e-05
STX6	1.09538	1.11489e-06
CAP2	1.09419	0.00384194
BMF	1.0932	0.000284198
SDSL	1.09309	3.03199e-05
MXRA5	1.09245	0.00156967
PTPN7	1.0917	0.000303674
ACOT4	1.09113	0.00231315
ADAMTS2	1.09093	0.00978374
43351	1.08981	3.19531e-05
S100A16	1.08946	0.000589001
IGFBP5	1.08849	0.000498072
CDK2AP2	1.08804	0.00021292
SULF2	1.08785	0.000298523
AC007362.1	1.08531	0.00227165
RP11-120K24.5	1.08383	0.00661696
COX20	1.08315	0.0345935
GOLT1A	1.08223	0.000267645
TTYH3	1.08219	6.15225e-06
NBL1	1.08185	0.000840378
CDH11	1.08154	9.52336e-05
MSRB1	1.08134	3.91597e-05
MMP14	1.08063	1.22501e-05
RUNX1	1.08025	2.74708e-05
CD2	1.07971	0.00267083
GTF3C1	1.07897	3.03305e-06
TMEM119	1.07772	0.000366345
MFSD2A	1.07532	0.0142744
C5AR1	1.07333	0.00153815
MCM4	1.07251	9.66749e-08
EGLN2	1.07148	2.63205e-06
COL6A2	1.07147	0.00303797
MAPKAPK2	1.07111	7.04236e-07
JADE3	1.06965	0.00325748
SCCPDH	1.06962	1.40475e-05
HSD3B7	1.06961	1.22424e-05
PPP1CA	1.06901	0.000295878
F11R	1.06606	1.47779e-06
ENSA	1.06515	1.83885e-05
COPZ2	1.06337	0.0015964
AMH	1.06115	0.00457545
ITGB5	1.06018	1.57152e-06
MDK	1.06005	0.000524118
TLE6	1.05836	0.00132151
SREBF1	1.05794	0.00653668
KRT19	1.05689	0.00046276
SGPL1	1.05612	2.12649e-06
LINC01116	1.0556	0.0093124
APOA1BP	1.05559	0.000210578
TRPM2	1.05554	1.16284e-05
LRRC56	1.05427	0.00019176
KCNS3	1.0542	0.00429401
EPN3	1.05225	0.000186526
SCUBE3	1.0522	0.000962964
KAZALD1	1.05116	0.000285495
PACSIN1	1.04968	0.00740121
DOC2A	1.0491	0.0215272
ASIC3	1.04717	0.000116191
RASSF7	1.04702	1.55808e-05
CPNE7	1.04674	0.0112006
NID2	1.04593	0.00910696
ITGAL	1.04453	0.000178248
IL2RG	1.04444	0.00320849
MAP4K1	1.04294	0.000304698
MIEN1	1.04233	0.00823917
SSC5D	1.04128	0.0159816
POLR2L	1.0409	0.000103684
LEPREL4	1.04015	1.23678e-06
IL11	1.03892	0.000621986
AGT	1.03892	0.0165576
USP35	1.03834	0.000278844
PRR19	1.03688	0.00036473
ARMC9	1.03427	2.16944e-07
MST1R	1.03128	5.21959e-05
RUNX2	1.03111	0.000433415
SPSB1	1.03108	0.00187525
RP11-523H20.3	1.03085	0.016554
SLC9A3R1	1.03083	0.00232763
ZNF552	1.02956	0.000118622
SYT17	1.02933	0.00569912
CLSTN2	1.02817	0.00455603
RP11-465B22.3	1.02778	0.0059728
IRF8	1.02762	0.00483376
NCKAP1L	1.02663	0.00034245
BPGM	1.02512	0.0012251
RNASEH2A	1.02441	7.55387e-05
IFITM3	1.02431	0.00116342
CDK5	1.0237	3.0115e-05
CDA	1.02283	0.0102773
LILRB1	1.02255	0.00955433
ASRGL1	1.02251	0.0113046
LIMK1	1.02214	1.00401e-06
KIF5C	1.02167	0.00161267
LRRC73	1.02159	0.00271779
CD83	1.02158	0.00154701
IFI44	1.02076	0.00971418
RUVBL1	1.02032	0.000115929
ADM2	1.0197	0.000907804
ECE2	1.01907	4.02389e-05
GIPR	1.01798	0.00363257
POSTN	1.01778	0.0303059
ALDH1B1	1.01774	5.35806e-06
PRR11	1.01708	0.00886894
TMED3	1.01603	0.000605462
C1orf122	1.01542	0.000354624
RAI14	1.01514	0.00251734
NAPSB	1.01513	0.000925946
ARHGAP22	1.01493	0.00128091
VASH1	1.01487	7.07516e-05
TSEN15	1.01451	5.76279e-05
MYO1D	1.01437	0.000368149
ORMDL2	1.01242	0.000771818
TUBG1	1.01166	0.000499939
TBC1D9	1.01022	0.00296227
APOC1	1.00978	0.00847026
CISH	1.00975	7.89407e-05
C1orf85	1.00947	2.09148e-05
VWA1	1.00824	3.61311e-06
RP13-582O9.7	1.00806	0.00243052
SIAH2	1.00782	0.0109882
CD276	1.00729	3.86586e-05
VMP1	1.00638	0.000504406
SELL	1.00343	0.0335209
MTL5	1.0022	0.00145753
BATF	1.00207	0.00159878
HILPDA	1.00202	0.000438461
CTD-2015H6.3	1.00166	0.000226207
HIST1H2BK	1.00093	0.0015542
KLHDC9	1.00053	0.00111902
CKAP4	1.00036	4.49383e-05
CCDC114	0.999841	0.00629505
AGR2	0.999254	0.0329265
SLC25A22	0.999176	7.62144e-06
UBXN10	0.999046	0.013974
TEKT2	0.998822	0.0175946
ERBB2	0.997815	0.00541001
LYPD3	0.99764	0.00810484
PSD3	0.996418	0.0179431
PKM	0.995237	0.00268322
LRFN4	0.994725	0.00197562
SRRM3	0.994613	0.000532666
MEGF6	0.993673	0.0154816
PRKCD	0.993537	7.25787e-06
CAMK1D	0.993348	0.0051493
COTL1	0.993333	0.000270058
CACNB3	0.993262	5.20339e-05
IFITM2	0.99288	0.00379768
HMCN2	0.992845	0.0495526
RP11-74C1.2	0.992661	0.001499
VCAN	0.991672	0.00490948
KCNC3	0.990808	0.00980344
ARPC1B	0.989871	5.46246e-09
TMEM86A	0.989692	0.00641495
FLAD1	0.988882	3.95373e-07
CARD11	0.988835	0.00135981
FAM102A	0.988568	1.77776e-05
RGS4	0.988497	0.0228682
MPC2	0.987304	0.00164258
DNASE1L2	0.987133	0.00131054
CYS1	0.986675	0.0238761
FAM173A	0.985688	2.88709e-05
SLC7A11	0.985451	0.0250039
CLEC7A	0.985172	0.0136297
PRAF2	0.984909	5.83333e-07
CD52	0.983651	0.00597157
SPATA5	0.9819	0.0156874
TFAP2B	0.981293	0.0196406
GNGT2	0.980623	0.00362447
TSPAN9	0.979791	2.76177e-05
SRPX2	0.979056	0.000425604
PFDN2	0.978931	0.00262386
DAP3	0.978843	0.000263438
CYB5A	0.977684	0.000655458
SLC12A5	0.977612	0.00520602
GMIP	0.977301	3.27443e-07
ZBP1	0.976823	0.00794643
DYNLL1-AS1	0.974344	0.00206909
RNPEP	0.973766	0.00095186
C17orf62	0.973312	2.36374e-08
C5orf30	0.972841	0.00335392
CD4	0.972085	0.00693179
TMEM121	0.971721	0.00031208
LGALS9	0.970779	0.000285539
SAMD9	0.970775	0.00475283
LDLRAD3	0.97038	0.00163402
ATP6V0B	0.968725	7.45364e-06
ADIPOR2	0.966218	0.000114349
HRASLS2	0.965677	0.0435985
MN1	0.965379	0.00394103
IFNGR2	0.964297	5.17423e-05
SSPO	0.964221	2.74001e-05
TCEAL1	0.96316	0.00828131
NRP2	0.963096	3.4921e-05
LRRC59	0.962568	5.32661e-05
NLRC5	0.962472	0.000480474
WNT5A	0.962343	0.0185181
GPR160	0.9612	0.00150457
PCGF2	0.960689	0.0044707
ROGDI	0.95972	5.32665e-05
SHISA9	0.959149	0.0233246
S100A10	0.95911	0.00214872
LGALS2	0.957744	0.0200251
ZNF710	0.955637	0.000648036
THBS2	0.955623	0.00263993
SHISA2	0.955592	0.0115895
DCTPP1	0.955348	1.45932e-05
CADM1	0.954863	0.0062806
APLNR	0.954402	0.00108138
ACBD6	0.952605	0.000864834
B4GALT3	0.952508	0.00118307
CDR2L	0.952296	0.00132377
SMS	0.951978	0.000100324
FBLN2	0.951162	0.000343108
PPP4C	0.951026	0.000895817
SLC52A3	0.949317	0.00282242
SLC39A11	0.949301	3.8129e-05
CPPED1	0.94919	0.00913372
CDC42SE1	0.948057	0.000207492
RP11-307C12.11	0.947931	0.00132213
PTGFRN	0.946752	4.87833e-05
SLC11A1	0.945991	0.000939752
SMAP2	0.945764	0.000340257
RGS14	0.945013	0.000704755
WDR1	0.94374	7.50949e-08
LMNB1	0.943303	0.0173607
TRIM7	0.942959	0.013858
COMMD5	0.942758	0.00117876
NTM	0.941953	0.0241187
MARCKSL1	0.941684	0.000196451
GALNT18	0.941364	0.00149625
RP4-616B8.4	0.939865	0.00966748
LSM4	0.939755	0.000309169
LIMD2	0.939421	0.000149238
DNALI1	0.938968	0.00774963
SAE1	0.938317	0.000591626
SYT7	0.93805	0.0110653
SPN	0.937789	0.00138025
KCNJ11	0.937234	0.00584568
FOXA1	0.936955	0.00395353
SASH3	0.936932	0.006424
FAM104A	0.936166	8.93258e-05
DOK1	0.935747	0.000874353
UQCR10	0.935612	0.000183413
CST7	0.93548	0.00173607
TNFRSF19	0.935292	0.00905609
TTC39A	0.93473	0.0058037
ALYREF	0.934416	0.000212732
ATOX1	0.934398	0.000288259
CORO1B	0.933956	0.000221178
RP11-339B21.10	0.932718	0.00383179
THBS1	0.932243	0.000900191
GREM1	0.931404	0.0233028
DNAH14	0.9306	0.00336432
C2CD2L	0.930486	8.02023e-06
SYK	0.930248	0.000546622
WDFY4	0.929828	0.00323956
TGFB3	0.929549	0.00239649
RGS3	0.929253	0.0055995
PTPRC	0.929066	0.019531
RUSC1	0.928026	0.00312803
CD37	0.927757	0.00224445
CLDN1	0.927563	0.0327623
MGST3	0.92729	0.00131267
PEA15	0.926679	7.70661e-05
SEPHS2	0.926401	0.000997472
CD3E	0.925745	0.0139796
KPTN	0.925356	0.000457275
HOXB7	0.924193	0.00130419
AMACR	0.924011	0.0112359
PARVG	0.92183	0.000545435
GLB1	0.921534	0.00270682
ELF4	0.920854	0.0107663
CCL5	0.92019	0.00532897
CD9	0.920183	0.000319965
RP11-157P1.4	0.919381	0.00343308
ETNK2	0.918798	0.0199109
PLXNA3	0.917622	2.01566e-05
DNAJC1	0.917449	0.000252853
PSMB3	0.917315	0.00446512
CDYL2	0.917168	0.00857217
PTGS1	0.916725	0.000176906
TSTA3	0.916264	5.34156e-05
RP11-53O19.3	0.915205	0.0362279
ATP6V0E2	0.915152	0.00249016
CD6	0.914321	0.00678088
NUAK1	0.91416	0.002188
SPR	0.913859	0.00262752
TBC1D7	0.913712	0.00674804
SECTM1	0.913398	0.000636306
CRIP2	0.912871	0.000452414
PPP1R26-AS1	0.911607	0.00948908
CBX4	0.91112	0.000328837
DPCD	0.910964	0.00143706
WAS	0.910707	0.00119352
PSPH	0.90979	0.00137998
ARNT2	0.909081	0.00286018
SLCO2B1	0.908499	7.36037e-05
VAV1	0.907823	0.000445133
CCT3	0.907823	0.000289571
ESPN	0.90763	0.00478156
CACFD1	0.907501	7.93134e-05
F13A1	0.907491	0.0400244
PRR5L	0.907161	0.0120758
CTSA	0.905464	2.41477e-05
REPS2	0.903962	0.0161097
SERF2	0.903577	0.00122909
RP11-889L3.4	0.903003	0.000822194
TMEM191A	0.90239	0.00158492
PSENEN	0.902314	0.00219977
SLC6A8	0.902067	2.96775e-05
AP3M2	0.901311	1.94979e-05
RAB3A	0.900998	0.0245522
ELFN1	0.900464	0.00141783
TNFSF13B	0.90017	0.0348694
CEACAM21	0.899717	0.00581152
CD53	0.899607	0.0270971
RRM2B	0.89915	0.000624251
UNC5C	0.89897	0.0114263
CSRNP2	0.898418	4.63957e-05
PTK6	0.898325	0.0130357
IGFBP7	0.898191	0.0160094
CDCA4	0.89802	0.00153847
MCU	0.897886	2.16432e-06
PYCRL	0.897587	0.000374649
LRRN2	0.896274	0.0030471
UBTD1	0.896061	1.529e-05
GSTCD	0.895741	0.00311452
FAM109B	0.894936	0.000521004
LEPRE1	0.894544	0.000554708
AOAH	0.894475	0.00231093
FCER1G	0.893435	0.0200416
SPECC1	0.893399	0.000833959
NCDN	0.892148	0.00203712
LRRC20	0.892059	0.0105409
PIK3R3	0.891209	0.00186868
RP11-382A20.2	0.890633	0.0044109
TMEM8A	0.888647	4.79418e-08
HOMER3	0.888295	0.000195462
DBNDD1	0.885877	0.0135183
COL5A3	0.885617	0.00124711
ABHD12	0.885292	0.000537945
QPRT	0.884884	0.0172649
NQO1	0.884461	0.0193305
RP11-432J24.2	0.883011	0.00512494
FAM101B	0.882236	0.0121768
TM6SF2	0.882205	0.015435
MESP2	0.881798	0.0193822
RALGPS2	0.881631	0.0148931
GPX8	0.881423	5.45861e-05
KIAA1462	0.88078	0.00230923
RASAL3	0.880542	0.000269955
SNAI3	0.880258	0.00206624
TLE3	0.880113	0.000913064
TSTD1	0.878658	0.0177971
BAIAP2L1	0.87864	1.45513e-05
NCS1	0.877365	8.73892e-05
CD27	0.876315	0.0115006
TRAFD1	0.876018	0.000863548
NAGK	0.875039	0.000261355
DBN1	0.874547	0.000180286
NEK6	0.874282	5.71868e-05
CORO2A	0.874229	9.67831e-05
OAZ1	0.874193	2.98356e-05
PPP1R14B	0.873629	0.00309658
EMB	0.873352	0.0095087
METTL2A	0.873245	0.000828411
SHB	0.873011	3.98634e-05
LSR	0.872991	0.00304872
FLYWCH2	0.872596	0.00116846
MRPL24	0.87252	0.00290531
RAD21	0.872427	0.0148071
ADAM8	0.872154	0.00653623
C20orf195	0.872132	0.0243142
TTC9	0.871963	0.000833671
CHST11	0.871763	0.00699734
PSMC4	0.871471	0.000807606
EPHA10	0.871186	0.00233191
NAT14	0.870815	3.22697e-05
C6orf211	0.870714	0.019007
NACC1	0.870249	0.0127276
ITGA5	0.870069	0.000506453
TBCB	0.870044	0.000528426
FBXO41	0.869965	1.51809e-05
RARA	0.869805	0.00298075
GJA5	0.869772	0.0226592
DUSP23	0.869645	0.000933
TIMP2	0.869443	0.00252744
AR	0.869369	0.00414905
EFNA4	0.86933	0.00370762
GPR161	0.868766	0.0113659
IL32	0.868131	0.00224077
PDGFB	0.866897	0.0038218
TRIB3	0.866655	0.00237746
IFIT3	0.86601	0.0125202
HCFC1R1	0.864788	4.01138e-06
ZNF703	0.864748	0.00284307
MRPS34	0.863779	0.000562983
TRIM14	0.863282	0.00227534
SLC22A18	0.863254	0.000105079
ANAPC11	0.863233	0.00112292
INSL3	0.863213	0.0200712
APOL1	0.862612	0.00147012
FAH	0.862353	0.00119226
HID1	0.861868	0.00180378
TFPT	0.861841	0.00271427
PRLR	0.86143	0.00117778
SLC52A2	0.861365	1.26664e-06
FAM26E	0.861301	0.00490887
NDUFV2	0.861238	0.0258849
RAB25	0.860816	0.0238396
PLD4	0.86072	0.00920316
ELP4	0.86056	0.00634178
DLL4	0.859571	0.00630839
SLC26A1	0.859532	0.015923
PPP6R1	0.859431	0.00227297
COL4A1	0.85909	0.000733696
MYEOV2	0.857217	0.0255158
GPC1	0.856905	5.99695e-06
ADAP1	0.856425	0.000680103
CCDC40	0.855117	0.00306561
ARF3	0.855026	7.63306e-05
MMP17	0.854439	0.00128354
KDM4B	0.854242	0.00509804
HMHA1	0.852982	0.000298327
AGL	0.85214	0.0142707
GPR162	0.851435	0.00317159
CCDC80	0.850659	0.00146874
SIGLEC1	0.850403	0.0114657
SMIM22	0.848856	0.023161
EVA1B	0.848829	0.000945615
SHOC2	0.848581	0.000867388
GRIP1	0.847745	0.0151227
TBXAS1	0.847362	0.000174648
NAGA	0.846742	1.46838e-05
TRIM62	0.84654	0.000593354
SHCBP1	0.846219	0.026624
MVP	0.846157	6.88911e-05
COX17	0.845712	0.000532712
ENO2	0.845326	0.0049299
SOCS1	0.845229	0.0130054
PIK3R5	0.844981	0.0320943
TRBC2	0.844815	0.0183055
KRT18	0.844714	0.0220109
NKD2	0.843798	0.000793313
TMEM134	0.843795	0.00210891
TREM2	0.843607	0.0246217
PTAFR	0.842964	0.00659199
HAGH	0.841897	0.00018192
TRPS1	0.841591	0.00844162
TPD52	0.840277	0.0111734
TM6SF1	0.84026	0.00140457
COLGALT1	0.840219	2.20851e-05
NUP210	0.839982	2.124e-05
GRN	0.83993	0.00185196
PLEKHO1	0.839628	0.000187064
HHAT	0.83829	0.0166837
FBP1	0.837017	0.00511231
TNFAIP8L2	0.836597	0.0252946
ARHGAP15	0.83617	0.0410974
MMP2	0.835716	0.00590149
DDX39A	0.83538	9.31647e-05
ZNF28	0.834415	0.00850946
HSPA2	0.833986	0.0355039
DHFR	0.832868	0.0259826
EFNA1	0.832749	0.00600689
C17orf72	0.831434	0.00700068
NFKBIE	0.830932	0.000214807
AC147651.4	0.830813	0.00221775
HOXC4	0.830557	0.000730728
FAM214B	0.830433	0.00172435
DHCR24	0.829741	0.0100249
IKBKB	0.828051	2.17322e-07
CDR2	0.827204	0.00190817
SCARF2	0.826192	0.00893533
SEZ6L2	0.824262	0.012453
CEP85	0.82405	0.000294062
RHBDF2	0.823204	0.00131259
GIPC1	0.822674	0.000138108
TOR3A	0.822466	1.10426e-05
BNIPL	0.822269	0.0047842
DOK3	0.822214	0.000256928
G6PD	0.822169	0.00618725
ANO9	0.821774	0.000693992
LAIR1	0.820872	0.00487238
ACOT7	0.820446	0.000719034
RP11-572C15.6	0.820246	0.0234679
ARHGDIB	0.819813	0.00220648
ADRA2C	0.819674	0.043575
DECR2	0.81954	0.000333496
PLXNA2	0.819343	0.00172975
SMIM5	0.818526	0.00969664
KIAA1211L	0.817329	0.0079203
SDCBP	0.81705	0.00262199
SHISA4	0.816766	0.000259284
FAM45A	0.816234	0.000803329
DRAXIN	0.815121	0.0169984
TIMP1	0.81464	0.000752127
CD247	0.814049	0.0392274
TIMELESS	0.812947	0.00876222
LILRB2	0.810942	0.013344
GUCD1	0.810761	0.00164189
PAPSS2	0.809644	0.00927939
ADCY7	0.809522	0.0280446
TRPV2	0.809155	0.000405595
FBXO46	0.808659	0.0124366
SCAMP3	0.808288	0.00117753
KCNAB2	0.808274	0.00809778
TSSC1	0.80626	0.00230542
TMEM110	0.805483	0.00077348
ARPC3	0.805178	0.000107814
TNS3	0.80507	0.000358107
C14orf80	0.803681	0.0380596
MGAT4A	0.803377	0.0110072
SERTAD3	0.803295	0.0173892
LPCAT1	0.803111	0.000374631
PDE4A	0.802978	0.00357667
TSFM	0.802896	0.00756574
IRF5	0.802515	0.00470825
ARSG	0.801023	0.00203709
C12orf49	0.800737	0.00576193
UHMK1	0.800434	0.000840292
SIT1	0.799934	0.0163241
POLR2K	0.798836	0.00120424
PFKFB4	0.798379	0.00303216
TMC6	0.796998	7.62518e-05
IMPDH1	0.796898	0.000517773
ZDHHC11	0.795553	0.022241
YWHAH	0.795166	5.09969e-05
KCNK1	0.794415	0.0318148
ARHGAP1	0.793822	4.77184e-05
VEGFA	0.793788	0.000411005
SPATA33	0.793068	0.000435643
CYB561D2	0.792945	0.00566647
KLHL12	0.792086	0.000435929
PRDX1	0.791965	0.00468864
YKT6	0.791905	0.00157718
ABI3	0.791456	0.000840733
SLC35F6	0.790684	0.000319735
SHKBP1	0.790433	0.00022738
ARL8A	0.789622	0.0266162
KIF22	0.787329	0.000507135
SLC20A2	0.786718	0.000204305
43161	0.786366	0.00137683
TPGS2	0.786182	0.000897427
COMMD4	0.786174	0.00400008
LEPREL2	0.786022	0.000741686
SYNGR2	0.785813	0.00407214
MAGED2	0.785239	0.00494422
XXbac-B135H6.15	0.785074	0.0264117
TRAPPC9	0.78464	0.000279708
PLA2G15	0.784571	0.00466018
PSMD4	0.784373	0.0029803
SHISA5	0.784215	0.000958497
SH3BGRL3	0.78397	0.0367318
YIF1B	0.78389	8.76859e-05
BRI3BP	0.783176	0.000393862
SPDEF	0.783113	0.0140658
APH1A	0.783088	0.000137556
TNFRSF18	0.783059	0.00634038
A4GALT	0.782264	0.0205182
SLC39A13	0.782205	0.000808782
CLN3	0.781044	0.00449935
ATG16L1	0.780077	0.00989947
TIMM10	0.779663	0.0153234
MBOAT2	0.778731	0.000380565
GLI3	0.778	0.00906627
KCP	0.776108	0.0205401
ANKH	0.775447	0.0001719
TMEM65	0.775272	0.0173776
HSPA4	0.774663	0.00032851
TAGLN2	0.774427	0.00150069
GLI1	0.773395	0.00752648
H2AFJ	0.772135	0.00741781
SLC6A9	0.771462	0.00701179
CTSD	0.770765	0.00586243
EIF4EBP1	0.77063	0.0088496
ADAP2	0.769443	0.0194548
SLC1A3	0.769439	0.0187424
INPP5J	0.768993	0.0119507
OTUB2	0.76896	0.00521692
SQLE	0.768746	0.014308
PIK3AP1	0.768719	0.0480039
KIAA0556	0.768573	0.00283796
CTD-2270L9.4	0.767553	0.0158618
C7orf43	0.767297	0.000921915
CNFN	0.76721	0.0176283
MYH9	0.766452	4.01213e-05
PARP9	0.766307	0.00160994
FAM83H	0.765151	0.000434095
HCN3	0.764977	0.00145061
ALDH3B1	0.764924	0.00261565
RP11-353N14.2	0.764581	0.0425587
RAPSN	0.764543	0.0308248
OXLD1	0.763276	0.00336797
FIG4	0.762876	0.00207701
SHROOM1	0.762045	0.0364426
CREB3L4	0.761989	0.00869793
HK1	0.76145	0.00157005
ABHD4	0.761195	0.0134898
PDRG1	0.760171	0.00382823
SAMD1	0.75955	0.00633525
ACOT2	0.759385	0.000354008
ARHGDIA	0.759154	0.0436507
ASPHD1	0.759088	0.0491383
CRELD2	0.758769	0.00109195
RTN4RL1	0.758652	0.0217202
CCDC125	0.758552	0.00153059
CHPF2	0.758	0.000987897
EVPL	0.757796	0.00338688
VPS37C	0.757758	0.000694855
SHROOM2	0.757495	0.00941268
RNF223	0.757109	0.0328442
TRIM11	0.756967	0.000628593
AK8	0.756738	0.0164054
IL10RA	0.756195	0.0188193
SLC39A1	0.755922	0.00182374
LOXL2	0.755906	0.00652274
TMEM104	0.754584	0.000428535
PILRA	0.754504	0.00730258
RABIF	0.753986	0.00146306
LRRC16B	0.753789	0.0062935
SH3GL1	0.753408	0.00180198
TMSB10	0.753277	0.00900572
RAB2A	0.753039	7.42857e-05
ZWILCH	0.752899	0.0280486
FERMT3	0.752197	0.0114144
RP11-629O1.2	0.752175	0.00216679
HCK	0.751625	0.0149513
PLEKHF2	0.751599	0.0178968
KCTD5	0.751448	0.000885067
HELZ2	0.75116	0.00324989
MPEG1	0.750614	0.0113735
FAM195A	0.750468	0.00592442
KIF21B	0.750219	0.0280068
CAP1	0.750103	0.00259445
TMA7	0.749815	0.0449084
MAD2L1	0.749263	0.0277879
PSAP	0.748898	0.00184305
DTX2	0.748439	0.000211858
NUDT16L1	0.748298	0.000568712
GDE1	0.748191	0.00137517
ADAMTS10	0.747713	0.00235775
BBC3	0.746929	0.00040447
RFX5	0.746625	0.00293685
MOV10L1	0.746316	0.0331478
CAMK2N1	0.746083	0.0338411
XPR1	0.745947	0.00223836
SLC50A1	0.745617	0.00206082
PBX3	0.745544	0.0260368
ATHL1	0.745537	0.0484575
ZDHHC24	0.745262	0.000424057
CTD-2555A7.2	0.744805	0.0169067
FAM53B	0.744716	0.00220118
GALNT10	0.743775	0.000416811
PCK2	0.743282	0.00282915
PSMD2	0.743132	0.000739604
ARPC5L	0.742431	0.00151656
RGS16	0.742059	0.0452462
STRA13	0.741364	0.0150852
GMDS	0.741309	0.0228558
CCL22	0.740827	0.0370921
AHNAK2	0.739708	0.0407881
BCL9	0.739658	0.00267675
CISD3	0.739646	0.0119168
UBA1	0.73854	0.00561976
CETN2	0.738043	0.0033892
PPP2R4	0.737931	0.00112493
GATA2	0.737224	0.00176412
CPEB2	0.735647	0.0315367
SPHK1	0.734862	0.00255987
INTS7	0.734808	0.00173914
NDUFS8	0.734745	0.00133336
NVL	0.734598	0.00173797
NADK	0.734507	0.000749982
SOX12	0.734424	0.000200973
FBXO25	0.734057	0.00821834
UCN	0.733847	0.00445408
TOR2A	0.733735	0.00847945
ACP2	0.733348	0.000760114
NRARP	0.73331	0.0144773
FUT8	0.73276	0.0124324
ABHD3	0.732467	0.0188521
PYCR2	0.732029	0.00140917
UNC93B1	0.731859	0.00140818
SEPW1	0.731658	0.00405504
NINJ1	0.731476	0.00228293
SYT11	0.731096	0.0198235
ENY2	0.730137	0.00421166
F2RL2	0.729643	0.0462134
NCSTN	0.729532	0.0202042
FAM83H-AS1	0.729158	0.0144579
FAM114A1	0.729046	0.000994969
CAPZB	0.728597	0.00183192
CTD-2583A14.11	0.728482	0.0111686
LINC00884	0.728405	0.0146552
FAM110A	0.727413	0.00693289
SKIL	0.727002	0.00976637
HK3	0.726868	0.0403062
RBBP7	0.726461	0.00450333
ADA	0.726008	0.01065
ULK4	0.724821	0.0145066
HLCS	0.724727	4.90386e-05
CCDC24	0.724593	0.0013345
DHX32	0.724421	0.0183847
ALDH1L2	0.724379	0.0425984
KCNJ5	0.724178	0.0278269
ATG9B	0.723423	0.00909527
MAPKAP1	0.721896	0.00049958
FAM105A	0.721706	0.0463278
PDK3	0.721429	0.00490624
HM13	0.721242	0.0037048
ARHGAP39	0.720892	0.00317219
AC006538.1	0.720224	0.018746
TRAF2	0.720049	0.000340113
ALDH18A1	0.719827	0.00525284
UQCC2	0.719213	0.00278382
PHKG2	0.719113	7.31619e-05
TMEM241	0.718801	0.00892739
SLC2A5	0.717791	0.0416106
FADS1	0.717211	0.0133316
HHIPL1	0.717112	0.00515423
ACRBP	0.717109	0.00346727
LSM10	0.715009	0.0110733
ANO7P1	0.713867	0.040721
FBXO10	0.713836	0.0436577
ASAP1	0.71318	0.000670468
MAFG-AS1	0.712531	0.00986943
PMVK	0.712514	0.00631909
SNPH	0.712474	0.013247
EDNRA	0.712243	0.023409
P4HA2	0.712016	0.0247967
GLRX2	0.71106	0.0399872
FARP1	0.710381	0.00717005
GRPEL2	0.710346	0.000278584
C4orf48	0.710091	0.00414515
GSR	0.70991	0.00586796
ZNF48	0.709727	0.00192579
ARHGEF16	0.708574	0.00115491
IRF1	0.708354	0.00431204
LASP1	0.7076	0.0418423
RNASE6	0.707527	0.03212
THOC6	0.707492	0.0141397
FAM107B	0.707311	0.044118
CTSB	0.706385	2.84405e-05
NME4	0.705725	0.0069092
LGALS1	0.704566	0.0127237
ID3	0.703969	0.0175397
INTS9	0.703345	0.00958735
GFER	0.702947	0.000628092
NPTXR	0.70272	0.0104259
ARL6IP1	0.702492	0.00118549
PLVAP	0.702465	0.00112613
TMEM62	0.702176	0.0326815
DPEP2	0.702176	0.031676
TPST2	0.70188	0.0180507
C1orf170	0.701706	0.0058168
PLCB2	0.701018	0.00816733
TMED9	0.700226	0.000673809
MRM1	0.699936	0.00831903
PPP2R1A	0.699317	0.0161785
BRCA1	0.698645	0.0119034
USP5	0.697722	0.00119459
TCP11L1	0.697646	0.00183912
UBE2A	0.697171	0.00139679
KIAA1279	0.696924	0.00160802
MRPL27	0.69673	0.00246997
RABAC1	0.696443	0.00239015
TNFAIP3	0.696431	0.00679031
RNF181	0.696074	0.00942934
CANT1	0.695417	0.0210108
KIAA0040	0.69525	0.00165897
ARPC2	0.695249	0.000551056
SLC12A7	0.694997	0.00179453
PSTPIP1	0.694815	0.0342388
TGIF1	0.694762	0.00706069
PPM1H	0.694686	0.00944102
ARHGAP31	0.694361	0.0108318
PISD	0.693769	0.0104402
RABEP2	0.692936	0.000562432
KLC2	0.692398	0.0141979
COG2	0.692207	0.00109757
SLC19A1	0.692053	0.000360348
COPG1	0.691503	4.5985e-05
CHST14	0.690729	0.029845
C16orf74	0.690709	0.0400657
LINC01137	0.690557	0.0197312
PDIA4	0.690492	0.000467256
HOXD-AS1	0.690076	0.028977
ROMO1	0.689914	0.0136253
SMPD1	0.689281	0.000246199
MTFR1	0.689061	0.0312651
LYPLA2	0.688944	0.00189856
SFXN3	0.68887	0.00033681
TARS2	0.688755	0.0282017
KIAA1841	0.68868	0.00520569
TANGO2	0.688218	0.00360379
ATP2A3	0.687853	0.00214449
FBXO36	0.687546	0.0244404
CSF1R	0.686301	0.0283501
ARMC1	0.686158	0.00588149
TACO1	0.68596	0.00205421
TPI1	0.685733	0.00121818
NNMT	0.685717	0.0385427
FAM120A	0.68556	0.00267883
AP2M1	0.68524	0.00361052
SAMD12	0.68524	0.0294773
TRIB1	0.684766	0.0491921
TBC1D10C	0.684751	0.0325015
TCIRG1	0.682311	0.00468138
AK1	0.682175	0.00014844
DLG3	0.682163	0.0105509
HNRNPAB	0.680618	0.0026641
BLVRB	0.68019	0.00670345
FTSJ1	0.679674	9.21003e-05
HYAL2	0.678968	0.0110533
BCL2L1	0.678717	0.0184025
CNOT11	0.678003	0.00431138
FAM127A	0.677743	0.00515144
CDC123	0.677488	0.00273368
NME1	0.677321	0.00339575
PARP14	0.677246	0.00683298
EFHD2	0.676428	0.000306751
PSME3	0.676129	0.000267954
PRR13	0.676069	0.0028038
DERL1	0.675995	2.48168e-05
DHRS4-AS1	0.675911	0.0481334
LMX1B	0.675832	0.0149786
SNAPC2	0.67568	0.0351274
NME3	0.67544	0.000585958
DNM3	0.675308	0.0471107
FAM189B	0.67518	0.00465184
OSBPL6	0.674559	0.0261622
OSBPL11	0.674492	0.0274548
PRRT2	0.67358	0.0374359
FMNL3	0.673495	0.000218493
PHF5A	0.673366	0.00891663
MORC2	0.673109	0.0207391
LDHA	0.673083	0.0324627
MBOAT7	0.672949	0.00222741
PTPN6	0.672759	0.000796198
MRPL17	0.671872	0.00135071
RAB8A	0.670789	0.00017118
DDX58	0.670696	0.00576933
CLPB	0.670132	0.00859246
LA16c-380H5.5	0.669712	0.0459046
ERH	0.669654	6.89541e-06
CISD1	0.669503	0.0218348
SLC17A9	0.669469	0.020029
GATAD2B	0.669086	0.00282739
DENND1C	0.669008	0.0155201
ARHGAP30	0.668949	0.00596469
SH3TC1	0.668921	0.000536183
LAMA5	0.668664	0.000200051
SIPA1L3	0.668579	0.0137214
ASNA1	0.668288	0.000389654
AMDHD2	0.668252	0.00615892
ZDHHC12	0.667757	0.00335176
MYO6	0.667253	0.00302957
ACTB	0.666439	0.00299954
ZMIZ1	0.665874	0.00134069
MZT2A	0.665361	0.0363444
FNTB	0.665225	0.00911422
HN1L	0.66517	0.00140151
DEGS1	0.665112	0.0115799
SEMA4B	0.664755	0.0365055
VCP	0.664744	0.000772514
PHF19	0.664591	0.00900999
CSTF2	0.664219	0.0425247
SERINC2	0.663994	0.019093
RP4-758J18.2	0.663544	0.0313191
DGKD	0.663219	0.00326694
KCTD15	0.663168	0.00265014
BAG2	0.663014	0.0406405
AKT1	0.662884	0.0210599
HCST	0.662258	0.0195035
TOR1A	0.662222	0.000672654
PCSK4	0.662068	0.017837
PPIL2	0.661474	0.0197803
RAB7A	0.661262	0.000467115
DTYMK	0.660876	0.00375947
MEIS3	0.660355	0.00313939
CKLF	0.659613	0.00177618
ZNF71	0.659468	0.00621305
DDA1	0.659194	0.0162548
KRTCAP2	0.658618	0.0380208
ACTR1A	0.65825	0.00112343
MYLK-AS1	0.658143	0.02589
ACP1	0.657188	0.000149056
SCRN1	0.65649	0.0144176
SSH3	0.656455	0.0296997
SURF4	0.656146	6.07355e-05
NEIL2	0.656078	0.00658955
MRC2	0.655975	0.0134788
NAA60	0.655408	0.00170077
CASP3	0.655147	0.00522909
ARF1	0.65497	0.000118636
RNF19A	0.654344	0.0102653
ARSJ	0.654289	0.02307
NR2F6	0.654157	0.00248519
YWHAB	0.654145	0.0026643
WBP1L	0.654112	0.00169627
C16orf87	0.654018	0.040832
CERS4	0.653054	0.0142336
ST14	0.652257	0.0217515
ICA1	0.652158	0.00761787
NUDCD1	0.652142	0.0447743
MAFB	0.651862	0.00819621
ZNF598	0.651739	0.0438845
GBP4	0.651356	0.0422944
LDB1	0.651318	0.0128139
RNF19B	0.650075	0.0310681
ZFAND3	0.64971	0.000817613
ALDOA	0.649366	0.0190922
BTBD19	0.649083	0.0364081
PHPT1	0.648139	0.00110552
P2RX4	0.647817	0.00287525
SCO2	0.646631	0.00422827
ADAR	0.646605	0.000858813
DFNB31	0.646272	0.0234632
C18orf32	0.646159	0.0388446
SLC25A10	0.646046	0.00377717
SAPCD2	0.645962	0.0405185
MEF2D	0.645588	0.00801859
ITGAM	0.645391	0.0100956
S1PR4	0.645248	0.0430744
UBE2L6	0.644064	0.0254489
MEX3A	0.643905	0.0418753
ENAH	0.643453	0.0152749
CTSS	0.642473	0.0391052
SNRNP40	0.641738	0.0164303
RER1	0.640359	0.00128753
RIPK3	0.640273	0.0110464
ARF6	0.639755	0.0131819
LMNB2	0.639488	0.000154186
ENO4	0.639169	0.0391647
PI4K2A	0.639117	0.00394372
C1orf162	0.639023	0.0367021
PIFO	0.638785	0.0149938
RAP2B	0.638631	0.00399861
SUV420H2	0.638423	0.00156352
DOLK	0.638326	0.00233374
SAC3D1	0.63827	0.00990535
NAP1L4	0.637954	0.00130242
PSMD8	0.637857	0.00127852
GPR137B	0.636734	0.0226806
C11orf84	0.636421	0.0156216
NTPCR	0.635861	0.016448
PRR7	0.635807	0.0118819
FURIN	0.635756	0.0160325
RP11-268J15.5	0.635146	0.015221
CENPH	0.634736	0.034635
MRPL47	0.634497	0.0238941
BCKDK	0.634407	0.00127763
SLC35A2	0.632983	0.00545029
CENPO	0.632807	0.0101655
PCBD1	0.631995	0.00750275
TBK1	0.631953	0.00971281
NPLOC4	0.631862	0.00145368
MEGF9	0.631206	0.00864938
MYL6	0.630504	0.0133435
TMEM9	0.630309	0.0311593
ORAI2	0.630228	0.00321586
RAB11FIP3	0.629634	0.000196374
GTF2IRD1	0.629632	0.000248574
PTK2B	0.62951	0.00337277
RAB4B	0.629464	0.0214746
PARVA	0.629125	0.000952678
RP11-452L6.5	0.628508	0.0126317
ST3GAL4	0.628451	0.000272974
TAF12	0.62844	0.0138463
SIDT1	0.628154	0.0291733
FAAH	0.627947	0.00895003
UROS	0.62767	0.00136776
HUS1	0.627315	0.00212835
PMF1	0.62729	0.0430893
GARS	0.626913	0.0426419
B3GALT6	0.626698	0.0195019
NDRG3	0.626566	0.00809021
OSBP2	0.62634	0.0117283
FAM174B	0.625689	0.031426
C1QA	0.625528	0.0260743
UFC1	0.625212	0.0460061
DYRK2	0.624875	0.0333402
YIF1A	0.62484	0.00196829
C11orf24	0.6239	0.000119031
PDE6D	0.623681	0.0130069
ABAT	0.623619	0.028064
AGPAT4	0.623491	0.0121298
NIPSNAP1	0.623431	0.0163637
TALDO1	0.623294	0.0260776
NDUFB4	0.622003	0.0244284
COPA	0.621251	0.000143225
KDM5B	0.621155	0.00193159
TRMT12	0.620928	0.0220411
C5orf15	0.620529	0.0181545
IRF6	0.620179	0.00310819
RAB20	0.619851	0.0216064
TNFAIP1	0.619847	0.00747033
TP53INP2	0.61974	0.0391911
NCF4	0.619525	0.0383883
ZNF480	0.619356	0.012342
NDUFAF6	0.619291	0.0440668
SLC30A4	0.619208	0.0474228
TIMM17B	0.61909	0.0203797
ZNF687	0.619066	0.00945549
PIGN	0.61897	0.00663452
PCNXL3	0.618869	0.00821052
PYGO2	0.618803	0.00808184
INSIG1	0.618709	0.00419994
COL18A1	0.61865	0.00133495
MRPL36	0.618448	0.0153251
SHARPIN	0.618391	0.00164823
LINC00094	0.617793	0.0238641
CORO7	0.616935	0.000303543
SLC2A4RG	0.616877	0.00391932
PSMG3	0.616523	0.00749985
ZNF672	0.616487	0.000749596
PIK3R6	0.61646	0.0296665
MAPK13	0.616308	0.0171737
MDGA1	0.616116	0.0192675
NOTCH3	0.615178	0.0122871
TBC1D2	0.614464	0.0469424
AZIN1	0.614099	0.0186054
SLC25A16	0.613966	0.00039071
ABCA3	0.613514	0.0288758
CSK	0.613406	0.000616134
FZD2	0.613139	0.0145036
PRICKLE1	0.613081	0.0330041
ZNF646	0.612709	0.0297842
MXRA8	0.61267	0.0233175
CPNE5	0.612668	0.0462323
PHF12	0.611429	0.000535247
WDR90	0.61127	0.00674352
UQCR11	0.611062	0.028664
PREB	0.609817	0.00501379
TNK2	0.60922	0.00420242
TMEM54	0.608441	0.0193277
FAM78A	0.608353	0.0145502
FAM50A	0.607988	0.000812496
RHOC	0.607706	0.00460574
PCYT1A	0.607701	0.00107335
SRI	0.607049	0.0213718
ICT1	0.606882	0.00724465
RMND5B	0.606808	0.00944628
USP39	0.606568	0.000219154
CHMP7	0.606422	0.0219637
CLEC11A	0.606328	0.00435851
ATP5J2	0.605836	0.0245605
TMEM127	0.605644	0.0191156
PARP1	0.605347	0.00185683
HEBP1	0.605143	0.039756
TWF2	0.604749	0.00198579
YDJC	0.604251	0.00554183
APOLD1	0.603735	0.0141607
LXN	0.60307	0.0494325
SRCAP	0.60263	0.00675201
RAVER1	0.602542	0.0125014
HMOX2	0.601882	0.00397556
PUSL1	0.60187	0.0291677
FHOD1	0.601375	0.012025
KAL1	0.601285	0.0162946
DNMT3A	0.601226	0.00897966
YARS	0.601179	0.00159319
SLCO2A1	0.60101	0.00482971
EFR3A	0.600654	0.0023637
AKR1A1	0.600647	0.0217662
LYN	0.599917	0.0388466
ESRP1	0.599698	0.045096
OTUD7B	0.599547	0.000472512
ERMP1	0.599055	0.0209935
CHST15	0.598912	0.00143857
RNF213	0.59885	0.0117523
TXNL4A	0.5984	0.000693763
STXBP2	0.598287	0.0211432
ZBTB42	0.598154	0.0216615
METRNL	0.598004	0.0158247
C11orf74	0.597309	0.0494846
MPV17L2	0.597194	0.00986259
SLC39A3	0.596965	0.00763673
LRRC37A3	0.596931	0.035304
MRPS12	0.593679	0.0343872
FGFRL1	0.593653	0.0197138
TMCO1	0.593296	0.00301073
HSD17B10	0.593052	0.0348999
AXL	0.59275	0.00647602
FSTL3	0.592359	0.0112576
FXYD5	0.59231	0.00661647
TRAF1	0.592302	0.0159772
RPUSD1	0.591765	0.00270157
AP1M2	0.591131	0.0287013
ANXA2	0.591032	0.00156728
ATP6V1C1	0.591014	0.021611
RAB37	0.59066	0.0116265
PET100	0.590605	0.0270796
IPO13	0.590596	0.00794554
MYO1G	0.590557	0.0450475
CUX1	0.590413	0.00545271
RHBDD3	0.59041	0.000819404
REXO2	0.589927	0.00232175
ZNFX1	0.589922	0.00264316
TRPM4	0.588827	0.00389766
HOXC9	0.588375	0.0281218
TFDP2	0.587999	0.00155292
BRICD5	0.587483	0.0497521
ALAD	0.587214	0.000795469
STYXL1	0.58689	0.00830664
VPS25	0.586772	0.010047
CTSC	0.586721	0.0320321
COPE	0.585676	0.00574194
DVL3	0.584916	0.00167972
JOSD2	0.584906	0.00542503
ALG3	0.584094	0.0160052
43168	0.583675	0.000121364
EXOC3L2	0.583355	0.0220216
TANGO6	0.582661	0.0132704
RPS6KA1	0.582425	0.00356012
SEC22B	0.581734	0.00918117
GAA	0.580724	0.00280534
GPR4	0.580612	0.00577743
MROH6	0.580419	0.0122302
B4GALT2	0.580415	0.000383941
SRA1	0.580125	0.0014022
RPLP0P2	0.579608	0.0386622
C9orf91	0.579392	0.00872094
CTTN	0.579133	0.00067333
NAPA	0.579132	0.0256798
ARRDC1	0.578811	0.0108834
EFTUD2	0.578761	0.00826816
TBC1D1	0.578424	0.0117007
TCEB2	0.578183	0.0106471
SEC16A	0.578073	0.0153931
EMC10	0.57738	0.0234951
GGCT	0.577315	0.0398841
CRTC1	0.576865	0.00122039
RALA	0.57663	0.0164724
TMEM189	0.576581	0.00616181
DCBLD1	0.576573	0.0231077
P4HB	0.576515	0.0422036
SAR1A	0.576258	1.03688e-05
LRP10	0.575652	0.0339826
TMEM106A	0.575387	0.0131798
SPATS2L	0.575297	0.0155542
MAPK9	0.575211	0.00256625
MYD88	0.575154	0.00954485
DUSP5	0.574279	0.0141067
GOSR2	0.573911	0.0044445
GPI	0.573829	0.0018892
ANKRD39	0.572988	0.028821
STK10	0.572932	0.00293478
TMEM87B	0.572272	0.00704478
ZCCHC10	0.571688	0.0178442
MANF	0.570975	0.0211696
MESDC1	0.570545	0.0428914
GDF11	0.570335	0.0249581
FAM49B	0.570036	0.0328746
LAMTOR1	0.569838	0.0498704
KCTD13	0.569658	0.0164792
GDI1	0.569612	0.0122978
MICU1	0.569275	0.00608796
VPS72	0.569237	0.00584908
GALNT2	0.569121	0.00685503
NDUFS3	0.569069	0.0184772
ANO10	0.568617	0.0375251
ISG20L2	0.56859	0.00507642
AP1B1	0.568462	0.0160568
DUSP28	0.567917	0.0160838
FLVCR1	0.567891	0.0137432
HMBS	0.567649	0.0226543
TAF10	0.56748	0.0391177
MLPH	0.567408	0.0449808
PARVB	0.56649	0.00928475
TM9SF1	0.566431	0.00429777
IL13RA1	0.566226	0.0294894
TRAF7	0.565638	0.0419493
RCE1	0.565482	0.0209683
DPP9	0.565054	0.00116183
PTK7	0.564972	0.0245237
GNAI2	0.564846	0.0105971
MICAL1	0.564667	0.00241723
PFN1	0.564387	0.0312673
DMPK	0.56314	0.0208756
ATP6AP1	0.562932	0.0118721
UBE2F	0.562908	0.00295345
SLC38A7	0.562319	0.00770996
PLXDC2	0.561702	0.00916981
FAM89B	0.561154	0.00922949
SRRM2-AS1	0.560943	0.0195369
OSCP1	0.560893	0.0255173
HOXC6	0.560542	0.0232377
PASK	0.560524	0.00815357
MED25	0.560512	0.0101152
R3HDM4	0.560317	0.00544878
GOLPH3L	0.560082	0.0151113
EMC9	0.559878	0.00516889
ATP5E	0.559761	0.00499357
RP11-65J3.1	0.559339	0.0431473
LZTR1	0.559214	0.00916414
DAPK3	0.559121	0.00710513
TRIM41	0.558824	0.00181373
NDUFS6	0.55861	0.0135831
MOGS	0.558509	0.00742328
SNRPB	0.55849	0.0397424
PPP1R26	0.558414	0.0174891
CAPN15	0.558016	0.0156286
MRPS11	0.557775	0.00194454
PGAM5	0.556957	0.00643365
PPME1	0.556763	0.044355
FKBP11	0.555792	0.0346668
AP2S1	0.555661	0.00888054
MEAF6	0.555383	0.0118428
CEP104	0.554773	0.000498331
CNPPD1	0.554272	0.00623641
DHX58	0.554138	0.0344754
FDXR	0.553623	0.0283621
CFL1	0.553245	0.0162141
CTSH	0.551936	0.0189742
UBAP2L	0.551841	0.00273291
COL16A1	0.551604	0.018144
MEF2BNB	0.551505	0.000510738
MPG	0.551458	0.0217773
KCTD21	0.551053	0.0311137
NUP93	0.550976	0.0239517
CACNA2D4	0.550673	0.0215298
DBNL	0.550603	0.00173253
CHST10	0.550332	0.0155932
TONSL	0.549773	0.00743444
DHTKD1	0.548465	0.00908428
MMP24-AS1	0.548245	0.0279018
PDLIM2	0.547896	0.0131435
ABRACL	0.547492	0.0298639
CMTM3	0.547275	0.0250632
WDR92	0.547178	0.00858687
HYAL3	0.546651	0.0172828
SEC61G	0.546257	0.0357007
ZFHX2	0.546239	0.0364785
CLTC	0.545883	0.0299485
CLDN7	0.545688	0.0146068
PIN1	0.545448	0.00599503
PWWP2B	0.544651	0.027052
ELK1	0.544623	0.0486375
NRSN2	0.544531	0.00890827
ADIPOR1	0.543571	0.00566248
KIAA0930	0.54279	0.00141537
USP14	0.542654	0.0186108
ZKSCAN5	0.542461	0.00363595
DYSF	0.542176	0.0266616
GSDMD	0.542166	0.00208586
TEAD4	0.54213	0.0213599
FAM213B	0.542047	0.031106
EHMT1	0.542005	0.00348568
TCEA3	0.541922	0.0271442
DNAJB11	0.541895	0.00184396
TAF2	0.541782	0.0306853
C17orf89	0.541686	0.0428537
LRRC1	0.541647	0.000934542
RAB17	0.541195	0.0318993
RAC1	0.541077	0.00189056
MAP4	0.540567	0.0067132
UBALD1	0.540363	0.00326179
TSPAN17	0.539839	0.00271109
CKAP5	0.539319	0.0019365
SEMA6B	0.539124	0.0330404
GUK1	0.538884	0.0128227
FBLIM1	0.538652	0.00686311
ASPSCR1	0.537565	0.0013402
BROX	0.537402	0.0324487
SLC43A2	0.537388	0.0374346
DCTN5	0.537346	0.000709173
STAM	0.537333	0.025217
EPS8L1	0.537228	0.0149369
CDCP1	0.537226	0.0433862
TXNRD1	0.536593	0.0315313
IKBKE	0.53633	0.00416736
AATF	0.536189	0.0139241
PIP4K2C	0.536031	0.0337665
XXYLT1	0.535475	0.047542
CALR	0.535219	0.0188701
MSI2	0.535195	0.0181422
COPB1	0.535048	0.0136579
POMT2	0.534992	0.00640087
LRWD1	0.534041	0.0164078
SLC38A10	0.53392	0.0158184
FST	0.533853	0.0439409
CNIH4	0.533768	0.011694
UBE3C	0.533513	0.000257024
CAPZA1	0.532648	0.0124625
MID1IP1	0.532107	0.0203874
PIGC	0.531989	0.0115389
ZMPSTE24	0.531799	0.0274834
LCMT1	0.531506	0.0313634
PLXND1	0.531317	0.00538435
SFI1	0.531158	0.00515346
DHRS7	0.530999	0.0386466
MAP4K2	0.530869	0.0329252
MGRN1	0.530256	0.0118749
GRAMD1A	0.529648	0.00336004
RFC2	0.52959	0.00783631
ANKRD50	0.529586	0.0487898
B9D2	0.529533	0.00726
GTF2E2	0.528696	0.0490233
TRIM47	0.528657	0.0451412
GSKIP	0.528656	0.0272523
TMEM141	0.528379	0.0373404
FAM32A	0.528211	0.00850981
PSMD5	0.527336	0.022878
PCDH1	0.526718	0.0200322
ABHD11	0.5266	0.0408005
NFATC4	0.526064	0.0274581
TRAF3IP1	0.525716	0.0315668
DCAF6	0.525409	0.00369096
H2AFY	0.525186	0.00405505
IFT27	0.525003	0.013798
SBNO2	0.524572	0.0140707
DAP	0.523195	0.00833486
MPV17	0.523194	0.00463512
VTI1A	0.523087	0.000741364
FBF1	0.522399	0.0222227
PDLIM7	0.521578	0.0206208
HS1BP3	0.521554	0.015678
DPM3	0.521375	0.0288006
TMEM147	0.521094	0.0474925
SPATS2	0.520591	0.00101181
C16orf72	0.519324	0.0368098
TMEM204	0.518759	0.0248405
SH3BP1	0.518526	0.0186205
RAB5C	0.51822	0.00296421
ARFIP2	0.517893	0.0355814
PEF1	0.517814	0.0472681
THBS3	0.517685	0.0403271
ZBTB7B	0.517642	0.0436584
CALM1	0.517556	0.00478489
ANKRD13B	0.517371	0.0305912
BCAP29	0.516402	0.00140414
OSTF1	0.516329	0.0205267
LRRC23	0.516231	0.0198984
LRRC25	0.516181	0.0344103
GUSB	0.515706	0.0284025
PTPRCAP	0.515181	0.0441974
ITPK1	0.514412	0.0494159
DYNLT1	0.513969	0.0353098
MOV10	0.513949	0.00613777
MSRB2	0.513179	0.0203683
KLHL17	0.512677	0.00404444
NANS	0.512437	0.0232365
ANXA6	0.511846	0.0329235
TMEM208	0.510909	0.0282473
ATP8B1	0.509495	0.0296648
FGD1	0.509238	0.0225651
FMNL1	0.507987	0.0254803
RAB13	0.507743	0.0247039
ORAI3	0.507088	0.0443235
RP11-1398P2.1	0.506418	0.0493836
FDX1L	0.505875	0.0315581
WWC3	0.505743	0.017291
STK4	0.505566	0.0155828
ADRBK1	0.50526	0.0145493
PLCB3	0.505174	0.0174291
DZIP1L	0.505022	0.0487203
YIPF2	0.504813	0.00659255
MRPL14	0.504733	0.048978
MGAT4B	0.504568	0.00988455
[truncated: 291 more rows]
